# Supplementary material for: Sublethal Radiation Affects Antigen Processing and Presentation Genes to Enhance Immunogenicity of Cancer Cells
Source: Int J Mol Sci. 2020 Apr 7;21(7):2573. doi: 10.3390/ijms21072573 (PMC7178186; doi:10.3390/ijms21072573)
Supplement: Supplementary file 1 [file ijms-21-02573-s001.zip › Table S1.xlsx]

## Sheet: A549
Ensembl gene ID	HGNC gene symbol	Entez gene ID	Description	Log2 fold-change	Raw P	FDR
ENSG00000185745	IFIT1	3434	interferon-induced protein with tetratricopeptide repeats 1 [Source:HGNC Symbol;Acc:HGNC:5407]	4.97712936596555	0	0
ENSG00000119922	IFIT2	3433	interferon-induced protein with tetratricopeptide repeats 2 [Source:HGNC Symbol;Acc:HGNC:5409]	4.52500794256799	0	0
ENSG00000119917	IFIT3	3437	interferon-induced protein with tetratricopeptide repeats 3 [Source:HGNC Symbol;Acc:HGNC:5411]	4.1374286920474	0	0
ENSG00000107201	DDX58	23586	DEAD (Asp-Glu-Ala-Asp) box polypeptide 58 [Source:HGNC Symbol;Acc:HGNC:19102]	3.57180340817891	1.65990008627243e-263	8.19824652609955e-260
ENSG00000132274	TRIM22	10346	tripartite motif containing 22 [Source:HGNC Symbol;Acc:HGNC:16379]	4.68944327206017	4.06359931694208e-245	1.60560936211015e-241
ENSG00000187608	ISG15	9636	ISG15 ubiquitin-like modifier [Source:HGNC Symbol;Acc:HGNC:4053]	4.73582751313096	8.57381990222667e-240	2.8230730998065e-236
ENSG00000168078	PBK	55872	PDZ binding kinase [Source:HGNC Symbol;Acc:HGNC:18282]	-3.58234772928516	4.18326876134511e-239	1.1806379664162e-235
ENSG00000135114	OASL	8638	2'-5'-oligoadenylate synthetase-like [Source:HGNC Symbol;Acc:HGNC:8090]	5.64425538420265	1.84175695952783e-227	4.54821881155399e-224
ENSG00000065328	MCM10	55388	minichromosome maintenance complex component 10 [Source:HGNC Symbol;Acc:HGNC:18043]	-3.3911668617922	2.18373362582126e-224	4.79353794574719e-221
ENSG00000137812	CASC5	57082	cancer susceptibility candidate 5 [Source:HGNC Symbol;Acc:HGNC:24054]	-3.16238955420256	3.14077862744321e-220	6.20492225637681e-217
ENSG00000184357	HIST1H1B	3009	histone cluster 1, H1b [Source:HGNC Symbol;Acc:HGNC:4719]	-4.15991742941585	1.74496325696472e-219	3.13395400950864e-216
ENSG00000137628	DDX60	55601	DEAD (Asp-Glu-Ala-Asp) box polypeptide 60 [Source:HGNC Symbol;Acc:HGNC:25942]	3.49279246168604	3.83461598559187e-218	6.31305611761275e-215
ENSG00000090889	KIF4A	24137	kinesin family member 4A [Source:HGNC Symbol;Acc:HGNC:13339]	-3.14037268095059	1.71944028643198e-217	2.58749593664688e-214
ENSG00000157601	MX1	4599	MX dynamin-like GTPase 1 [Source:HGNC Symbol;Acc:HGNC:7532]	5.86269221856645	1.83361728654871e-217	2.58749593664688e-214
ENSG00000138160	KIF11	3832	kinesin family member 11 [Source:HGNC Symbol;Acc:HGNC:6388]	-3.18009475851439	1.50061682902585e-212	1.97641240494899e-209
ENSG00000278828	HIST1H3H	8357	histone cluster 1, H3h [Source:HGNC Symbol;Acc:HGNC:4775]	-3.89058124824995	5.50224572184448e-212	6.79389790504747e-209
ENSG00000126787	DLGAP5	9787	discs, large (Drosophila) homolog-associated protein 5 [Source:HGNC Symbol;Acc:HGNC:16864]	-3.0529329728548	6.52849964297384e-211	7.58688464391713e-208
ENSG00000186871	ERCC6L	54821	excision repair cross-complementation group 6-like [Source:HGNC Symbol;Acc:HGNC:20794]	-3.55192524781769	4.37091155511441e-207	4.79731826015779e-204
ENSG00000186185	KIF18B	146909	kinesin family member 18B [Source:HGNC Symbol;Acc:HGNC:27102]	-3.26010938465892	4.12781766420877e-206	4.29206135653203e-203
ENSG00000145386	CCNA2	890	cyclin A2 [Source:HGNC Symbol;Acc:HGNC:1578]	-3.30834721630076	1.9822191114974e-205	1.95803603833714e-202
ENSG00000076382	SPAG5	10615	sperm associated antigen 5 [Source:HGNC Symbol;Acc:HGNC:13452]	-2.80217110222895	3.29569564914211e-205	3.10046491640245e-202
ENSG00000156970	BUB1B	701	BUB1 mitotic checkpoint serine/threonine kinase B [Source:HGNC Symbol;Acc:HGNC:1149]	-2.83196062597842	1.62077257791113e-204	1.4554537749642e-201
ENSG00000197299	BLM	641	Bloom syndrome, RecQ helicase-like [Source:HGNC Symbol;Acc:HGNC:1058]	-3.0389948038438	1.07697423660741e-203	9.25074044278954e-201
ENSG00000174371	EXO1	9156	exonuclease 1 [Source:HGNC Symbol;Acc:HGNC:3511]	-3.35090772677016	2.49146225089946e-202	2.05088867619874e-199
ENSG00000178999	AURKB	9212	aurora kinase B [Source:HGNC Symbol;Acc:HGNC:11390]	-3.22585280230654	7.26041002816942e-202	5.7374664206606e-199
ENSG00000143228	NUF2	83540	NUF2, NDC80 kinetochore complex component [Source:HGNC Symbol;Acc:HGNC:14621]	-3.40167035984073	1.64698110543401e-193	1.25145225842132e-190
ENSG00000089685	BIRC5	332	baculoviral IAP repeat containing 5 [Source:HGNC Symbol;Acc:HGNC:593]	-3.17678073367863	3.38112207250453e-192	2.47397954312591e-189
ENSG00000157456	CCNB2	9133	cyclin B2 [Source:HGNC Symbol;Acc:HGNC:1580]	-2.98655053529053	2.11526046987559e-189	1.49246735153079e-186
ENSG00000198826	ARHGAP11A	9824	Rho GTPase activating protein 11A [Source:HGNC Symbol;Acc:HGNC:15783]	-2.85791695441046	5.14154862864507e-187	3.50263567956938e-184
ENSG00000075702	WDR62	284403	WD repeat domain 62 [Source:HGNC Symbol;Acc:HGNC:24502]	-2.7286306581952	9.25322211492764e-187	6.09355520341701e-184
ENSG00000112742	TTK	7272	TTK protein kinase [Source:HGNC Symbol;Acc:HGNC:12401]	-3.20424083870591	4.40216966609637e-186	2.80546012656129e-183
ENSG00000171320	ESCO2	157570	establishment of sister chromatid cohesion N-acetyltransferase 2 [Source:HGNC Symbol;Acc:HGNC:27230]	-3.17635038436147	2.18423077459547e-184	1.34848947446588e-181
ENSG00000135451	TROAP	10024	trophinin associated protein [Source:HGNC Symbol;Acc:HGNC:12327]	-3.30004151962481	1.8332839301199e-183	1.09752597949845e-180
ENSG00000100297	MCM5	4174	minichromosome maintenance complex component 5 [Source:HGNC Symbol;Acc:HGNC:6948]	-2.71843780796794	7.26562216650692e-182	4.22175386827973e-179
ENSG00000169679	BUB1	699	BUB1 mitotic checkpoint serine/threonine kinase [Source:HGNC Symbol;Acc:HGNC:1148]	-2.91145405091134	1.29881844996824e-180	7.33127351359215e-178
ENSG00000072571	HMMR	3161	hyaluronan-mediated motility receptor (RHAMM) [Source:HGNC Symbol;Acc:HGNC:5012]	-2.94451634694786	1.88270216780046e-180	1.03318511186294e-177
ENSG00000142731	PLK4	10733	polo-like kinase 4 [Source:HGNC Symbol;Acc:HGNC:11397]	-3.31057281798481	1.78961330923654e-178	9.55556771277757e-176
ENSG00000024526	DEPDC1	55635	DEP domain containing 1 [Source:HGNC Symbol;Acc:HGNC:22949]	-3.00197697345259	1.04244608934379e-177	5.4196223529147e-175
ENSG00000196787	HIST1H2AG	8969	histone cluster 1, H2ag [Source:HGNC Symbol;Acc:HGNC:4737]	-3.70468739359548	1.99286119285463e-177	1.00951194169323e-174
ENSG00000117650	NEK2	4751	NIMA-related kinase 2 [Source:HGNC Symbol;Acc:HGNC:7745]	-3.29927703902073	2.95240809438723e-176	1.45819435781785e-173
ENSG00000137965	IFI44	10561	interferon-induced protein 44 [Source:HGNC Symbol;Acc:HGNC:16938]	6.93200240734177	3.338108622896e-175	1.60847985253496e-172
ENSG00000109805	NCAPG	64151	non-SMC condensin I complex, subunit G [Source:HGNC Symbol;Acc:HGNC:24304]	-3.09705387669434	1.17880700695755e-174	5.54488362606031e-172
ENSG00000051341	POLQ	10721	polymerase (DNA directed), theta [Source:HGNC Symbol;Acc:HGNC:9186]	-2.63472090171525	4.89503264164187e-173	2.24898290391341e-170
ENSG00000138180	CEP55	55165	centrosomal protein 55kDa [Source:HGNC Symbol;Acc:HGNC:1161]	-2.87005248439418	1.90553880675387e-171	8.55586924232488e-169
ENSG00000101057	MYBL2	4605	v-myb avian myeloblastosis viral oncogene homolog-like 2 [Source:HGNC Symbol;Acc:HGNC:7548]	-3.51633327595905	2.45509052942883e-171	1.07783929998658e-168
ENSG00000144554	FANCD2	2177	Fanconi anemia, complementation group D2 [Source:HGNC Symbol;Acc:HGNC:3585]	-2.48747590313469	1.84209077993583e-170	7.911379445307e-168
ENSG00000198901	PRC1	9055	protein regulator of cytokinesis 1 [Source:HGNC Symbol;Acc:HGNC:9341]	-2.78971983850977	1.19833315236595e-168	5.03707867194505e-166
ENSG00000166803	KIAA0101	9768	KIAA0101 [Source:HGNC Symbol;Acc:HGNC:28961]	-2.87752860500202	1.53867103360384e-168	6.33291352914115e-166
ENSG00000111206	FOXM1	2305	forkhead box M1 [Source:HGNC Symbol;Acc:HGNC:3818]	-3.01182701576402	3.20373440052475e-168	1.29169340442382e-165
ENSG00000118193	KIF14	9928	kinesin family member 14 [Source:HGNC Symbol;Acc:HGNC:19181]	-2.90183751876623	5.53828933083887e-168	2.18828888040105e-165
ENSG00000122952	ZWINT	11130	ZW10 interacting kinetochore protein [Source:HGNC Symbol;Acc:HGNC:13195]	-2.71827610944253	1.30417732671416e-167	5.05202495422843e-165
ENSG00000274267	HIST1H3B	8358	histone cluster 1, H3b [Source:HGNC Symbol;Acc:HGNC:4776]	-3.99797794041958	1.83303775392256e-166	6.96413343586425e-164
ENSG00000121152	NCAPH	23397	non-SMC condensin I complex, subunit H [Source:HGNC Symbol;Acc:HGNC:1112]	-3.19407202326519	4.34311283897669e-166	1.61891579710988e-163
ENSG00000169607	CKAP2L	150468	cytoskeleton associated protein 2-like [Source:HGNC Symbol;Acc:HGNC:26877]	-3.13185524836863	7.13981854471857e-166	2.61211583647148e-163
ENSG00000274997	HIST1H2AH	85235	histone cluster 1, H2ah [Source:HGNC Symbol;Acc:HGNC:13671]	-4.0098614240369	7.40822883867698e-166	2.66103579885277e-163
ENSG00000124762	CDKN1A	1026	cyclin-dependent kinase inhibitor 1A (p21, Cip1) [Source:HGNC Symbol;Acc:HGNC:1784]	2.63564571279945	2.06646036682371e-165	7.29017696553022e-163
ENSG00000163808	KIF15	56992	kinesin family member 15 [Source:HGNC Symbol;Acc:HGNC:17273]	-3.24823429362753	2.59880407386584e-165	9.00736373391114e-163
ENSG00000126709	IFI6	2537	interferon, alpha-inducible protein 6 [Source:HGNC Symbol;Acc:HGNC:4054]	3.96922837602378	2.24222475680886e-164	7.63748143026137e-162
ENSG00000138496	PARP9	83666	poly (ADP-ribose) polymerase family, member 9 [Source:HGNC Symbol;Acc:HGNC:24118]	2.66250886036642	2.47312003388951e-164	8.28117955754595e-162
ENSG00000184270	HIST2H2AB	317772	histone cluster 2, H2ab [Source:HGNC Symbol;Acc:HGNC:20508]	-3.83225573100713	1.17366468464064e-163	3.86448658496007e-161
ENSG00000143476	DTL	51514	denticleless E3 ubiquitin protein ligase homolog (Drosophila) [Source:HGNC Symbol;Acc:HGNC:30288]	-2.74932732988612	1.94139621270969e-163	6.28757763578568e-161
ENSG00000203814	HIST2H2BF	440689	histone cluster 2, H2bf [Source:HGNC Symbol;Acc:HGNC:24700]	-3.28382751154226	1.90643430233008e-161	6.07476065755371e-159
ENSG00000071539	TRIP13	9319	thyroid hormone receptor interactor 13 [Source:HGNC Symbol;Acc:HGNC:12307]	-2.71464993130974	2.43702051835192e-161	7.64218688262867e-159
ENSG00000170312	CDK1	983	cyclin-dependent kinase 1 [Source:HGNC Symbol;Acc:HGNC:1722]	-3.01280848714747	1.03188292066491e-159	3.1852935907275e-157
ENSG00000184661	CDCA2	157313	cell division cycle associated 2 [Source:HGNC Symbol;Acc:HGNC:14623]	-2.70752876487217	3.10955936742488e-159	9.45114690197631e-157
ENSG00000175063	UBE2C	11065	ubiquitin-conjugating enzyme E2C [Source:HGNC Symbol;Acc:HGNC:15937]	-3.38303421659883	1.29285094067183e-158	3.86993381574433e-156
ENSG00000011426	ANLN	54443	anillin, actin binding protein [Source:HGNC Symbol;Acc:HGNC:14082]	-2.91890908470195	2.57904206671347e-158	7.604709711939e-156
ENSG00000237649	KIFC1	3833	kinesin family member C1 [Source:HGNC Symbol;Acc:HGNC:6389]	-3.22078760968838	5.50430741671248e-158	1.59916319594958e-155
ENSG00000273703	HIST1H2BM	8342	histone cluster 1, H2bm [Source:HGNC Symbol;Acc:HGNC:4750]	-4.35282125414477	1.14949512777683e-157	3.29122112237088e-155
ENSG00000166508	MCM7	4176	minichromosome maintenance complex component 7 [Source:HGNC Symbol;Acc:HGNC:6950]	-2.52631651586068	5.40613989621681e-157	1.52576713985228e-154
ENSG00000117399	CDC20	991	cell division cycle 20 [Source:HGNC Symbol;Acc:HGNC:1723]	-3.29681652934711	1.25758439371643e-156	3.49927285665658e-154
ENSG00000131153	GINS2	51659	GINS complex subunit 2 (Psf2 homolog) [Source:HGNC Symbol;Acc:HGNC:24575]	-3.40759147570107	6.45820755714253e-156	1.77206039581816e-153
ENSG00000142945	KIF2C	11004	kinesin family member 2C [Source:HGNC Symbol;Acc:HGNC:6393]	-3.14270778625055	2.33655736834442e-155	6.32342840671403e-153
ENSG00000185130	HIST1H2BL	8340	histone cluster 1, H2bl [Source:HGNC Symbol;Acc:HGNC:4748]	-3.92333107081241	1.30804136119229e-154	3.49211690969121e-152
ENSG00000139618	BRCA2	675	breast cancer 2, early onset [Source:HGNC Symbol;Acc:HGNC:1101]	-2.64411252066226	2.48927415084975e-154	6.55708001655837e-152
ENSG00000276180	HIST1H4I	8294	histone cluster 1, H4i [Source:HGNC Symbol;Acc:HGNC:4793]	-4.2946223109953	6.68146490039028e-154	1.73682921805408e-151
ENSG00000166851	PLK1	5347	polo-like kinase 1 [Source:HGNC Symbol;Acc:HGNC:9077]	-3.15732484895434	9.37710175150962e-154	2.40589639224447e-151
ENSG00000274290	HIST1H2BE	8344	histone cluster 1, H2be [Source:HGNC Symbol;Acc:HGNC:4753]	-3.79083520863551	1.17100495887113e-153	2.96594538044335e-151
ENSG00000094804	CDC6	990	cell division cycle 6 [Source:HGNC Symbol;Acc:HGNC:1744]	-2.76183573560149	3.59869378362483e-153	8.99946764421419e-151
ENSG00000146918	NCAPG2	54892	non-SMC condensin II complex, subunit G2 [Source:HGNC Symbol;Acc:HGNC:21904]	-2.3369482183948	6.7100254197476e-153	1.65704077740667e-150
ENSG00000122966	CIT	11113	citron rho-interacting serine/threonine kinase [Source:HGNC Symbol;Acc:HGNC:1985]	-2.42725062129538	8.69000936485503e-152	2.11950401249477e-149
ENSG00000066279	ASPM	259266	asp (abnormal spindle) homolog, microcephaly associated (Drosophila) [Source:HGNC Symbol;Acc:HGNC:19048]	-2.43902541690044	2.14870610143302e-151	5.17680948047692e-149
ENSG00000161888	SPC24	147841	SPC24, NDC80 kinetochore complex component [Source:HGNC Symbol;Acc:HGNC:26913]	-3.52475133485137	3.29228567601423e-151	7.83643323076352e-149
ENSG00000276410	HIST1H2BB	3018	histone cluster 1, H2bb [Source:HGNC Symbol;Acc:HGNC:4751]	-3.10853950858964	9.23603999723594e-151	2.1722286450642e-148
ENSG00000164611	PTTG1	9232	pituitary tumor-transforming 1 [Source:HGNC Symbol;Acc:HGNC:9690]	-2.95683319069406	7.82508645901475e-149	1.81873421275642e-146
ENSG00000173207	CKS1B	1163	CDC28 protein kinase regulatory subunit 1B [Source:HGNC Symbol;Acc:HGNC:19083]	-2.61380587055859	6.32210756169124e-148	1.452320430102e-145
ENSG00000198056	PRIM1	5557	primase, DNA, polypeptide 1 (49kDa) [Source:HGNC Symbol;Acc:HGNC:9369]	-2.93122831250802	6.96034830195738e-148	1.58055909256862e-145
ENSG00000171241	SHCBP1	79801	SHC SH2-domain binding protein 1 [Source:HGNC Symbol;Acc:HGNC:29547]	-3.20113411275662	4.88633263851764e-147	1.09698167734721e-144
ENSG00000111665	CDCA3	83461	cell division cycle associated 3 [Source:HGNC Symbol;Acc:HGNC:14624]	-2.83758286293728	9.65625228537892e-147	2.14347101292074e-144
ENSG00000140534	TICRR	90381	TOPBP1-interacting checkpoint and replication regulator [Source:HGNC Symbol;Acc:HGNC:28704]	-2.86897571819467	1.11012930784404e-146	2.43685717841854e-144
ENSG00000139734	DIAPH3	81624	diaphanous-related formin 3 [Source:HGNC Symbol;Acc:HGNC:15480]	-2.94522840077518	5.82641290137864e-146	1.26490783823776e-143
ENSG00000167900	TK1	7083	thymidine kinase 1, soluble [Source:HGNC Symbol;Acc:HGNC:11830]	-3.07860642119945	8.93763495365555e-146	1.91925995809151e-143
ENSG00000233822	HIST1H2BN	8341	histone cluster 1, H2bn [Source:HGNC Symbol;Acc:HGNC:4749]	-3.21529934277632	4.9959239115045e-145	1.06128465371702e-142
ENSG00000165304	MELK	9833	maternal embryonic leucine zipper kinase [Source:HGNC Symbol;Acc:HGNC:16870]	-2.53617911276293	5.90227643161896e-145	1.24048269343685e-142
ENSG00000117226	GBP3	2635	guanylate binding protein 3 [Source:HGNC Symbol;Acc:HGNC:4184]	3.35905276424423	1.1636330780298e-144	2.4198668515323e-142
ENSG00000079616	KIF22	3835	kinesin family member 22 [Source:HGNC Symbol;Acc:HGNC:6391]	-2.32533520311429	2.37873285305423e-144	4.89523398384786e-142
ENSG00000085840	ORC1	4998	origin recognition complex, subunit 1 [Source:HGNC Symbol;Acc:HGNC:8487]	-2.85398521266017	1.05007007459509e-143	2.13867880347428e-141
ENSG00000111445	RFC5	5985	replication factor C (activator 1) 5, 36.5kDa [Source:HGNC Symbol;Acc:HGNC:9973]	-2.37322141004266	2.47142714333711e-143	4.98219537181305e-141
ENSG00000088325	TPX2	22974	TPX2, microtubule-associated [Source:HGNC Symbol;Acc:HGNC:1249]	-2.53381262098046	4.95725743042478e-143	9.89248260560322e-141
ENSG00000168016	TRANK1	9881	tetratricopeptide repeat and ankyrin repeat containing 1 [Source:HGNC Symbol;Acc:HGNC:29011]	3.10636404671065	5.99971609162091e-143	1.18530391106063e-140
ENSG00000113368	LMNB1	4001	lamin B1 [Source:HGNC Symbol;Acc:HGNC:6637]	-2.76001462362384	7.9088720843406e-143	1.5470067019627e-140
ENSG00000151725	CENPU	79682	centromere protein U [Source:HGNC Symbol;Acc:HGNC:21348]	-3.02714437515232	1.12555577305909e-142	2.18004704436817e-140
ENSG00000197153	HIST1H3J	8356	histone cluster 1, H3j [Source:HGNC Symbol;Acc:HGNC:4774]	-3.79367084788885	1.38208915909157e-142	2.65092751718573e-140
ENSG00000124575	HIST1H1D	3007	histone cluster 1, H1d [Source:HGNC Symbol;Acc:HGNC:4717]	-3.82391580923181	5.7413547271059e-142	1.09063657681446e-139
ENSG00000137804	NUSAP1	51203	nucleolar and spindle associated protein 1 [Source:HGNC Symbol;Acc:HGNC:18538]	-2.39862432222717	7.91632678528133e-142	1.48947573304779e-139
ENSG00000103742	IGDCC4	57722	immunoglobulin superfamily, DCC subclass, member 4 [Source:HGNC Symbol;Acc:HGNC:13770]	2.7771203676163	2.58534960516129e-141	4.81850630184589e-139
ENSG00000278463	HIST1H2AB	8335	histone cluster 1, H2ab [Source:HGNC Symbol;Acc:HGNC:4734]	-3.86655860948678	1.1381679993733e-140	2.10146233603914e-138
ENSG00000274641	HIST1H2BO	8348	histone cluster 1, H2bo [Source:HGNC Symbol;Acc:HGNC:4758]	-3.87715309632045	1.25539449601977e-140	2.29644200586727e-138
ENSG00000075218	GTSE1	51512	G-2 and S-phase expressed 1 [Source:HGNC Symbol;Acc:HGNC:13698]	-3.07654090680183	6.69765964149227e-139	1.21393544841579e-136
ENSG00000117724	CENPF	1063	centromere protein F, 350/400kDa [Source:HGNC Symbol;Acc:HGNC:1857]	-2.78145211735602	5.46288226986986e-138	9.81133655668627e-136
ENSG00000156802	ATAD2	29028	ATPase family, AAA domain containing 2 [Source:HGNC Symbol;Acc:HGNC:30123]	-2.45267031409587	2.14724847911946e-137	3.82171540121478e-135
ENSG00000111335	OAS2	4939	2'-5'-oligoadenylate synthetase 2, 69/71kDa [Source:HGNC Symbol;Acc:HGNC:8087]	5.33207436390093	9.20738663602206e-137	1.62411723554689e-134
ENSG00000012048	BRCA1	672	breast cancer 1, early onset [Source:HGNC Symbol;Acc:HGNC:1100]	-2.23315032078976	1.82632351480182e-136	3.19299534145352e-134
ENSG00000134057	CCNB1	891	cyclin B1 [Source:HGNC Symbol;Acc:HGNC:1579]	-2.67586324568399	3.83292900868944e-136	6.64239872769023e-134
ENSG00000278272	HIST1H3C	8352	histone cluster 1, H3c [Source:HGNC Symbol;Acc:HGNC:4768]	-3.84341726772632	7.31589566095246e-136	1.25680725806762e-133
ENSG00000275126	HIST1H4L	8368	histone cluster 1, H4l [Source:HGNC Symbol;Acc:HGNC:4791]	-4.50084713848775	2.38970159521778e-135	4.06990902716572e-133
ENSG00000165490	DDIAS	220042	DNA damage-induced apoptosis suppressor [Source:HGNC Symbol;Acc:HGNC:26351]	-3.17236124935703	4.14987565337493e-135	7.0072601203483e-133
ENSG00000183598	HIST2H3D	653604	histone cluster 2, H3d [Source:HGNC Symbol;Acc:HGNC:25311]	-3.66547463619887	1.98118191677079e-134	3.3169686396376e-132
ENSG00000112984	KIF20A	10112	kinesin family member 20A [Source:HGNC Symbol;Acc:HGNC:9787]	-2.89241378340634	4.83284908513953e-134	8.02334172487534e-132
ENSG00000134690	CDCA8	55143	cell division cycle associated 8 [Source:HGNC Symbol;Acc:HGNC:14629]	-3.08766741112936	7.24733902020243e-134	1.19315358069266e-131
ENSG00000278677	HIST1H2AM	8336	histone cluster 1, H2am [Source:HGNC Symbol;Acc:HGNC:4735]	-3.51338427217856	1.05539728366924e-133	1.72317592860905e-131
ENSG00000205413	SAMD9	54809	sterile alpha motif domain containing 9 [Source:HGNC Symbol;Acc:HGNC:1348]	2.79452494623576	7.71118466705316e-133	1.24870626460903e-130
ENSG00000109674	NEIL3	55247	nei endonuclease VIII-like 3 (E. coli) [Source:HGNC Symbol;Acc:HGNC:24573]	-2.72350364497024	9.39364961074121e-133	1.50474192758491e-130
ENSG00000138778	CENPE	1062	centromere protein E, 312kDa [Source:HGNC Symbol;Acc:HGNC:1856]	-2.35015880285839	9.44462436831993e-133	1.50474192758491e-130
ENSG00000196584	XRCC2	7516	X-ray repair complementing defective repair in Chinese hamster cells 2 [Source:HGNC Symbol;Acc:HGNC:12829]	-2.65606362482578	1.52643315078725e-132	2.41249706615623e-130
ENSG00000035499	DEPDC1B	55789	DEP domain containing 1B [Source:HGNC Symbol;Acc:HGNC:24902]	-2.87396246078353	9.03662178368591e-131	1.41688492030555e-128
ENSG00000102384	CENPI	2491	centromere protein I [Source:HGNC Symbol;Acc:HGNC:3968]	-2.92820755398101	1.39355792210604e-130	2.16780553615173e-128
ENSG00000093009	CDC45	8318	cell division cycle 45 [Source:HGNC Symbol;Acc:HGNC:1739]	-3.15988187747117	1.52260572869648e-129	2.35004677938498e-127
ENSG00000228716	DHFR	1719	dihydrofolate reductase [Source:HGNC Symbol;Acc:HGNC:2861]	-2.31411138519122	2.75491534047879e-129	4.21907809817822e-127
ENSG00000163507	KIAA1524	57650	KIAA1524 [Source:HGNC Symbol;Acc:HGNC:29302]	-2.5050329520135	9.67351444846791e-129	1.47007654956871e-126
ENSG00000092470	WDR76	79968	WD repeat domain 76 [Source:HGNC Symbol;Acc:HGNC:25773]	-2.80420990577398	1.21960160244485e-128	1.83927093571759e-126
ENSG00000176208	ATAD5	79915	ATPase family, AAA domain containing 5 [Source:HGNC Symbol;Acc:HGNC:25752]	-2.36381591961939	2.41969701288947e-128	3.62147986262457e-126
ENSG00000129810	SGOL1	151648	shugoshin-like 1 (S. pombe) [Source:HGNC Symbol;Acc:HGNC:25088]	-3.20594563919378	3.26705815896949e-128	4.85293240515799e-126
ENSG00000111247	RAD51AP1	10635	RAD51 associated protein 1 [Source:HGNC Symbol;Acc:HGNC:16956]	-2.69335273482049	4.25502485278521e-128	6.27330380534512e-126
ENSG00000164109	MAD2L1	4085	MAD2 mitotic arrest deficient-like 1 (yeast) [Source:HGNC Symbol;Acc:HGNC:6763]	-2.85582760378497	3.97579305031321e-127	5.81820500014725e-125
ENSG00000135476	ESPL1	9700	extra spindle pole bodies homolog 1 (S. cerevisiae) [Source:HGNC Symbol;Acc:HGNC:16856]	-2.76055077602802	6.13806512970257e-127	8.91644225752971e-125
ENSG00000140525	FANCI	55215	Fanconi anemia, complementation group I [Source:HGNC Symbol;Acc:HGNC:25568]	-2.14999569832209	2.26696243069568e-126	3.26905910808933e-124
ENSG00000138182	KIF20B	9585	kinesin family member 20B [Source:HGNC Symbol;Acc:HGNC:7212]	-2.06316852796548	2.53786382666477e-126	3.63319114199922e-124
ENSG00000164104	HMGB2	3148	high mobility group box 2 [Source:HGNC Symbol;Acc:HGNC:5000]	-2.82895422961266	3.00647641641293e-126	4.27308979011899e-124
ENSG00000165480	SKA3	221150	spindle and kinetochore associated complex subunit 3 [Source:HGNC Symbol;Acc:HGNC:20262]	-3.49889500300783	4.48679546667006e-126	6.33150937425241e-124
ENSG00000146670	CDCA5	113130	cell division cycle associated 5 [Source:HGNC Symbol;Acc:HGNC:14626]	-3.00919195717763	1.61826636282497e-125	2.26740923857943e-123
ENSG00000068489	PRR11	55771	proline rich 11 [Source:HGNC Symbol;Acc:HGNC:25619]	-2.6777934516144	6.41807615057001e-125	8.92926143877896e-123
ENSG00000073111	MCM2	4171	minichromosome maintenance complex component 2 [Source:HGNC Symbol;Acc:HGNC:6944]	-2.60309720983074	2.70070037732664e-124	3.73112144436818e-122
ENSG00000127564	PKMYT1	9088	protein kinase, membrane associated tyrosine/threonine 1 [Source:HGNC Symbol;Acc:HGNC:29650]	-3.1343770176736	1.03457962708957e-123	1.41938577172094e-121
ENSG00000092853	CLSPN	63967	claspin [Source:HGNC Symbol;Acc:HGNC:19715]	-2.71218483886675	2.16229763291388e-123	2.94609324385148e-121
ENSG00000154839	SKA1	220134	spindle and kinetochore associated complex subunit 1 [Source:HGNC Symbol;Acc:HGNC:28109]	-3.30344096502871	3.30578876218221e-122	4.47323032778574e-120
ENSG00000123219	CENPK	64105	centromere protein K [Source:HGNC Symbol;Acc:HGNC:29479]	-2.48924797481855	4.35763629895471e-122	5.85642603552036e-120
ENSG00000100342	APOL1	8542	apolipoprotein L, 1 [Source:HGNC Symbol;Acc:HGNC:618]	3.05351437226549	4.60511727701551e-122	6.14720925167016e-120
ENSG00000163535	SGOL2	151246	shugoshin-like 2 (S. pombe) [Source:HGNC Symbol;Acc:HGNC:30812]	-2.35481372842606	7.58664208650834e-122	1.00591745678563e-119
ENSG00000007968	E2F2	1870	E2F transcription factor 2 [Source:HGNC Symbol;Acc:HGNC:3114]	-3.38768461261555	1.19712549264056e-121	1.5766940821738e-119
ENSG00000131747	TOP2A	7153	topoisomerase (DNA) II alpha 170kDa [Source:HGNC Symbol;Acc:HGNC:11989]	-2.84732599636682	1.42986473024327e-121	1.87075547090636e-119
ENSG00000158373	HIST1H2BD	3017	histone cluster 1, H2bd [Source:HGNC Symbol;Acc:HGNC:4747]	-2.55517207433694	1.99399233162385e-121	2.59166529628689e-119
ENSG00000164938	TP53INP1	94241	tumor protein p53 inducible nuclear protein 1 [Source:HGNC Symbol;Acc:HGNC:18022]	2.52477535543045	2.29042308888826e-121	2.95749010092003e-119
ENSG00000144452	ABCA12	26154	ATP-binding cassette, sub-family A (ABC1), member 12 [Source:HGNC Symbol;Acc:HGNC:14637]	2.87043554792082	3.62492085542681e-121	4.6502556116761e-119
ENSG00000165244	ZNF367	195828	zinc finger protein 367 [Source:HGNC Symbol;Acc:HGNC:18320]	-2.7165154814195	5.13630530581088e-121	6.54663533042579e-119
ENSG00000138092	CENPO	79172	centromere protein O [Source:HGNC Symbol;Acc:HGNC:28152]	-2.1424175827222	2.95487266630669e-120	3.74208105099712e-118
ENSG00000243649	CFB	629	complement factor B [Source:HGNC Symbol;Acc:HGNC:1037]	4.38066195438298	2.98264468733589e-120	3.7531928944591e-118
ENSG00000171848	RRM2	6241	ribonucleotide reductase M2 [Source:HGNC Symbol;Acc:HGNC:10452]	-3.08255531870127	1.22467192251693e-119	1.5313049684332e-117
ENSG00000087586	AURKA	6790	aurora kinase A [Source:HGNC Symbol;Acc:HGNC:11393]	-2.60590499655314	1.94882934250655e-119	2.42145110003518e-117
ENSG00000196747	HIST1H2AI	8329	histone cluster 1, H2ai [Source:HGNC Symbol;Acc:HGNC:4725]	-3.87595820212309	3.76723846690114e-119	4.65159769700619e-117
ENSG00000013810	TACC3	10460	transforming, acidic coiled-coil containing protein 3 [Source:HGNC Symbol;Acc:HGNC:11524]	-2.15386736488898	9.22553517136272e-119	1.1320476574251e-116
ENSG00000180596	HIST1H2BC	8347	histone cluster 1, H2bc [Source:HGNC Symbol;Acc:HGNC:4757]	-2.52949863900973	2.44135892788292e-118	2.97725228267006e-116
ENSG00000137807	KIF23	9493	kinesin family member 23 [Source:HGNC Symbol;Acc:HGNC:6392]	-2.27475348379828	3.56074380422561e-118	4.31570887093749e-116
ENSG00000080839	RBL1	5933	retinoblastoma-like 1 [Source:HGNC Symbol;Acc:HGNC:9893]	-2.0884650906874	4.09215898894626e-118	4.92955445034282e-116
ENSG00000168393	DTYMK	1841	deoxythymidylate kinase (thymidylate kinase) [Source:HGNC Symbol;Acc:HGNC:3061]	-2.47374921191135	1.46700141817415e-117	1.75648969802718e-115
ENSG00000177409	SAMD9L	219285	sterile alpha motif domain containing 9-like [Source:HGNC Symbol;Acc:HGNC:1349]	3.47264667089641	6.92496341381106e-117	8.24154079537658e-115
ENSG00000196562	SULF2	55959	sulfatase 2 [Source:HGNC Symbol;Acc:HGNC:20392]	2.30322067769064	9.2047664071233e-117	1.08891835412651e-114
ENSG00000163565	IFI16	3428	interferon, gamma-inducible protein 16 [Source:HGNC Symbol;Acc:HGNC:5395]	2.72158441579022	3.65369450772551e-116	4.29657075563246e-114
ENSG00000101412	E2F1	1869	E2F transcription factor 1 [Source:HGNC Symbol;Acc:HGNC:3113]	-2.44836490339986	1.20567252856434e-115	1.40942405173474e-113
ENSG00000137310	TCF19	6941	transcription factor 19 [Source:HGNC Symbol;Acc:HGNC:11629]	-2.9574309147767	2.88823290474009e-115	3.35646642741443e-113
ENSG00000148773	MKI67	4288	marker of proliferation Ki-67 [Source:HGNC Symbol;Acc:HGNC:7107]	-2.68775595051312	3.17675742259465e-115	3.67017658718011e-113
ENSG00000136982	DSCC1	79075	DNA replication and sister chromatid cohesion 1 [Source:HGNC Symbol;Acc:HGNC:24453]	-3.08018607395971	8.8724536392605e-115	1.01909415172808e-112
ENSG00000271503	CCL5	6352	chemokine (C-C motif) ligand 5 [Source:HGNC Symbol;Acc:HGNC:10632]	7.04402780791656	1.22826570408854e-114	1.40263683525857e-112
ENSG00000125730	C3	718	complement component 3 [Source:HGNC Symbol;Acc:HGNC:1318]	3.17820302905506	4.60388926498364e-114	5.2272664551159e-112
ENSG00000161800	RACGAP1	29127	Rac GTPase activating protein 1 [Source:HGNC Symbol;Acc:HGNC:9804]	-2.34479297306444	6.10604065522755e-114	6.8931965248386e-112
ENSG00000183856	IQGAP3	128239	IQ motif containing GTPase activating protein 3 [Source:HGNC Symbol;Acc:HGNC:20669]	-2.07931566823359	2.60699171374775e-113	2.92634819868185e-111
ENSG00000129195	FAM64A	54478	family with sequence similarity 64, member A [Source:HGNC Symbol;Acc:HGNC:25483]	-3.36856302805861	2.35972179581045e-112	2.6338228134481e-110
ENSG00000012171	SEMA3B	7869	sema domain, immunoglobulin domain (Ig), short basic domain, secreted, (semaphorin) 3B [Source:HGNC Symbol;Acc:HGNC:10724]	2.43684620719344	8.55562399733108e-112	9.49578133097038e-110
ENSG00000166451	CENPN	55839	centromere protein N [Source:HGNC Symbol;Acc:HGNC:30873]	-2.49708566627541	9.007352276226e-112	9.94129897034195e-110
ENSG00000119969	HELLS	3070	helicase, lymphoid-specific [Source:HGNC Symbol;Acc:HGNC:4861]	-1.90702957486123	1.55792300210895e-111	1.70990704609247e-109
ENSG00000113810	SMC4	10051	structural maintenance of chromosomes 4 [Source:HGNC Symbol;Acc:HGNC:14013]	-2.03623384661555	3.77714615944605e-111	4.12272373071913e-109
ENSG00000100526	CDKN3	1033	cyclin-dependent kinase inhibitor 3 [Source:HGNC Symbol;Acc:HGNC:1791]	-2.65650205262207	5.63365359494933e-110	6.11530002317686e-108
ENSG00000149503	INCENP	3619	inner centromere protein antigens 135/155kDa [Source:HGNC Symbol;Acc:HGNC:6058]	-2.12084233686122	1.57859976659917e-109	1.70419764966848e-107
ENSG00000185507	IRF7	3665	interferon regulatory factor 7 [Source:HGNC Symbol;Acc:HGNC:6122]	3.93478366527497	1.84363228952573e-109	1.97949997347121e-107
ENSG00000160957	RECQL4	9401	RecQ protein-like 4 [Source:HGNC Symbol;Acc:HGNC:9949]	-2.29472548496927	2.866103238096e-109	3.06068840928782e-107
ENSG00000124635	HIST1H2BJ	8970	histone cluster 1, H2bj [Source:HGNC Symbol;Acc:HGNC:4761]	-3.45631322750326	4.90100848855768e-109	5.20560880107234e-107
ENSG00000215784	FAM72D	728833	family with sequence similarity 72, member D [Source:HGNC Symbol;Acc:HGNC:33593]	-2.45263410422447	3.44875375169404e-108	3.64350690473088e-106
ENSG00000244255		NA	Uncharacterized protein; cDNA FLJ55673, highly similar to Complement factor B (EC 3.4.21.47) [Source:UniProtKB/TrEMBL;Acc:B4E1Z4]	4.23417085417066	5.20630729218944e-108	5.47105355662205e-106
ENSG00000278588	HIST1H2BI	8346	histone cluster 1, H2bi [Source:HGNC Symbol;Acc:HGNC:4756]	-3.90657666237729	1.49445823674853e-107	1.5621437526563e-105
ENSG00000163071	SPATA18	132671	spermatogenesis associated 18 [Source:HGNC Symbol;Acc:HGNC:29579]	2.61819154377004	2.2670396736301e-107	2.35724398906506e-105
ENSG00000120802	TMPO	7112	thymopoietin [Source:HGNC Symbol;Acc:HGNC:11875]	-2.17432176308559	2.95302042494727e-106	3.05444353483028e-104
ENSG00000203852	HIST2H3A	333932	histone cluster 2, H3a [Source:HGNC Symbol;Acc:HGNC:20505]	-4.04323488676613	3.32216213157285e-106	3.41836640996631e-104
ENSG00000078018	MAP2	4133	microtubule-associated protein 2 [Source:HGNC Symbol;Acc:HGNC:6839]	3.64064019214545	3.83376472988227e-106	3.92434487065047e-104
ENSG00000213626	LBH	81606	limb bud and heart development [Source:HGNC Symbol;Acc:HGNC:29532]	2.18610331205019	3.89460504877361e-106	3.96607305894699e-104
ENSG00000136881	BAAT	570	bile acid CoA:amino acid N-acyltransferase [Source:HGNC Symbol;Acc:HGNC:932]	2.5655175159872	5.9654031600725e-106	6.04371819643038e-104
ENSG00000123975	CKS2	1164	CDC28 protein kinase regulatory subunit 2 [Source:HGNC Symbol;Acc:HGNC:2000]	-2.19036608292522	6.41037548179602e-106	6.46139683767154e-104
ENSG00000276368	HIST1H2AJ	8331	histone cluster 1, H2aj [Source:HGNC Symbol;Acc:HGNC:4727]	-3.83611240710006	6.61750595013772e-105	6.63631713456451e-103
ENSG00000121621	KIF18A	81930	kinesin family member 18A [Source:HGNC Symbol;Acc:HGNC:29441]	-1.97007090001472	1.61157491430991e-104	1.60799363672255e-102
ENSG00000278637	HIST1H4A	8359	histone cluster 1, H4a [Source:HGNC Symbol;Acc:HGNC:4781]	-3.70374032674955	1.7083327598671e-104	1.69597095497158e-102
ENSG00000107796	ACTA2	59	actin, alpha 2, smooth muscle, aorta [Source:HGNC Symbol;Acc:HGNC:130]	2.62515713374257	1.86167757414971e-104	1.83896510774509e-102
ENSG00000162063	CCNF	899	cyclin F [Source:HGNC Symbol;Acc:HGNC:1591]	-2.39640756091599	3.82184585282912e-104	3.75643714768617e-102
ENSG00000177084	POLE	5426	polymerase (DNA directed), epsilon, catalytic subunit [Source:HGNC Symbol;Acc:HGNC:9177]	-1.91765150303188	5.64892963544971e-104	5.52476504346259e-102
ENSG00000140678	ITGAX	3687	integrin, alpha X (complement component 3 receptor 4 subunit) [Source:HGNC Symbol;Acc:HGNC:6152]	3.49236007356626	1.083400276629e-103	1.05436728399422e-101
ENSG00000275714	HIST1H3A	8350	histone cluster 1, H3a [Source:HGNC Symbol;Acc:HGNC:4766]	-3.07127605310934	1.29685317978308e-103	1.25591330489189e-101
ENSG00000140451	PIF1	80119	PIF1 5'-to-3' DNA helicase [Source:HGNC Symbol;Acc:HGNC:26220]	-3.17968362727266	1.86216274519598e-103	1.79457986312643e-101
ENSG00000198554	WDHD1	11169	WD repeat and HMG-box DNA binding protein 1 [Source:HGNC Symbol;Acc:HGNC:23170]	-2.07832863019556	9.4198773695142e-103	9.03393676272439e-101
ENSG00000138346	DNA2	1763	DNA replication helicase/nuclease 2 [Source:HGNC Symbol;Acc:HGNC:2939]	-2.09070936246272	2.84254966032883e-102	2.71291841011867e-100
ENSG00000123485	HJURP	55355	Holliday junction recognition protein [Source:HGNC Symbol;Acc:HGNC:25444]	-2.46784235922762	3.28333725052362e-102	3.11853897698773e-100
ENSG00000147536	GINS4	84296	GINS complex subunit 4 (Sld5 homolog) [Source:HGNC Symbol;Acc:HGNC:28226]	-2.1499818998494	4.85209546146465e-102	4.58650707831079e-100
ENSG00000109452	INPP4B	8821	inositol polyphosphate-4-phosphatase, type II, 105kDa [Source:HGNC Symbol;Acc:HGNC:6075]	2.20738210348228	1.46118994991454e-101	1.37463184050055e-99
ENSG00000213928	IRF9	10379	interferon regulatory factor 9 [Source:HGNC Symbol;Acc:HGNC:6131]	2.2309735016879	2.60112334855771e-101	2.43544042057375e-99
ENSG00000129173	E2F8	79733	E2F transcription factor 8 [Source:HGNC Symbol;Acc:HGNC:24727]	-3.60115284214037	1.17137264400586e-100	1.09158669598961e-98
ENSG00000276043	UHRF1	29128	ubiquitin-like with PHD and ring finger domains 1 [Source:HGNC Symbol;Acc:HGNC:12556]	-2.26621225275951	1.4089869087961e-100	1.30685189531341e-98
ENSG00000159403	C1R	715	complement component 1, r subcomponent [Source:HGNC Symbol;Acc:HGNC:1246]	2.29264418223134	1.8507545155087e-100	1.70857505646681e-98
ENSG00000198959	TGM2	7052	transglutaminase 2 [Source:HGNC Symbol;Acc:HGNC:11778]	2.08856994725504	5.82384223487092e-100	5.35143382288884e-98
ENSG00000256664		NA		1.92079290277876	2.55485028913107e-99	2.3367417737071e-97
ENSG00000187741	FANCA	2175	Fanconi anemia, complementation group A [Source:HGNC Symbol;Acc:HGNC:3582]	-2.20073609374456	4.00213533802186e-99	3.64360302939907e-97
ENSG00000164032	H2AFZ	3015	H2A histone family, member Z [Source:HGNC Symbol;Acc:HGNC:4741]	-2.20339761341775	1.24132339742725e-98	1.12493509355839e-96
ENSG00000143815	LBR	3930	lamin B receptor [Source:HGNC Symbol;Acc:HGNC:6518]	-1.7752660381487	1.8831351072538e-98	1.6987770401327e-96
ENSG00000143344	RGL1	23179	ral guanine nucleotide dissociation stimulator-like 1 [Source:HGNC Symbol;Acc:HGNC:30281]	2.38138558691724	1.90369344055743e-98	1.70951670962057e-96
ENSG00000115267	IFIH1	64135	interferon induced with helicase C domain 1 [Source:HGNC Symbol;Acc:HGNC:18873]	3.10315163280919	3.58512678895104e-98	3.20487623721795e-96
ENSG00000159388	BTG2	7832	BTG family, member 2 [Source:HGNC Symbol;Acc:HGNC:1131]	2.12295554159649	2.48143781568142e-97	2.2082561030001e-95
ENSG00000130589	HELZ2	85441	helicase with zinc finger 2, transcriptional coactivator [Source:HGNC Symbol;Acc:HGNC:30021]	2.8093174998359	5.94148367552639e-97	5.26367495487441e-95
ENSG00000277775	HIST1H3F	8968	histone cluster 1, H3f [Source:HGNC Symbol;Acc:HGNC:4773]	-3.68519651640618	7.40110561691953e-97	6.52751082892242e-95
ENSG00000101003	GINS1	9837	GINS complex subunit 1 (Psf1 homolog) [Source:HGNC Symbol;Acc:HGNC:28980]	-2.22430856861384	1.14019234406694e-96	1.00113955330606e-94
ENSG00000167513	CDT1	81620	chromatin licensing and DNA replication factor 1 [Source:HGNC Symbol;Acc:HGNC:24576]	-2.91018152972965	1.39162957170746e-96	1.21650592117932e-94
ENSG00000136492	BRIP1	83990	BRCA1 interacting protein C-terminal helicase 1 [Source:HGNC Symbol;Acc:HGNC:20473]	-2.1029355573626	2.05173091454491e-96	1.78563858800657e-94
ENSG00000158406	HIST1H4H	8365	histone cluster 1, H4h [Source:HGNC Symbol;Acc:HGNC:4788]	-2.94704255583246	3.58917864999629e-96	3.10999181619854e-94
ENSG00000108106	UBE2S	27338	ubiquitin-conjugating enzyme E2S [Source:HGNC Symbol;Acc:HGNC:17895]	-2.33591300654383	3.7904776807977e-96	3.27007323414146e-94
ENSG00000121957	GPSM2	29899	G-protein signaling modulator 2 [Source:HGNC Symbol;Acc:HGNC:29501]	-2.391007167101	4.11214192988699e-96	3.53215112899336e-94
ENSG00000174442	ZWILCH	55055	zwilch kinetochore protein [Source:HGNC Symbol;Acc:HGNC:25468]	-2.03337899606837	1.55148049305698e-95	1.32688522168111e-93
ENSG00000275379	HIST1H3I	8354	histone cluster 1, H3i [Source:HGNC Symbol;Acc:HGNC:4771]	-3.40669497397048	4.88850868205451e-95	4.16281799666676e-93
ENSG00000050165	DKK3	27122	dickkopf WNT signaling pathway inhibitor 3 [Source:HGNC Symbol;Acc:HGNC:2893]	2.07846195507279	6.47422458231606e-95	5.48947557288567e-93
ENSG00000265962	GACAT2	100287082	gastric cancer associated transcript 2 (non-protein coding) [Source:HGNC Symbol;Acc:HGNC:50516]	2.27913082183912	9.95408822336255e-95	8.40397294618592e-93
ENSG00000125885	MCM8	84515	minichromosome maintenance complex component 8 [Source:HGNC Symbol;Acc:HGNC:16147]	-1.72013860197051	1.18846610747682e-94	9.99120698694133e-93
ENSG00000133119	RFC3	5983	replication factor C (activator 1) 3, 38kDa [Source:HGNC Symbol;Acc:HGNC:9971]	-2.20682901039295	2.43968779909965e-94	2.04230814233104e-92
ENSG00000168496	FEN1	2237	flap structure-specific endonuclease 1 [Source:HGNC Symbol;Acc:HGNC:3650]	-2.33033765050123	2.82881690342212e-94	2.35806357569652e-92
ENSG00000184445	KNTC1	9735	kinetochore associated 1 [Source:HGNC Symbol;Acc:HGNC:17255]	-1.85315823808538	5.54904520273669e-94	4.60617382459101e-92
ENSG00000163840	DTX3L	151636	deltex 3 like, E3 ubiquitin ligase [Source:HGNC Symbol;Acc:HGNC:30323]	1.87865758920599	1.36722586142737e-93	1.13016377064264e-91
ENSG00000185480	PARPBP	55010	PARP1 binding protein [Source:HGNC Symbol;Acc:HGNC:26074]	-2.13830053400938	1.42243460981626e-93	1.17090075631375e-91
ENSG00000163453	IGFBP7	3490	insulin-like growth factor binding protein 7 [Source:HGNC Symbol;Acc:HGNC:5476]	2.09062761022876	3.5298920402891e-93	2.89363266174073e-91
ENSG00000091651	ORC6	23594	origin recognition complex, subunit 6 [Source:HGNC Symbol;Acc:HGNC:17151]	-2.38357507510172	3.63496562385412e-93	2.96745375474636e-91
ENSG00000153029	MR1	3140	major histocompatibility complex, class I-related [Source:HGNC Symbol;Acc:HGNC:4975]	2.02962026207017	3.74849765563813e-93	3.04754401995008e-91
ENSG00000181544	FANCB	2187	Fanconi anemia, complementation group B [Source:HGNC Symbol;Acc:HGNC:3583]	-2.62654093460545	4.23562405957249e-93	3.42946675905386e-91
ENSG00000077152	UBE2T	29089	ubiquitin-conjugating enzyme E2T [Source:HGNC Symbol;Acc:HGNC:25009]	-2.25829097522218	5.84097984665471e-93	4.70997542246982e-91
ENSG00000167670	CHAF1A	10036	chromatin assembly factor 1, subunit A (p150) [Source:HGNC Symbol;Acc:HGNC:1910]	-2.42773549722191	9.30317719409762e-93	7.47128327831677e-91
ENSG00000152253	SPC25	57405	SPC25, NDC80 kinetochore complex component [Source:HGNC Symbol;Acc:HGNC:24031]	-3.34958850840988	1.08933233291926e-92	8.71289456241009e-91
ENSG00000058804	NDC1	55706	NDC1 transmembrane nucleoporin [Source:HGNC Symbol;Acc:HGNC:25525]	-1.82637519523957	2.26142119847991e-92	1.80147730633747e-90
ENSG00000010292	NCAPD2	9918	non-SMC condensin I complex, subunit D2 [Source:HGNC Symbol;Acc:HGNC:24305]	-1.95575177002763	4.53563116602209e-92	3.59863169943504e-90
ENSG00000100479	POLE2	5427	polymerase (DNA directed), epsilon 2, accessory subunit [Source:HGNC Symbol;Acc:HGNC:9178]	-3.17690910295552	5.24969634508107e-92	4.14852003973686e-90
ENSG00000076003	MCM6	4175	minichromosome maintenance complex component 6 [Source:HGNC Symbol;Acc:HGNC:6949]	-2.27944229245346	5.89806464434865e-92	4.64231733520924e-90
ENSG00000111602	TIMELESS	8914	timeless circadian clock [Source:HGNC Symbol;Acc:HGNC:11813]	-1.75434091575706	5.95964629785588e-92	4.67217350239844e-90
ENSG00000119681	LTBP2	4053	latent transforming growth factor beta binding protein 2 [Source:HGNC Symbol;Acc:HGNC:6715]	2.4302698131653	1.14102370679467e-91	8.90990685827489e-90
ENSG00000126215	XRCC3	7517	X-ray repair complementing defective repair in Chinese hamster cells 3 [Source:HGNC Symbol;Acc:HGNC:12830]	-2.2143040431414	2.18682963160502e-90	1.70090575598381e-88
ENSG00000151503	NCAPD3	23310	non-SMC condensin II complex, subunit D3 [Source:HGNC Symbol;Acc:HGNC:28952]	-1.81205514242344	2.86251243787757e-90	2.21771747932193e-88
ENSG00000178685	PARP10	84875	poly (ADP-ribose) polymerase family, member 10 [Source:HGNC Symbol;Acc:HGNC:25895]	3.55384567984879	3.94037181841309e-90	3.04085881424097e-88
ENSG00000221829	FANCG	2189	Fanconi anemia, complementation group G [Source:HGNC Symbol;Acc:HGNC:3588]	-1.86767111348516	4.91719156973055e-90	3.7799236051205e-88
ENSG00000123473	STIL	6491	SCL/TAL1 interrupting locus [Source:HGNC Symbol;Acc:HGNC:10879]	-2.07861344835103	1.15870823117237e-89	8.87265109110128e-88
ENSG00000139354	GAS2L3	283431	growth arrest-specific 2 like 3 [Source:HGNC Symbol;Acc:HGNC:27475]	-2.22741710082571	1.46346566222578e-89	1.11317020677759e-87
ENSG00000006634	DBF4	10926	DBF4 zinc finger [Source:HGNC Symbol;Acc:HGNC:17364]	-2.11411171632704	1.46499419802679e-89	1.11317020677759e-87
ENSG00000172667	ZMAT3	64393	zinc finger, matrin-type 3 [Source:HGNC Symbol;Acc:HGNC:29983]	1.78886001978225	1.77340115793845e-89	1.34234916767172e-87
ENSG00000051180	RAD51	5888	RAD51 recombinase [Source:HGNC Symbol;Acc:HGNC:9817]	-3.08590705619808	1.87576041595404e-89	1.41440926632016e-87
ENSG00000138642	HERC6	55008	HECT and RLD domain containing E3 ubiquitin protein ligase family member 6 [Source:HGNC Symbol;Acc:HGNC:26072]	2.00723527115415	2.31529981345705e-89	1.73920392070941e-87
ENSG00000278705	HIST1H4B	8366	histone cluster 1, H4b [Source:HGNC Symbol;Acc:HGNC:4789]	-2.97347858374069	3.41781985340704e-89	2.55766852363294e-87
ENSG00000167325	RRM1	6240	ribonucleotide reductase M1 [Source:HGNC Symbol;Acc:HGNC:10451]	-1.82153516339247	5.21476933045289e-89	3.88765973178971e-87
ENSG00000100629	CEP128	145508	centrosomal protein 128kDa [Source:HGNC Symbol;Acc:HGNC:20359]	-2.29808954303701	1.91563469012977e-88	1.42275484730089e-86
ENSG00000065357	DGKA	1606	diacylglycerol kinase, alpha 80kDa [Source:HGNC Symbol;Acc:HGNC:2849]	2.58464283519671	3.95857189933785e-88	2.92904668327036e-86
ENSG00000146263	MMS22L	253714	MMS22-like, DNA repair protein [Source:HGNC Symbol;Acc:HGNC:21475]	-1.83848717380602	4.58503897196202e-88	3.37992648992842e-86
ENSG00000169213	RAB3B	5865	RAB3B, member RAS oncogene family [Source:HGNC Symbol;Acc:HGNC:9778]	1.9451631993548	2.24440608128971e-87	1.64834522460816e-85
ENSG00000162607	USP1	7398	ubiquitin specific peptidase 1 [Source:HGNC Symbol;Acc:HGNC:12607]	-1.85457068560346	2.69774576996193e-87	1.97395057153214e-85
ENSG00000164125	FAM198B	51313	family with sequence similarity 198, member B [Source:HGNC Symbol;Acc:HGNC:25312]	2.39889171055185	1.1944673606788e-86	8.70771113563482e-85
ENSG00000276903	HIST1H2AL	8332	histone cluster 1, H2al [Source:HGNC Symbol;Acc:HGNC:4730]	-4.18787675035291	2.13228877916361e-86	1.54873151180722e-84
ENSG00000138376	BARD1	580	BRCA1 associated RING domain 1 [Source:HGNC Symbol;Acc:HGNC:952]	-2.03887719119568	2.25787083429034e-86	1.63393758982564e-84
ENSG00000113361	CDH6	1004	cadherin 6, type 2, K-cadherin (fetal kidney) [Source:HGNC Symbol;Acc:HGNC:1765]	2.77390098518779	2.27973329268581e-86	1.64373762519347e-84
ENSG00000154920	EME1	146956	essential meiotic structure-specific endonuclease 1 [Source:HGNC Symbol;Acc:HGNC:24965]	-2.40775069388288	2.71386483983078e-86	1.94964050093443e-84
ENSG00000163918	RFC4	5984	replication factor C (activator 1) 4, 37kDa [Source:HGNC Symbol;Acc:HGNC:9972]	-2.20451225859451	5.59213192879206e-86	4.0028318255513e-84
ENSG00000104738	MCM4	4173	minichromosome maintenance complex component 4 [Source:HGNC Symbol;Acc:HGNC:6947]	-2.06987725671775	6.28151080556229e-86	4.48005514349056e-84
ENSG00000136824	SMC2	10592	structural maintenance of chromosomes 2 [Source:HGNC Symbol;Acc:HGNC:14011]	-1.73035744698535	6.93174349041628e-86	4.92602605743396e-84
ENSG00000177602	GSG2	83903	germ cell associated 2 (haspin) [Source:HGNC Symbol;Acc:HGNC:19682]	-2.75629163081467	1.02066153687586e-85	7.22730800090301e-84
ENSG00000221963	APOL6	80830	apolipoprotein L, 6 [Source:HGNC Symbol;Acc:HGNC:14870]	1.76072528717076	1.21861883154757e-85	8.59822629859063e-84
ENSG00000070669	ASNS	440	asparagine synthetase (glutamine-hydrolyzing) [Source:HGNC Symbol;Acc:HGNC:753]	-1.79813073990205	1.88426038121548e-85	1.32474904239477e-83
ENSG00000136378	ADAMTS7	11173	ADAM metallopeptidase with thrombospondin type 1 motif, 7 [Source:HGNC Symbol;Acc:HGNC:223]	3.03756659334944	1.32533242495819e-83	9.28484659130283e-82
ENSG00000186193	SAPCD2	89958	suppressor APC domain containing 2 [Source:HGNC Symbol;Acc:HGNC:28055]	-2.79770635921831	4.3343492046925e-83	3.02577395363622e-81
ENSG00000112029	FBXO5	26271	F-box protein 5 [Source:HGNC Symbol;Acc:HGNC:13584]	-2.40111895475461	1.65415839493666e-82	1.15068849473129e-80
ENSG00000275221	HIST1H2AK	8330	histone cluster 1, H2ak [Source:HGNC Symbol;Acc:HGNC:4726]	-3.19891857712159	4.54856195805586e-82	3.15303122959128e-80
ENSG00000231607	DLEU2	NA	deleted in lymphocytic leukemia 2 (non-protein coding) [Source:HGNC Symbol;Acc:HGNC:13748]	-2.75480591459012	6.75104680202502e-82	4.6634154063219e-80
ENSG00000120539	MASTL	84930	microtubule associated serine/threonine kinase-like [Source:HGNC Symbol;Acc:HGNC:19042]	-1.82917019361429	2.49922689479049e-81	1.72037374681118e-79
ENSG00000182326	C1S	716	complement component 1, s subcomponent [Source:HGNC Symbol;Acc:HGNC:1247]	1.97334430118111	3.89539177377409e-81	2.67213055148198e-79
ENSG00000170581	STAT2	6773	signal transducer and activator of transcription 2, 113kDa [Source:HGNC Symbol;Acc:HGNC:11363]	2.03854153119206	4.14907349151679e-81	2.83630089613861e-79
ENSG00000132436	FIGNL1	63979	fidgetin-like 1 [Source:HGNC Symbol;Acc:HGNC:13286]	-2.05575423512319	4.41398157717425e-81	3.00698689788464e-79
ENSG00000019505	SYT13	57586	synaptotagmin XIII [Source:HGNC Symbol;Acc:HGNC:14962]	1.82877806050225	4.76696221895693e-81	3.2362922885812e-79
ENSG00000065325	GLP2R	9340	glucagon-like peptide 2 receptor [Source:HGNC Symbol;Acc:HGNC:4325]	1.87520688670786	5.76133769873588e-81	3.89797902658308e-79
ENSG00000101868	POLA1	5422	polymerase (DNA directed), alpha 1, catalytic subunit [Source:HGNC Symbol;Acc:HGNC:9173]	-1.64153164652007	9.36800409224966e-81	6.31652862957284e-79
ENSG00000129226	CD68	968	CD68 molecule [Source:HGNC Symbol;Acc:HGNC:1693]	2.0899128129583	7.09190074922105e-80	4.76556432658541e-78
ENSG00000092621	PHGDH	26227	phosphoglycerate dehydrogenase [Source:HGNC Symbol;Acc:HGNC:8923]	-1.91205814136925	1.57717933222813e-79	1.05622897923725e-77
ENSG00000080986	NDC80	10403	NDC80 kinetochore complex component [Source:HGNC Symbol;Acc:HGNC:16909]	-2.39460443156277	1.21022368062778e-78	8.07742534948727e-77
ENSG00000277157	HIST1H4D	8360	histone cluster 1, H4d [Source:HGNC Symbol;Acc:HGNC:4782]	-3.43176235920739	2.0465524120537e-78	1.36133634520313e-76
ENSG00000184678	HIST2H2BE	8349	histone cluster 2, H2be [Source:HGNC Symbol;Acc:HGNC:4760]	-2.44911979397397	2.16677300554754e-78	1.43646870797306e-76
ENSG00000161692	DBF4B	80174	DBF4 zinc finger B [Source:HGNC Symbol;Acc:HGNC:17883]	-2.00895187936793	2.44587751475573e-78	1.61607880205733e-76
ENSG00000203811	HIST2H3C	126961	histone cluster 2, H3c [Source:HGNC Symbol;Acc:HGNC:20503]	-4.36208706814614	3.15244982726414e-78	2.07599329291434e-76
ENSG00000132530	XAF1	54739	XIAP associated factor 1 [Source:HGNC Symbol;Acc:HGNC:30932]	5.79887162352667	4.6814671852135e-78	3.07265999040126e-76
ENSG00000164045	CDC25A	993	cell division cycle 25A [Source:HGNC Symbol;Acc:HGNC:1725]	-2.42562236188565	6.68340835956136e-78	4.37209985269849e-76
ENSG00000127586	CHTF18	63922	CTF18, chromosome transmission fidelity factor 18 homolog (S. cerevisiae) [Source:HGNC Symbol;Acc:HGNC:18435]	-2.0735632009846	8.38710592010213e-78	5.46850378077682e-76
ENSG00000117632	STMN1	3925	stathmin 1 [Source:HGNC Symbol;Acc:HGNC:6510]	-1.89930105792408	9.04633188276496e-78	5.87892541697055e-76
ENSG00000106462	EZH2	2146	enhancer of zeste 2 polycomb repressive complex 2 subunit [Source:HGNC Symbol;Acc:HGNC:3527]	-1.82660388475868	1.59849008400975e-77	1.03540229835071e-75
ENSG00000156876	SASS6	163786	spindle assembly 6 homolog (C. elegans) [Source:HGNC Symbol;Acc:HGNC:25403]	-2.14699522463282	2.69534475992358e-77	1.7401709502304e-75
ENSG00000108679	LGALS3BP	3959	lectin, galactoside-binding, soluble, 3 binding protein [Source:HGNC Symbol;Acc:HGNC:6564]	1.88390556374512	3.06061607624166e-77	1.96956127694561e-75
ENSG00000119403	PHF19	26147	PHD finger protein 19 [Source:HGNC Symbol;Acc:HGNC:24566]	-1.8021890365148	8.68155797740093e-77	5.5685993312186e-75
ENSG00000100162	CENPM	79019	centromere protein M [Source:HGNC Symbol;Acc:HGNC:18352]	-2.86285091641689	1.54268856109908e-76	9.8632217518037e-75
ENSG00000149636	DSN1	79980	DSN1, MIS12 kinetochore complex component [Source:HGNC Symbol;Acc:HGNC:16165]	-2.06308921353295	1.9690014338764e-76	1.25482555895684e-74
ENSG00000146859	TMEM140	55281	transmembrane protein 140 [Source:HGNC Symbol;Acc:HGNC:21870]	3.57613564060752	2.73000445942817e-76	1.73421119294093e-74
ENSG00000189057	FAM111B	374393	family with sequence similarity 111, member B [Source:HGNC Symbol;Acc:HGNC:24200]	-2.56009171077172	4.03405337828643e-76	2.55438328658419e-74
ENSG00000124766	SOX4	6659	SRY (sex determining region Y)-box 4 [Source:HGNC Symbol;Acc:HGNC:11200]	1.6488380956321	9.1267875278533e-76	5.76066499681373e-74
ENSG00000109072	VTN	7448	vitronectin [Source:HGNC Symbol;Acc:HGNC:12724]	2.10233555883007	1.62283864448316e-75	1.02104459428055e-73
ENSG00000085999	RAD54L	8438	RAD54-like (S. cerevisiae) [Source:HGNC Symbol;Acc:HGNC:9826]	-2.94432079192878	1.63798043622175e-75	1.02729973009514e-73
ENSG00000238045	PAGR1	NA	PAXIP1 associated glutamate-rich protein 1 [Source:HGNC Symbol;Acc:HGNC:28707]	2.6130834984807	2.57976853745977e-75	1.6128451653815e-73
ENSG00000132470	ITGB4	3691	integrin, beta 4 [Source:HGNC Symbol;Acc:HGNC:6158]	1.5996517994888	1.17229691808632e-74	7.3059614869758e-73
ENSG00000123374	CDK2	1017	cyclin-dependent kinase 2 [Source:HGNC Symbol;Acc:HGNC:1771]	-1.70275834547361	1.59702858446771e-74	9.92166563356734e-73
ENSG00000183684	ALYREF	10189	Aly/REF export factor [Source:HGNC Symbol;Acc:HGNC:19071]	-1.7626028855424	1.86064978435588e-74	1.15231965955281e-72
ENSG00000168298	HIST1H1E	3008	histone cluster 1, H1e [Source:HGNC Symbol;Acc:HGNC:4718]	-2.55914800607831	2.63966740829416e-74	1.62966466619561e-72
ENSG00000124201	ZNFX1	57169	zinc finger, NFX1-type containing 1 [Source:HGNC Symbol;Acc:HGNC:29271]	1.72983784393458	3.30438463337939e-74	2.03368918433157e-72
ENSG00000137563	GGH	8836	gamma-glutamyl hydrolase (conjugase, folylpolygammaglutamyl hydrolase) [Source:HGNC Symbol;Acc:HGNC:4248]	-1.76414244069579	2.78931045061398e-73	1.71135457336428e-71
ENSG00000258472		NA	Uncharacterized protein [Source:UniProtKB/TrEMBL;Acc:J3KTE0]	-1.87175471778332	4.41794030759395e-73	2.70219283953022e-71
ENSG00000179715	PCED1B	91523	PC-esterase domain containing 1B [Source:HGNC Symbol;Acc:HGNC:28255]	1.72187791346253	5.69256548849851e-73	3.47105937625854e-71
ENSG00000106399	RPA3	6119	replication protein A3, 14kDa [Source:HGNC Symbol;Acc:HGNC:10291]	-1.76887540644221	8.04621791405161e-73	4.89111018800011e-71
ENSG00000197903	HIST1H2BK	85236	histone cluster 1, H2bk [Source:HGNC Symbol;Acc:HGNC:13954]	-2.55847648977116	1.76937511285501e-72	1.07226302851422e-70
ENSG00000143401	ANP32E	81611	acidic (leucine-rich) nuclear phosphoprotein 32 family, member E [Source:HGNC Symbol;Acc:HGNC:16673]	-1.81618303921604	3.20423193141453e-72	1.93586562804359e-70
ENSG00000152455	SUV39H2	79723	suppressor of variegation 3-9 homolog 2 (Drosophila) [Source:HGNC Symbol;Acc:HGNC:17287]	-1.83040455947113	3.76508597847153e-72	2.26777556678913e-70
ENSG00000100749	VRK1	7443	vaccinia related kinase 1 [Source:HGNC Symbol;Acc:HGNC:12718]	-1.81341703550009	4.41312317981528e-72	2.65002010761187e-70
ENSG00000166750	SLFN5	162394	schlafen family member 5 [Source:HGNC Symbol;Acc:HGNC:28286]	1.64305956322612	5.05884285701349e-72	3.02856059039874e-70
ENSG00000128708	HAT1	8520	histone acetyltransferase 1 [Source:HGNC Symbol;Acc:HGNC:4821]	-1.60940814750937	8.60738882920189e-72	5.13738893382817e-70
ENSG00000165029	ABCA1	19	ATP-binding cassette, sub-family A (ABC1), member 1 [Source:HGNC Symbol;Acc:HGNC:29]	2.46886183929914	1.2147100589269e-71	7.22825660366261e-70
ENSG00000059378	PARP12	64761	poly (ADP-ribose) polymerase family, member 12 [Source:HGNC Symbol;Acc:HGNC:21919]	1.90268010745359	1.8290161836115e-71	1.08510641812098e-69
ENSG00000182752	PAPPA	5069	pregnancy-associated plasma protein A, pappalysin 1 [Source:HGNC Symbol;Acc:HGNC:8602]	2.37568303180719	3.90719425928655e-71	2.31109370618159e-69
ENSG00000166881	NEMP1	23306	nuclear envelope integral membrane protein 1 [Source:HGNC Symbol;Acc:HGNC:29001]	-1.65714494142308	5.69279628940307e-71	3.35722040278947e-69
ENSG00000165323	FAT3	120114	FAT atypical cadherin 3 [Source:HGNC Symbol;Acc:HGNC:23112]	1.98283091896109	3.44727668577093e-70	2.02691661321698e-68
ENSG00000089127	OAS1	4938	2'-5'-oligoadenylate synthetase 1, 40/46kDa [Source:HGNC Symbol;Acc:HGNC:8086]	2.04878516752064	5.03238269391933e-70	2.95014102377063e-68
ENSG00000167747	C19orf48	84798	chromosome 19 open reading frame 48 [Source:HGNC Symbol;Acc:HGNC:29667]	-1.49247040822496	5.11519991316504e-70	2.98981921551741e-68
ENSG00000165949	IFI27	3429	interferon, alpha-inducible protein 27 [Source:HGNC Symbol;Acc:HGNC:5397]	3.89123529793405	5.68714443121686e-70	3.31431343313039e-68
ENSG00000112118	MCM3	4172	minichromosome maintenance complex component 3 [Source:HGNC Symbol;Acc:HGNC:6945]	-1.73368294462871	6.42977023045522e-70	3.73607472567275e-68
ENSG00000123384	LRP1	4035	low density lipoprotein receptor-related protein 1 [Source:HGNC Symbol;Acc:HGNC:6692]	2.4243310884842	6.46858707899763e-70	3.74760722383218e-68
ENSG00000131470	PSMC3IP	29893	PSMC3 interacting protein [Source:HGNC Symbol;Acc:HGNC:17928]	-2.32582988529457	1.75457695137995e-69	1.01355035822989e-67
ENSG00000114346	ECT2	1894	epithelial cell transforming 2 [Source:HGNC Symbol;Acc:HGNC:3155]	-1.70320936911619	2.72047669358537e-69	1.56693112415372e-67
ENSG00000014138	POLA2	23649	polymerase (DNA directed), alpha 2, accessory subunit [Source:HGNC Symbol;Acc:HGNC:30073]	-2.07844529162472	4.35277327011507e-69	2.49980781175562e-67
ENSG00000142856	ITGB3BP	23421	integrin beta 3 binding protein (beta3-endonexin) [Source:HGNC Symbol;Acc:HGNC:6157]	-2.19183674400745	5.38321976323031e-69	3.08263448238777e-67
ENSG00000120699	EXOSC8	11340	exosome component 8 [Source:HGNC Symbol;Acc:HGNC:17035]	-1.86169169670567	7.0490303831592e-69	4.02487411126281e-67
ENSG00000178038	ALS2CL	259173	ALS2 C-terminal like [Source:HGNC Symbol;Acc:HGNC:20605]	1.88614095089518	7.61677818372739e-69	4.33651497976134e-67
ENSG00000026751	SLAMF7	57823	SLAM family member 7 [Source:HGNC Symbol;Acc:HGNC:21394]	4.43041890353956	1.15786277854323e-68	6.57320030255748e-67
ENSG00000135679	MDM2	4193	MDM2 proto-oncogene, E3 ubiquitin protein ligase [Source:HGNC Symbol;Acc:HGNC:6973]	1.97235706087411	1.24679861131593e-68	7.05780898715115e-67
ENSG00000220323	HIST2H2BD	NA	histone cluster 2, H2bd (pseudogene) [Source:HGNC Symbol;Acc:HGNC:20517]	-3.342143076557	2.1415310473769e-68	1.20880249634223e-66
ENSG00000173193	PARP14	54625	poly (ADP-ribose) polymerase family, member 14 [Source:HGNC Symbol;Acc:HGNC:29232]	1.91596413294178	4.32947423442823e-68	2.43684025570838e-66
ENSG00000187837	HIST1H1C	3006	histone cluster 1, H1c [Source:HGNC Symbol;Acc:HGNC:4716]	-2.26943848651542	4.94158966994956e-68	2.77346720225919e-66
ENSG00000091986	CCDC80	151887	coiled-coil domain containing 80 [Source:HGNC Symbol;Acc:HGNC:30649]	1.89437489427491	7.00054274740402e-68	3.91792415064345e-66
ENSG00000158169	FANCC	2176	Fanconi anemia, complementation group C [Source:HGNC Symbol;Acc:HGNC:3584]	-1.92127688048632	7.76695290008793e-68	4.3345740535067e-66
ENSG00000197061	HIST1H4C	8364	histone cluster 1, H4c [Source:HGNC Symbol;Acc:HGNC:4787]	-2.74576059666179	1.38454480605029e-67	7.70508934882521e-66
ENSG00000141499	WRAP53	55135	WD repeat containing, antisense to TP53 [Source:HGNC Symbol;Acc:HGNC:25522]	-1.80000305639386	1.41252726027949e-67	7.83873273991057e-66
ENSG00000169429	CXCL8	3576	chemokine (C-X-C motif) ligand 8 [Source:HGNC Symbol;Acc:HGNC:6025]	2.71065973549555	1.47663992167374e-67	8.17156814918388e-66
ENSG00000175938	ORAI3	93129	ORAI calcium release-activated calcium modulator 3 [Source:HGNC Symbol;Acc:HGNC:28185]	1.78301977372646	3.6000687827545e-67	1.98667482882955e-65
ENSG00000139278	GLIPR1	11010	GLI pathogenesis-related 1 [Source:HGNC Symbol;Acc:HGNC:17001]	2.34338694357829	3.95555439850021e-67	2.17676692748663e-65
ENSG00000121211	MND1	84057	meiotic nuclear divisions 1 homolog (S. cerevisiae) [Source:HGNC Symbol;Acc:HGNC:24839]	-3.2183859454457	5.25635476938134e-67	2.88457068955272e-65
ENSG00000112312	GMNN	51053	geminin, DNA replication inhibitor [Source:HGNC Symbol;Acc:HGNC:17493]	-1.80099435889573	5.35569803683251e-67	2.93094654891033e-65
ENSG00000104147	OIP5	11339	Opa interacting protein 5 [Source:HGNC Symbol;Acc:HGNC:20300]	-3.35786576836677	5.46780170692989e-67	2.98403012492008e-65
ENSG00000153044	CENPH	64946	centromere protein H [Source:HGNC Symbol;Acc:HGNC:17268]	-2.51057097392909	1.71189454037065e-66	9.31685634698694e-65
ENSG00000104889	RNASEH2A	10535	ribonuclease H2, subunit A [Source:HGNC Symbol;Acc:HGNC:18518]	-2.21046134488469	2.41095359095748e-66	1.3085384379933e-64
ENSG00000132967	HMGB1P5	NA	high mobility group box 1 pseudogene 5 [Source:HGNC Symbol;Acc:HGNC:4997]	-1.97161985964923	5.71839834048282e-66	3.09514185245421e-64
ENSG00000105011	ASF1B	55723	anti-silencing function 1B histone chaperone [Source:HGNC Symbol;Acc:HGNC:20996]	-2.44890162761303	6.36076624476971e-66	3.43342344075602e-64
ENSG00000158402	CDC25C	995	cell division cycle 25C [Source:HGNC Symbol;Acc:HGNC:1727]	-2.60897564343292	6.82897648218883e-66	3.6761106098671e-64
ENSG00000213551	DNAJC9	23234	DnaJ (Hsp40) homolog, subfamily C, member 9 [Source:HGNC Symbol;Acc:HGNC:19123]	-1.45269921317606	1.18370180920231e-65	6.35467743005455e-64
ENSG00000103034	NDRG4	65009	NDRG family member 4 [Source:HGNC Symbol;Acc:HGNC:14466]	1.61305767281243	1.24019339030105e-65	6.63990802677168e-64
ENSG00000105281	SLC1A5	6510	solute carrier family 1 (neutral amino acid transporter), member 5 [Source:HGNC Symbol;Acc:HGNC:10943]	-1.50362625210338	2.51938277696037e-65	1.34521422004403e-63
ENSG00000171931	FBXW10	10517	F-box and WD repeat domain containing 10 [Source:HGNC Symbol;Acc:HGNC:1211]	2.49846112396278	2.80033081297118e-65	1.49119502806088e-63
ENSG00000101447	FAM83D	81610	family with sequence similarity 83, member D [Source:HGNC Symbol;Acc:HGNC:16122]	-2.15541301489015	3.58096819435977e-65	1.90176364644547e-63
ENSG00000275620		100192386	uncharacterized LOC100192386 [Source:EntrezGene;Acc:100192386]	3.95379078888066	4.47722257915377e-65	2.37136754085153e-63
ENSG00000153071	DAB2	1601	Dab, mitogen-responsive phosphoprotein, homolog 2 (Drosophila) [Source:HGNC Symbol;Acc:HGNC:2662]	1.78787262161199	4.61180125174258e-65	2.43611619062638e-63
ENSG00000134326	CMPK2	129607	cytidine monophosphate (UMP-CMP) kinase 2, mitochondrial [Source:HGNC Symbol;Acc:HGNC:27015]	4.24559132701752	1.31014824840287e-64	6.90221034545256e-63
ENSG00000250337	LINC01021	643401	long intergenic non-protein coding RNA 1021 [Source:HGNC Symbol;Acc:HGNC:48995]	1.95447209818794	1.57850631374006e-64	8.29387519527889e-63
ENSG00000163781	TOPBP1	11073	topoisomerase (DNA) II binding protein 1 [Source:HGNC Symbol;Acc:HGNC:17008]	-1.39731061152031	1.62352946159097e-64	8.50781115204013e-63
ENSG00000065911	MTHFD2	10797	methylenetetrahydrofolate dehydrogenase (NADP+ dependent) 2, methenyltetrahydrofolate cyclohydrolase [Source:HGNC Symbol;Acc:HGNC:7434]	-1.69601998762464	1.66140794915627e-64	8.68327392686012e-63
ENSG00000147003	TMEM27	57393	transmembrane protein 27 [Source:HGNC Symbol;Acc:HGNC:29437]	2.65460452762991	3.31501951733805e-64	1.72800859062086e-62
ENSG00000183814	LIN9	286826	lin-9 DREAM MuvB core complex component [Source:HGNC Symbol;Acc:HGNC:30830]	-2.06909389170369	3.64063128735941e-64	1.89274504508086e-62
ENSG00000138759	FRAS1	80144	Fraser extracellular matrix complex subunit 1 [Source:HGNC Symbol;Acc:HGNC:19185]	1.42158956365361	5.07994059313774e-64	2.63305900569581e-62
ENSG00000163739	CXCL1	2919	chemokine (C-X-C motif) ligand 1 (melanoma growth stimulating activity, alpha) [Source:HGNC Symbol;Acc:HGNC:4602]	2.42981142818083	5.09125602437638e-64	2.63305900569581e-62
ENSG00000189403	HMGB1	3146	high mobility group box 1 [Source:HGNC Symbol;Acc:HGNC:4983]	-1.6964153167969	1.36922269071535e-63	7.06275808819126e-62
ENSG00000130816	DNMT1	1786	DNA (cytosine-5-)-methyltransferase 1 [Source:HGNC Symbol;Acc:HGNC:2976]	-1.54662086343826	1.63139512193486e-63	8.39318802837112e-62
ENSG00000129534	MIS18BP1	55320	MIS18 binding protein 1 [Source:HGNC Symbol;Acc:HGNC:20190]	-1.41965839765252	2.0280737867816e-63	1.04069157744564e-61
ENSG00000159259	CHAF1B	8208	chromatin assembly factor 1, subunit B (p60) [Source:HGNC Symbol;Acc:HGNC:1911]	-2.03366769711357	5.84315209379985e-63	2.99060395764533e-61
ENSG00000163346	PBXIP1	57326	pre-B-cell leukemia homeobox interacting protein 1 [Source:HGNC Symbol;Acc:HGNC:21199]	1.46602680200324	9.68546551699212e-63	4.9443425517751e-61
ENSG00000026103	FAS	355	Fas cell surface death receptor [Source:HGNC Symbol;Acc:HGNC:11920]	1.57618632865483	9.94158571843837e-63	5.06200947045022e-61
ENSG00000166147	FBN1	2200	fibrillin 1 [Source:HGNC Symbol;Acc:HGNC:3603]	2.56525571683847	1.12227637967651e-62	5.69966379354477e-61
ENSG00000188153	COL4A5	1287	collagen, type IV, alpha 5 [Source:HGNC Symbol;Acc:HGNC:2207]	1.84634360245379	1.44383959743204e-62	7.31397309919678e-61
ENSG00000101945	SUV39H1	6839	suppressor of variegation 3-9 homolog 1 (Drosophila) [Source:HGNC Symbol;Acc:HGNC:11479]	-1.99905639491479	2.02546317883526e-62	1.02340282764884e-60
ENSG00000000460	C1orf112	55732	chromosome 1 open reading frame 112 [Source:HGNC Symbol;Acc:HGNC:25565]	-1.94983179184313	2.29918830159925e-62	1.15874398179578e-60
ENSG00000183763	TRAIP	10293	TRAF interacting protein [Source:HGNC Symbol;Acc:HGNC:30764]	-2.53019801285574	2.99250164229157e-62	1.50432219962118e-60
ENSG00000005238	FAM214B	80256	family with sequence similarity 214, member B [Source:HGNC Symbol;Acc:HGNC:25666]	1.82537973112196	3.3080244943136e-62	1.65871400785938e-60
ENSG00000173918	C1QTNF1	114897	C1q and tumor necrosis factor related protein 1 [Source:HGNC Symbol;Acc:HGNC:14324]	1.86594379614304	3.60489821386863e-62	1.80299668640984e-60
ENSG00000146411	SLC2A12	154091	solute carrier family 2 (facilitated glucose transporter), member 12 [Source:HGNC Symbol;Acc:HGNC:18067]	2.35288987420383	6.67886043545773e-62	3.33200926168947e-60
ENSG00000075131	TIPIN	54962	TIMELESS interacting protein [Source:HGNC Symbol;Acc:HGNC:30750]	-1.88885538398277	9.99449345354427e-62	4.9735821830786e-60
ENSG00000198830	HMGN2	3151	high mobility group nucleosomal binding domain 2 [Source:HGNC Symbol;Acc:HGNC:4986]	-1.69714122113129	1.29577354518491e-61	6.43198546700328e-60
ENSG00000112139	MDGA1	266727	MAM domain containing glycosylphosphatidylinositol anchor 1 [Source:HGNC Symbol;Acc:HGNC:19267]	2.26131043467659	2.22458205391109e-61	1.10147476333502e-59
ENSG00000138356	AOX1	316	aldehyde oxidase 1 [Source:HGNC Symbol;Acc:HGNC:553]	3.29204264954719	2.4339466062101e-61	1.20212622880717e-59
ENSG00000152689	RASGRP3	25780	RAS guanyl releasing protein 3 (calcium and DAG-regulated) [Source:HGNC Symbol;Acc:HGNC:14545]	3.74899769586706	4.1332342456325e-61	2.03631360989316e-59
ENSG00000114771	AADAC	13	arylacetamide deacetylase [Source:HGNC Symbol;Acc:HGNC:17]	1.8202037980167	8.67994675203194e-61	4.2656972147548e-59
ENSG00000168679	SLC16A4	9122	solute carrier family 16, member 4 [Source:HGNC Symbol;Acc:HGNC:10925]	1.40604332395593	9.21841850996221e-61	4.51908377376708e-59
ENSG00000138658	ZGRF1	55345	zinc finger, GRF-type containing 1 [Source:HGNC Symbol;Acc:HGNC:25654]	-1.99343824833758	1.81186124718996e-60	8.86018089096158e-59
ENSG00000137135	ARHGEF39	84904	Rho guanine nucleotide exchange factor (GEF) 39 [Source:HGNC Symbol;Acc:HGNC:25909]	-2.2047201367545	1.83810903655764e-60	8.96634126573648e-59
ENSG00000144354	CDCA7	83879	cell division cycle associated 7 [Source:HGNC Symbol;Acc:HGNC:14628]	-1.5170186281719	2.43084728184367e-60	1.18285268226856e-58
ENSG00000125968	ID1	3397	inhibitor of DNA binding 1, dominant negative helix-loop-helix protein [Source:HGNC Symbol;Acc:HGNC:5360]	-1.50859138681409	3.34704593437898e-60	1.62467418868774e-58
ENSG00000149136	SSRP1	6749	structure specific recognition protein 1 [Source:HGNC Symbol;Acc:HGNC:11327]	-1.58098537741005	3.67897125234383e-60	1.78141558973786e-58
ENSG00000119943	PYROXD2	84795	pyridine nucleotide-disulphide oxidoreductase domain 2 [Source:HGNC Symbol;Acc:HGNC:23517]	2.01596828895251	5.16121941347885e-60	2.4930330252491e-58
ENSG00000168056	LTBP3	4054	latent transforming growth factor beta binding protein 3 [Source:HGNC Symbol;Acc:HGNC:6716]	1.44185407068912	5.2314438950871e-60	2.5207903802766e-58
ENSG00000038427	VCAN	1462	versican [Source:HGNC Symbol;Acc:HGNC:2464]	1.85745918812966	5.58440154101292e-60	2.68431719815697e-58
ENSG00000161509	GRIN2C	2905	glutamate receptor, ionotropic, N-methyl D-aspartate 2C [Source:HGNC Symbol;Acc:HGNC:4587]	3.47201738684067	9.70568931364398e-60	4.65401937088229e-58
ENSG00000029534	ANK1	286	ankyrin 1, erythrocytic [Source:HGNC Symbol;Acc:HGNC:492]	1.85288225687714	1.9203318230834e-59	9.18597469657038e-58
ENSG00000070950	RAD18	56852	RAD18 E3 ubiquitin protein ligase [Source:HGNC Symbol;Acc:HGNC:18278]	-1.70996307361679	2.27572495851968e-59	1.08597155266944e-57
ENSG00000213390	ARHGAP19	84986	Rho GTPase activating protein 19 [Source:HGNC Symbol;Acc:HGNC:23724]	-2.03981742322811	2.61501570595301e-59	1.24487350088693e-57
ENSG00000151849	CENPJ	55835	centromere protein J [Source:HGNC Symbol;Acc:HGNC:17272]	-1.54092082721588	3.28545783465714e-59	1.56027656205496e-57
ENSG00000130203	APOE	348	apolipoprotein E [Source:HGNC Symbol;Acc:HGNC:613]	2.77661638831439	6.06904811396516e-59	2.87530250694235e-57
ENSG00000128944	KNSTRN	90417	kinetochore-localized astrin/SPAG5 binding protein [Source:HGNC Symbol;Acc:HGNC:30767]	-1.76814910888902	6.5647695045126e-59	3.10271737634332e-57
ENSG00000259529		NA	Interferon regulatory factor 9 [Source:UniProtKB/TrEMBL;Acc:A0A0B4J293]	1.45385741587639	7.11723104853824e-59	3.35579991873321e-57
ENSG00000136518	ACTL6A	86	actin-like 6A [Source:HGNC Symbol;Acc:HGNC:24124]	-1.46028149296659	9.85773765544798e-59	4.6368920266912e-57
ENSG00000137959	IFI44L	10964	interferon-induced protein 44-like [Source:HGNC Symbol;Acc:HGNC:17817]	4.73454748719341	1.06804417319885e-58	5.01194315575212e-57
ENSG00000125450	NUP85	79902	nucleoporin 85kDa [Source:HGNC Symbol;Acc:HGNC:8734]	-1.35152314663378	1.50262565936042e-58	7.03456694936598e-57
ENSG00000265972	TXNIP	10628	thioredoxin interacting protein [Source:HGNC Symbol;Acc:HGNC:16952]	3.94155547593854	1.52383323031132e-58	7.1169856496526e-57
ENSG00000179750	APOBEC3B	9582	apolipoprotein B mRNA editing enzyme, catalytic polypeptide-like 3B [Source:HGNC Symbol;Acc:HGNC:17352]	-2.69734317181906	1.56019590128508e-58	7.26962977023305e-57
ENSG00000180155	LYNX1	66004	Ly6/neurotoxin 1 [Source:HGNC Symbol;Acc:HGNC:29604]	1.727071749828	1.92501400027576e-58	8.94837096222305e-57
ENSG00000139178	C1RL	51279	complement component 1, r subcomponent-like [Source:HGNC Symbol;Acc:HGNC:21265]	1.51396517758132	2.3904068354939e-58	1.10856519816942e-56
ENSG00000111799	COL12A1	1303	collagen, type XII, alpha 1 [Source:HGNC Symbol;Acc:HGNC:2188]	1.72114408519019	2.66793010083598e-58	1.2343706574266e-56
ENSG00000164087	POC1A	25886	POC1 centriolar protein A [Source:HGNC Symbol;Acc:HGNC:24488]	-2.22329614412054	7.00173680795884e-58	3.23192318640268e-56
ENSG00000198796	ALPK2	115701	alpha-kinase 2 [Source:HGNC Symbol;Acc:HGNC:20565]	1.5345396841329	7.50557046139636e-58	3.45641142273535e-56
ENSG00000184260	HIST2H2AC	8338	histone cluster 2, H2ac [Source:HGNC Symbol;Acc:HGNC:4738]	-2.41886298892247	1.01010452982961e-57	4.64084304449158e-56
ENSG00000072195	SPEG	10290,100996693	SPEG complex locus [Source:HGNC Symbol;Acc:HGNC:16901]	2.78458800406653	2.68947444997276e-57	1.23279019103624e-55
ENSG00000123136	DDX39A	10212	DEAD (Asp-Glu-Ala-Asp) box polypeptide 39A [Source:HGNC Symbol;Acc:HGNC:17821]	-1.63851514225001	2.81732745462593e-57	1.28840558318495e-55
ENSG00000097046	CDC7	8317	cell division cycle 7 [Source:HGNC Symbol;Acc:HGNC:1745]	-1.78509331397446	3.42746226021959e-57	1.5638093397898e-55
ENSG00000111581	NUP107	57122	nucleoporin 107kDa [Source:HGNC Symbol;Acc:HGNC:29914]	-1.40275293805738	3.70719189016189e-57	1.68754108253544e-55
ENSG00000164463	CREBRF	153222	CREB3 regulatory factor [Source:HGNC Symbol;Acc:HGNC:24050]	1.68596499837593	5.67280354520487e-57	2.57636567446132e-55
ENSG00000186591	UBE2H	7328	ubiquitin-conjugating enzyme E2H [Source:HGNC Symbol;Acc:HGNC:12484]	1.50390293412214	6.31963877520914e-57	2.86355008355577e-55
ENSG00000213853	EMP2	2013	epithelial membrane protein 2 [Source:HGNC Symbol;Acc:HGNC:3334]	-1.42387324944295	9.28636468416097e-57	4.19820184668842e-55
ENSG00000132821	VSTM2L	128434	V-set and transmembrane domain containing 2 like [Source:HGNC Symbol;Acc:HGNC:16096]	3.16915642513533	1.30409662425805e-56	5.8821308011055e-55
ENSG00000136943	CTSV	1515	cathepsin V [Source:HGNC Symbol;Acc:HGNC:2538]	-2.22511245109701	1.62310429565178e-56	7.30433905806301e-55
ENSG00000055163	CYFIP2	26999	cytoplasmic FMR1 interacting protein 2 [Source:HGNC Symbol;Acc:HGNC:13760]	1.30074870915692	1.63545267570429e-56	7.34318251391228e-55
ENSG00000188549	C15orf52	388115	chromosome 15 open reading frame 52 [Source:HGNC Symbol;Acc:HGNC:33488]	1.86727409519001	2.81961080995712e-56	1.26313449345834e-54
ENSG00000163131	CTSS	1520	cathepsin S [Source:HGNC Symbol;Acc:HGNC:2545]	1.48917826541296	3.03427865764464e-56	1.35622645159338e-54
ENSG00000259288		56924	Serine/threonine-protein kinase PAK 6 [Source:UniProtKB/Swiss-Prot;Acc:Q9NQU5]	-2.76069038935636	3.36617516127649e-56	1.5011773473178e-54
ENSG00000198286	CARD11	84433	caspase recruitment domain family, member 11 [Source:HGNC Symbol;Acc:HGNC:16393]	2.98357922471276	4.83740692709951e-56	2.15242818134635e-54
ENSG00000272196	HIST2H2AA4	723790	histone cluster 2, H2aa4 [Source:HGNC Symbol;Acc:HGNC:29668]	-2.65376245061051	5.2541521370011e-56	2.33260740715941e-54
ENSG00000062822	POLD1	5424	polymerase (DNA directed), delta 1, catalytic subunit [Source:HGNC Symbol;Acc:HGNC:9175]	-1.51848821338708	7.23401683349421e-56	3.20437750140161e-54
ENSG00000268942	CKS1BP3	NA	CDC28 protein kinase regulatory subunit 1B pseudogene 3 [Source:HGNC Symbol;Acc:HGNC:24233]	-2.35142184799232	1.04153133857997e-55	4.60324230984026e-54
ENSG00000165434	PGM2L1	283209	phosphoglucomutase 2-like 1 [Source:HGNC Symbol;Acc:HGNC:20898]	1.74604663381991	1.08670787779389e-55	4.79218768609287e-54
ENSG00000168487	BMP1	649	bone morphogenetic protein 1 [Source:HGNC Symbol;Acc:HGNC:1067]	1.73507449013191	1.28225177384516e-55	5.64190780491871e-54
ENSG00000138678	AGPAT9	84803	1-acylglycerol-3-phosphate O-acyltransferase 9 [Source:HGNC Symbol;Acc:HGNC:28157]	-1.68178787806825	1.3575310251086e-55	5.95986287378788e-54
ENSG00000096060	FKBP5	2289	FK506 binding protein 5 [Source:HGNC Symbol;Acc:HGNC:3721]	-1.80139894933921	1.78949199053377e-55	7.83884784146012e-54
ENSG00000196890	HIST3H2BB	128312	histone cluster 3, H2bb [Source:HGNC Symbol;Acc:HGNC:20514]	-2.85448613978355	4.10343513599628e-55	1.79352797669784e-53
ENSG00000149554	CHEK1	1111	checkpoint kinase 1 [Source:HGNC Symbol;Acc:HGNC:1925]	-1.54203982896424	6.00390278332897e-55	2.6183908032549e-53
ENSG00000099901	RANBP1	5902	RAN binding protein 1 [Source:HGNC Symbol;Acc:HGNC:9847]	-1.5422882004373	7.81536550907556e-55	3.40088900875103e-53
ENSG00000153822	KCNJ16	3773	potassium channel, inwardly rectifying subfamily J, member 16 [Source:HGNC Symbol;Acc:HGNC:6262]	3.36208302922965	8.23169484602098e-55	3.57418381050528e-53
ENSG00000123416	TUBA1B	10376	tubulin, alpha 1b [Source:HGNC Symbol;Acc:HGNC:18809]	-2.24224223258462	8.69721241548268e-55	3.76802913333938e-53
ENSG00000113460	BRIX1	55299	BRX1, biogenesis of ribosomes [Source:HGNC Symbol;Acc:HGNC:24170]	-1.33731403169361	1.15015647800498e-54	4.97209877012395e-53
ENSG00000115163	CENPA	1058	centromere protein A [Source:HGNC Symbol;Acc:HGNC:1851]	-2.01928281050518	2.38023437703144e-54	1.02672293346361e-52
ENSG00000143217	PVRL4	81607	poliovirus receptor-related 4 [Source:HGNC Symbol;Acc:HGNC:19688]	3.50997575799257	2.6448989224037e-54	1.13840137496748e-52
ENSG00000188486	H2AFX	3014	H2A histone family, member X [Source:HGNC Symbol;Acc:HGNC:4739]	-2.22610999676797	2.68377811679963e-54	1.1526243581629e-52
ENSG00000049541	RFC2	5982	replication factor C (activator 1) 2, 40kDa [Source:HGNC Symbol;Acc:HGNC:9970]	-1.74501276647673	2.71894263793641e-54	1.16519372570655e-52
ENSG00000105202	FBL	2091	fibrillarin [Source:HGNC Symbol;Acc:HGNC:3599]	-1.61033606708133	3.64257609236603e-54	1.55763491949747e-52
ENSG00000134222	PSRC1	84722	proline/serine-rich coiled-coil 1 [Source:HGNC Symbol;Acc:HGNC:24472]	-1.84531692111446	4.32930595920856e-54	1.84729521663335e-52
ENSG00000186638	KIF24	347240	kinesin family member 24 [Source:HGNC Symbol;Acc:HGNC:19916]	-1.84249809112931	5.47492640058864e-54	2.33109150797477e-52
ENSG00000165757	KIAA1462	57608	KIAA1462 [Source:HGNC Symbol;Acc:HGNC:29283]	1.91485614645636	7.0720629038927e-54	3.0046381662216e-52
ENSG00000261487		NA		1.62760804795045	7.19278612691648e-54	3.04937087389189e-52
ENSG00000214826	DDX12P	NA	DEAD/H (Asp-Glu-Ala-Asp/His) box polypeptide 12, pseudogene [Source:HGNC Symbol;Acc:HGNC:2737]	-1.91146214503495	7.40288993608043e-54	3.13172363120353e-52
ENSG00000164649	CDCA7L	55536	cell division cycle associated 7-like [Source:HGNC Symbol;Acc:HGNC:30777]	-1.51854850078405	1.09072325935028e-53	4.60434374182139e-52
ENSG00000025770	NCAPH2	29781	non-SMC condensin II complex, subunit H2 [Source:HGNC Symbol;Acc:HGNC:25071]	-1.66985580242568	1.1238562725071e-53	4.73409478030924e-52
ENSG00000127423	AUNIP	79000	aurora kinase A and ninein interacting protein [Source:HGNC Symbol;Acc:HGNC:28363]	-2.5210696823448	1.26776856258331e-53	5.32894377072251e-52
ENSG00000148019	CEP78	84131	centrosomal protein 78kDa [Source:HGNC Symbol;Acc:HGNC:25740]	-1.40659852777251	3.63674337001992e-53	1.52542467129753e-51
ENSG00000160949	TONSL	4796	tonsoku-like, DNA repair protein [Source:HGNC Symbol;Acc:HGNC:7801]	-1.60350835627382	4.15305615638297e-53	1.73830036918436e-51
ENSG00000162520	SYNC	81493	syncoilin, intermediate filament protein [Source:HGNC Symbol;Acc:HGNC:28897]	1.96224059213954	5.60575297033614e-53	2.34137961272644e-51
ENSG00000012822	CALCOCO1	57658	calcium binding and coiled-coil domain 1 [Source:HGNC Symbol;Acc:HGNC:29306]	1.64684313883563	1.15420760521219e-52	4.81065937733587e-51
ENSG00000184992	BRI3BP	140707	BRI3 binding protein [Source:HGNC Symbol;Acc:HGNC:14251]	-1.34946783952809	1.38505192148817e-52	5.76064963387796e-51
ENSG00000266714	MYO15B	NA	myosin XVB [Source:HGNC Symbol;Acc:HGNC:14083]	1.44544033193615	1.82965636482741e-52	7.59384267721225e-51
ENSG00000146410	MTFR2	113115	mitochondrial fission regulator 2 [Source:HGNC Symbol;Acc:HGNC:21115]	-2.26467251057377	1.95935452784709e-52	8.11509602770378e-51
ENSG00000001461	NIPAL3	57185	NIPA-like domain containing 3 [Source:HGNC Symbol;Acc:HGNC:25233]	1.35790404259825	2.51512734650008e-52	1.03951581291748e-50
ENSG00000256566		NA	Uncharacterized protein [Source:UniProtKB/TrEMBL;Acc:F5H5K5]	-1.32827922240167	2.56907246655373e-52	1.05959489873143e-50
ENSG00000181381	DDX60L	91351	DEAD (Asp-Glu-Ala-Asp) box polypeptide 60-like [Source:HGNC Symbol;Acc:HGNC:26429]	1.90093563834369	2.74952108534358e-52	1.131657053376e-50
ENSG00000116701	NCF2	4688	neutrophil cytosolic factor 2 [Source:HGNC Symbol;Acc:HGNC:7661]	3.46392342368196	3.21020397359419e-52	1.31851953643091e-50
ENSG00000137673	MMP7	4316	matrix metallopeptidase 7 [Source:HGNC Symbol;Acc:HGNC:7174]	1.75294324521806	7.16768968197074e-52	2.93786052607913e-50
ENSG00000133302	ANKRD32	84250	ankyrin repeat domain 32 [Source:HGNC Symbol;Acc:HGNC:25408]	-1.42552282656604	8.24204436743128e-52	3.37121798184208e-50
ENSG00000198753	PLXNB3	5365	plexin B3 [Source:HGNC Symbol;Acc:HGNC:9105]	2.60683973115981	1.29645536651105e-51	5.29189508694055e-50
ENSG00000197771	MCMBP	79892	minichromosome maintenance complex binding protein [Source:HGNC Symbol;Acc:HGNC:25782]	-1.31029841077436	1.89891677981423e-51	7.73505152618762e-50
ENSG00000138131	LOXL4	84171	lysyl oxidase-like 4 [Source:HGNC Symbol;Acc:HGNC:17171]	2.34728525076105	2.73571549142583e-51	1.11207397630882e-49
ENSG00000165501	LRR1	122769	leucine rich repeat protein 1 [Source:HGNC Symbol;Acc:HGNC:19742]	-1.6961043954718	3.11099503292628e-51	1.26202911438381e-49
ENSG00000161981	SNRNP25	79622	small nuclear ribonucleoprotein 25kDa (U11/U12) [Source:HGNC Symbol;Acc:HGNC:14161]	-1.9310064784323	3.39317735250792e-51	1.37368056918333e-49
ENSG00000106268	NUDT1	4521	nudix (nucleoside diphosphate linked moiety X)-type motif 1 [Source:HGNC Symbol;Acc:HGNC:8048]	-2.05071115987758	3.48593661278676e-51	1.40834690638477e-49
ENSG00000187098	MITF	4286	microphthalmia-associated transcription factor [Source:HGNC Symbol;Acc:HGNC:7105]	1.52761496574318	3.80674336039935e-51	1.53481677200101e-49
ENSG00000100100	PIK3IP1	113791	phosphoinositide-3-kinase interacting protein 1 [Source:HGNC Symbol;Acc:HGNC:24942]	3.12159023130193	7.91139969956124e-51	3.18325076302509e-49
ENSG00000095752	IL11	3589	interleukin 11 [Source:HGNC Symbol;Acc:HGNC:5966]	2.52942003581971	1.58933817280207e-50	6.38190344347106e-49
ENSG00000187790	FANCM	57697	Fanconi anemia, complementation group M [Source:HGNC Symbol;Acc:HGNC:23168]	-1.36955882902927	2.12888482264127e-50	8.53108489981763e-49
ENSG00000114796	KLHL24	54800	kelch-like family member 24 [Source:HGNC Symbol;Acc:HGNC:25947]	1.46538241430446	2.34818207030641e-50	9.39082691922538e-49
ENSG00000167775	CD320	51293	CD320 molecule [Source:HGNC Symbol;Acc:HGNC:16692]	-1.55232649464249	2.39436317758512e-50	9.55616948209526e-49
ENSG00000214548	MEG3	55384	maternally expressed 3 (non-protein coding) [Source:HGNC Symbol;Acc:HGNC:14575]	2.02072419650255	3.30780693182626e-50	1.31752084163628e-48
ENSG00000180336	C17orf104	284071	chromosome 17 open reading frame 104 [Source:HGNC Symbol;Acc:HGNC:26670]	-1.4719759094022	3.34726819871883e-50	1.33055594635592e-48
ENSG00000178966	RMI1	80010	RecQ mediated genome instability 1 [Source:HGNC Symbol;Acc:HGNC:25764]	-2.07821849723914	3.36254900973078e-50	1.33394614932211e-48
ENSG00000205208	C4orf46	201725	chromosome 4 open reading frame 46 [Source:HGNC Symbol;Acc:HGNC:27320]	-1.63409418103219	3.80886677096835e-50	1.50797538932366e-48
ENSG00000047346	FAM214A	56204	family with sequence similarity 214, member A [Source:HGNC Symbol;Acc:HGNC:25609]	1.53443125972431	3.89165559418726e-50	1.53767095837527e-48
ENSG00000067066	SP100	6672	SP100 nuclear antigen [Source:HGNC Symbol;Acc:HGNC:11206]	1.39561425088297	5.64029534033077e-50	2.22414520446257e-48
ENSG00000110013	SIAE	54414	sialic acid acetylesterase [Source:HGNC Symbol;Acc:HGNC:18187]	1.53289551324591	6.76745991895793e-50	2.6633055410146e-48
ENSG00000125835	SNRPB	6628	small nuclear ribonucleoprotein polypeptides B and B1 [Source:HGNC Symbol;Acc:HGNC:11153]	-1.47749702583245	8.34310896358087e-50	3.27686800565614e-48
ENSG00000049130	KITLG	4254	KIT ligand [Source:HGNC Symbol;Acc:HGNC:6343]	1.25416096692314	9.26125363929859e-50	3.63026442257903e-48
ENSG00000140853	NLRC5	84166	NLR family, CARD domain containing 5 [Source:HGNC Symbol;Acc:HGNC:29933]	1.95429282442322	1.35600191174155e-49	5.30478688482498e-48
ENSG00000182004	SNRPE	6635	small nuclear ribonucleoprotein polypeptide E [Source:HGNC Symbol;Acc:HGNC:11161]	-1.41087926317596	1.40426943084951e-49	5.48275629957765e-48
ENSG00000164362	TERT	7015	telomerase reverse transcriptase [Source:HGNC Symbol;Acc:HGNC:11730]	-3.55952147819138	1.65602354684582e-49	6.45293909102287e-48
ENSG00000055044	NOP58	51602	NOP58 ribonucleoprotein [Source:HGNC Symbol;Acc:HGNC:29926]	-1.25943083803397	2.46441935989965e-49	9.5840686760192e-48
ENSG00000177076	ACER2	340485	alkaline ceramidase 2 [Source:HGNC Symbol;Acc:HGNC:23675]	2.22464686221229	2.94803606291013e-49	1.14423183612677e-47
ENSG00000138646	HERC5	51191	HECT and RLD domain containing E3 ubiquitin protein ligase 5 [Source:HGNC Symbol;Acc:HGNC:24368]	1.5672304065502	4.60304363869666e-49	1.78309274757041e-47
ENSG00000135899	SP110	3431	SP110 nuclear body protein [Source:HGNC Symbol;Acc:HGNC:5401]	1.8582319773234	6.45170493561805e-49	2.49432255788787e-47
ENSG00000181938	GINS3	64785	GINS complex subunit 3 (Psf3 homolog) [Source:HGNC Symbol;Acc:HGNC:25851]	-1.64921110898995	7.99695487050287e-49	3.08570000823544e-47
ENSG00000203760	CENPW	387103	centromere protein W [Source:HGNC Symbol;Acc:HGNC:21488]	-2.78107381194539	8.43318386824472e-49	3.2476799317942e-47
ENSG00000239306	RBM14	10432	RNA binding motif protein 14 [Source:HGNC Symbol;Acc:HGNC:14219]	-1.30473745247829	9.28382314450173e-49	3.56831147943144e-47
ENSG00000132780	NASP	4678	nuclear autoantigenic sperm protein (histone-binding) [Source:HGNC Symbol;Acc:HGNC:7644]	-1.19028961236366	1.04090512653419e-48	3.99303333588534e-47
ENSG00000123933	MXD4	10608	MAX dimerization protein 4 [Source:HGNC Symbol;Acc:HGNC:13906]	1.63780656631236	1.05111435283056e-48	4.02438278188382e-47
ENSG00000106355	LSM5	23658	LSM5 homolog, U6 small nuclear RNA associated (S. cerevisiae) [Source:HGNC Symbol;Acc:HGNC:17162]	-1.34024664026613	1.3446961329854e-48	5.1384558613655e-47
ENSG00000162946	DISC1	27185	disrupted in schizophrenia 1 [Source:HGNC Symbol;Acc:HGNC:2888]	2.23525058732179	1.4223082683887e-48	5.4245409556539e-47
ENSG00000155561	NUP205	23165	nucleoporin 205kDa [Source:HGNC Symbol;Acc:HGNC:18658]	-1.43397199872458	1.43483196650067e-48	5.46176114261796e-47
ENSG00000273171		NA	Uncharacterized protein [Source:UniProtKB/TrEMBL;Acc:H0YJW9]	1.99503137253797	2.85674874125235e-48	1.08534477177272e-46
ENSG00000172244	C5orf34	375444	chromosome 5 open reading frame 34 [Source:HGNC Symbol;Acc:HGNC:24738]	-2.1168875982176	3.30938455941486e-48	1.25489829857581e-46
ENSG00000039139	DNAH5	1767	dynein, axonemal, heavy chain 5 [Source:HGNC Symbol;Acc:HGNC:2950]	1.90655747732862	3.44741924531998e-48	1.30473591207934e-46
ENSG00000137809	ITGA11	22801	integrin, alpha 11 [Source:HGNC Symbol;Acc:HGNC:6136]	3.17031377056471	3.8823045791288e-48	1.46651642954624e-46
ENSG00000196081	ZNF724P	NA	zinc finger protein 724, pseudogene [Source:HGNC Symbol;Acc:HGNC:32460]	-2.05096687132104	3.98930519829208e-48	1.50405941789043e-46
ENSG00000105855	ITGB8	3696	integrin, beta 8 [Source:HGNC Symbol;Acc:HGNC:6163]	1.64826844819493	4.49251589597401e-48	1.69055512458786e-46
ENSG00000109321	AREG	374	amphiregulin [Source:HGNC Symbol;Acc:HGNC:651]	-2.0548746693426	5.6933637082098e-48	2.13836679504549e-46
ENSG00000130827	PLXNA3	55558	plexin A3 [Source:HGNC Symbol;Acc:HGNC:9101]	2.25514319414173	6.66772543117471e-48	2.49957464171324e-46
ENSG00000182628	SKA2	348235	spindle and kinetochore associated complex subunit 2 [Source:HGNC Symbol;Acc:HGNC:28006]	-1.43557443713309	7.59205053380502e-48	2.84069224139871e-46
ENSG00000168300	PCMTD1	115294	protein-L-isoaspartate (D-aspartate) O-methyltransferase domain containing 1 [Source:HGNC Symbol;Acc:HGNC:30483]	1.28608074574327	1.25228239438714e-47	4.67676578138229e-46
ENSG00000103995	CEP152	22995	centrosomal protein 152kDa [Source:HGNC Symbol;Acc:HGNC:29298]	-1.53382704112669	1.3576595504907e-47	5.06074001499892e-46
ENSG00000135454	B4GALNT1	2583	beta-1,4-N-acetyl-galactosaminyl transferase 1 [Source:HGNC Symbol;Acc:HGNC:4117]	-1.26369129630863	1.6472083552019e-47	6.1284836657945e-46
ENSG00000109685	WHSC1	7468	Wolf-Hirschhorn syndrome candidate 1 [Source:HGNC Symbol;Acc:HGNC:12766]	-1.21415367127863	2.53489019320402e-47	9.41340049942457e-46
ENSG00000166845	C18orf54	162681	chromosome 18 open reading frame 54 [Source:HGNC Symbol;Acc:HGNC:13796]	-2.16120196001449	2.60135503922853e-47	9.64209571388347e-46
ENSG00000128335	APOL2	23780	apolipoprotein L, 2 [Source:HGNC Symbol;Acc:HGNC:619]	1.57243428606215	3.02549109893404e-47	1.11931839233223e-45
ENSG00000129946	SHC2	25759	SHC (Src homology 2 domain containing) transforming protein 2 [Source:HGNC Symbol;Acc:HGNC:29869]	3.35593014031017	4.33563514882615e-47	1.60102444860205e-45
ENSG00000146143	PRIM2	5558	primase, DNA, polypeptide 2 (58kDa) [Source:HGNC Symbol;Acc:HGNC:9370]	-1.61620552712301	4.44901550742481e-47	1.63982743217695e-45
ENSG00000179832	MROH1	727957	maestro heat-like repeat family member 1 [Source:HGNC Symbol;Acc:HGNC:26958]	1.5549375197148	5.47823734659521e-47	2.01542005622598e-45
ENSG00000248698	LINC01085	152742	long intergenic non-protein coding RNA 1085 [Source:HGNC Symbol;Acc:HGNC:27198]	3.10884766355059	7.4687941523244e-47	2.74263006084239e-45
ENSG00000124795	DEK	7913	DEK proto-oncogene [Source:HGNC Symbol;Acc:HGNC:2768]	-1.39350962262416	7.71627053966006e-47	2.82824936514887e-45
ENSG00000119514	GALNT12	79695	polypeptide N-acetylgalactosaminyltransferase 12 [Source:HGNC Symbol;Acc:HGNC:19877]	1.8128940944839	8.16398954187428e-47	2.98681069239386e-45
ENSG00000128050	PAICS	10606	phosphoribosylaminoimidazole carboxylase, phosphoribosylaminoimidazole succinocarboxamide synthetase [Source:HGNC Symbol;Acc:HGNC:8587]	-1.33100236351292	8.71825568951412e-47	3.18369425881776e-45
ENSG00000142798	HSPG2	3339	heparan sulfate proteoglycan 2 [Source:HGNC Symbol;Acc:HGNC:5273]	1.88813135342856	1.35442051336345e-46	4.93688776051816e-45
ENSG00000171992	SYNPO	11346	synaptopodin [Source:HGNC Symbol;Acc:HGNC:30672]	1.19281209859699	2.05541110847027e-46	7.4782139703386e-45
ENSG00000117228	GBP1	2633	guanylate binding protein 1, interferon-inducible [Source:HGNC Symbol;Acc:HGNC:4182]	4.54319162219586	2.51020953762868e-46	9.11612125466768e-45
ENSG00000172716	SLFN11	91607	schlafen family member 11 [Source:HGNC Symbol;Acc:HGNC:26633]	-1.40279503667009	2.89466698494691e-46	1.04930350375433e-44
ENSG00000162366	PDZK1IP1	10158	PDZK1 interacting protein 1 [Source:HGNC Symbol;Acc:HGNC:16887]	3.2076254312423	3.0183975252792e-46	1.09215130969626e-44
ENSG00000111275	ALDH2	217	aldehyde dehydrogenase 2 family (mitochondrial) [Source:HGNC Symbol;Acc:HGNC:404]	1.20155381381537	4.72354065563107e-46	1.70600126494785e-44
ENSG00000233695	GAS6-AS1	NA	GAS6 antisense RNA 1 [Source:HGNC Symbol;Acc:HGNC:39826]	1.73118911435231	6.11575236436811e-46	2.20479568814701e-44
ENSG00000136122	BORA	79866	bora, aurora kinase A activator [Source:HGNC Symbol;Acc:HGNC:24724]	-1.84545283404722	8.87024814787154e-46	3.19199676519763e-44
ENSG00000131080	EDA2R	60401	ectodysplasin A2 receptor [Source:HGNC Symbol;Acc:HGNC:17756]	1.28064707476835	9.08630228582284e-46	3.26379978106756e-44
ENSG00000187951	ARHGAP11B	89839,100288637	Rho GTPase activating protein 11B [Source:HGNC Symbol;Acc:HGNC:15782]	-1.83067103023028	1.14131320098035e-45	4.0921567329524e-44
ENSG00000131462	TUBG1	7283	tubulin, gamma 1 [Source:HGNC Symbol;Acc:HGNC:12417]	-1.23882238651327	1.35286289158838e-45	4.84187668228625e-44
ENSG00000243137	PSG4	5672	pregnancy specific beta-1-glycoprotein 4 [Source:HGNC Symbol;Acc:HGNC:9521]	3.24010280966137	1.42232832871343e-45	5.08128724449593e-44
ENSG00000115935	WIPF1	7456	WAS/WASL interacting protein family, member 1 [Source:HGNC Symbol;Acc:HGNC:12736]	1.66723928071983	1.43580070693764e-45	5.11289941295827e-44
ENSG00000184156	KCNQ3	3786	potassium channel, voltage gated KQT-like subfamily Q, member 3 [Source:HGNC Symbol;Acc:HGNC:6297]	3.28514972731104	1.43635309485313e-45	5.11289941295827e-44
ENSG00000170624	SGCD	6444	sarcoglycan, delta (35kDa dystrophin-associated glycoprotein) [Source:HGNC Symbol;Acc:HGNC:10807]	1.29714689514327	1.60469778861285e-45	5.70187221435889e-44
ENSG00000113140	SPARC	6678	secreted protein, acidic, cysteine-rich (osteonectin) [Source:HGNC Symbol;Acc:HGNC:11219]	2.02047840184771	1.68523832947769e-45	5.97730133521748e-44
ENSG00000183696	UPP1	7378	uridine phosphorylase 1 [Source:HGNC Symbol;Acc:HGNC:12576]	-1.53695583692309	1.90353581280961e-45	6.73947195660692e-44
ENSG00000204592	HLA-E	3133	major histocompatibility complex, class I, E [Source:HGNC Symbol;Acc:HGNC:4962]	1.15437418910925	1.972054399233e-45	6.96957186247712e-44
ENSG00000162645	GBP2	2634	guanylate binding protein 2, interferon-inducible [Source:HGNC Symbol;Acc:HGNC:4183]	2.48764010046075	2.19896978962783e-45	7.7576512792656e-44
ENSG00000160298	C21orf58	54058	chromosome 21 open reading frame 58 [Source:HGNC Symbol;Acc:HGNC:1300]	-1.85106307522003	2.20962865655514e-45	7.78135895524123e-44
ENSG00000170860	LSM3	27258	LSM3 homolog, U6 small nuclear RNA associated (S. cerevisiae) [Source:HGNC Symbol;Acc:HGNC:17874]	-1.57685766909804	2.24178215807526e-45	7.88054240479267e-44
ENSG00000144596	GRIP2	80852	glutamate receptor interacting protein 2 [Source:HGNC Symbol;Acc:HGNC:23841]	2.58843508706114	2.38395646865511e-45	8.35365066169335e-44
ENSG00000172915	NBEA	26960	neurobeachin [Source:HGNC Symbol;Acc:HGNC:7648]	1.23064359845756	2.38482434358931e-45	8.35365066169335e-44
ENSG00000113569	NUP155	9631	nucleoporin 155kDa [Source:HGNC Symbol;Acc:HGNC:8063]	-1.20785040518203	3.0854534401002e-45	1.07887111792247e-43
ENSG00000155629	PIK3AP1	118788	phosphoinositide-3-kinase adaptor protein 1 [Source:HGNC Symbol;Acc:HGNC:30034]	2.55212826403873	3.23887842031648e-45	1.13051735109139e-43
ENSG00000187514	PTMA	5757,728026	prothymosin, alpha [Source:HGNC Symbol;Acc:HGNC:9623]	-1.53617804352826	3.32320523103801e-45	1.15790551224668e-43
ENSG00000159167	STC1	6781	stanniocalcin 1 [Source:HGNC Symbol;Acc:HGNC:11373]	1.91410729584709	3.46458007384382e-45	1.20503950596582e-43
ENSG00000105429	MEGF8	1954	multiple EGF-like-domains 8 [Source:HGNC Symbol;Acc:HGNC:3233]	1.39269513815293	3.95714099624549e-45	1.37394160846794e-43
ENSG00000280789	PAGR1	79447	PAXIP1 associated glutamate-rich protein 1 [Source:HGNC Symbol;Acc:HGNC:28707]	-1.53990793267349	5.40215900385128e-45	1.87236935579098e-43
ENSG00000095383	TBC1D2	55357	TBC1 domain family, member 2 [Source:HGNC Symbol;Acc:HGNC:18026]	1.62907694628513	1.06053194912504e-44	3.6693291045384e-43
ENSG00000132646	PCNA	5111	proliferating cell nuclear antigen [Source:HGNC Symbol;Acc:HGNC:8729]	-1.3454364673753	1.26844723525704e-44	4.38102160484933e-43
ENSG00000109881	CCDC34	91057	coiled-coil domain containing 34 [Source:HGNC Symbol;Acc:HGNC:25079]	-1.53727232146148	1.596513664414e-44	5.50448934627625e-43
ENSG00000203668	CHML	1122	choroideremia-like (Rab escort protein 2) [Source:HGNC Symbol;Acc:HGNC:1941]	-1.22790180569495	2.59279034375285e-44	8.92389652111172e-43
ENSG00000164050	PLXNB1	5364	plexin B1 [Source:HGNC Symbol;Acc:HGNC:9103]	1.33024111146943	2.77921809152875e-44	9.54891002021599e-43
ENSG00000163006	CCDC138	165055	coiled-coil domain containing 138 [Source:HGNC Symbol;Acc:HGNC:26531]	-1.62250166507041	2.98841103919522e-44	1.02498348073508e-42
ENSG00000141030	COPS3	8533	COP9 signalosome subunit 3 [Source:HGNC Symbol;Acc:HGNC:2239]	-1.24086571339132	3.06551071186116e-44	1.04960536609236e-42
ENSG00000115758	ODC1	4953	ornithine decarboxylase 1 [Source:HGNC Symbol;Acc:HGNC:8109]	-1.48011537763941	3.38646358919441e-44	1.15749091121323e-42
ENSG00000135913	USP37	57695	ubiquitin specific peptidase 37 [Source:HGNC Symbol;Acc:HGNC:20063]	-1.24257270619616	3.65125760420166e-44	1.24584188650445e-42
ENSG00000042445	RETSAT	54884	retinol saturase (all-trans-retinol 13,14-reductase) [Source:HGNC Symbol;Acc:HGNC:25991]	1.25517838495126	3.83039957595922e-44	1.30471334521811e-42
ENSG00000280893	PAGR1	NA	PAXIP1 associated glutamate-rich protein 1 [Source:HGNC Symbol;Acc:HGNC:28707]	-1.50294030423548	4.15685634529529e-44	1.41347425056203e-42
ENSG00000249115	HAUS5	23354	HAUS augmin-like complex, subunit 5 [Source:HGNC Symbol;Acc:HGNC:29130]	-1.43008519116232	5.68015427161088e-44	1.92812934346984e-42
ENSG00000123737	EXOSC9	5393	exosome component 9 [Source:HGNC Symbol;Acc:HGNC:9137]	-1.34928318257477	6.71578464370543e-44	2.2757640037915e-42
ENSG00000156587	UBE2L6	9246	ubiquitin-conjugating enzyme E2L 6 [Source:HGNC Symbol;Acc:HGNC:12490]	1.65604595077927	9.36536746107082e-44	3.16818834864581e-42
ENSG00000189143	CLDN4	1364	claudin 4 [Source:HGNC Symbol;Acc:HGNC:2046]	2.62792443246895	9.70531636059223e-44	3.27757658153607e-42
ENSG00000115738	ID2	3398	inhibitor of DNA binding 2, dominant negative helix-loop-helix protein [Source:HGNC Symbol;Acc:HGNC:5361]	-1.90704967324617	1.07174699975012e-43	3.61321394659786e-42
ENSG00000130713	EXOSC2	23404	exosome component 2 [Source:HGNC Symbol;Acc:HGNC:17097]	-1.26085009290181	1.19520907218331e-43	4.0225809931948e-42
ENSG00000265190	ANXA8	653145	annexin A8 [Source:HGNC Symbol;Acc:HGNC:546]	2.54995634407547	1.28187331631573e-43	4.30691993828803e-42
ENSG00000120437	ACAT2	39	acetyl-CoA acetyltransferase 2 [Source:HGNC Symbol;Acc:HGNC:94]	-1.48021818890368	1.28968077287762e-43	4.32579513564859e-42
ENSG00000231007	CDC20P1	NA	cell division cycle 20 pseudogene 1 [Source:HGNC Symbol;Acc:HGNC:29487]	-3.3938328593098	1.33946080401978e-43	4.48515044817199e-42
ENSG00000278259	MYO19	80179	myosin XIX [Source:HGNC Symbol;Acc:HGNC:26234]	-1.14353635555	1.58314015971227e-43	5.29213485537659e-42
ENSG00000132517	SLC52A1	55065	solute carrier family 52 (riboflavin transporter), member 1 [Source:HGNC Symbol;Acc:HGNC:30225]	2.09197924696192	1.78837704370383e-43	5.96810420192783e-42
ENSG00000088992	TESC	54997	tescalcin [Source:HGNC Symbol;Acc:HGNC:26065]	-1.79610122221216	2.25439927993305e-43	7.51060913564204e-42
ENSG00000138587	MNS1	55329	meiosis-specific nuclear structural 1 [Source:HGNC Symbol;Acc:HGNC:29636]	-2.48091726402249	2.38635797160966e-43	7.93684984631659e-42
ENSG00000213397	HAUS7	55559	HAUS augmin-like complex, subunit 7 [Source:HGNC Symbol;Acc:HGNC:32979]	-1.5871743444309	2.39792101028047e-43	7.96190377800017e-42
ENSG00000012779	ALOX5	240	arachidonate 5-lipoxygenase [Source:HGNC Symbol;Acc:HGNC:435]	4.22968693342076	2.43504174464744e-43	8.0715913938347e-42
ENSG00000163584	RPL22L1	200916	ribosomal protein L22-like 1 [Source:HGNC Symbol;Acc:HGNC:27610]	-1.36578212336055	2.93938420555884e-43	9.72704763233172e-42
ENSG00000276966	HIST1H4E	8367	histone cluster 1, H4e [Source:HGNC Symbol;Acc:HGNC:4790]	-2.04791361314225	3.85750035837792e-43	1.27439426555375e-41
ENSG00000111639	MRPL51	51258	mitochondrial ribosomal protein L51 [Source:HGNC Symbol;Acc:HGNC:14044]	-1.25782896124689	3.91278986429117e-43	1.290502112837e-41
ENSG00000126453	BCL2L12	83596	BCL2-like 12 (proline rich) [Source:HGNC Symbol;Acc:HGNC:13787]	-1.97780722556023	4.08311584475677e-43	1.34443394381691e-41
ENSG00000085117	CD82	3732	CD82 molecule [Source:HGNC Symbol;Acc:HGNC:6210]	2.20648030705532	4.2075452327935e-43	1.38309922827069e-41
ENSG00000124207	CSE1L	1434	CSE1 chromosome segregation 1-like (yeast) [Source:HGNC Symbol;Acc:HGNC:2431]	-1.40807146169131	4.48022641553233e-43	1.47028825689795e-41
ENSG00000156804	FBXO32	114907	F-box protein 32 [Source:HGNC Symbol;Acc:HGNC:16731]	2.23589353180451	4.63807951658457e-43	1.5195671464286e-41
ENSG00000124588	NQO2	4835	NAD(P)H dehydrogenase, quinone 2 [Source:HGNC Symbol;Acc:HGNC:7856]	-1.32624335042399	5.3871878353261e-43	1.76207421977984e-41
ENSG00000166473	PKD1L2	114780	polycystic kidney disease 1-like 2 (gene/pseudogene) [Source:HGNC Symbol;Acc:HGNC:21715]	1.62511817178847	5.55902848451755e-43	1.81527548330791e-41
ENSG00000126216	TUBGCP3	10426	tubulin, gamma complex associated protein 3 [Source:HGNC Symbol;Acc:HGNC:18598]	-1.3466842185575	7.96809071047373e-43	2.59765016627259e-41
ENSG00000113356	POLR3G	10622	polymerase (RNA) III (DNA directed) polypeptide G (32kD) [Source:HGNC Symbol;Acc:HGNC:30075]	-1.79003155857618	1.00996482630694e-42	3.28712769497856e-41
ENSG00000197238	HIST1H4J	8363	histone cluster 1, H4j [Source:HGNC Symbol;Acc:HGNC:4785]	-2.41762017313738	1.02514167696502e-42	3.33103601482252e-41
ENSG00000107566	ERLIN1	10613	ER lipid raft associated 1 [Source:HGNC Symbol;Acc:HGNC:16947]	-1.21583233827473	1.16427849183645e-42	3.77692707466681e-41
ENSG00000169684	CHRNA5	1138	cholinergic receptor, nicotinic, alpha 5 (neuronal) [Source:HGNC Symbol;Acc:HGNC:1959]	-1.3064929919656	1.17112847939658e-42	3.79292036704242e-41
ENSG00000138347	MYPN	84665	myopalladin [Source:HGNC Symbol;Acc:HGNC:23246]	2.10487307042356	1.17617054625066e-42	3.80301559930082e-41
ENSG00000149948	HMGA2	8091	high mobility group AT-hook 2 [Source:HGNC Symbol;Acc:HGNC:5009]	-1.39645040144628	1.29854819719522e-42	4.19184937643609e-41
ENSG00000145284	SCD5	79966	stearoyl-CoA desaturase 5 [Source:HGNC Symbol;Acc:HGNC:21088]	1.47959465399104	1.39905487718725e-42	4.50892792067068e-41
ENSG00000196756	SNHG17	NA	small nucleolar RNA host gene 17 [Source:HGNC Symbol;Acc:HGNC:48600]	-1.35311474076837	1.47969610230647e-42	4.76105475523885e-41
ENSG00000080546	SESN1	27244	sestrin 1 [Source:HGNC Symbol;Acc:HGNC:21595]	1.35467394333226	1.5245215696382e-42	4.89730863898736e-41
ENSG00000147155	EBP	10682	emopamil binding protein (sterol isomerase) [Source:HGNC Symbol;Acc:HGNC:3133]	-1.17289994340796	1.55073618033272e-42	4.97343246406709e-41
ENSG00000131746	TNS4	84951	tensin 4 [Source:HGNC Symbol;Acc:HGNC:24352]	1.54256660951904	2.15765071324025e-42	6.90867868570087e-41
ENSG00000156136	DCK	1633	deoxycytidine kinase [Source:HGNC Symbol;Acc:HGNC:2704]	-1.53484725593081	2.80687322440738e-42	8.97291058598578e-41
ENSG00000077514	POLD3	10714	polymerase (DNA-directed), delta 3, accessory subunit [Source:HGNC Symbol;Acc:HGNC:20932]	-1.28829974336695	2.83634126642945e-42	9.05246495308244e-41
ENSG00000162062	C16orf59	80178	chromosome 16 open reading frame 59 [Source:HGNC Symbol;Acc:HGNC:25849]	-1.6704978783591	2.9858207294594e-42	9.51417327922579e-41
ENSG00000185189	NRBP2	340371	nuclear receptor binding protein 2 [Source:HGNC Symbol;Acc:HGNC:19339]	1.36868509689152	3.44210354217601e-42	1.09504343927906e-40
ENSG00000134538	SLCO1B1	10599	solute carrier organic anion transporter family, member 1B1 [Source:HGNC Symbol;Acc:HGNC:10959]	2.55501041057952	3.75536905201612e-42	1.19278249182686e-40
ENSG00000182179	UBA7	7318	ubiquitin-like modifier activating enzyme 7 [Source:HGNC Symbol;Acc:HGNC:12471]	3.79738213085158	4.4751244223882e-42	1.4191100816806e-40
ENSG00000231683		101927136		2.1042350180604	4.87622138809426e-42	1.54382419460241e-40
ENSG00000151640	DPYSL4	10570	dihydropyrimidinase-like 4 [Source:HGNC Symbol;Acc:HGNC:3016]	1.60489298207919	5.15016610762495e-42	1.62794690595582e-40
ENSG00000178726	THBD	7056	thrombomodulin [Source:HGNC Symbol;Acc:HGNC:11784]	1.91885451253341	5.89464368252963e-42	1.85919226953726e-40
ENSG00000144034	TPRKB	51002	TP53RK binding protein [Source:HGNC Symbol;Acc:HGNC:24259]	-1.29960797541853	5.90055453026859e-42	1.85919226953726e-40
ENSG00000053372	MRTO4	51154	mRNA turnover 4 homolog (S. cerevisiae) [Source:HGNC Symbol;Acc:HGNC:18477]	-1.41690128911285	6.5492332325645e-42	2.06029700226981e-40
ENSG00000136875	PRPF4	9128	pre-mRNA processing factor 4 [Source:HGNC Symbol;Acc:HGNC:17349]	-1.23697881075314	6.66075204786759e-42	2.09204797230003e-40
ENSG00000167088	SNRPD1	6632	small nuclear ribonucleoprotein D1 polypeptide 16kDa [Source:HGNC Symbol;Acc:HGNC:11158]	-1.34576179745178	9.40462956103636e-42	2.94917240647356e-40
ENSG00000204899	MZT1	440145	mitotic spindle organizing protein 1 [Source:HGNC Symbol;Acc:HGNC:33830]	-1.49116386089428	1.16727538903178e-41	3.65462640027128e-40
ENSG00000143942	CHAC2	494143	ChaC, cation transport regulator homolog 2 (E. coli) [Source:HGNC Symbol;Acc:HGNC:32363]	-1.87343155083691	1.2825467115723e-41	4.00917608130099e-40
ENSG00000175643	RMI2	116028	RecQ mediated genome instability 2 [Source:HGNC Symbol;Acc:HGNC:28349]	-2.06649763041742	1.31618695116625e-41	4.10783402957985e-40
ENSG00000154864	PIEZO2	63895	piezo-type mechanosensitive ion channel component 2 [Source:HGNC Symbol;Acc:HGNC:26270]	2.55555914230011	1.58303871378606e-41	4.93288845892074e-40
ENSG00000136527	TRA2B	6434	transformer 2 beta homolog (Drosophila) [Source:HGNC Symbol;Acc:HGNC:10781]	-1.19116818639738	1.60013660925454e-41	4.97831477991066e-40
ENSG00000250271		NA		1.76175500379289	1.80849305208861e-41	5.61770263161363e-40
ENSG00000105486	LIG1	3978	ligase I, DNA, ATP-dependent [Source:HGNC Symbol;Acc:HGNC:6598]	-1.2144866099739	1.96703692521192e-41	6.10059364120671e-40
ENSG00000162643	WDR63	126820	WD repeat domain 63 [Source:HGNC Symbol;Acc:HGNC:30711]	2.72526586043696	2.04420016264487e-41	6.329971538121e-40
ENSG00000130813	C19orf66	55337	chromosome 19 open reading frame 66 [Source:HGNC Symbol;Acc:HGNC:25649]	1.56802387320927	2.12730840184044e-41	6.57701170371828e-40
ENSG00000183688	FAM101B	359845	family with sequence similarity 101, member B [Source:HGNC Symbol;Acc:HGNC:28705]	-1.56974686773794	2.22035931501513e-41	6.85397166053732e-40
ENSG00000076248	UNG	7374	uracil-DNA glycosylase [Source:HGNC Symbol;Acc:HGNC:12572]	-1.19323811850905	2.35374953399839e-41	7.25439559963685e-40
ENSG00000126457	PRMT1	3276	protein arginine methyltransferase 1 [Source:HGNC Symbol;Acc:HGNC:5187]	-1.21223005749538	2.3954566510637e-41	7.37143950131066e-40
ENSG00000147874	HAUS6	54801	HAUS augmin-like complex, subunit 6 [Source:HGNC Symbol;Acc:HGNC:25948]	-1.23322870759708	2.48927298329397e-41	7.64822349268362e-40
ENSG00000274180	NATD1	256302	N-acetyltransferase domain containing 1 [Source:HGNC Symbol;Acc:HGNC:30770]	2.12197548183943	2.50640065731784e-41	7.68888996676571e-40
ENSG00000134258	VTCN1	79679	V-set domain containing T cell activation inhibitor 1 [Source:HGNC Symbol;Acc:HGNC:28873]	4.02035504210029	2.9721846030947e-41	9.10364015794402e-40
ENSG00000079462	PAFAH1B3	5050	platelet-activating factor acetylhydrolase 1b, catalytic subunit 3 (29kDa) [Source:HGNC Symbol;Acc:HGNC:8576]	-1.32618144950585	3.03556727172283e-41	9.28338498764027e-40
ENSG00000116161	CACYBP	27101	calcyclin binding protein [Source:HGNC Symbol;Acc:HGNC:30423]	-1.27079154371212	3.49754239059092e-41	1.06796673057982e-39
ENSG00000137501	SYTL2	54843	synaptotagmin-like 2 [Source:HGNC Symbol;Acc:HGNC:15585]	1.77795140269199	3.63093162861532e-41	1.10698588356365e-39
ENSG00000183479	TREX2	11219	three prime repair exonuclease 2 [Source:HGNC Symbol;Acc:HGNC:12270]	-1.56219971219141	3.64475320460483e-41	1.10948758567293e-39
ENSG00000139343	SNRPF	6636	small nuclear ribonucleoprotein polypeptide F [Source:HGNC Symbol;Acc:HGNC:11162]	-1.36980705973038	4.19196790871402e-41	1.27410027699314e-39
ENSG00000147592	LACTB2	51110	lactamase, beta 2 [Source:HGNC Symbol;Acc:HGNC:18512]	1.11542097878556	4.32889323605701e-41	1.31369607943997e-39
ENSG00000070814	TCOF1	6949	Treacher Collins-Franceschetti syndrome 1 [Source:HGNC Symbol;Acc:HGNC:11654]	-1.44918892943185	4.4518296021989e-41	1.34893168130432e-39
ENSG00000172167	MTBP	27085	MDM2 binding protein [Source:HGNC Symbol;Acc:HGNC:7417]	-1.68322033863688	4.50642508888453e-41	1.36338336992347e-39
ENSG00000140464	PML	5371	promyelocytic leukemia [Source:HGNC Symbol;Acc:HGNC:9113]	1.52538967653953	5.72982278174711e-41	1.73086206232716e-39
ENSG00000130204	TOMM40	10452	translocase of outer mitochondrial membrane 40 homolog (yeast) [Source:HGNC Symbol;Acc:HGNC:18001]	-1.29962236738902	6.12727483041441e-41	1.84809834426973e-39
ENSG00000108055	SMC3	9126	structural maintenance of chromosomes 3 [Source:HGNC Symbol;Acc:HGNC:2468]	-1.18849666437428	6.46671493799597e-41	1.94750640724159e-39
ENSG00000068079	IFI35	3430	interferon-induced protein 35 [Source:HGNC Symbol;Acc:HGNC:5399]	1.40881376414791	7.53588000473299e-41	2.26604026443691e-39
ENSG00000213186	TRIM59	286827	tripartite motif containing 59 [Source:HGNC Symbol;Acc:HGNC:30834]	-1.57564403184808	8.12607142103033e-41	2.43979737072759e-39
ENSG00000188229	TUBB4B	10383	tubulin, beta 4B class IVb [Source:HGNC Symbol;Acc:HGNC:20771]	-1.65904017292518	9.22163729882285e-41	2.7645321164726e-39
ENSG00000067167	TRAM1	23471	translocation associated membrane protein 1 [Source:HGNC Symbol;Acc:HGNC:20568]	1.62452105973157	9.53727871162746e-41	2.85482542768049e-39
ENSG00000048392	RRM2B	50484	ribonucleotide reductase M2 B (TP53 inducible) [Source:HGNC Symbol;Acc:HGNC:17296]	1.13128055012766	1.05406725244579e-40	3.1504013070074e-39
ENSG00000095002	MSH2	4436	mutS homolog 2 [Source:HGNC Symbol;Acc:HGNC:7325]	-1.20121043830795	1.49376420752842e-40	4.45782563201382e-39
ENSG00000124006	OBSL1	23363	obscurin-like 1 [Source:HGNC Symbol;Acc:HGNC:29092]	1.22039668128834	1.58889613284868e-40	4.73457496237684e-39
ENSG00000244242	IFITM10	402778	interferon induced transmembrane protein 10 [Source:HGNC Symbol;Acc:HGNC:40022]	2.08932944797726	1.72168197331241e-40	5.12252244951203e-39
ENSG00000103495	MAZ	4150	MYC-associated zinc finger protein (purine-binding transcription factor) [Source:HGNC Symbol;Acc:HGNC:6914]	-1.22626377960313	2.23685441739837e-40	6.64530764964244e-39
ENSG00000128591	FLNC	2318	filamin C, gamma [Source:HGNC Symbol;Acc:HGNC:3756]	2.81996716696934	2.56937384525698e-40	7.62170415719174e-39
ENSG00000177106	EPS8L2	64787	EPS8-like 2 [Source:HGNC Symbol;Acc:HGNC:21296]	1.19751198152317	2.61225381069687e-40	7.73728430046887e-39
ENSG00000136159	NUDT15	55270	nudix (nucleoside diphosphate linked moiety X)-type motif 15 [Source:HGNC Symbol;Acc:HGNC:23063]	-1.46564899596952	2.80760401219905e-40	8.30344683607852e-39
ENSG00000156509	FBXO43	286151	F-box protein 43 [Source:HGNC Symbol;Acc:HGNC:28521]	-2.84171019051441	3.19857976072159e-40	9.44561162224451e-39
ENSG00000261236	BOP1	23246	block of proliferation 1 [Source:HGNC Symbol;Acc:HGNC:15519]	-1.33980763158766	3.25185592924883e-40	9.58860682660297e-39
ENSG00000179222	MAGED1	9500	melanoma antigen family D1 [Source:HGNC Symbol;Acc:HGNC:6813]	1.11744559511589	5.02321496158379e-40	1.47896624114828e-38
ENSG00000260912		NA		2.11689198811834	5.23753807953689e-40	1.53977384374004e-38
ENSG00000075399	VPS9D1	9605	VPS9 domain containing 1 [Source:HGNC Symbol;Acc:HGNC:13526]	1.613714835504	6.54152978911198e-40	1.92027433155566e-38
ENSG00000183010	PYCR1	5831	pyrroline-5-carboxylate reductase 1 [Source:HGNC Symbol;Acc:HGNC:9721]	-1.2034019037187	6.70438550496823e-40	1.96516083139692e-38
ENSG00000180573	HIST1H2AC	8334	histone cluster 1, H2ac [Source:HGNC Symbol;Acc:HGNC:4733]	-1.47497472253187	6.79534231531886e-40	1.98887085602132e-38
ENSG00000280755		3431	Sp110 nuclear body protein [Source:UniProtKB/Swiss-Prot;Acc:Q9HB58]	1.66721177359169	8.34632666978159e-40	2.43920162260658e-38
ENSG00000135968	GCC2	9648	GRIP and coiled-coil domain containing 2 [Source:HGNC Symbol;Acc:HGNC:23218]	1.13947122143341	1.200706632424e-39	3.50386414034985e-38
ENSG00000203812	HIST2H2AA3	8337	histone cluster 2, H2aa3 [Source:HGNC Symbol;Acc:HGNC:4736]	-3.0191243701906	1.7260611483611e-39	5.02950797153716e-38
ENSG00000104774	MAN2B1	4125	mannosidase, alpha, class 2B, member 1 [Source:HGNC Symbol;Acc:HGNC:6826]	1.25274979948147	1.91843741809205e-39	5.57535516786033e-38
ENSG00000102287	GABRE	2564	gamma-aminobutyric acid (GABA) A receptor, epsilon [Source:HGNC Symbol;Acc:HGNC:4085]	1.88281364911941	1.91903295917444e-39	5.57535516786033e-38
ENSG00000161513	FDXR	2232	ferredoxin reductase [Source:HGNC Symbol;Acc:HGNC:3642]	1.12753106434029	1.92552341594273e-39	5.58599715203592e-38
ENSG00000236824	BCYRN1	NA	brain cytoplasmic RNA 1 [Source:HGNC Symbol;Acc:HGNC:1022]	-1.44501049166078	2.12202191702504e-39	6.14701832738221e-38
ENSG00000095319	NUP188	23511	nucleoporin 188kDa [Source:HGNC Symbol;Acc:HGNC:17859]	-1.21944636039592	2.85299133688969e-39	8.25237142775881e-38
ENSG00000170921	TANC2	26115	tetratricopeptide repeat, ankyrin repeat and coiled-coil containing 2 [Source:HGNC Symbol;Acc:HGNC:30212]	1.32206890673883	3.80472958449e-39	1.09892160337989e-37
ENSG00000139133	ALG10	84920	ALG10, alpha-1,2-glucosyltransferase [Source:HGNC Symbol;Acc:HGNC:23162]	-1.48284940295071	3.82863016818501e-39	1.10421047595129e-37
ENSG00000101335	MYL9	10398	myosin, light chain 9, regulatory [Source:HGNC Symbol;Acc:HGNC:15754]	3.64522274394084	3.88671084180171e-39	1.11932739636494e-37
ENSG00000168062	BATF2	116071	basic leucine zipper transcription factor, ATF-like 2 [Source:HGNC Symbol;Acc:HGNC:25163]	2.79950945768425	4.56139128826717e-39	1.31171537541494e-37
ENSG00000153294	ADGRF4	221393	adhesion G protein-coupled receptor F4 [Source:HGNC Symbol;Acc:HGNC:19011]	1.66734038151857	4.85703921513702e-39	1.39470445834661e-37
ENSG00000060688	SNRNP40	9410	small nuclear ribonucleoprotein 40kDa (U5) [Source:HGNC Symbol;Acc:HGNC:30857]	-1.31773234254059	5.04547575807345e-39	1.4467114524891e-37
ENSG00000129484	PARP2	10038	poly (ADP-ribose) polymerase 2 [Source:HGNC Symbol;Acc:HGNC:272]	-1.27782149418916	5.45895528087854e-39	1.56300174679763e-37
ENSG00000105447	GRWD1	83743	glutamate-rich WD repeat containing 1 [Source:HGNC Symbol;Acc:HGNC:21270]	-1.26793063254453	5.76050699575158e-39	1.64695479317031e-37
ENSG00000173559	NABP1	64859	nucleic acid binding protein 1 [Source:HGNC Symbol;Acc:HGNC:26232]	1.6725542952348	6.15430506839836e-39	1.75700073600113e-37
ENSG00000169903	TM4SF4	7104	transmembrane 4 L six family member 4 [Source:HGNC Symbol;Acc:HGNC:11856]	2.00279346436604	8.08142060721642e-39	2.30384625564456e-37
ENSG00000070371	CLTCL1	8218	clathrin, heavy chain-like 1 [Source:HGNC Symbol;Acc:HGNC:2093]	1.34330893991008	1.01771467320905e-38	2.89711398903717e-37
ENSG00000112877	CEP72	55722	centrosomal protein 72kDa [Source:HGNC Symbol;Acc:HGNC:25547]	-1.67890244262286	1.08983863997591e-38	3.09796434120347e-37
ENSG00000164754	RAD21	5885	RAD21 homolog (S. pombe) [Source:HGNC Symbol;Acc:HGNC:9811]	-1.21010433556335	1.25689524585468e-38	3.5677043788944e-37
ENSG00000196290	NIF3L1	60491	NIF3 NGG1 interacting factor 3-like 1 (S. cerevisiae) [Source:HGNC Symbol;Acc:HGNC:13390]	-1.23121033368667	1.3620316129569e-38	3.860587739681e-37
ENSG00000171223	JUNB	3726	jun B proto-oncogene [Source:HGNC Symbol;Acc:HGNC:6205]	1.50922305005199	2.19570980453012e-38	6.21467663299385e-37
ENSG00000115129	TP53I3	9540	tumor protein p53 inducible protein 3 [Source:HGNC Symbol;Acc:HGNC:19373]	1.37881881674737	2.33966984925914e-38	6.61266345378593e-37
ENSG00000107833	NPM3	10360	nucleophosmin/nucleoplasmin 3 [Source:HGNC Symbol;Acc:HGNC:7931]	-1.53425206648275	2.47034901097883e-38	6.9720307229854e-37
ENSG00000149929	HIRIP3	8479	HIRA interacting protein 3 [Source:HGNC Symbol;Acc:HGNC:4917]	-1.93254482185773	2.63690676283092e-38	7.43148787539053e-37
ENSG00000178947	SMIM10L2A	NA	small integral membrane protein 10 like 2A [Source:HGNC Symbol;Acc:HGNC:34499]	2.6533488445595	2.97699956405649e-38	8.37800618055555e-37
ENSG00000196923	PDLIM7	9260	PDZ and LIM domain 7 (enigma) [Source:HGNC Symbol;Acc:HGNC:22958]	1.98012672370214	3.40628404948601e-38	9.57248188928104e-37
ENSG00000107672	NSMCE4A	54780	non-SMC element 4 homolog A (S. cerevisiae) [Source:HGNC Symbol;Acc:HGNC:25935]	-1.17066890945064	3.97613090903696e-38	1.1158017363485e-36
ENSG00000182481	KPNA2	3838	karyopherin alpha 2 (RAG cohort 1, importin alpha 1) [Source:HGNC Symbol;Acc:HGNC:6395]	-1.57755820301397	5.24886161602687e-38	1.47087248349258e-36
ENSG00000183778	B3GALT5	10317	UDP-Gal:betaGlcNAc beta 1,3-galactosyltransferase, polypeptide 5 [Source:HGNC Symbol;Acc:HGNC:920]	2.21653361986385	5.88200097082995e-38	1.64596049829627e-36
ENSG00000169031	COL4A3	1285	collagen, type IV, alpha 3 (Goodpasture antigen) [Source:HGNC Symbol;Acc:HGNC:2204]	2.2079546725809	5.95136740746226e-38	1.66301576381647e-36
ENSG00000142661	MYOM3	127294	myomesin 3 [Source:HGNC Symbol;Acc:HGNC:26679]	1.46433439665426	6.41167781334792e-38	1.78911167910313e-36
ENSG00000074416	MGLL	11343	monoglyceride lipase [Source:HGNC Symbol;Acc:HGNC:17038]	1.15470772319679	7.14248958650433e-38	1.99022601228462e-36
ENSG00000171680	PLEKHG5	57449	pleckstrin homology domain containing, family G (with RhoGef domain) member 5 [Source:HGNC Symbol;Acc:HGNC:29105]	2.20086939576848	7.58618883885042e-38	2.11088375634266e-36
ENSG00000125319	C17orf53	78995	chromosome 17 open reading frame 53 [Source:HGNC Symbol;Acc:HGNC:28460]	-1.88436539138465	8.37345204366804e-38	2.32666552144453e-36
ENSG00000170779	CDCA4	55038	cell division cycle associated 4 [Source:HGNC Symbol;Acc:HGNC:14625]	-1.48987605019716	1.21037791199037e-37	3.35845871197778e-36
ENSG00000197565	COL4A6	1288	collagen, type IV, alpha 6 [Source:HGNC Symbol;Acc:HGNC:2208]	1.50095546489114	1.26898156813129e-37	3.51612901262296e-36
ENSG00000123080	CDKN2C	1031	cyclin-dependent kinase inhibitor 2C (p18, inhibits CDK4) [Source:HGNC Symbol;Acc:HGNC:1789]	-1.81001823987608	1.33854756433566e-37	3.70368987129067e-36
ENSG00000101265	RASSF2	9770	Ras association (RalGDS/AF-6) domain family member 2 [Source:HGNC Symbol;Acc:HGNC:9883]	1.216681534231	1.41475544004207e-37	3.90907810817778e-36
ENSG00000178921	PFAS	5198	phosphoribosylformylglycinamidine synthase [Source:HGNC Symbol;Acc:HGNC:8863]	-1.24155836796748	1.41954942655781e-37	3.91684615517821e-36
ENSG00000128973	CLN6	54982	ceroid-lipofuscinosis, neuronal 6, late infantile, variant [Source:HGNC Symbol;Acc:HGNC:2077]	-1.313266397926	1.46311937112347e-37	4.03143462983477e-36
ENSG00000128059	PPAT	5471	phosphoribosyl pyrophosphate amidotransferase [Source:HGNC Symbol;Acc:HGNC:9238]	-1.15930453664444	2.07873861034795e-37	5.71971587549222e-36
ENSG00000130363	RSPH3	83861	radial spoke 3 homolog (Chlamydomonas) [Source:HGNC Symbol;Acc:HGNC:21054]	1.5015308376554	2.41277174043525e-37	6.62958532740456e-36
ENSG00000161547	SRSF2	6427	serine/arginine-rich splicing factor 2 [Source:HGNC Symbol;Acc:HGNC:10783]	-1.12876033398756	2.55881384408602e-37	7.02110087552269e-36
ENSG00000215481	BCRP3	NA	breakpoint cluster region pseudogene 3 [Source:HGNC Symbol;Acc:HGNC:1016]	2.55233022033699	2.76089715802075e-37	7.56508796863495e-36
ENSG00000166788	SAAL1	113174	serum amyloid A-like 1 [Source:HGNC Symbol;Acc:HGNC:25158]	-1.24322219629598	2.9059648816265e-37	7.95155709160846e-36
ENSG00000148180	GSN	2934	gelsolin [Source:HGNC Symbol;Acc:HGNC:4620]	1.18219413087073	3.29128884781926e-37	8.99345815733295e-36
ENSG00000158125	XDH	7498	xanthine dehydrogenase [Source:HGNC Symbol;Acc:HGNC:12805]	2.5136480651091	4.25782533721404e-37	1.16184526743095e-35
ENSG00000065618	COL17A1	1308	collagen, type XVII, alpha 1 [Source:HGNC Symbol;Acc:HGNC:2194]	2.88967929278963	4.59353480274327e-37	1.25172239397236e-35
ENSG00000212498	SNORD86	692201	small nucleolar RNA, C/D box 86 [Source:HGNC Symbol;Acc:HGNC:32745]	-1.61400644812577	4.70476864361877e-37	1.28026734605141e-35
ENSG00000100410	PHF5A	84844	PHD finger protein 5A [Source:HGNC Symbol;Acc:HGNC:18000]	-1.38276455300793	4.8048025551454e-37	1.30569022392645e-35
ENSG00000261150	EPPK1	83481	epiplakin 1 [Source:HGNC Symbol;Acc:HGNC:15577]	3.31749257255613	4.81522180752264e-37	1.30672420370079e-35
ENSG00000130935	NOL11	25926	nucleolar protein 11 [Source:HGNC Symbol;Acc:HGNC:24557]	-1.05989770771107	5.19422339513748e-37	1.40764166521723e-35
ENSG00000149591	TAGLN	6876	transgelin [Source:HGNC Symbol;Acc:HGNC:11553]	3.16273096477932	5.29285416846144e-37	1.43240584865924e-35
ENSG00000172115	CYCS	54205	cytochrome c, somatic [Source:HGNC Symbol;Acc:HGNC:19986]	-1.22835822389449	5.44767670861291e-37	1.472288660128e-35
ENSG00000077312	SNRPA	6626	small nuclear ribonucleoprotein polypeptide A [Source:HGNC Symbol;Acc:HGNC:11151]	-1.04295272544842	5.63152797131263e-37	1.51989708471656e-35
ENSG00000138750	NUP54	53371	nucleoporin 54kDa [Source:HGNC Symbol;Acc:HGNC:17359]	-1.20839940466379	6.27054940368456e-37	1.69005421581436e-35
ENSG00000196586	MYO6	4646	myosin VI [Source:HGNC Symbol;Acc:HGNC:7605]	1.06629949083055	6.62312742133738e-37	1.78264993645697e-35
ENSG00000130635	COL5A1	1289	collagen, type V, alpha 1 [Source:HGNC Symbol;Acc:HGNC:2209]	2.12273612902362	8.68698619354201e-37	2.33496733659342e-35
ENSG00000079385	CEACAM1	634	carcinoembryonic antigen-related cell adhesion molecule 1 (biliary glycoprotein) [Source:HGNC Symbol;Acc:HGNC:1814]	2.46197784526269	1.0566248811297e-36	2.83623385211935e-35
ENSG00000147394	ZNF185	7739	zinc finger protein 185 (LIM domain) [Source:HGNC Symbol;Acc:HGNC:12976]	1.57913800571213	1.06768052287704e-36	2.86202122251817e-35
ENSG00000204941	PSG5	5671,5673	pregnancy specific beta-1-glycoprotein 5 [Source:HGNC Symbol;Acc:HGNC:9522]	3.41083600346945	1.26847562622492e-36	3.39543446005864e-35
ENSG00000137491	SLCO2B1	11309	solute carrier organic anion transporter family, member 2B1 [Source:HGNC Symbol;Acc:HGNC:10962]	2.09526508243354	1.27010835492171e-36	3.39543446005864e-35
ENSG00000108559	NUP88	4927	nucleoporin 88kDa [Source:HGNC Symbol;Acc:HGNC:8067]	-1.08863622424198	1.52423124213223e-36	4.06928546210328e-35
ENSG00000176225	RTTN	25914	rotatin [Source:HGNC Symbol;Acc:HGNC:18654]	-1.19438824731778	1.64152496114301e-36	4.37651378304202e-35
ENSG00000106628	POLD2	5425	polymerase (DNA directed), delta 2, accessory subunit [Source:HGNC Symbol;Acc:HGNC:9176]	-1.2135909123159	1.70979359694197e-36	4.55238305945898e-35
ENSG00000127337	YEATS4	8089	YEATS domain containing 4 [Source:HGNC Symbol;Acc:HGNC:24859]	-1.30529522614264	2.11574126657529e-36	5.62565066789523e-35
ENSG00000162738	VANGL2	57216	VANGL planar cell polarity protein 2 [Source:HGNC Symbol;Acc:HGNC:15511]	2.12665174756995	2.54020218552793e-36	6.74519279264647e-35
ENSG00000139112	GABARAPL1	23710	GABA(A) receptor-associated protein like 1 [Source:HGNC Symbol;Acc:HGNC:4068]	1.08095525947052	2.75564606648146e-36	7.30745552877957e-35
ENSG00000166483	WEE1	7465	WEE1 G2 checkpoint kinase [Source:HGNC Symbol;Acc:HGNC:12761]	-1.3396650859178	2.8334130883349e-36	7.50360710095767e-35
ENSG00000148229	POLE3	54107	polymerase (DNA directed), epsilon 3, accessory subunit [Source:HGNC Symbol;Acc:HGNC:13546]	-1.44317468009161	2.8516604026078e-36	7.54182100587949e-35
ENSG00000135069	PSAT1	29968	phosphoserine aminotransferase 1 [Source:HGNC Symbol;Acc:HGNC:19129]	-1.15548806971045	3.08018860823824e-36	8.13532167705276e-35
ENSG00000172890	NADSYN1	55191	NAD synthetase 1 [Source:HGNC Symbol;Acc:HGNC:29832]	1.10888116177145	3.67513938183431e-36	9.69373212650448e-35
ENSG00000156298	TSPAN7	7102	tetraspanin 7 [Source:HGNC Symbol;Acc:HGNC:11854]	2.37948905531327	3.7534323246953e-36	9.88704120089072e-35
ENSG00000141552	ANAPC11	51529	anaphase promoting complex subunit 11 [Source:HGNC Symbol;Acc:HGNC:14452]	-1.17870474369263	3.95345155589286e-36	1.04000517893767e-34
ENSG00000107099	DOCK8	81704	dedicator of cytokinesis 8 [Source:HGNC Symbol;Acc:HGNC:19191]	2.34444283977661	4.42806223213946e-36	1.16330847683706e-34
ENSG00000159199	ATP5G1	516	ATP synthase, H+ transporting, mitochondrial Fo complex, subunit C1 (subunit 9) [Source:HGNC Symbol;Acc:HGNC:841]	-1.08663306746319	5.26060017817918e-36	1.38019146241843e-34
ENSG00000137054	POLR1E	64425	polymerase (RNA) I polypeptide E, 53kDa [Source:HGNC Symbol;Acc:HGNC:17631]	-1.28717074235759	6.46430542692116e-36	1.69375090204581e-34
ENSG00000140488	CELF6	60677	CUGBP, Elav-like family member 6 [Source:HGNC Symbol;Acc:HGNC:14059]	4.02766895521648	8.91105881174402e-36	2.33174672695119e-34
ENSG00000242265	PEG10	23089	paternally expressed 10 [Source:HGNC Symbol;Acc:HGNC:14005]	-1.28756765765281	1.02142476933907e-35	2.66921530992891e-34
ENSG00000130707	ASS1	445	argininosuccinate synthase 1 [Source:HGNC Symbol;Acc:HGNC:758]	1.98968841579164	1.32156160916622e-35	3.44897901594292e-34
ENSG00000141429	GALNT1	2589	polypeptide N-acetylgalactosaminyltransferase 1 [Source:HGNC Symbol;Acc:HGNC:4123]	1.18803875767837	1.43706328020745e-35	3.74546466540611e-34
ENSG00000114270	COL7A1	1294	collagen, type VII, alpha 1 [Source:HGNC Symbol;Acc:HGNC:2214]	1.78407341669335	1.45012135075872e-35	3.77451876226472e-34
ENSG00000224126	UBE2SP2	NA	ubiquitin-conjugating enzyme E2S pseudogene 2 [Source:HGNC Symbol;Acc:HGNC:32196]	-2.73931382366012	1.53163787663942e-35	3.98145235406426e-34
ENSG00000173846	PLK3	1263	polo-like kinase 3 [Source:HGNC Symbol;Acc:HGNC:2154]	1.39089555404468	1.57141562825232e-35	4.07948582808841e-34
ENSG00000123989	CHPF	79586	chondroitin polymerizing factor [Source:HGNC Symbol;Acc:HGNC:24291]	1.57770100755743	1.9843204506306e-35	5.14465023919397e-34
ENSG00000174938	SEZ6L2	26470	seizure related 6 homolog (mouse)-like 2 [Source:HGNC Symbol;Acc:HGNC:30844]	1.44996696472743	2.03503817606678e-35	5.26922859847645e-34
ENSG00000171798	KNDC1	85442	kinase non-catalytic C-lobe domain (KIND) containing 1 [Source:HGNC Symbol;Acc:HGNC:29374]	2.21518782432539	2.11814325050954e-35	5.47723011218149e-34
ENSG00000163644	PPM1K	152926	protein phosphatase, Mg2+/Mn2+ dependent, 1K [Source:HGNC Symbol;Acc:HGNC:25415]	2.14863884980287	2.18122378391739e-35	5.63297478105516e-34
ENSG00000163923	RPL39L	116832	ribosomal protein L39-like [Source:HGNC Symbol;Acc:HGNC:17094]	-1.73357486211688	2.31510122104747e-35	5.97090596906185e-34
ENSG00000257767		NA	Uncharacterized protein [Source:UniProtKB/TrEMBL;Acc:F8VP50]	1.19992748350503	2.45109912217457e-35	6.31341776501704e-34
ENSG00000088305	DNMT3B	1789	DNA (cytosine-5-)-methyltransferase 3 beta [Source:HGNC Symbol;Acc:HGNC:2979]	-1.35150503859891	2.86726620114959e-35	7.3757436288947e-34
ENSG00000169297	NR0B1	190	nuclear receptor subfamily 0, group B, member 1 [Source:HGNC Symbol;Acc:HGNC:7960]	-1.35754260534722	3.25692827157949e-35	8.36721390550383e-34
ENSG00000167861	HID1	283987	HID1 domain containing [Source:HGNC Symbol;Acc:HGNC:15736]	1.38589417891965	3.46036097975014e-35	8.87829759947322e-34
ENSG00000181634	TNFSF15	9966	tumor necrosis factor (ligand) superfamily, member 15 [Source:HGNC Symbol;Acc:HGNC:11931]	2.09629618503416	3.47485015401441e-35	8.90390916247843e-34
ENSG00000205978	NYNRIN	57523	NYN domain and retroviral integrase containing [Source:HGNC Symbol;Acc:HGNC:20165]	2.87634088191147	3.60966641572673e-35	9.22939846034904e-34
ENSG00000163491	NEK10	152110	NIMA-related kinase 10 [Source:HGNC Symbol;Acc:HGNC:18592]	1.86060128311177	3.61121938137771e-35	9.22939846034904e-34
ENSG00000197977	ELOVL2	54898	ELOVL fatty acid elongase 2 [Source:HGNC Symbol;Acc:HGNC:14416]	-1.49829776467252	3.81471096258455e-35	9.73687723214733e-34
ENSG00000134291	TMEM106C	79022	transmembrane protein 106C [Source:HGNC Symbol;Acc:HGNC:28775]	-1.13046196978802	4.00908707543894e-35	1.02198095822415e-33
ENSG00000186283	TOR3A	64222	torsin family 3, member A [Source:HGNC Symbol;Acc:HGNC:11997]	-1.16099790756409	4.3745482223696e-35	1.11370585929296e-33
ENSG00000093000	NUP50	10762	nucleoporin 50kDa [Source:HGNC Symbol;Acc:HGNC:8065]	-1.13151145291852	4.54696010399395e-35	1.15610995900263e-33
ENSG00000122483	CCDC18	343099	coiled-coil domain containing 18 [Source:HGNC Symbol;Acc:HGNC:30370]	-1.35574095219045	5.27289891814813e-35	1.33896389494774e-33
ENSG00000117899	MESDC2	23184	mesoderm development candidate 2 [Source:HGNC Symbol;Acc:HGNC:13520]	-1.07105008805515	5.5984872661922e-35	1.41981661657116e-33
ENSG00000166033	HTRA1	5654	HtrA serine peptidase 1 [Source:HGNC Symbol;Acc:HGNC:9476]	1.11898194614728	7.9334556997331e-35	2.00940193338368e-33
ENSG00000139921	TMX1	81542	thioredoxin-related transmembrane protein 1 [Source:HGNC Symbol;Acc:HGNC:15487]	-1.01389448808879	8.23873393801282e-35	2.08405157079874e-33
ENSG00000130826	DKC1	1736	dyskeratosis congenita 1, dyskerin [Source:HGNC Symbol;Acc:HGNC:2890]	-1.32921030235422	8.79311573289703e-35	2.22144238387613e-33
ENSG00000131238	PPT1	5538	palmitoyl-protein thioesterase 1 [Source:HGNC Symbol;Acc:HGNC:9325]	-1.16378373796535	8.8094685163623e-35	2.22273129002878e-33
ENSG00000141543	EIF4A3	9775	eukaryotic translation initiation factor 4A3 [Source:HGNC Symbol;Acc:HGNC:18683]	-1.14308794045276	8.87756474488666e-35	2.23705572831608e-33
ENSG00000105968	H2AFV	94239	H2A histone family, member V [Source:HGNC Symbol;Acc:HGNC:20664]	-1.1514806073764	9.42356251902398e-35	2.37161657485144e-33
ENSG00000117118	SDHB	6390	succinate dehydrogenase complex, subunit B, iron sulfur (Ip) [Source:HGNC Symbol;Acc:HGNC:10681]	-1.11798576439364	9.62122958556081e-35	2.41828259150559e-33
ENSG00000262903		NA		1.91498720587234	1.04834473632993e-34	2.63165166593826e-33
ENSG00000119333	WDR34	89891	WD repeat domain 34 [Source:HGNC Symbol;Acc:HGNC:28296]	-1.14400807761184	1.1675264053664e-34	2.92711315538307e-33
ENSG00000183111	ARHGEF37	389337	Rho guanine nucleotide exchange factor (GEF) 37 [Source:HGNC Symbol;Acc:HGNC:34430]	1.81824482550777	1.27771660370774e-34	3.19931168857417e-33
ENSG00000171345	KRT19	3880	keratin 19, type I [Source:HGNC Symbol;Acc:HGNC:6436]	1.53480084495228	1.29960583062501e-34	3.25000161896554e-33
ENSG00000168918	INPP5D	3635	inositol polyphosphate-5-phosphatase, 145kDa [Source:HGNC Symbol;Acc:HGNC:6079]	2.96930239013196	1.340080597807e-34	3.34698259042669e-33
ENSG00000060718	COL11A1	1301	collagen, type XI, alpha 1 [Source:HGNC Symbol;Acc:HGNC:2186]	1.39684104657276	1.39146352824434e-34	3.47092846767615e-33
ENSG00000237975	FLG-AS1	339400	FLG antisense RNA 1 [Source:HGNC Symbol;Acc:HGNC:27913]	2.20883326804265	1.40791566504901e-34	3.50753869844998e-33
ENSG00000119787	ATL2	64225	atlastin GTPase 2 [Source:HGNC Symbol;Acc:HGNC:24047]	-0.999211545426919	1.50370138960907e-34	3.74145146764694e-33
ENSG00000116062	MSH6	2956	mutS homolog 6 [Source:HGNC Symbol;Acc:HGNC:7329]	-1.15533454486611	1.51922203216604e-34	3.77531452421035e-33
ENSG00000166582	CENPV	201161	centromere protein V [Source:HGNC Symbol;Acc:HGNC:29920]	-1.10692731033379	1.53298457593049e-34	3.80472905553803e-33
ENSG00000006611	USH1C	10083	Usher syndrome 1C [Source:HGNC Symbol;Acc:HGNC:12597]	2.48667629146804	1.62738083487785e-34	4.03394426271604e-33
ENSG00000137868	STRA6	64220	stimulated by retinoic acid 6 [Source:HGNC Symbol;Acc:HGNC:30650]	1.17209961084593	1.66696349887511e-34	4.12688356939556e-33
ENSG00000197451	HNRNPAB	3182	heterogeneous nuclear ribonucleoprotein A/B [Source:HGNC Symbol;Acc:HGNC:5034]	-1.219812857877	1.69508257731151e-34	4.19124548152267e-33
ENSG00000261069		NA		1.47074260951203	1.78693989231716e-34	4.41284806407722e-33
ENSG00000163428	LRRC58	116064	leucine rich repeat containing 58 [Source:HGNC Symbol;Acc:HGNC:26968]	-1.13657727550228	1.85441332391669e-34	4.57375650777756e-33
ENSG00000111331	OAS3	4940	2'-5'-oligoadenylate synthetase 3, 100kDa [Source:HGNC Symbol;Acc:HGNC:8088]	1.20736011788864	1.92606145678141e-34	4.74454739902413e-33
ENSG00000185347	C14orf80	283643	chromosome 14 open reading frame 80 [Source:HGNC Symbol;Acc:HGNC:20127]	-1.45724341708063	1.96199570393642e-34	4.82704696475317e-33
ENSG00000183044	ABAT	18	4-aminobutyrate aminotransferase [Source:HGNC Symbol;Acc:HGNC:23]	2.90650421658596	2.18323370297028e-34	5.36467226814438e-33
ENSG00000230330	HMGN2P3	NA	high mobility group nucleosomal binding domain 2 pseudogene 3 [Source:HGNC Symbol;Acc:HGNC:33566]	-1.81123122451623	2.22037204896664e-34	5.44915157756335e-33
ENSG00000154429	CCSAP	126731	centriole, cilia and spindle-associated protein [Source:HGNC Symbol;Acc:HGNC:29578]	-1.29552823896048	2.23152628544686e-34	5.46973117807546e-33
ENSG00000214391	TUBAP2	NA	tubulin, alpha pseudogene 2 [Source:HGNC Symbol;Acc:HGNC:14531]	-1.94049184015545	2.66502304577832e-34	6.52418776857455e-33
ENSG00000126749	EMG1	10436	EMG1 N1-specific pseudouridine methyltransferase [Source:HGNC Symbol;Acc:HGNC:16912]	-1.04042921893685	2.85451163838227e-34	6.979422268302e-33
ENSG00000225950	NTF4	4909	neurotrophin 4 [Source:HGNC Symbol;Acc:HGNC:8024]	3.07062062296783	2.92707150944035e-34	7.14798822503134e-33
ENSG00000152137	HSPB8	26353	heat shock 22kDa protein 8 [Source:HGNC Symbol;Acc:HGNC:30171]	1.48863643689592	3.36189878350355e-34	8.19971263788842e-33
ENSG00000188976	NOC2L	26155	nucleolar complex associated 2 homolog (S. cerevisiae) [Source:HGNC Symbol;Acc:HGNC:24517]	-1.08339108557233	3.50171115928044e-34	8.53018565508561e-33
ENSG00000143977	SNRPG	6637	small nuclear ribonucleoprotein polypeptide G [Source:HGNC Symbol;Acc:HGNC:11163]	-1.19317155471624	3.73685434012528e-34	9.09178501767427e-33
ENSG00000101773	RBBP8	5932	retinoblastoma binding protein 8 [Source:HGNC Symbol;Acc:HGNC:9891]	-1.19001792155625	3.77215134381112e-34	9.16637416338652e-33
ENSG00000117395	EBNA1BP2	10969	EBNA1 binding protein 2 [Source:HGNC Symbol;Acc:HGNC:15531]	-1.10061924104456	3.85381486281075e-34	9.35331282920014e-33
ENSG00000116120	FARSB	10056	phenylalanyl-tRNA synthetase, beta subunit [Source:HGNC Symbol;Acc:HGNC:17800]	-1.1874760961078	4.23902445966033e-34	1.02756033404969e-32
ENSG00000198546	ZNF511	118472	zinc finger protein 511 [Source:HGNC Symbol;Acc:HGNC:28445]	-1.3558439564955	4.24974179283567e-34	1.02889581935369e-32
ENSG00000115687	PASK	23178	PAS domain containing serine/threonine kinase [Source:HGNC Symbol;Acc:HGNC:17270]	-1.31262097073589	5.11918385871107e-34	1.23787755584695e-32
ENSG00000162814	SPATA17	128153	spermatogenesis associated 17 [Source:HGNC Symbol;Acc:HGNC:25184]	2.15683323375789	5.43309818174746e-34	1.31217955597314e-32
ENSG00000268439		NA	Uncharacterized protein [Source:UniProtKB/TrEMBL;Acc:V9GYP5]	-1.17412955612059	5.9946159540738e-34	1.44602726237707e-32
ENSG00000170540	ARL6IP1	23204	ADP-ribosylation factor-like 6 interacting protein 1 [Source:HGNC Symbol;Acc:HGNC:697]	-1.2170882621923	6.5007336951021e-34	1.5662011570785e-32
ENSG00000108561	C1QBP	708	complement component 1, q subcomponent binding protein [Source:HGNC Symbol;Acc:HGNC:1243]	-1.21829203812687	6.64189148880043e-34	1.59826075825507e-32
ENSG00000130695	CEP85	64793	centrosomal protein 85kDa [Source:HGNC Symbol;Acc:HGNC:25309]	-1.15361461163441	6.87275977610932e-34	1.65180343232136e-32
ENSG00000206527	HACD2	201562	3-hydroxyacyl-CoA dehydratase 2 [Source:HGNC Symbol;Acc:HGNC:9640]	-0.989084996610558	7.0534786347002e-34	1.69317769024468e-32
ENSG00000145730	PAM	5066	peptidylglycine alpha-amidating monooxygenase [Source:HGNC Symbol;Acc:HGNC:8596]	1.10383141537898	7.17612480384986e-34	1.72052817505895e-32
ENSG00000067798	NAV3	89795	neuron navigator 3 [Source:HGNC Symbol;Acc:HGNC:15998]	1.63531918776106	8.69386511986191e-34	2.08189090070293e-32
ENSG00000277161	PIGW	284098	phosphatidylinositol glycan anchor biosynthesis, class W [Source:HGNC Symbol;Acc:HGNC:23213]	-1.16036635500913	1.0330270819866e-33	2.47076065759411e-32
ENSG00000198924	DCLRE1A	9937	DNA cross-link repair 1A [Source:HGNC Symbol;Acc:HGNC:17660]	-1.05681913904239	1.03484951397322e-33	2.47212660194134e-32
ENSG00000272168	CASC15	401237	cancer susceptibility candidate 15 (non-protein coding) [Source:HGNC Symbol;Acc:HGNC:28245]	2.05795541375273	1.07003641800532e-33	2.55309655484458e-32
ENSG00000261578		NA		1.6627720027303	1.19751202588638e-33	2.85380549860209e-32
ENSG00000234745	HLA-B	3106	major histocompatibility complex, class I, B [Source:HGNC Symbol;Acc:HGNC:4932]	1.45753702754706	1.32044721162097e-33	3.1429825437089e-32
ENSG00000112343	TRIM38	10475	tripartite motif containing 38 [Source:HGNC Symbol;Acc:HGNC:10059]	1.1825736726433	1.42277961370105e-33	3.38248303830059e-32
ENSG00000171298	GAA	2548	glucosidase, alpha; acid [Source:HGNC Symbol;Acc:HGNC:4065]	1.11139433546006	1.43060944092366e-33	3.39700962919324e-32
ENSG00000115875	SRSF7	6432	serine/arginine-rich splicing factor 7 [Source:HGNC Symbol;Acc:HGNC:10789]	-1.12735451033001	1.44895965992856e-33	3.43645222587618e-32
ENSG00000069020	MAST4	375449	microtubule associated serine/threonine kinase family member 4 [Source:HGNC Symbol;Acc:HGNC:19037]	1.39312957280403	1.51311176802647e-33	3.58429689318117e-32
ENSG00000161544	CYGB	114757	cytoglobin [Source:HGNC Symbol;Acc:HGNC:16505]	2.89986926010164	1.51932074258271e-33	3.5946946814927e-32
ENSG00000177666	PNPLA2	57104	patatin-like phospholipase domain containing 2 [Source:HGNC Symbol;Acc:HGNC:30802]	1.18937335197378	1.53048289062471e-33	3.61677272573944e-32
ENSG00000007384	RHBDF1	64285	rhomboid 5 homolog 1 (Drosophila) [Source:HGNC Symbol;Acc:HGNC:20561]	1.22675944050755	1.67851419496051e-33	3.96185501023177e-32
ENSG00000116717	GADD45A	1647	growth arrest and DNA-damage-inducible, alpha [Source:HGNC Symbol;Acc:HGNC:4095]	1.71262155140524	1.7666458715315e-33	4.16489926467497e-32
ENSG00000257411		NA	Uncharacterized protein [Source:UniProtKB/TrEMBL;Acc:H0YIN7]	-1.1220283117998	1.80258841477113e-33	4.24456933518695e-32
ENSG00000145040	UCN2	90226	urocortin 2 [Source:HGNC Symbol;Acc:HGNC:18414]	2.22021345357065	1.99461851599155e-33	4.69115278594393e-32
ENSG00000186767	SPIN4	139886	spindlin family, member 4 [Source:HGNC Symbol;Acc:HGNC:27040]	-1.41856811512249	2.02442205327181e-33	4.75558645474886e-32
ENSG00000205403	CFI	3426	complement factor I [Source:HGNC Symbol;Acc:HGNC:5394]	3.27168995311228	2.35686324896877e-33	5.5299513475804e-32
ENSG00000273033		100129550		1.6157754641715	2.82889073116376e-33	6.62960442287915e-32
ENSG00000174547	MRPL11	65003	mitochondrial ribosomal protein L11 [Source:HGNC Symbol;Acc:HGNC:14042]	-1.35621594676756	3.17561146694921e-33	7.43333887927117e-32
ENSG00000163170	BOLA3	388962	bolA family member 3 [Source:HGNC Symbol;Acc:HGNC:24415]	-1.38916601165343	3.61703605572087e-33	8.45658749311498e-32
ENSG00000117748	RPA2	6118	replication protein A2, 32kDa [Source:HGNC Symbol;Acc:HGNC:10290]	-1.34682679425697	4.31187741255731e-33	1.00692021468655e-31
ENSG00000167105	TMEM92	162461	transmembrane protein 92 [Source:HGNC Symbol;Acc:HGNC:26579]	1.43369768559028	4.67586634530374e-33	1.09063064365786e-31
ENSG00000164687	FABP5	2171	fatty acid binding protein 5 (psoriasis-associated) [Source:HGNC Symbol;Acc:HGNC:3560]	-1.44086745105908	4.82278047830223e-33	1.1235713576573e-31
ENSG00000197837	HIST4H4	121504	histone cluster 4, H4 [Source:HGNC Symbol;Acc:HGNC:20510]	-1.38651565883699	4.83309703945322e-33	1.12464858788502e-31
ENSG00000267121		NA		1.54296762620142	5.19795887619045e-33	1.2081279477414e-31
ENSG00000138449	SLC40A1	30061	solute carrier family 40 (iron-regulated transporter), member 1 [Source:HGNC Symbol;Acc:HGNC:10909]	1.21223226935947	5.26717602698453e-33	1.22277708095307e-31
ENSG00000160783	PMF1	11243	polyamine-modulated factor 1 [Source:HGNC Symbol;Acc:HGNC:9112]	-1.44964560053678	5.28947955296049e-33	1.22651359211605e-31
ENSG00000087245	MMP2	4313	matrix metallopeptidase 2 [Source:HGNC Symbol;Acc:HGNC:7166]	2.24716578062896	5.99033832248377e-33	1.38739887337619e-31
ENSG00000168411	RFWD3	55159	ring finger and WD repeat domain 3 [Source:HGNC Symbol;Acc:HGNC:25539]	-1.04229247396259	6.06156589615573e-33	1.40225170778048e-31
ENSG00000149212	SESN3	143686	sestrin 3 [Source:HGNC Symbol;Acc:HGNC:23060]	1.16733061538011	7.73713061991504e-33	1.78777488335721e-31
ENSG00000105204	DYRK1B	9149	dual-specificity tyrosine-(Y)-phosphorylation regulated kinase 1B [Source:HGNC Symbol;Acc:HGNC:3092]	1.3077314899747	8.72245913366927e-33	2.01309465706507e-31
ENSG00000168398	BDKRB2	624	bradykinin receptor B2 [Source:HGNC Symbol;Acc:HGNC:1030]	1.28062481280864	8.79680456360824e-33	2.0278841418745e-31
ENSG00000211459	MT-RNR1	NA	mitochondrially encoded 12S RNA [Source:HGNC Symbol;Acc:HGNC:7470]	1.68559638117612	8.8807364745637e-33	2.04484650106621e-31
ENSG00000179409	GEMIN4	50628	gem (nuclear organelle) associated protein 4 [Source:HGNC Symbol;Acc:HGNC:15717]	-1.33743554494862	9.39128178110976e-33	2.15988548157863e-31
ENSG00000197119	SLC25A29	123096	solute carrier family 25 (mitochondrial carnitine/acylcarnitine carrier), member 29 [Source:HGNC Symbol;Acc:HGNC:20116]	1.31129788321793	9.67414363293986e-33	2.22235327456232e-31
ENSG00000124789	NUP153	9972	nucleoporin 153kDa [Source:HGNC Symbol;Acc:HGNC:8062]	-1.04871404374028	9.86543271062594e-33	2.26366421174362e-31
ENSG00000145833	DDX46	9879	DEAD (Asp-Glu-Ala-Asp) box polypeptide 46 [Source:HGNC Symbol;Acc:HGNC:18681]	-1.02067415113711	1.00939100317316e-32	2.31340239659965e-31
ENSG00000101198	NKAIN4	128414	Na+/K+ transporting ATPase interacting 4 [Source:HGNC Symbol;Acc:HGNC:16191]	3.26199311841137	1.01742943320333e-32	2.32912350896466e-31
ENSG00000196230	TUBB	203068	tubulin, beta class I [Source:HGNC Symbol;Acc:HGNC:20778]	-1.57843596960896	1.07793052753617e-32	2.46476799791719e-31
ENSG00000171960	PPIH	10465	peptidylprolyl isomerase H (cyclophilin H) [Source:HGNC Symbol;Acc:HGNC:14651]	-1.46932258602853	1.11205513635362e-32	2.53985679465921e-31
ENSG00000075336	TIMM21	29090	translocase of inner mitochondrial membrane 21 homolog (yeast) [Source:HGNC Symbol;Acc:HGNC:25010]	-1.19405394264963	1.12685101506427e-32	2.57067767362699e-31
ENSG00000114405	C3orf14	57415	chromosome 3 open reading frame 14 [Source:HGNC Symbol;Acc:HGNC:25024]	-1.79018893829682	1.14315086173383e-32	2.60485448955173e-31
ENSG00000198131	ZNF544	27300	zinc finger protein 544 [Source:HGNC Symbol;Acc:HGNC:16759]	-1.20410929391238	1.17592287610254e-32	2.67644381800481e-31
ENSG00000176974	SHMT1	6470	serine hydroxymethyltransferase 1 (soluble) [Source:HGNC Symbol;Acc:HGNC:10850]	-1.05824534797353	1.19377222718344e-32	2.71394293673603e-31
ENSG00000240875	LINC00886	730091	long intergenic non-protein coding RNA 886 [Source:HGNC Symbol;Acc:HGNC:48572]	1.98489500663408	1.23965331662598e-32	2.81501045094975e-31
ENSG00000127561	SYNGR3	9143	synaptogyrin 3 [Source:HGNC Symbol;Acc:HGNC:11501]	1.45921325398051	1.35414173088099e-32	3.07146085364924e-31
ENSG00000167107	ACSF2	80221	acyl-CoA synthetase family member 2 [Source:HGNC Symbol;Acc:HGNC:26101]	1.26801549726238	1.39454471208504e-32	3.15947538210459e-31
ENSG00000174307	PHLDA3	23612	pleckstrin homology-like domain, family A, member 3 [Source:HGNC Symbol;Acc:HGNC:8934]	1.09323262275994	1.44195388820234e-32	3.26314330072457e-31
ENSG00000134321	RSAD2	91543	radical S-adenosyl methionine domain containing 2 [Source:HGNC Symbol;Acc:HGNC:30908]	4.10456475011569	1.49084797998997e-32	3.36993051403681e-31
ENSG00000169689	STRA13	201254	stimulated by retinoic acid 13 [Source:HGNC Symbol;Acc:HGNC:11422]	-1.35010129243945	1.76778860366997e-32	3.99136361761187e-31
ENSG00000279458		NA		2.34533893336457	1.84146303704341e-32	4.15296161641891e-31
ENSG00000124802	EEF1E1	9521	eukaryotic translation elongation factor 1 epsilon 1 [Source:HGNC Symbol;Acc:HGNC:3212]	-1.31059948532745	2.05289159671059e-32	4.62450699938591e-31
ENSG00000167535	CACNB3	784	calcium channel, voltage-dependent, beta 3 subunit [Source:HGNC Symbol;Acc:HGNC:1403]	1.243329068151	2.1697607121409e-32	4.88220872768287e-31
ENSG00000153246	PLA2R1	22925	phospholipase A2 receptor 1, 180kDa [Source:HGNC Symbol;Acc:HGNC:9042]	1.31942744698452	2.40422156497252e-32	5.4036178882363e-31
ENSG00000131351	HAUS8	93323	HAUS augmin-like complex, subunit 8 [Source:HGNC Symbol;Acc:HGNC:30532]	-1.92534190898574	2.48988860324383e-32	5.58979991428239e-31
ENSG00000110697	PITPNM1	9600	phosphatidylinositol transfer protein, membrane-associated 1 [Source:HGNC Symbol;Acc:HGNC:9003]	1.05563628295964	2.52676710889017e-32	5.66615334883475e-31
ENSG00000173085	COQ2	27235	coenzyme Q2 4-hydroxybenzoate polyprenyltransferase [Source:HGNC Symbol;Acc:HGNC:25223]	-1.31685550868379	2.62926792671532e-32	5.88932167349069e-31
ENSG00000088899		9762	Leucine zipper putative tumor suppressor 3 [Source:UniProtKB/Swiss-Prot;Acc:O60299]	1.39041840821485	3.05973292919066e-32	6.84576259899102e-31
ENSG00000026036	RTEL1-TNFRSF6B	NA	RTEL1-TNFRSF6B readthrough (NMD candidate) [Source:HGNC Symbol;Acc:HGNC:44095]	-1.20446724270399	3.09714644165979e-32	6.92163179880438e-31
ENSG00000256043	CTSO	1519	cathepsin O [Source:HGNC Symbol;Acc:HGNC:2542]	2.15305850601402	3.88629817080657e-32	8.67544708050334e-31
ENSG00000075188	NUP37	79023	nucleoporin 37kDa [Source:HGNC Symbol;Acc:HGNC:29929]	-1.13858344093453	3.9676423148047e-32	8.84703629472706e-31
ENSG00000112081	SRSF3	6428	serine/arginine-rich splicing factor 3 [Source:HGNC Symbol;Acc:HGNC:10785]	-1.17707299528968	4.07074458488366e-32	9.06670011487729e-31
ENSG00000143575	HAX1	10456	HCLS1 associated protein X-1 [Source:HGNC Symbol;Acc:HGNC:16915]	-1.03582866130317	4.09969117554694e-32	9.12088951172359e-31
ENSG00000127663	KDM4B	23030	lysine (K)-specific demethylase 4B [Source:HGNC Symbol;Acc:HGNC:29136]	1.17553903008313	4.15482472499381e-32	9.23315154859142e-31
ENSG00000115761	NOL10	79954	nucleolar protein 10 [Source:HGNC Symbol;Acc:HGNC:25862]	-1.02630504441316	5.31113960622433e-32	1.17895364112998e-30
ENSG00000107551	RASSF4	83937	Ras association (RalGDS/AF-6) domain family member 4 [Source:HGNC Symbol;Acc:HGNC:20793]	1.79999624247718	5.32314178448698e-32	1.18029168456032e-30
ENSG00000132510	KDM6B	23135	lysine (K)-specific demethylase 6B [Source:HGNC Symbol;Acc:HGNC:29012]	1.5911796773159	5.48070565331001e-32	1.21386570500888e-30
ENSG00000163002	NUP35	129401	nucleoporin 35kDa [Source:HGNC Symbol;Acc:HGNC:29797]	-1.13206085251358	5.65856123960927e-32	1.25185370492408e-30
ENSG00000166444	ST5	6764	suppression of tumorigenicity 5 [Source:HGNC Symbol;Acc:HGNC:11350]	1.33801739332859	5.85695574967617e-32	1.29429550101345e-30
ENSG00000169047	IRS1	3667	insulin receptor substrate 1 [Source:HGNC Symbol;Acc:HGNC:6125]	1.07087352192034	6.11422682314332e-32	1.34963871640245e-30
ENSG00000123131	PRDX4	10549	peroxiredoxin 4 [Source:HGNC Symbol;Acc:HGNC:17169]	-0.96707605856944	6.35376595542814e-32	1.40094866311873e-30
ENSG00000140450	ARRDC4	91947	arrestin domain containing 4 [Source:HGNC Symbol;Acc:HGNC:28087]	2.26995313277545	7.18674719088707e-32	1.58284701787252e-30
ENSG00000111845	PAK1IP1	55003	PAK1 interacting protein 1 [Source:HGNC Symbol;Acc:HGNC:20882]	-1.23080166096888	7.74415387580999e-32	1.7037138526782e-30
ENSG00000176619	LMNB2	84823	lamin B2 [Source:HGNC Symbol;Acc:HGNC:6638]	-1.42240447670081	8.91321743426859e-32	1.95826157612045e-30
ENSG00000138074	SLC5A6	8884	solute carrier family 5 (sodium/multivitamin and iodide cotransporter), member 6 [Source:HGNC Symbol;Acc:HGNC:11041]	-1.1972971926631	8.92101345671393e-32	1.95826157612045e-30
ENSG00000257167	TMPO-AS1	100128191	TMPO antisense RNA 1 [Source:HGNC Symbol;Acc:HGNC:44158]	-2.34878043806722	9.47399007830394e-32	2.07733793548249e-30
ENSG00000247077	PGAM5	192111	phosphoglycerate mutase family member 5 [Source:HGNC Symbol;Acc:HGNC:28763]	-1.16635420792269	9.7969823739154e-32	2.14577809067708e-30
ENSG00000187840	EIF4EBP1	1978	eukaryotic translation initiation factor 4E binding protein 1 [Source:HGNC Symbol;Acc:HGNC:3288]	-1.19105108379351	9.85048326221114e-32	2.15510683641466e-30
ENSG00000111196	MAGOHB	55110	mago-nashi homolog B (Drosophila) [Source:HGNC Symbol;Acc:HGNC:25504]	-1.15507443277857	1.21469839446002e-31	2.65459972134426e-30
ENSG00000196878	LAMB3	3914	laminin, beta 3 [Source:HGNC Symbol;Acc:HGNC:6490]	1.59091574610966	1.29276623068679e-31	2.82208725452467e-30
ENSG00000134684	YARS	8565	tyrosyl-tRNA synthetase [Source:HGNC Symbol;Acc:HGNC:12840]	-1.05861794601167	1.47704843933708e-31	3.22081335182598e-30
ENSG00000054392	HHAT	55733	hedgehog acyltransferase [Source:HGNC Symbol;Acc:HGNC:18270]	1.38871699293654	1.64623455904061e-31	3.58577838460929e-30
ENSG00000196689	TRPV1	7442	transient receptor potential cation channel, subfamily V, member 1 [Source:HGNC Symbol;Acc:HGNC:12716]	1.47220857038582	1.71788746639528e-31	3.73772960199396e-30
ENSG00000159055	MIS18A	54069	MIS18 kinetochore protein A [Source:HGNC Symbol;Acc:HGNC:1286]	-1.59019199850706	1.99306394030632e-31	4.33168000051613e-30
ENSG00000132563	REEP2	51308	receptor accessory protein 2 [Source:HGNC Symbol;Acc:HGNC:17975]	1.5518534345342	2.06661092392792e-31	4.48658960583737e-30
ENSG00000136861	CDK5RAP2	55755	CDK5 regulatory subunit associated protein 2 [Source:HGNC Symbol;Acc:HGNC:18672]	-0.943000971876859	2.07764831681414e-31	4.50560045521187e-30
ENSG00000155093	PTPRN2	5799	protein tyrosine phosphatase, receptor type, N polypeptide 2 [Source:HGNC Symbol;Acc:HGNC:9677]	2.34750372069869	2.21249154069526e-31	4.79276128047977e-30
ENSG00000108312	UBTF	7343	upstream binding transcription factor, RNA polymerase I [Source:HGNC Symbol;Acc:HGNC:12511]	-1.01546136798263	3.27772167811114e-31	7.09251582396098e-30
ENSG00000158825	CDA	978	cytidine deaminase [Source:HGNC Symbol;Acc:HGNC:1712]	1.5881619345193	3.44269007818727e-31	7.44133317118903e-30
ENSG00000144580	RQCD1	9125	RCD1 required for cell differentiation1 homolog (S. pombe) [Source:HGNC Symbol;Acc:HGNC:10445]	-1.00928091083151	3.45048742449918e-31	7.4500360173121e-30
ENSG00000242114	MTFP1	51537	mitochondrial fission process 1 [Source:HGNC Symbol;Acc:HGNC:26945]	-1.35393796428434	3.46888882651122e-31	7.48159035551918e-30
ENSG00000163430	FSTL1	11167	follistatin-like 1 [Source:HGNC Symbol;Acc:HGNC:3972]	1.22834311265294	4.49312970264393e-31	9.68007310855327e-30
ENSG00000158828	PINK1	65018	PTEN induced putative kinase 1 [Source:HGNC Symbol;Acc:HGNC:14581]	1.00426919821308	4.78846405008868e-31	1.03051084720645e-29
ENSG00000134516	DOCK2	1794	dedicator of cytokinesis 2 [Source:HGNC Symbol;Acc:HGNC:2988]	3.04451573703141	5.10093195215919e-31	1.09656160660345e-29
ENSG00000269891	ARHGAP19-SLIT1	NA	ARHGAP19-SLIT1 readthrough (NMD candidate) [Source:HGNC Symbol;Acc:HGNC:48348]	-2.01764575917142	5.36744796742922e-31	1.15260110917969e-29
ENSG00000133321	RARRES3	5920	retinoic acid receptor responder (tazarotene induced) 3 [Source:HGNC Symbol;Acc:HGNC:9869]	2.71845236708804	5.50758897513973e-31	1.18141072522107e-29
ENSG00000136108	CKAP2	26586	cytoskeleton associated protein 2 [Source:HGNC Symbol;Acc:HGNC:1990]	-1.11455887758172	5.55360717903349e-31	1.18998984196297e-29
ENSG00000197558	SSPO	23145	SCO-spondin [Source:HGNC Symbol;Acc:HGNC:21998]	2.41015813980742	5.75924944310405e-31	1.23271648968541e-29
ENSG00000149596	JPH2	57158	junctophilin 2 [Source:HGNC Symbol;Acc:HGNC:14202]	2.17920521928665	5.86929769081705e-31	1.25491174436993e-29
ENSG00000125347	IRF1	3659	interferon regulatory factor 1 [Source:HGNC Symbol;Acc:HGNC:6116]	1.14157886779736	6.8626226761481e-31	1.46569638614372e-29
ENSG00000111231	GPN3	51184	GPN-loop GTPase 3 [Source:HGNC Symbol;Acc:HGNC:30186]	-1.20220058392315	6.86998812294535e-31	1.46569638614372e-29
ENSG00000115902	SLC1A4	6509	solute carrier family 1 (glutamate/neutral amino acid transporter), member 4 [Source:HGNC Symbol;Acc:HGNC:10942]	-1.40374473131286	7.18653754871981e-31	1.53157751685554e-29
ENSG00000070540	WIPI1	55062	WD repeat domain, phosphoinositide interacting 1 [Source:HGNC Symbol;Acc:HGNC:25471]	1.56862102796024	7.83904084978227e-31	1.66883718780494e-29
ENSG00000100647	SUSD6	9766	sushi domain containing 6 [Source:HGNC Symbol;Acc:HGNC:19956]	1.29730082092228	9.09921374618885e-31	1.93502762938328e-29
ENSG00000145912	NHP2	55651	NHP2 ribonucleoprotein [Source:HGNC Symbol;Acc:HGNC:14377]	-1.10341594747226	9.730908927934e-31	2.06713802989531e-29
ENSG00000117155	SSX2IP	117178	synovial sarcoma, X breakpoint 2 interacting protein [Source:HGNC Symbol;Acc:HGNC:16509]	-1.10328111788247	1.04688555285762e-30	2.22151138370086e-29
ENSG00000134809	TIMM10	26519	translocase of inner mitochondrial membrane 10 homolog (yeast) [Source:HGNC Symbol;Acc:HGNC:11814]	-1.33425807597566	1.09699460203242e-30	2.32534606842838e-29
ENSG00000134762	DSC3	1825	desmocollin 3 [Source:HGNC Symbol;Acc:HGNC:3037]	1.42692920289732	1.43397743825587e-30	3.03640495929079e-29
ENSG00000099783	HNRNPM	4670	heterogeneous nuclear ribonucleoprotein M [Source:HGNC Symbol;Acc:HGNC:5046]	-1.05906091956499	1.53470992860051e-30	3.24622369908263e-29
ENSG00000168883	USP39	10713	ubiquitin specific peptidase 39 [Source:HGNC Symbol;Acc:HGNC:20071]	-0.9657336060504	1.61688357863321e-30	3.41637989085322e-29
ENSG00000042832	TG	7038	thyroglobulin [Source:HGNC Symbol;Acc:HGNC:11764]	3.04407994980521	1.6220249149506e-30	3.42358164741069e-29
ENSG00000164163	ABCE1	6059	ATP-binding cassette, sub-family E (OABP), member 1 [Source:HGNC Symbol;Acc:HGNC:69]	-1.10348009961261	1.66875231479574e-30	3.51844938432281e-29
ENSG00000118412	CASP8AP2	9994	caspase 8 associated protein 2 [Source:HGNC Symbol;Acc:HGNC:1510]	-1.01647687538849	1.6765122887367e-30	3.53104230024332e-29
ENSG00000011304	PTBP1	5725	polypyrimidine tract binding protein 1 [Source:HGNC Symbol;Acc:HGNC:9583]	-1.02657108663982	1.69371600841703e-30	3.56347747202203e-29
ENSG00000179091	CYC1	1537	cytochrome c-1 [Source:HGNC Symbol;Acc:HGNC:2579]	-1.03014042627817	1.72036396010302e-30	3.61569259529737e-29
ENSG00000104368	PLAT	5327	plasminogen activator, tissue [Source:HGNC Symbol;Acc:HGNC:9051]	1.99013592941179	1.74033120079004e-30	3.65377079732285e-29
ENSG00000188177	ZC3H6	376940	zinc finger CCCH-type containing 6 [Source:HGNC Symbol;Acc:HGNC:24762]	1.78786128348347	1.83335108618179e-30	3.84497707628528e-29
ENSG00000144395	CCDC150	284992	coiled-coil domain containing 150 [Source:HGNC Symbol;Acc:HGNC:26834]	-1.5875553058196	1.85271784836153e-30	3.88147336290884e-29
ENSG00000175768	TOMM5	401505	translocase of outer mitochondrial membrane 5 homolog (yeast) [Source:HGNC Symbol;Acc:HGNC:31369]	-1.10648776955866	1.96649214457066e-30	4.11546809408241e-29
ENSG00000133805	AMPD3	272	adenosine monophosphate deaminase 3 [Source:HGNC Symbol;Acc:HGNC:470]	1.574746300532	1.96873247868676e-30	4.11579670359108e-29
ENSG00000230487	PSMG3-AS1	114796	PSMG3 antisense RNA 1 (head to head) [Source:HGNC Symbol;Acc:HGNC:22230]	1.70663561265716	2.05212614747522e-30	4.28560297775058e-29
ENSG00000006459	KDM7A	80853	lysine (K)-specific demethylase 7A [Source:HGNC Symbol;Acc:HGNC:22224]	1.50203783501218	2.1592994136806e-30	4.50465884019788e-29
ENSG00000169230	PRELID1	27166	PRELI domain containing 1 [Source:HGNC Symbol;Acc:HGNC:30255]	-1.19207513427042	2.1890826206556e-30	4.56197428836203e-29
ENSG00000197905	TEAD4	7004	TEA domain family member 4 [Source:HGNC Symbol;Acc:HGNC:11717]	-1.36155223480505	2.36562712216121e-30	4.92469224714614e-29
ENSG00000006756	ARSD	414	arylsulfatase D [Source:HGNC Symbol;Acc:HGNC:717]	1.09179702196463	2.44933569839789e-30	5.09358695342618e-29
ENSG00000154767	XPC	7508	xeroderma pigmentosum, complementation group C [Source:HGNC Symbol;Acc:HGNC:12816]	0.917255188799918	2.52011656922937e-30	5.23527055117722e-29
ENSG00000255717	SNHG1	NA	small nucleolar RNA host gene 1 [Source:HGNC Symbol;Acc:HGNC:32688]	-1.06546723422944	2.5311188869041e-30	5.25260343799132e-29
ENSG00000114268	PFKFB4	5210	6-phosphofructo-2-kinase/fructose-2,6-biphosphatase 4 [Source:HGNC Symbol;Acc:HGNC:8875]	1.78239830953615	2.55053117689801e-30	5.28733409557157e-29
ENSG00000204642	HLA-F	3134	major histocompatibility complex, class I, F [Source:HGNC Symbol;Acc:HGNC:4963]	2.01003116677803	2.64311967130198e-30	5.47352958346352e-29
ENSG00000091592	NLRP1	22861	NLR family, pyrin domain containing 1 [Source:HGNC Symbol;Acc:HGNC:14374]	2.91192475392551	2.842326477271e-30	5.87989548533675e-29
ENSG00000177917	ARL6IP6	151188	ADP-ribosylation factor-like 6 interacting protein 6 [Source:HGNC Symbol;Acc:HGNC:24048]	-1.2755545464623	3.23085522442211e-30	6.67665018971581e-29
ENSG00000170515	PA2G4	5036	proliferation-associated 2G4, 38kDa [Source:HGNC Symbol;Acc:HGNC:8550]	-1.09020140494514	3.62382176010128e-30	7.48090101280678e-29
ENSG00000168268	NT5DC2	64943	5'-nucleotidase domain containing 2 [Source:HGNC Symbol;Acc:HGNC:25717]	-1.22611222669139	4.14005238230131e-30	8.53766961009861e-29
ENSG00000175662	TOM1L2	146691	target of myb1-like 2 (chicken) [Source:HGNC Symbol;Acc:HGNC:11984]	1.04087811697878	4.22473110506114e-30	8.70321039745441e-29
ENSG00000185561	TLCD2	727910	TLC domain containing 2 [Source:HGNC Symbol;Acc:HGNC:33522]	1.25699637963975	4.90889677281608e-30	1.01021004837244e-28
ENSG00000105499	PLA2G4C	8605	phospholipase A2, group IVC (cytosolic, calcium-independent) [Source:HGNC Symbol;Acc:HGNC:9037]	2.3799803009444	4.98387409621869e-30	1.0245724937034e-28
ENSG00000142230	SAE1	10055	SUMO1 activating enzyme subunit 1 [Source:HGNC Symbol;Acc:HGNC:30660]	-1.08761945181742	5.14198493428689e-30	1.05597769606831e-28
ENSG00000143621	ILF2	3608	interleukin enhancer binding factor 2 [Source:HGNC Symbol;Acc:HGNC:6037]	-1.07980469715412	5.21621959811922e-30	1.07011042970346e-28
ENSG00000092140	G2E3	55632	G2/M-phase specific E3 ubiquitin protein ligase [Source:HGNC Symbol;Acc:HGNC:20338]	-1.01950091515897	5.29391106840339e-30	1.08492227248317e-28
ENSG00000168350	DEGS2	123099	delta(4)-desaturase, sphingolipid 2 [Source:HGNC Symbol;Acc:HGNC:20113]	2.88783888890955	5.51841604451149e-30	1.12975986917481e-28
ENSG00000160179	ABCG1	9619	ATP-binding cassette, sub-family G (WHITE), member 1 [Source:HGNC Symbol;Acc:HGNC:73]	1.59888744244935	5.73059918868732e-30	1.17198465395142e-28
ENSG00000031081	ARHGAP31	57514	Rho GTPase activating protein 31 [Source:HGNC Symbol;Acc:HGNC:29216]	1.92298454019107	5.91113576947918e-30	1.20765665213889e-28
ENSG00000160352	ZNF714	148206	zinc finger protein 714 [Source:HGNC Symbol;Acc:HGNC:27124]	-1.4718177559528	6.20935905368182e-30	1.26727373413779e-28
ENSG00000189308	LIN54	132660	lin-54 DREAM MuvB core complex component [Source:HGNC Symbol;Acc:HGNC:25397]	-1.178739522269	7.22409676028231e-30	1.47285093494466e-28
ENSG00000168961	LGALS9	3965	lectin, galactoside-binding, soluble, 9 [Source:HGNC Symbol;Acc:HGNC:6570]	2.98045072070051	7.48983343135875e-30	1.52545514711261e-28
ENSG00000031691	CENPQ	55166	centromere protein Q [Source:HGNC Symbol;Acc:HGNC:21347]	-1.66445398686511	7.50471626521794e-30	1.52691219913126e-28
ENSG00000116661	FBXO2	26232	F-box protein 2 [Source:HGNC Symbol;Acc:HGNC:13581]	1.40857153061974	7.58455455781065e-30	1.54156851691468e-28
ENSG00000184384	MAML2	84441	mastermind-like 2 (Drosophila) [Source:HGNC Symbol;Acc:HGNC:16259]	1.50950322241526	7.79141453296188e-30	1.58198546262276e-28
ENSG00000119801	YPEL5	51646	yippee-like 5 (Drosophila) [Source:HGNC Symbol;Acc:HGNC:18329]	0.953086815717302	7.94922841688683e-30	1.61237121770037e-28
ENSG00000144837	PLA1A	51365	phospholipase A1 member A [Source:HGNC Symbol;Acc:HGNC:17661]	2.65501365638265	8.17771144060683e-30	1.65701402277568e-28
ENSG00000204519	ZNF551	90233	zinc finger protein 551 [Source:HGNC Symbol;Acc:HGNC:25108]	-1.22036834344296	8.73824705431969e-30	1.76877877874119e-28
ENSG00000165102	HGSNAT	138050	heparan-alpha-glucosaminide N-acetyltransferase [Source:HGNC Symbol;Acc:HGNC:26527]	0.960534819216432	9.08357695408769e-30	1.83679781274265e-28
ENSG00000113456	RAD1	5810	RAD1 checkpoint DNA exonuclease [Source:HGNC Symbol;Acc:HGNC:9806]	-1.12009670509022	1.05725259628226e-29	2.13569348590514e-28
ENSG00000124098	FAM210B	116151	family with sequence similarity 210, member B [Source:HGNC Symbol;Acc:HGNC:16102]	1.07546149997521	1.09687707880288e-29	2.21347329610109e-28
ENSG00000101210	EEF1A2	1917	eukaryotic translation elongation factor 1 alpha 2 [Source:HGNC Symbol;Acc:HGNC:3192]	1.2209988244144	1.11159823111652e-29	2.24089129121817e-28
ENSG00000222009	BTBD19	149478	BTB (POZ) domain containing 19 [Source:HGNC Symbol;Acc:HGNC:27145]	2.32280657237857	1.22988986245704e-29	2.47683018580033e-28
ENSG00000204392	LSM2	57819	LSM2 homolog, U6 small nuclear RNA associated (S. cerevisiae) [Source:HGNC Symbol;Acc:HGNC:13940]	-1.5056960060556	1.24992476737478e-29	2.51461443016866e-28
ENSG00000145220	LYAR	55646	Ly1 antibody reactive [Source:HGNC Symbol;Acc:HGNC:26021]	-1.42146693743183	1.45324321738373e-29	2.9206788405527e-28
ENSG00000118257	NRP2	8828	neuropilin 2 [Source:HGNC Symbol;Acc:HGNC:8005]	1.22443492119415	1.59095216469781e-29	3.19419217131808e-28
ENSG00000176890	TYMS	7298	thymidylate synthetase [Source:HGNC Symbol;Acc:HGNC:12441]	-1.30358041716194	1.6349747102038e-29	3.27924470810013e-28
ENSG00000135763	URB2	9816	URB2 ribosome biogenesis 2 homolog (S. cerevisiae) [Source:HGNC Symbol;Acc:HGNC:28967]	-1.00122915119801	1.66248674826405e-29	3.33104342786051e-28
ENSG00000102316	MAGED2	10916	melanoma antigen family D2 [Source:HGNC Symbol;Acc:HGNC:16353]	0.981954968832726	1.73039183364631e-29	3.46358876043733e-28
ENSG00000139998	RAB15	376267	RAB15, member RAS oncogene family [Source:HGNC Symbol;Acc:HGNC:20150]	1.03463024868019	1.98199426800558e-29	3.96318610918201e-28
ENSG00000155189	AGPAT5	55326	1-acylglycerol-3-phosphate O-acyltransferase 5 [Source:HGNC Symbol;Acc:HGNC:20886]	-0.98263862949745	2.10273915298254e-29	4.20037560225714e-28
ENSG00000277791	PSMB3	5691	proteasome (prosome, macropain) subunit, beta type, 3 [Source:HGNC Symbol;Acc:HGNC:9540]	-1.05589801960218	2.17396259931625e-29	4.33826314263554e-28
ENSG00000172602	RND1	27289	Rho family GTPase 1 [Source:HGNC Symbol;Acc:HGNC:18314]	1.48972782632948	2.2683423382775e-29	4.52203544248337e-28
ENSG00000250091	DNAH10OS	NA	dynein, axonemal, heavy chain 10 opposite strand [Source:HGNC Symbol;Acc:HGNC:37121]	1.68472362818697	2.33750344627033e-29	4.65521351658434e-28
ENSG00000198203	SULT1C2	6819	sulfotransferase family, cytosolic, 1C, member 2 [Source:HGNC Symbol;Acc:HGNC:11456]	3.25195172151683	2.55213358257409e-29	5.07753787082917e-28
ENSG00000258366	RTEL1	51750	regulator of telomere elongation helicase 1 [Source:HGNC Symbol;Acc:HGNC:15888]	-1.18424616402857	2.90758576519914e-29	5.77889983674791e-28
ENSG00000102900	NUP93	9688	nucleoporin 93kDa [Source:HGNC Symbol;Acc:HGNC:28958]	-1.10623245556024	2.9166504082103e-29	5.79108999644248e-28
ENSG00000196975	ANXA4	307	annexin A4 [Source:HGNC Symbol;Acc:HGNC:542]	1.21682106104039	2.94243393887178e-29	5.83641816228423e-28
ENSG00000172037	LAMB2	3913	laminin, beta 2 (laminin S) [Source:HGNC Symbol;Acc:HGNC:6487]	1.2752094282404	3.0878261123538e-29	6.11866526335623e-28
ENSG00000128510	CPA4	51200	carboxypeptidase A4 [Source:HGNC Symbol;Acc:HGNC:15740]	2.63514903505961	3.53541055036825e-29	6.9985541916909e-28
ENSG00000175155	YPEL2	388403	yippee-like 2 (Drosophila) [Source:HGNC Symbol;Acc:HGNC:18326]	1.41485504880701	3.65777618574827e-29	7.23353616873301e-28
ENSG00000142173	COL6A2	1292	collagen, type VI, alpha 2 [Source:HGNC Symbol;Acc:HGNC:2212]	1.8606961232074	4.18602643249628e-29	8.26991382003965e-28
ENSG00000219626	FAM228B	375190	family with sequence similarity 228, member B [Source:HGNC Symbol;Acc:HGNC:24736]	1.80592589283883	4.38406306258173e-29	8.65250248395251e-28
ENSG00000174799	CEP135	9662	centrosomal protein 135kDa [Source:HGNC Symbol;Acc:HGNC:29086]	-1.18084224617186	4.43030259836858e-29	8.73503574185326e-28
ENSG00000131378	RFTN1	23180	raftlin, lipid raft linker 1 [Source:HGNC Symbol;Acc:HGNC:30278]	2.00546767568624	4.58035272257283e-29	9.02187920111155e-28
ENSG00000042317	SPATA7	55812	spermatogenesis associated 7 [Source:HGNC Symbol;Acc:HGNC:20423]	1.29967419556726	5.25691136085953e-29	1.0344177375014e-27
ENSG00000104361	NIPAL2	79815	NIPA-like domain containing 2 [Source:HGNC Symbol;Acc:HGNC:25854]	1.43519414209273	6.02917272586825e-29	1.18519737683834e-27
ENSG00000196557	CACNA1H	8912	calcium channel, voltage-dependent, T type, alpha 1H subunit [Source:HGNC Symbol;Acc:HGNC:1395]	0.953928648510592	6.34224359182145e-29	1.24550064015929e-27
ENSG00000151287	TEX30	93081	testis expressed 30 [Source:HGNC Symbol;Acc:HGNC:25188]	-1.79127236720037	6.35684062577e-29	1.24712754123845e-27
ENSG00000115946	PNO1	56902	partner of NOB1 homolog (S. cerevisiae) [Source:HGNC Symbol;Acc:HGNC:32790]	-1.00421159189506	6.61308286682249e-29	1.29611175711255e-27
ENSG00000100632	ERH	2079	enhancer of rudimentary homolog (Drosophila) [Source:HGNC Symbol;Acc:HGNC:3447]	-1.07092608013706	6.73647618060563e-29	1.31898734810748e-27
ENSG00000128872	TMOD2	29767	tropomodulin 2 (neuronal) [Source:HGNC Symbol;Acc:HGNC:11872]	1.34746461091362	6.86109454581235e-29	1.34205726581256e-27
ENSG00000105290	APLP1	333	amyloid beta (A4) precursor-like protein 1 [Source:HGNC Symbol;Acc:HGNC:597]	0.980248786166006	7.10298479217003e-29	1.38799770083196e-27
ENSG00000157150	TIMP4	7079	TIMP metallopeptidase inhibitor 4 [Source:HGNC Symbol;Acc:HGNC:11823]	1.40867057049514	7.2380754559811e-29	1.41299820858066e-27
ENSG00000178295	GEN1	348654	GEN1 Holliday junction 5' flap endonuclease [Source:HGNC Symbol;Acc:HGNC:26881]	-1.03878979475599	7.45180912517159e-29	1.45328668387848e-27
ENSG00000240891	PLCXD2	257068	phosphatidylinositol-specific phospholipase C, X domain containing 2 [Source:HGNC Symbol;Acc:HGNC:26462]	1.65498799970271	7.54065443822459e-29	1.46916340317125e-27
ENSG00000165828	PRAP1	118471	proline-rich acidic protein 1 [Source:HGNC Symbol;Acc:HGNC:23304]	-1.43613813717557	7.72421224472479e-29	1.50344371533776e-27
ENSG00000183207	RUVBL2	10856	RuvB-like AAA ATPase 2 [Source:HGNC Symbol;Acc:HGNC:10475]	-1.01664391757863	7.74609025863446e-29	1.50621810186597e-27
ENSG00000119397	CNTRL	11064	centriolin [Source:HGNC Symbol;Acc:HGNC:1858]	-1.04076029434747	7.92944244100254e-29	1.54035462010272e-27
ENSG00000152133	GPATCH11	253635	G patch domain containing 11 [Source:HGNC Symbol;Acc:HGNC:26768]	-1.32978324814492	8.05783526703908e-29	1.56375828620456e-27
ENSG00000233966	UBE2SP1	NA	ubiquitin-conjugating enzyme E2S pseudogene 1 [Source:HGNC Symbol;Acc:HGNC:30864]	-3.13704366969488	8.7081366713897e-29	1.68830174759544e-27
ENSG00000109472	CPE	1363	carboxypeptidase E [Source:HGNC Symbol;Acc:HGNC:2303]	1.64947498433605	9.15795589606366e-29	1.77377035963366e-27
ENSG00000120334	CENPL	91687	centromere protein L [Source:HGNC Symbol;Acc:HGNC:17879]	-1.42841892480356	9.29769876830009e-29	1.79907283904541e-27
ENSG00000154153	FAM134B	54463	family with sequence similarity 134, member B [Source:HGNC Symbol;Acc:HGNC:25964]	1.54098717403661	9.56121825299524e-29	1.84825271826002e-27
ENSG00000133265	HSPBP1	23640	HSPA (heat shock 70kDa) binding protein, cytoplasmic cochaperone 1 [Source:HGNC Symbol;Acc:HGNC:24989]	-1.12518824316945	9.75687550392735e-29	1.88423101129608e-27
ENSG00000124225	PMEPA1	56937	prostate transmembrane protein, androgen induced 1 [Source:HGNC Symbol;Acc:HGNC:14107]	1.34413959222084	1.01122399875282e-28	1.95095130071881e-27
ENSG00000249353	NPM1P27	NA	nucleophosmin 1 (nucleolar phosphoprotein B23, numatrin) pseudogene 27 [Source:HGNC Symbol;Acc:HGNC:45206]	-1.3247299823531	1.0775367695714e-28	2.07686013850269e-27
ENSG00000169891	REPS2	9185	RALBP1 associated Eps domain containing 2 [Source:HGNC Symbol;Acc:HGNC:9963]	1.88321489670065	1.15614667179252e-28	2.22620210993499e-27
ENSG00000269028	MTRNR2L12	100462981	MT-RNR2-like 12 [Source:HGNC Symbol;Acc:HGNC:37169]	1.71897317946233	1.22935752832371e-28	2.36486731543945e-27
ENSG00000136938	ANP32B	10541	acidic (leucine-rich) nuclear phosphoprotein 32 family, member B [Source:HGNC Symbol;Acc:HGNC:16677]	-1.19304558064845	1.23270245777835e-28	2.36899511243863e-27
ENSG00000270276	HIST2H4B	554313	histone cluster 2, H4b [Source:HGNC Symbol;Acc:HGNC:29607]	-2.41909337055863	1.28588833567395e-28	2.46880563261171e-27
ENSG00000173894	CBX2	84733	chromobox homolog 2 [Source:HGNC Symbol;Acc:HGNC:1552]	-1.27100194875641	1.32786317288777e-28	2.54691891685153e-27
ENSG00000069812	HES2	54626	hes family bHLH transcription factor 2 [Source:HGNC Symbol;Acc:HGNC:16005]	2.44789750159855	1.35258315166739e-28	2.59181694901464e-27
ENSG00000141384	TAF4B	6875	TAF4b RNA polymerase II, TATA box binding protein (TBP)-associated factor, 105kDa [Source:HGNC Symbol;Acc:HGNC:11538]	-1.35171952347621	1.36469847709252e-28	2.61249836370541e-27
ENSG00000099260	PALMD	54873	palmdelphin [Source:HGNC Symbol;Acc:HGNC:15846]	2.52923795669583	1.4255904322177e-28	2.72642445100609e-27
ENSG00000128951	DUT	1854	deoxyuridine triphosphatase [Source:HGNC Symbol;Acc:HGNC:3078]	-1.06831912174115	1.61202679771237e-28	3.08000013690576e-27
ENSG00000165891	E2F7	144455	E2F transcription factor 7 [Source:HGNC Symbol;Acc:HGNC:23820]	-1.4249944322651	1.7153110747139e-28	3.2741725209708e-27
ENSG00000155959	VBP1	7411	von Hippel-Lindau binding protein 1 [Source:HGNC Symbol;Acc:HGNC:12662]	-1.11246113684043	1.73063165976779e-28	3.30022770949541e-27
ENSG00000167553	TUBA1C	84790	tubulin, alpha 1c [Source:HGNC Symbol;Acc:HGNC:20768]	-1.56154464059228	1.75261879603396e-28	3.33893316629188e-27
ENSG00000175305	CCNE2	9134	cyclin E2 [Source:HGNC Symbol;Acc:HGNC:1590]	-1.70079806911838	1.7715885944415e-28	3.37182122078865e-27
ENSG00000065057	NTHL1	4913	nth endonuclease III-like 1 (E. coli) [Source:HGNC Symbol;Acc:HGNC:8028]	-1.19717714620171	2.27269431965769e-28	4.32140028673314e-27
ENSG00000140545	MFGE8	4240	milk fat globule-EGF factor 8 protein [Source:HGNC Symbol;Acc:HGNC:7036]	1.52023150413504	2.27648824296652e-28	4.32445208923524e-27
ENSG00000132507	EIF5A	1984	eukaryotic translation initiation factor 5A [Source:HGNC Symbol;Acc:HGNC:3300]	-1.26803649359836	2.42915754086837e-28	4.61003231291023e-27
ENSG00000100522	GNPNAT1	64841	glucosamine-phosphate N-acetyltransferase 1 [Source:HGNC Symbol;Acc:HGNC:19980]	-0.981362845374167	2.49457378924383e-28	4.72963529561431e-27
ENSG00000111788		NA		-1.38950932222419	2.53938424463903e-28	4.80997844075635e-27
ENSG00000064687	ABCA7	10347	ATP-binding cassette, sub-family A (ABC1), member 7 [Source:HGNC Symbol;Acc:HGNC:37]	1.22532796912211	2.75854001402043e-28	5.22008778898348e-27
ENSG00000183486	MX2	4600	MX dynamin-like GTPase 2 [Source:HGNC Symbol;Acc:HGNC:7533]	4.20289974700063	3.17703963290156e-28	6.00627703230652e-27
ENSG00000101224	CDC25B	994	cell division cycle 25B [Source:HGNC Symbol;Acc:HGNC:1726]	-0.977909048571202	3.29630941119256e-28	6.22580198159848e-27
ENSG00000203791	METTL10	399818	methyltransferase like 10 [Source:HGNC Symbol;Acc:HGNC:33787]	-1.12874730146283	3.52664593792819e-28	6.6544811031241e-27
ENSG00000280248		NA		1.22456863321749	3.79418476065234e-28	7.15247272246638e-27
ENSG00000005156	LIG3	3980	ligase III, DNA, ATP-dependent [Source:HGNC Symbol;Acc:HGNC:6600]	-0.888739842871663	3.83357992917926e-28	7.2198479581378e-27
ENSG00000116117	PARD3B	117583	par-3 family cell polarity regulator beta [Source:HGNC Symbol;Acc:HGNC:14446]	1.17928237726582	4.0342362427213e-28	7.590511543924e-27
ENSG00000100416	TRMU	55687	tRNA 5-methylaminomethyl-2-thiouridylate methyltransferase [Source:HGNC Symbol;Acc:HGNC:25481]	-1.07384101099011	4.04447176293819e-28	7.60252941471045e-27
ENSG00000211535	MIR711	100313843	microRNA 711 [Source:HGNC Symbol;Acc:HGNC:37316]	1.77940128198969	4.21414842663759e-28	7.91394641793273e-27
ENSG00000165283	STOML2	30968	stomatin (EPB72)-like 2 [Source:HGNC Symbol;Acc:HGNC:14559]	-1.03807630636819	4.4148237142205e-28	8.28293041767712e-27
ENSG00000172336	POP7	10248	processing of precursor 7, ribonuclease P/MRP subunit (S. cerevisiae) [Source:HGNC Symbol;Acc:HGNC:19949]	-1.23883610727603	4.49316503088969e-28	8.42191350571696e-27
ENSG00000132313	MRPL35	51318	mitochondrial ribosomal protein L35 [Source:HGNC Symbol;Acc:HGNC:14489]	-0.935603397996362	4.55795229024435e-28	8.53525170104904e-27
ENSG00000048162	NOP16	51491	NOP16 nucleolar protein [Source:HGNC Symbol;Acc:HGNC:26934]	-1.10690212859872	5.4084692143716e-28	1.01183444885535e-26
ENSG00000146054	TRIM7	81786	tripartite motif containing 7 [Source:HGNC Symbol;Acc:HGNC:16278]	-1.8596210912335	5.6253707610484e-28	1.05141745274619e-26
ENSG00000206503	HLA-A	3105	major histocompatibility complex, class I, A [Source:HGNC Symbol;Acc:HGNC:4931]	0.966298917542546	7.6200977396333e-28	1.42289840211905e-26
ENSG00000144642	RBMS3	27303	RNA binding motif, single stranded interacting protein 3 [Source:HGNC Symbol;Acc:HGNC:13427]	1.72222906907145	7.71083717132136e-28	1.43848252272545e-26
ENSG00000169231	THBS3	7059	thrombospondin 3 [Source:HGNC Symbol;Acc:HGNC:11787]	1.2731644058807	7.76699069398757e-28	1.44759120896621e-26
ENSG00000151136	BTBD11	121551	BTB (POZ) domain containing 11 [Source:HGNC Symbol;Acc:HGNC:23844]	0.936478309350771	8.08143069190821e-28	1.5047761050833e-26
ENSG00000134030	CTIF	9811	CBP80/20-dependent translation initiation factor [Source:HGNC Symbol;Acc:HGNC:23925]	1.20757170949907	8.79762774028579e-28	1.63659071221362e-26
ENSG00000132561	MATN2	4147	matrilin 2 [Source:HGNC Symbol;Acc:HGNC:6908]	1.3369450953922	1.06506082034443e-27	1.97943006272104e-26
ENSG00000204922	UQCC3	790955	ubiquinol-cytochrome c reductase complex assembly factor 3 [Source:HGNC Symbol;Acc:HGNC:34399]	-1.24390360426206	1.06892291762277e-27	1.98474071057851e-26
ENSG00000171208	NETO2	81831	neuropilin (NRP) and tolloid (TLL)-like 2 [Source:HGNC Symbol;Acc:HGNC:14644]	-0.936982961553977	1.07563106609099e-27	1.99532087715432e-26
ENSG00000281453	TGFB2-OT1	103611157	TGFB2 overlapping transcript 1 [Source:HGNC Symbol;Acc:HGNC:50629]	1.26976717805264	1.09547950773215e-27	2.03023387943305e-26
ENSG00000117593	DARS2	55157	aspartyl-tRNA synthetase 2, mitochondrial [Source:HGNC Symbol;Acc:HGNC:25538]	-1.01862364174952	1.13669080280061e-27	2.1046357544638e-26
ENSG00000102967	DHODH	1723	dihydroorotate dehydrogenase (quinone) [Source:HGNC Symbol;Acc:HGNC:2867]	-1.24547490596062	1.15981873376366e-27	2.14434841936835e-26
ENSG00000272398	CD24	100133941	CD24 molecule [Source:HGNC Symbol;Acc:HGNC:1645]	1.22301346083816	1.16031001230247e-27	2.14434841936835e-26
ENSG00000119705	SLIRP	81892	SRA stem-loop interacting RNA binding protein [Source:HGNC Symbol;Acc:HGNC:20495]	-1.08518295487257	1.16543366182706e-27	2.15180443206126e-26
ENSG00000157212	PAXIP1	22976	PAX interacting (with transcription-activation domain) protein 1 [Source:HGNC Symbol;Acc:HGNC:8624]	-1.02044067414216	1.18479503470236e-27	2.18550986980204e-26
ENSG00000119335	SET	6418	SET nuclear proto-oncogene [Source:HGNC Symbol;Acc:HGNC:10760]	-1.22943621330715	1.23736909843642e-27	2.28036043924533e-26
ENSG00000072501	SMC1A	8243	structural maintenance of chromosomes 1A [Source:HGNC Symbol;Acc:HGNC:11111]	-1.01284803856642	1.28738866784324e-27	2.37033089672983e-26
ENSG00000210082	MT-RNR2	NA	mitochondrially encoded 16S RNA [Source:HGNC Symbol;Acc:HGNC:7471]	1.7759259889672	1.30586532205918e-27	2.40211129446937e-26
ENSG00000011028	MRC2	9902	mannose receptor, C type 2 [Source:HGNC Symbol;Acc:HGNC:16875]	1.11409293338878	1.33385592049468e-27	2.45131698281794e-26
ENSG00000138780	GSTCD	79807	glutathione S-transferase, C-terminal domain containing [Source:HGNC Symbol;Acc:HGNC:25806]	-1.13478840797677	1.33778736994105e-27	2.45625718220775e-26
ENSG00000110921	MVK	4598	mevalonate kinase [Source:HGNC Symbol;Acc:HGNC:7530]	-1.20211278289903	1.44582040013516e-27	2.65214743036864e-26
ENSG00000145604	SKP2	6502	S-phase kinase-associated protein 2, E3 ubiquitin protein ligase [Source:HGNC Symbol;Acc:HGNC:10901]	-1.09679651791412	1.5060045798976e-27	2.75998390356743e-26
ENSG00000137752	CASP1	834	caspase 1, apoptosis-related cysteine peptidase [Source:HGNC Symbol;Acc:HGNC:1499]	4.99870469788017	1.60752684254543e-27	2.94330864701831e-26
ENSG00000278948		NA		1.73579308050961	1.61927523547529e-27	2.9620742177824e-26
ENSG00000115221	ITGB6	3694,100505984	integrin, beta 6 [Source:HGNC Symbol;Acc:HGNC:6161]	2.41534020187716	1.75653997241935e-27	3.21019460639378e-26
ENSG00000165801	ARHGEF40	55701	Rho guanine nucleotide exchange factor (GEF) 40 [Source:HGNC Symbol;Acc:HGNC:25516]	1.08378082492911	1.75906676419489e-27	3.21184131177766e-26
ENSG00000173113	TRMT112	51504	tRNA methyltransferase 11-2 homolog (S. cerevisiae) [Source:HGNC Symbol;Acc:HGNC:26940]	-1.0247013130174	1.77099554248544e-27	3.22933233337284e-26
ENSG00000088340	FER1L4	NA	fer-1-like family member 4, pseudogene (functional) [Source:HGNC Symbol;Acc:HGNC:15801]	1.77417388511743	1.77191549371136e-27	3.22933233337284e-26
ENSG00000181163	NPM1	4869	nucleophosmin (nucleolar phosphoprotein B23, numatrin) [Source:HGNC Symbol;Acc:HGNC:7910]	-1.33010158778287	1.7818894862277e-27	3.24451692994602e-26
ENSG00000013364	MVP	9961	major vault protein [Source:HGNC Symbol;Acc:HGNC:7531]	0.997206421068655	1.78401811424811e-27	3.24540164503551e-26
ENSG00000135336	ORC3	23595	origin recognition complex, subunit 3 [Source:HGNC Symbol;Acc:HGNC:8489]	-1.01129125221114	1.87946562879767e-27	3.41588987695738e-26
ENSG00000198055	GRK6	2870	G protein-coupled receptor kinase 6 [Source:HGNC Symbol;Acc:HGNC:4545]	-1.17682875781044	1.93604547942593e-27	3.51548846429583e-26
ENSG00000120278	PLEKHG1	57480	pleckstrin homology domain containing, family G (with RhoGef domain) member 1 [Source:HGNC Symbol;Acc:HGNC:20884]	2.60916549455125	1.99672327586088e-27	3.62233838731934e-26
ENSG00000123240	OPTN	10133	optineurin [Source:HGNC Symbol;Acc:HGNC:17142]	1.12580702798181	2.06455397407976e-27	3.7419567258642e-26
ENSG00000224294		101927501		3.97506262056824	2.39360528327657e-27	4.33437818298917e-26
ENSG00000092969	TGFB2	7042	transforming growth factor, beta 2 [Source:HGNC Symbol;Acc:HGNC:11768]	1.25860118856776	2.57045085098954e-27	4.65035045898804e-26
ENSG00000154473	BUB3	9184	BUB3 mitotic checkpoint protein [Source:HGNC Symbol;Acc:HGNC:1151]	-0.989707029890498	2.72554922427748e-27	4.92372879412548e-26
ENSG00000250565	ATP6V1E2	90423	ATPase, H+ transporting, lysosomal 31kDa, V1 subunit E2 [Source:HGNC Symbol;Acc:HGNC:18125]	-1.18095954985674	2.72654348085304e-27	4.92372879412548e-26
ENSG00000132773	TOE1	114034	target of EGR1, member 1 (nuclear) [Source:HGNC Symbol;Acc:HGNC:15954]	-1.31641956924542	2.79746056945865e-27	5.04718091417581e-26
ENSG00000106258	CYP3A5	1577	cytochrome P450, family 3, subfamily A, polypeptide 5 [Source:HGNC Symbol;Acc:HGNC:2638]	1.80066470923362	2.9297956388265e-27	5.28111702925696e-26
ENSG00000110108	TMEM109	79073	transmembrane protein 109 [Source:HGNC Symbol;Acc:HGNC:28771]	-0.992942339235691	3.06258638171887e-27	5.5154472704866e-26
ENSG00000120647	CCDC77	84318	coiled-coil domain containing 77 [Source:HGNC Symbol;Acc:HGNC:28203]	-1.19990694163809	3.15156177025785e-27	5.67051496659509e-26
ENSG00000135919	SERPINE2	5270	serpin peptidase inhibitor, clade E (nexin, plasminogen activator inhibitor type 1), member 2 [Source:HGNC Symbol;Acc:HGNC:8951]	1.70460452235723	3.17887509498899e-27	5.71445462935419e-26
ENSG00000183049	CAMK1D	57118	calcium/calmodulin-dependent protein kinase ID [Source:HGNC Symbol;Acc:HGNC:19341]	1.11466558238515	3.30897992141977e-27	5.9429279388699e-26
ENSG00000229656		101929475		1.37666801681388	3.51533957622462e-27	6.30781550117108e-26
ENSG00000115128	SF3B6	51639	splicing factor 3b, subunit 6, 14kDa [Source:HGNC Symbol;Acc:HGNC:30096]	-0.960208924876285	3.59440577249693e-27	6.44383670067598e-26
ENSG00000108671	PSMD11	5717	proteasome (prosome, macropain) 26S subunit, non-ATPase, 11 [Source:HGNC Symbol;Acc:HGNC:9556]	-0.958673483117463	4.0308706993036e-27	7.21975353902465e-26
ENSG00000277586	NEFL	4747	neurofilament, light polypeptide [Source:HGNC Symbol;Acc:HGNC:7739]	1.95320754868281	4.09217960981341e-27	7.32292575828566e-26
ENSG00000156042	CFAP70	118491	cilia and flagella associated protein 70 [Source:HGNC Symbol;Acc:HGNC:30726]	2.42122048995968	4.15595967261728e-27	7.43032934771285e-26
ENSG00000143278	F13B	2165	coagulation factor XIII, B polypeptide [Source:HGNC Symbol;Acc:HGNC:3534]	3.36060314105071	4.18292551329014e-27	7.47177906334177e-26
ENSG00000152240	HAUS1	115106	HAUS augmin-like complex, subunit 1 [Source:HGNC Symbol;Acc:HGNC:25174]	-1.15917323764451	4.24902689540575e-27	7.58299686952448e-26
ENSG00000141682	PMAIP1	5366	phorbol-12-myristate-13-acetate-induced protein 1 [Source:HGNC Symbol;Acc:HGNC:9108]	0.979101640277628	4.8396131292816e-27	8.62918745325697e-26
ENSG00000162073	PAQR4	124222	progestin and adipoQ receptor family member IV [Source:HGNC Symbol;Acc:HGNC:26386]	-1.26575436684612	5.06364220303464e-27	9.02049732760617e-26
ENSG00000143079	CTTNBP2NL	55917	CTTNBP2 N-terminal like [Source:HGNC Symbol;Acc:HGNC:25330]	1.01748966965528	5.25868286964629e-27	9.35950799754343e-26
ENSG00000106785	TRIM14	9830	tripartite motif containing 14 [Source:HGNC Symbol;Acc:HGNC:16283]	1.04650807975998	5.49366251482821e-27	9.76892859072422e-26
ENSG00000128245	YWHAH	7533	tyrosine 3-monooxygenase/tryptophan 5-monooxygenase activation protein, eta [Source:HGNC Symbol;Acc:HGNC:12853]	-1.00992302460381	5.75239850895361e-27	1.0219818789828e-25
ENSG00000118777	ABCG2	9429	ATP-binding cassette, sub-family G (WHITE), member 2 (Junior blood group) [Source:HGNC Symbol;Acc:HGNC:74]	-1.02972886976419	6.16235320519418e-27	1.09383153568568e-25
ENSG00000176148	TCP11L1	55346	t-complex 11, testis-specific-like 1 [Source:HGNC Symbol;Acc:HGNC:25655]	0.959196752495931	7.02407454735226e-27	1.24566980931321e-25
ENSG00000164985	PSIP1	11168	PC4 and SFRS1 interacting protein 1 [Source:HGNC Symbol;Acc:HGNC:9527]	-0.96734149786791	7.53171733596817e-27	1.33449872367163e-25
ENSG00000138829	FBN2	2201	fibrillin 2 [Source:HGNC Symbol;Acc:HGNC:3604]	1.37691333660431	7.58948280223967e-27	1.34352887312766e-25
ENSG00000215769		146880		1.2050975812253	7.68415777794519e-27	1.35907091370712e-25
ENSG00000127415	IDUA	3425	iduronidase, alpha-L- [Source:HGNC Symbol;Acc:HGNC:5391]	1.36329223186778	8.39130939345034e-27	1.48281492287124e-25
ENSG00000182871	COL18A1	80781	collagen, type XVIII, alpha 1 [Source:HGNC Symbol;Acc:HGNC:2195]	1.1667631010773	8.43221688469217e-27	1.48871203551366e-25
ENSG00000260238	PMF1-BGLAP	100527963	PMF1-BGLAP readthrough [Source:HGNC Symbol;Acc:HGNC:42953]	-1.48321726889505	8.74145482048515e-27	1.54193019137058e-25
ENSG00000132341	RAN	5901	RAN, member RAS oncogene family [Source:HGNC Symbol;Acc:HGNC:9846]	-1.21354679238468	8.99256894786413e-27	1.58480992090994e-25
ENSG00000011485	PPP5C	5536	protein phosphatase 5, catalytic subunit [Source:HGNC Symbol;Acc:HGNC:9322]	-0.947763394675187	9.31606594686149e-27	1.64035827848659e-25
ENSG00000186815	TPCN1	53373	two pore segment channel 1 [Source:HGNC Symbol;Acc:HGNC:18182]	0.988074829701188	9.45398461939961e-27	1.66316046429972e-25
ENSG00000117266	CDK18	5129	cyclin-dependent kinase 18 [Source:HGNC Symbol;Acc:HGNC:8751]	2.50982917508141	1.00338238294213e-26	1.76359629514278e-25
ENSG00000260604		NA		2.30900837529725	1.09650110788049e-26	1.92555341220328e-25
ENSG00000100918	REC8	9985	REC8 meiotic recombination protein [Source:HGNC Symbol;Acc:HGNC:16879]	1.84627511952289	1.10507287449746e-26	1.93888274498862e-25
ENSG00000109084	TMEM97	27346	transmembrane protein 97 [Source:HGNC Symbol;Acc:HGNC:28106]	-1.06593695162432	1.13940261297668e-26	1.99734143939373e-25
ENSG00000240602	AADACP1	201651	arylacetamide deacetylase pseudogene 1 [Source:HGNC Symbol;Acc:HGNC:50305]	1.06220966169323	1.26215663546227e-26	2.21056440515892e-25
ENSG00000085415	SEH1L	81929	SEH1-like (S. cerevisiae) [Source:HGNC Symbol;Acc:HGNC:30379]	-1.14283706774633	1.29450542217574e-26	2.26521249960177e-25
ENSG00000157542	KCNJ6	3763	potassium channel, inwardly rectifying subfamily J, member 6 [Source:HGNC Symbol;Acc:HGNC:6267]	2.0623751659188	1.29879007573349e-26	2.27069882621158e-25
ENSG00000076067	RBMS2	5939	RNA binding motif, single stranded interacting protein 2 [Source:HGNC Symbol;Acc:HGNC:9909]	0.887800815253817	1.3082515508366e-26	2.28521818199186e-25
ENSG00000164342	TLR3	7098	toll-like receptor 3 [Source:HGNC Symbol;Acc:HGNC:11849]	2.00813096158714	1.34403106578483e-26	2.34564290950928e-25
ENSG00000108384	RAD51C	5889	RAD51 paralog C [Source:HGNC Symbol;Acc:HGNC:9820]	-1.06968303305443	1.38625958624807e-26	2.41720603582672e-25
ENSG00000103121	CMC2	56942	C-x(9)-C motif containing 2 [Source:HGNC Symbol;Acc:HGNC:24447]	-1.09028176208762	1.40203772248928e-26	2.44256236732789e-25
ENSG00000184220	CMSS1	84319	cms1 ribosomal small subunit homolog (yeast) [Source:HGNC Symbol;Acc:HGNC:28666]	-1.07776822461354	1.44148224820501e-26	2.50906813176548e-25
ENSG00000160447	PKN3	29941	protein kinase N3 [Source:HGNC Symbol;Acc:HGNC:17999]	-1.23301899573827	1.52185701486072e-26	2.64663795647786e-25
ENSG00000079308	TNS1	7145	tensin 1 [Source:HGNC Symbol;Acc:HGNC:11973]	2.61662518738886	1.58599218102545e-26	2.75574859528045e-25
ENSG00000104980	TIMM44	10469	translocase of inner mitochondrial membrane 44 homolog (yeast) [Source:HGNC Symbol;Acc:HGNC:17316]	-1.18654016105153	1.79554496149475e-26	3.11711654299563e-25
ENSG00000125462	C1orf61	10485	chromosome 1 open reading frame 61 [Source:HGNC Symbol;Acc:HGNC:30780]	-1.57478802352477	1.82752900503902e-26	3.16985627950404e-25
ENSG00000100031	GGT1	2678,91227,92086,728441,102724197	gamma-glutamyltransferase 1 [Source:HGNC Symbol;Acc:HGNC:4250]	0.922920677836418	1.87888414027813e-26	3.25607325222234e-25
ENSG00000140350	ANP32A	8125	acidic (leucine-rich) nuclear phosphoprotein 32 family, member A [Source:HGNC Symbol;Acc:HGNC:13233]	-0.979232382961236	2.03260998844388e-26	3.51939026570529e-25
ENSG00000265818	EEF1E1-BLOC1S5	NA	EEF1E1-BLOC1S5 readthrough (NMD candidate) [Source:HGNC Symbol;Acc:HGNC:49187]	-1.21674958104461	2.17432496319531e-26	3.76146794858902e-25
ENSG00000214706	IFRD2	7866	interferon-related developmental regulator 2 [Source:HGNC Symbol;Acc:HGNC:5457]	-1.02127827383544	2.25234135053864e-26	3.89302324770265e-25
ENSG00000125743	SNRPD2	6633	small nuclear ribonucleoprotein D2 polypeptide 16.5kDa [Source:HGNC Symbol;Acc:HGNC:11159]	-0.975461879796433	2.26651566863591e-26	3.91409821237509e-25
ENSG00000165916	PSMC3	5702	proteasome (prosome, macropain) 26S subunit, ATPase, 3 [Source:HGNC Symbol;Acc:HGNC:9549]	-1.11947343728533	2.32493441436392e-26	4.01147635722041e-25
ENSG00000137449	CPEB2	132864	cytoplasmic polyadenylation element binding protein 2 [Source:HGNC Symbol;Acc:HGNC:21745]	1.03883345147449	2.40686748278461e-26	4.14922111604649e-25
ENSG00000276851		NA		2.5195175509254	2.46493283572858e-26	4.24246951588362e-25
ENSG00000179630	LACC1	144811	laccase (multicopper oxidoreductase) domain containing 1 [Source:HGNC Symbol;Acc:HGNC:26789]	1.19611274925894	2.46525359598826e-26	4.24246951588362e-25
ENSG00000100029	PES1	23481	pescadillo ribosomal biogenesis factor 1 [Source:HGNC Symbol;Acc:HGNC:8848]	-0.895399750728928	2.60659904100666e-26	4.48180771576393e-25
ENSG00000143507	DUSP10	11221	dual specificity phosphatase 10 [Source:HGNC Symbol;Acc:HGNC:3065]	1.18579387953324	2.62251809857871e-26	4.50525804830617e-25
ENSG00000109846	CRYAB	1410	crystallin, alpha B [Source:HGNC Symbol;Acc:HGNC:2389]	3.79791920815861	2.76868406538964e-26	4.75222609868268e-25
ENSG00000180354	MTURN	222166	maturin, neural progenitor differentiation regulator homolog (Xenopus) [Source:HGNC Symbol;Acc:HGNC:25457]	1.42237578628575	2.8137180111535e-26	4.82533099204415e-25
ENSG00000133393	FOPNL	123811	FGFR1OP N-terminal like [Source:HGNC Symbol;Acc:HGNC:26435]	-1.05504302645684	3.07308702268665e-26	5.26556003644384e-25
ENSG00000166986	MARS	4141	methionyl-tRNA synthetase [Source:HGNC Symbol;Acc:HGNC:6898]	-0.918851943456158	3.18697574944538e-26	5.45596992253406e-25
ENSG00000166197	NOLC1	9221	nucleolar and coiled-body phosphoprotein 1 [Source:HGNC Symbol;Acc:HGNC:15608]	-1.04161117195083	3.58123949219801e-26	6.12562488379775e-25
ENSG00000178074	C2orf69	205327	chromosome 2 open reading frame 69 [Source:HGNC Symbol;Acc:HGNC:26799]	-1.08026006483136	3.65982618829265e-26	6.25463029203371e-25
ENSG00000143412	ANXA9	8416	annexin A9 [Source:HGNC Symbol;Acc:HGNC:547]	1.97490985494253	4.00643640487837e-26	6.84106807387874e-25
ENSG00000185070	FLRT2	23768	fibronectin leucine rich transmembrane protein 2 [Source:HGNC Symbol;Acc:HGNC:3761]	1.71791812214185	4.05204213870016e-26	6.9129658456097e-25
ENSG00000177989	ODF3B	440836	outer dense fiber of sperm tails 3B [Source:HGNC Symbol;Acc:HGNC:34388]	1.93663087208001	4.08882301642515e-26	6.96969693809278e-25
ENSG00000136235	GPNMB	10457	glycoprotein (transmembrane) nmb [Source:HGNC Symbol;Acc:HGNC:4462]	1.69173100442738	4.14046594037693e-26	7.05164182052471e-25
ENSG00000196363	WDR5	11091	WD repeat domain 5 [Source:HGNC Symbol;Acc:HGNC:12757]	-0.988540158991532	4.45345481837269e-26	7.57816136018698e-25
ENSG00000012963	UBR7	55148	ubiquitin protein ligase E3 component n-recognin 7 (putative) [Source:HGNC Symbol;Acc:HGNC:20344]	-1.07371378103572	4.50952843510609e-26	7.66697450636454e-25
ENSG00000168477	TNXB	7148	tenascin XB [Source:HGNC Symbol;Acc:HGNC:11976]	2.29648464454568	4.68867893598351e-26	7.96470688385987e-25
ENSG00000261061		NA		-1.86975698748716	4.88885704167125e-26	8.29761681402553e-25
ENSG00000115461	IGFBP5	3488	insulin-like growth factor binding protein 5 [Source:HGNC Symbol;Acc:HGNC:5474]	3.74286341296315	4.96295439447694e-26	8.41614824182716e-25
ENSG00000171246	NPTX1	4884	neuronal pentraxin I [Source:HGNC Symbol;Acc:HGNC:7952]	-1.21189233861694	5.10711001661353e-26	8.65317885833764e-25
ENSG00000084463	WBP11	51729	WW domain binding protein 11 [Source:HGNC Symbol;Acc:HGNC:16461]	-0.927415159223081	5.54525003776167e-26	9.38748583941898e-25
ENSG00000078668	VDAC3	7419	voltage-dependent anion channel 3 [Source:HGNC Symbol;Acc:HGNC:12674]	-0.95404385734221	5.8856245148945e-26	9.95517105447394e-25
ENSG00000162687	KCNT2	343450	potassium channel, sodium activated subfamily T, member 2 [Source:HGNC Symbol;Acc:HGNC:18866]	2.11079318494956	6.4935923577038e-26	1.09741155362529e-24
ENSG00000164934	DCAF13	25879	DDB1 and CUL4 associated factor 13 [Source:HGNC Symbol;Acc:HGNC:24535]	-0.892385262939498	6.76998584174058e-26	1.14314393409767e-24
ENSG00000205592	MUC19	NA	mucin 19, oligomeric [Source:HGNC Symbol;Acc:HGNC:14362]	2.36131683164042	6.86949567996734e-26	1.1589560773137e-24
ENSG00000116830	TTF2	8458	transcription termination factor, RNA polymerase II [Source:HGNC Symbol;Acc:HGNC:12398]	-0.991485310342453	6.96457168397772e-26	1.1739938412002e-24
ENSG00000110046	ATG2A	23130	autophagy related 2A [Source:HGNC Symbol;Acc:HGNC:29028]	1.02452326085354	7.04497920593657e-26	1.18653545773643e-24
ENSG00000111666	CHPT1	56994	choline phosphotransferase 1 [Source:HGNC Symbol;Acc:HGNC:17852]	-1.00360639787577	7.24124345359837e-26	1.21855200740451e-24
ENSG00000030582	GRN	2896	granulin [Source:HGNC Symbol;Acc:HGNC:4601]	1.06433615495572	7.44602532718393e-26	1.25194618181996e-24
ENSG00000167123	CERCAM	51148	cerebral endothelial cell adhesion molecule [Source:HGNC Symbol;Acc:HGNC:23723]	1.15359239396054	7.46879991917674e-26	1.25470757825898e-24
ENSG00000104472	CHRAC1	54108	chromatin accessibility complex 1 [Source:HGNC Symbol;Acc:HGNC:13544]	-1.23693486877944	7.75565291155111e-26	1.30178996534073e-24
ENSG00000267041	ZNF850	342892	zinc finger protein 850 [Source:HGNC Symbol;Acc:HGNC:27994]	-1.58506970403506	8.12503973999821e-26	1.36263399918001e-24
ENSG00000100281	HMGXB4	10042	HMG box domain containing 4 [Source:HGNC Symbol;Acc:HGNC:5003]	-1.01563778764988	8.68020678154084e-26	1.4545052177788e-24
ENSG00000172936	MYD88	4615	myeloid differentiation primary response 88 [Source:HGNC Symbol;Acc:HGNC:7562]	0.998058332936344	8.68937812490445e-26	1.45480808674248e-24
ENSG00000128596	CCDC136	64753	coiled-coil domain containing 136 [Source:HGNC Symbol;Acc:HGNC:22225]	1.68843805136087	8.79630228145812e-26	1.47146272542326e-24
ENSG00000114767	RRP9	9136	ribosomal RNA processing 9, small subunit (SSU) processome component, homolog (yeast) [Source:HGNC Symbol;Acc:HGNC:16829]	-1.0665897255872	9.07120509226938e-26	1.51616520983819e-24
ENSG00000108064	TFAM	7019	transcription factor A, mitochondrial [Source:HGNC Symbol;Acc:HGNC:11741]	-0.899760373329269	9.17180850574457e-26	1.53168426745131e-24
ENSG00000107819	SFXN3	81855	sideroflexin 3 [Source:HGNC Symbol;Acc:HGNC:16087]	1.08409560689977	9.49893369523456e-26	1.5849741054312e-24
ENSG00000167566	NCKAP5L	57701	NCK-associated protein 5-like [Source:HGNC Symbol;Acc:HGNC:29321]	0.981827269671289	9.69639642125695e-26	1.61655702699032e-24
ENSG00000215492	HNRNPA1P7	NA	heterogeneous nuclear ribonucleoprotein A1 pseudogene 7 [Source:HGNC Symbol;Acc:HGNC:31015]	-1.08491804984117	1.05207513250008e-25	1.7525123370718e-24
ENSG00000162772	ATF3	467	activating transcription factor 3 [Source:HGNC Symbol;Acc:HGNC:785]	1.93934563455825	1.07805225605111e-25	1.79427130333156e-24
ENSG00000203780	FANK1	92565	fibronectin type III and ankyrin repeat domains 1 [Source:HGNC Symbol;Acc:HGNC:23527]	2.09248004219827	1.07901046022669e-25	1.7943544320066e-24
ENSG00000105327	BBC3	27113	BCL2 binding component 3 [Source:HGNC Symbol;Acc:HGNC:17868]	1.29754393732976	1.08312455346746e-25	1.79968113358311e-24
ENSG00000268621		NA		1.31563586019723	1.19851238269162e-25	1.98973198592064e-24
ENSG00000122140	MRPS2	51116	mitochondrial ribosomal protein S2 [Source:HGNC Symbol;Acc:HGNC:14495]	-1.08351081912356	1.2090731044937e-25	2.00557919835244e-24
ENSG00000114698	PLSCR4	57088	phospholipid scramblase 4 [Source:HGNC Symbol;Acc:HGNC:16497]	1.35694426093327	1.23905989206031e-25	2.05359624392143e-24
ENSG00000187522	HSPA14	51182	heat shock 70kDa protein 14 [Source:HGNC Symbol;Acc:HGNC:29526]	-1.01102242070601	1.40985976057955e-25	2.33471830930508e-24
ENSG00000151576	QTRTD1	79691	queuine tRNA-ribosyltransferase domain containing 1 [Source:HGNC Symbol;Acc:HGNC:25771]	-0.866336065387421	1.4539816426919e-25	2.40576728082255e-24
ENSG00000151914	DST	667	dystonin [Source:HGNC Symbol;Acc:HGNC:1090]	1.43652277048958	1.49089305359483e-25	2.46477683404346e-24
ENSG00000107949	BCCIP	56647	BRCA2 and CDKN1A interacting protein [Source:HGNC Symbol;Acc:HGNC:978]	-1.00244015813581	1.57331322812085e-25	2.5988608808324e-24
ENSG00000106588	PSMA2	5683	proteasome (prosome, macropain) subunit, alpha type, 2 [Source:HGNC Symbol;Acc:HGNC:9531]	-0.960922205730449	1.58061068629748e-25	2.60873389461095e-24
ENSG00000198520	C1orf228	339541	chromosome 1 open reading frame 228 [Source:HGNC Symbol;Acc:HGNC:34345]	2.43994319538603	1.597466726746e-25	2.63435330998281e-24
ENSG00000125505	MBOAT7	79143	membrane bound O-acyltransferase domain containing 7 [Source:HGNC Symbol;Acc:HGNC:15505]	0.920695797895669	1.65244799647e-25	2.72274917583498e-24
ENSG00000135636	DYSF	8291	dysferlin [Source:HGNC Symbol;Acc:HGNC:3097]	3.14299935942823	1.74078936899378e-25	2.86591956448676e-24
ENSG00000184985	SORCS2	57537	sortilin-related VPS10 domain containing receptor 2 [Source:HGNC Symbol;Acc:HGNC:16698]	2.05962177609305	1.81551525735779e-25	2.98645457321903e-24
ENSG00000185339	TCN2	6948	transcobalamin II [Source:HGNC Symbol;Acc:HGNC:11653]	1.29264302911916	1.87574926780274e-25	3.08297026079126e-24
ENSG00000148459	PDSS1	23590	prenyl (decaprenyl) diphosphate synthase, subunit 1 [Source:HGNC Symbol;Acc:HGNC:17759]	-1.39675777640842	1.90048031508476e-25	3.12102153822233e-24
ENSG00000232445		101927746		-1.87216225047429	1.93519928097566e-25	3.1753984215079e-24
ENSG00000197498	RPF2	84154	ribosome production factor 2 homolog (S. cerevisiae) [Source:HGNC Symbol;Acc:HGNC:20870]	-1.02066145674678	1.9383986377016e-25	3.17800858808571e-24
ENSG00000128383	APOBEC3A	200315,100913187	apolipoprotein B mRNA editing enzyme, catalytic polypeptide-like 3A [Source:HGNC Symbol;Acc:HGNC:17343]	-3.21611892337684	1.9477157695993e-25	3.19063621427892e-24
ENSG00000148688	RPP30	10556	ribonuclease P/MRP 30kDa subunit [Source:HGNC Symbol;Acc:HGNC:17688]	-1.01376813896941	1.95301263294654e-25	3.19666259954364e-24
ENSG00000167130	DOLPP1	57171	dolichyldiphosphatase 1 [Source:HGNC Symbol;Acc:HGNC:29565]	-1.03756360831041	1.98163331119942e-25	3.24082348477283e-24
ENSG00000089280	FUS	2521	FUS RNA binding protein [Source:HGNC Symbol;Acc:HGNC:4010]	-0.940583951033908	2.01918631414101e-25	3.29950742945987e-24
ENSG00000134668	SPOCD1	90853	SPOC domain containing 1 [Source:HGNC Symbol;Acc:HGNC:26338]	2.79812008474495	2.08085849385068e-25	3.3974744135962e-24
ENSG00000184575	XPOT	11260	exportin, tRNA [Source:HGNC Symbol;Acc:HGNC:12826]	-0.974642902124919	2.12610717810471e-25	3.46848665653482e-24
ENSG00000110628	SLC22A18	5002	solute carrier family 22, member 18 [Source:HGNC Symbol;Acc:HGNC:10964]	1.15256732140142	2.1304188400482e-25	3.47265302013137e-24
ENSG00000215375	MYL5	4636	myosin, light chain 5, regulatory [Source:HGNC Symbol;Acc:HGNC:7586]	1.4440193574933	2.17205846016467e-25	3.53760815655509e-24
ENSG00000171792	RHNO1	83695	RAD9-HUS1-RAD1 interacting nuclear orphan 1 [Source:HGNC Symbol;Acc:HGNC:28206]	-1.11923517561684	2.29382236126238e-25	3.73284634012353e-24
ENSG00000139579	NABP2	79035	nucleic acid binding protein 2 [Source:HGNC Symbol;Acc:HGNC:28412]	-1.03034217971688	2.54429176122293e-25	4.13703934442141e-24
ENSG00000196739	COL27A1	85301	collagen, type XXVII, alpha 1 [Source:HGNC Symbol;Acc:HGNC:22986]	1.03989433438434	2.65920080737405e-25	4.32032657487515e-24
ENSG00000144802	NFKBIZ	64332	nuclear factor of kappa light polypeptide gene enhancer in B-cells inhibitor, zeta [Source:HGNC Symbol;Acc:HGNC:29805]	1.39455371177899	2.75957258710328e-25	4.4797137247997e-24
ENSG00000108468	CBX1	10951	chromobox homolog 1 [Source:HGNC Symbol;Acc:HGNC:1551]	-0.978065440312831	2.82338019810084e-25	4.57953195350412e-24
ENSG00000162614	NEXN	91624	nexilin (F actin binding protein) [Source:HGNC Symbol;Acc:HGNC:29557]	1.8382700378754	2.84262775097116e-25	4.60696914259117e-24
ENSG00000120053	GOT1	2805	glutamic-oxaloacetic transaminase 1, soluble [Source:HGNC Symbol;Acc:HGNC:4432]	-0.932469931266208	2.89905812675798e-25	4.69457314362547e-24
ENSG00000100867	DHRS2	10202	dehydrogenase/reductase (SDR family) member 2 [Source:HGNC Symbol;Acc:HGNC:18349]	1.67926234523833	2.99314980617961e-25	4.84297031702575e-24
ENSG00000165637	VDAC2	7417	voltage-dependent anion channel 2 [Source:HGNC Symbol;Acc:HGNC:12672]	-0.90747035769794	3.01055581270773e-25	4.86714735154288e-24
ENSG00000100767	PAPLN	89932	papilin, proteoglycan-like sulfated glycoprotein [Source:HGNC Symbol;Acc:HGNC:19262]	1.54143753732217	3.13645452310698e-25	5.06654092874093e-24
ENSG00000076706	MCAM	4162	melanoma cell adhesion molecule [Source:HGNC Symbol;Acc:HGNC:6934]	1.65930406449562	3.36244977830257e-25	5.42716975654785e-24
ENSG00000196935	SRGAP1	57522	SLIT-ROBO Rho GTPase activating protein 1 [Source:HGNC Symbol;Acc:HGNC:17382]	0.893561310274138	3.39299693014836e-25	5.47200386547029e-24
ENSG00000243323	PTPRVP	148713	protein tyrosine phosphatase, receptor type, V, pseudogene [Source:HGNC Symbol;Acc:HGNC:13421]	3.48448462003378	3.83482463376776e-25	6.17951023366361e-24
ENSG00000063244	U2AF2	11338	U2 small nuclear RNA auxiliary factor 2 [Source:HGNC Symbol;Acc:HGNC:23156]	-0.983184123130957	3.89547304985926e-25	6.27212433357943e-24
ENSG00000054793	ATP9A	10079	ATPase, class II, type 9A [Source:HGNC Symbol;Acc:HGNC:13540]	0.875468476619717	4.03053077887916e-25	6.48429691103719e-24
ENSG00000132661	NXT1	29107	nuclear transport factor 2-like export factor 1 [Source:HGNC Symbol;Acc:HGNC:15913]	-1.35243283542243	4.06512644685623e-25	6.53463287909615e-24
ENSG00000100299	ARSA	410	arylsulfatase A [Source:HGNC Symbol;Acc:HGNC:713]	1.11118629988161	4.18868284335507e-25	6.72777384173356e-24
ENSG00000197275	RAD54B	25788	RAD54 homolog B (S. cerevisiae) [Source:HGNC Symbol;Acc:HGNC:17228]	-0.96661715421411	4.22598235308314e-25	6.78216956681645e-24
ENSG00000011260	UTP18	51096	UTP18 small subunit (SSU) processome component homolog (yeast) [Source:HGNC Symbol;Acc:HGNC:24274]	-0.872350029658094	4.25881458585207e-25	6.82460521526776e-24
ENSG00000101197	BIRC7	79444	baculoviral IAP repeat containing 7 [Source:HGNC Symbol;Acc:HGNC:13702]	1.73414442080528	4.25933297753855e-25	6.82460521526776e-24
ENSG00000204580	DDR1	780	discoidin domain receptor tyrosine kinase 1 [Source:HGNC Symbol;Acc:HGNC:2730]	0.845910424917616	4.35579603628203e-25	6.97350944025833e-24
ENSG00000010818	HIVEP2	3097	human immunodeficiency virus type I enhancer binding protein 2 [Source:HGNC Symbol;Acc:HGNC:4921]	1.07281749854335	4.51449544500207e-25	7.2217305272438e-24
ENSG00000100139	MICALL1	85377	MICAL-like 1 [Source:HGNC Symbol;Acc:HGNC:29804]	1.0692561973753	4.52348886315311e-25	7.23026261977774e-24
ENSG00000127804	METTL16	79066	methyltransferase like 16 [Source:HGNC Symbol;Acc:HGNC:28484]	-0.878220154677145	4.77457932763022e-25	7.62543162462916e-24
ENSG00000039068	CDH1	999	cadherin 1, type 1, E-cadherin (epithelial) [Source:HGNC Symbol;Acc:HGNC:1748]	1.16604601673444	5.01719841494309e-25	8.00644360950046e-24
ENSG00000075426	FOSL2	2355	FOS-like antigen 2 [Source:HGNC Symbol;Acc:HGNC:3798]	1.04886706389829	5.1468696922802e-25	8.20674395808618e-24
ENSG00000140961	OSGIN1	29948	oxidative stress induced growth inhibitor 1 [Source:HGNC Symbol;Acc:HGNC:30093]	-1.06168761567469	5.25485178924272e-25	8.37216547969993e-24
ENSG00000173456	RNF26	79102	ring finger protein 26 [Source:HGNC Symbol;Acc:HGNC:14646]	-1.22251762646128	5.34185951065995e-25	8.50393041842047e-24
ENSG00000178860	MSC	9242	musculin [Source:HGNC Symbol;Acc:HGNC:7321]	1.22130096413117	5.57387784811489e-25	8.86614579447325e-24
ENSG00000231131	LINC01468	101928687	long intergenic non-protein coding RNA 1468 [Source:HGNC Symbol;Acc:HGNC:50913]	1.32696003873726	5.88319149791833e-25	9.35063002677992e-24
ENSG00000103021	CCDC113	29070	coiled-coil domain containing 113 [Source:HGNC Symbol;Acc:HGNC:25002]	1.13861597951227	7.02871360549268e-25	1.11623204172117e-23
ENSG00000198912	C1orf174	339448	chromosome 1 open reading frame 174 [Source:HGNC Symbol;Acc:HGNC:27915]	-1.08992262512483	7.22417199743485e-25	1.14635134121544e-23
ENSG00000140365	COMMD4	54939	COMM domain containing 4 [Source:HGNC Symbol;Acc:HGNC:26027]	-0.888918850263307	7.54972402705519e-25	1.19704934091896e-23
ENSG00000239900	ADSL	158	adenylosuccinate lyase [Source:HGNC Symbol;Acc:HGNC:291]	-0.94021578745251	7.61078426478633e-25	1.20576306283175e-23
ENSG00000100462	PRMT5	10419	protein arginine methyltransferase 5 [Source:HGNC Symbol;Acc:HGNC:10894]	-0.919895644064576	7.8350586716272e-25	1.2402998326656e-23
ENSG00000102393	GLA	2717	galactosidase, alpha [Source:HGNC Symbol;Acc:HGNC:4296]	-0.97102625824349	7.86564871233964e-25	1.24414536397904e-23
ENSG00000276087		NA	Uncharacterized protein [Source:UniProtKB/TrEMBL;Acc:A0A087X0T9]	1.8277273628944	8.17260486311563e-25	1.2916638534057e-23
ENSG00000144824	PHLDB2	90102	pleckstrin homology-like domain, family B, member 2 [Source:HGNC Symbol;Acc:HGNC:29573]	1.18333675637603	8.43431832978576e-25	1.33196157412668e-23
ENSG00000205363	C15orf59	388135	chromosome 15 open reading frame 59 [Source:HGNC Symbol;Acc:HGNC:33753]	2.14599205512686	8.8589425900597e-25	1.39790151604808e-23
ENSG00000100138	NHP2L1	4809	NHP2 non-histone chromosome protein 2-like 1 (S. cerevisiae) [Source:HGNC Symbol;Acc:HGNC:7819]	-0.948758120125077	9.23253070960551e-25	1.45568935912982e-23
ENSG00000106686	SPATA6L	55064	spermatogenesis associated 6-like [Source:HGNC Symbol;Acc:HGNC:25472]	1.90263756081783	9.4610437069989e-25	1.49052934190965e-23
ENSG00000139132	FGD4	121512	FYVE, RhoGEF and PH domain containing 4 [Source:HGNC Symbol;Acc:HGNC:19125]	1.0028450247725	9.5775021984799e-25	1.50767436998541e-23
ENSG00000152409	JMY	133746	junction mediating and regulatory protein, p53 cofactor [Source:HGNC Symbol;Acc:HGNC:28916]	0.883802633103987	9.60369009036672e-25	1.51059316421405e-23
ENSG00000187325	TAF9B	51616	TAF9B RNA polymerase II, TATA box binding protein (TBP)-associated factor, 31kDa [Source:HGNC Symbol;Acc:HGNC:17306]	-1.21767327932347	9.83362661656493e-25	1.54553005120809e-23
ENSG00000136811	ODF2	4957	outer dense fiber of sperm tails 2 [Source:HGNC Symbol;Acc:HGNC:8114]	-0.868526948323672	1.07988488116158e-24	1.69588280701336e-23
ENSG00000113231	PDE8B	8622	phosphodiesterase 8B [Source:HGNC Symbol;Acc:HGNC:8794]	1.42626869621143	1.08185703424647e-24	1.69763046612973e-23
ENSG00000164308	ERAP2	64167	endoplasmic reticulum aminopeptidase 2 [Source:HGNC Symbol;Acc:HGNC:29499]	1.50609888509102	1.18363545277706e-24	1.85586523849712e-23
ENSG00000188610	FAM72B	653820	family with sequence similarity 72, member B [Source:HGNC Symbol;Acc:HGNC:24805]	-2.26233086215772	1.28638429997539e-24	2.01536940763789e-23
ENSG00000023041	ZDHHC6	64429	zinc finger, DHHC-type containing 6 [Source:HGNC Symbol;Acc:HGNC:19160]	-0.895277603782057	1.34544407945927e-24	2.10622767304257e-23
ENSG00000204264	PSMB8	5696	proteasome (prosome, macropain) subunit, beta type, 8 [Source:HGNC Symbol;Acc:HGNC:9545]	1.13891792813566	1.38564971672738e-24	2.16745018239637e-23
ENSG00000105866	SP4	6671	Sp4 transcription factor [Source:HGNC Symbol;Acc:HGNC:11209]	-1.59375287345713	1.44185347737278e-24	2.25358048251398e-23
ENSG00000006576	PHTF2	57157	putative homeodomain transcription factor 2 [Source:HGNC Symbol;Acc:HGNC:13411]	-0.883753132451561	1.45701162841987e-24	2.27547207360181e-23
ENSG00000176714	CCDC121	79635	coiled-coil domain containing 121 [Source:HGNC Symbol;Acc:HGNC:25833]	-1.65499064495131	1.50133663798928e-24	2.34284412481171e-23
ENSG00000040531	CTNS	1497	cystinosin, lysosomal cystine transporter [Source:HGNC Symbol;Acc:HGNC:2518]	-1.31640091899638	1.72013458422737e-24	2.68216091917884e-23
ENSG00000004478	FKBP4	2288	FK506 binding protein 4, 59kDa [Source:HGNC Symbol;Acc:HGNC:3720]	-0.973032124314162	1.79104149918014e-24	2.79052175534723e-23
ENSG00000215252	GOLGA8B	23015,440270	golgin A8 family, member B [Source:HGNC Symbol;Acc:HGNC:31973]	1.20158594953907	1.8829777382367e-24	2.9314506065094e-23
ENSG00000091262	ABCC6	368,105369239	ATP-binding cassette, sub-family C (CFTR/MRP), member 6 [Source:HGNC Symbol;Acc:HGNC:57]	2.16372426087546	1.97526146015667e-24	3.07269806353191e-23
ENSG00000168476	REEP4	80346	receptor accessory protein 4 [Source:HGNC Symbol;Acc:HGNC:26176]	-1.04078255043014	1.98667870983596e-24	3.08802711184259e-23
ENSG00000263731		NA		-1.16433979557429	2.12143916277364e-24	3.29490189463491e-23
ENSG00000185885	IFITM1	8519	interferon induced transmembrane protein 1 [Source:HGNC Symbol;Acc:HGNC:5412]	2.12992921102745	2.2417846137128e-24	3.4790806620982e-23
ENSG00000003147	ICA1	3382	islet cell autoantigen 1, 69kDa [Source:HGNC Symbol;Acc:HGNC:5343]	1.66777261395516	2.28813109921055e-24	3.54821962292022e-23
ENSG00000115828	QPCT	25797	glutaminyl-peptide cyclotransferase [Source:HGNC Symbol;Acc:HGNC:9753]	0.863681560115417	2.37180285804528e-24	3.67508527557196e-23
ENSG00000113924	HGD	3081	homogentisate 1,2-dioxygenase [Source:HGNC Symbol;Acc:HGNC:4892]	1.53823610903388	2.39526845109387e-24	3.70853632600395e-23
ENSG00000166145	SPINT1	6692	serine peptidase inhibitor, Kunitz type 1 [Source:HGNC Symbol;Acc:HGNC:11246]	2.82383032748027	2.51173157146274e-24	3.88580805997008e-23
ENSG00000164039	BDH2	56898	3-hydroxybutyrate dehydrogenase, type 2 [Source:HGNC Symbol;Acc:HGNC:32389]	1.34029423153876	2.5556956827333e-24	3.95072957027223e-23
ENSG00000214176	PLEKHM1P	NA	pleckstrin homology domain containing, family M (with RUN domain) member 1 pseudogene [Source:HGNC Symbol;Acc:HGNC:35411]	1.0841943548729	2.712297216779e-24	4.1895343092014e-23
ENSG00000170144	HNRNPA3	220988	heterogeneous nuclear ribonucleoprotein A3 [Source:HGNC Symbol;Acc:HGNC:24941]	-0.863265598671338	2.7170181902989e-24	4.19354776308946e-23
ENSG00000244694	PTCHD4	442213	patched domain containing 4 [Source:HGNC Symbol;Acc:HGNC:21345]	4.00428984989995	2.85739360588928e-24	4.40676565791948e-23
ENSG00000178691	SUZ12	23512	SUZ12 polycomb repressive complex 2 subunit [Source:HGNC Symbol;Acc:HGNC:17101]	-0.866313036575794	2.92200670497958e-24	4.50289894411674e-23
ENSG00000134369	NAV1	89796	neuron navigator 1 [Source:HGNC Symbol;Acc:HGNC:15989]	1.61043220774143	2.92927000463611e-24	4.51057351610218e-23
ENSG00000104835	SARS2	54938	seryl-tRNA synthetase 2, mitochondrial [Source:HGNC Symbol;Acc:HGNC:17697]	-0.903108665544005	2.9799681254629e-24	4.58506622170133e-23
ENSG00000035141	FAM136A	84908	family with sequence similarity 136, member A [Source:HGNC Symbol;Acc:HGNC:25911]	-0.909918571396457	3.18120832860284e-24	4.8908911859827e-23
ENSG00000108771	DHX58	79132	DEXH (Asp-Glu-X-His) box polypeptide 58 [Source:HGNC Symbol;Acc:HGNC:29517]	2.73601954629384	3.20195492926913e-24	4.91895968760816e-23
ENSG00000062582	MRPS24	64951	mitochondrial ribosomal protein S24 [Source:HGNC Symbol;Acc:HGNC:14510]	-1.05944891174093	3.36128669218868e-24	5.15971871724005e-23
ENSG00000175581	MRPL48	51642	mitochondrial ribosomal protein L48 [Source:HGNC Symbol;Acc:HGNC:16653]	-1.15286772859423	3.53394411315034e-24	5.42054347045016e-23
ENSG00000157064	NMNAT2	23057	nicotinamide nucleotide adenylyltransferase 2 [Source:HGNC Symbol;Acc:HGNC:16789]	2.49671266677351	3.55853183120952e-24	5.45402287489334e-23
ENSG00000101639	CEP192	55125	centrosomal protein 192kDa [Source:HGNC Symbol;Acc:HGNC:25515]	-0.834532488574108	3.59723293524765e-24	5.50906464098857e-23
ENSG00000074071	MRPS34	65993	mitochondrial ribosomal protein S34 [Source:HGNC Symbol;Acc:HGNC:16618]	-1.02329008972967	3.6221035753746e-24	5.54285656352444e-23
ENSG00000165661	QSOX2	169714	quiescin Q6 sulfhydryl oxidase 2 [Source:HGNC Symbol;Acc:HGNC:30249]	-0.947206613763415	4.00782997020589e-24	6.12838149314145e-23
ENSG00000142961	MOB3C	148932	MOB kinase activator 3C [Source:HGNC Symbol;Acc:HGNC:29800]	1.4704999964388	4.09814747865458e-24	6.26163972067285e-23
ENSG00000150753	CCT5	22948	chaperonin containing TCP1, subunit 5 (epsilon) [Source:HGNC Symbol;Acc:HGNC:1618]	-1.1038049736884	4.10414878028002e-24	6.26596316099011e-23
ENSG00000213024	NUP62	23636	nucleoporin 62kDa [Source:HGNC Symbol;Acc:HGNC:8066]	-0.986509720270021	4.53852227087518e-24	6.92378733462626e-23
ENSG00000166448	TMEM130	222865	transmembrane protein 130 [Source:HGNC Symbol;Acc:HGNC:25429]	2.52302309070204	4.6201803927744e-24	7.04292313577555e-23
ENSG00000132793	LPIN3	64900	lipin 3 [Source:HGNC Symbol;Acc:HGNC:14451]	1.10205762441838	4.67636524217243e-24	7.123074149912e-23
ENSG00000163950	SLBP	7884	stem-loop binding protein [Source:HGNC Symbol;Acc:HGNC:10904]	-1.03219824331548	4.84876984597346e-24	7.37999207065112e-23
ENSG00000137168	PPIL1	51645	peptidylprolyl isomerase (cyclophilin)-like 1 [Source:HGNC Symbol;Acc:HGNC:9260]	-0.98937044766291	4.87541705585898e-24	7.41483751774827e-23
ENSG00000102401	ARMCX3	51566	armadillo repeat containing, X-linked 3 [Source:HGNC Symbol;Acc:HGNC:24065]	0.868475104202235	4.88815113191484e-24	7.42848567400843e-23
ENSG00000110958	PTGES3	10728	prostaglandin E synthase 3 (cytosolic) [Source:HGNC Symbol;Acc:HGNC:16049]	-1.08166970657745	4.96974497908059e-24	7.54667807891746e-23
ENSG00000006625	GGCT	79017	gamma-glutamylcyclotransferase [Source:HGNC Symbol;Acc:HGNC:21705]	-1.05361510109781	5.01570344531086e-24	7.61061730150241e-23
ENSG00000055332	EIF2AK2	5610	eukaryotic translation initiation factor 2-alpha kinase 2 [Source:HGNC Symbol;Acc:HGNC:9437]	0.896912360272338	5.74043005878596e-24	8.70360216741178e-23
ENSG00000125895	TMEM74B	55321	transmembrane protein 74B [Source:HGNC Symbol;Acc:HGNC:15893]	1.65878648911449	5.74892718353561e-24	8.70980103051607e-23
ENSG00000196419	XRCC6	2547	X-ray repair complementing defective repair in Chinese hamster cells 6 [Source:HGNC Symbol;Acc:HGNC:4055]	-1.02782911892919	5.94439795197925e-24	8.99904413327986e-23
ENSG00000096746	HNRNPH3	3189	heterogeneous nuclear ribonucleoprotein H3 (2H9) [Source:HGNC Symbol;Acc:HGNC:5043]	-0.848285705058501	6.66155139976805e-24	1.00769991924822e-22
ENSG00000101407	TTI1	9675	TELO2 interacting protein 1 [Source:HGNC Symbol;Acc:HGNC:29029]	-0.910281857155961	7.34186737334569e-24	1.10935703871565e-22
ENSG00000251095		NA		3.54164104049442	7.34480161287744e-24	1.10935703871565e-22
ENSG00000126602	TRAP1	10131	TNF receptor-associated protein 1 [Source:HGNC Symbol;Acc:HGNC:16264]	-0.889217702308787	7.48055568153746e-24	1.12899815160011e-22
ENSG00000176390	CRLF3	51379	cytokine receptor-like factor 3 [Source:HGNC Symbol;Acc:HGNC:17177]	-1.01070686943947	7.57347439108833e-24	1.14214931351405e-22
ENSG00000119929	CUTC	51076	cutC copper transporter [Source:HGNC Symbol;Acc:HGNC:24271]	-1.032332491137	8.58235709360883e-24	1.29331080657007e-22
ENSG00000197321	SVIL	6840	supervillin [Source:HGNC Symbol;Acc:HGNC:11480]	0.927249351241376	8.61692366922631e-24	1.297530061046e-22
ENSG00000136891	TEX10	54881	testis expressed 10 [Source:HGNC Symbol;Acc:HGNC:25988]	-0.903647401495646	8.67639633362217e-24	1.30549037294013e-22
ENSG00000170584	NUDCD2	134492	NudC domain containing 2 [Source:HGNC Symbol;Acc:HGNC:30535]	-1.06627318594444	8.90772677865438e-24	1.33927739907988e-22
ENSG00000217094	PPIAP31	NA	peptidylprolyl isomerase A (cyclophilin A) pseudogene 31 [Source:HGNC Symbol;Acc:HGNC:44962]	-1.04871941650592	9.65368336171444e-24	1.45032827752114e-22
ENSG00000184990	SIVA1	10572	SIVA1, apoptosis-inducing factor [Source:HGNC Symbol;Acc:HGNC:17712]	-1.07242469445838	1.00294977973176e-23	1.5056440614271e-22
ENSG00000105618	PRPF31	26121	pre-mRNA processing factor 31 [Source:HGNC Symbol;Acc:HGNC:15446]	-0.832479070248828	1.01366934570386e-23	1.52058098661545e-22
ENSG00000241322	CDRT1	374286	CMT1A duplicated region transcript 1 [Source:HGNC Symbol;Acc:HGNC:14379]	1.25473906581466	1.02769431538258e-23	1.54044984026543e-22
ENSG00000145476	CYP4V2	285440	cytochrome P450, family 4, subfamily V, polypeptide 2 [Source:HGNC Symbol;Acc:HGNC:23198]	1.30989748016554	1.20490351462692e-23	1.80470612850412e-22
ENSG00000146842	TMEM209	84928	transmembrane protein 209 [Source:HGNC Symbol;Acc:HGNC:21898]	-0.965258014178299	1.29418063613764e-23	1.93695701875267e-22
ENSG00000105135	ILVBL	10994	ilvB (bacterial acetolactate synthase)-like [Source:HGNC Symbol;Acc:HGNC:6041]	-0.973723357140973	1.30458224906774e-23	1.95104670042258e-22
ENSG00000099800	TIMM13	26517	translocase of inner mitochondrial membrane 13 homolog (yeast) [Source:HGNC Symbol;Acc:HGNC:11816]	-1.082441689234	1.33522578139464e-23	1.99536463973014e-22
ENSG00000231453	LINC01305	285084	long intergenic non-protein coding RNA 1305 [Source:HGNC Symbol;Acc:HGNC:27690]	2.08745554447068	1.41808483100441e-23	2.1175875979836e-22
ENSG00000137337	MDC1	9656	mediator of DNA-damage checkpoint 1 [Source:HGNC Symbol;Acc:HGNC:21163]	-1.12469730274387	1.42549596885059e-23	2.12704670397374e-22
ENSG00000141338	ABCA8	10351	ATP-binding cassette, sub-family A (ABC1), member 8 [Source:HGNC Symbol;Acc:HGNC:38]	2.42387495357331	1.45907132157528e-23	2.17550287011632e-22
ENSG00000137656	BUD13	84811	BUD13 homolog (S. cerevisiae) [Source:HGNC Symbol;Acc:HGNC:28199]	-1.21798857279348	1.49897470671516e-23	2.23331405021604e-22
ENSG00000152926	ZNF117	51351	zinc finger protein 117 [Source:HGNC Symbol;Acc:HGNC:12897]	1.775022441945	1.60539867386662e-23	2.39007205734054e-22
ENSG00000034677	RNF19A	25897	ring finger protein 19A, RBR E3 ubiquitin protein ligase [Source:HGNC Symbol;Acc:HGNC:13432]	0.838420146296005	1.63901082967644e-23	2.43827544812408e-22
ENSG00000262660		NA	Uncharacterized protein; cDNA FLJ60124, highly similar to Mitochondrial dicarboxylate carrier [Source:UniProtKB/TrEMBL;Acc:B4DLN1]	-1.15183415154756	1.78803838488037e-23	2.65797489328041e-22
ENSG00000167972	ABCA3	21	ATP-binding cassette, sub-family A (ABC1), member 3 [Source:HGNC Symbol;Acc:HGNC:33]	1.01045795397182	1.79608507626098e-23	2.66792908019639e-22
ENSG00000196189	SEMA4A	64218	sema domain, immunoglobulin domain (Ig), transmembrane domain (TM) and short cytoplasmic domain, (semaphorin) 4A [Source:HGNC Symbol;Acc:HGNC:10729]	3.38653631917247	1.82764377894049e-23	2.71276712973315e-22
ENSG00000065427	KARS	3735	lysyl-tRNA synthetase [Source:HGNC Symbol;Acc:HGNC:6215]	-0.902060508839225	1.86303345719619e-23	2.76321989342102e-22
ENSG00000163171	CDC42EP3	10602	CDC42 effector protein (Rho GTPase binding) 3 [Source:HGNC Symbol;Acc:HGNC:16943]	1.11687013688871	1.87715652088679e-23	2.78207833658211e-22
ENSG00000203995	ZYG11A	440590	zyg-11 family member A, cell cycle regulator [Source:HGNC Symbol;Acc:HGNC:32058]	-1.2184988858503	1.88087723531605e-23	2.78550304804376e-22
ENSG00000150687	PRSS23	11098	protease, serine, 23 [Source:HGNC Symbol;Acc:HGNC:14370]	1.03189085586679	1.92627599883283e-23	2.8505998975986e-22
ENSG00000175265	GOLGA8A	23015	golgin A8 family, member A [Source:HGNC Symbol;Acc:HGNC:31972]	1.2569897642258	2.05987951024283e-23	3.04603140751178e-22
ENSG00000114686	MRPL3	11222	mitochondrial ribosomal protein L3 [Source:HGNC Symbol;Acc:HGNC:10379]	-1.10367402044833	2.09453499495117e-23	3.09496135828387e-22
ENSG00000163026	C2orf44	80304	chromosome 2 open reading frame 44 [Source:HGNC Symbol;Acc:HGNC:26157]	-0.974479621615238	2.15423503547711e-23	3.18079726165065e-22
ENSG00000165868	HSPA12A	259217	heat shock 70kDa protein 12A [Source:HGNC Symbol;Acc:HGNC:19022]	0.847194109980346	2.16228080929497e-23	3.1902927310255e-22
ENSG00000184939	ZFP90	146198	ZFP90 zinc finger protein [Source:HGNC Symbol;Acc:HGNC:23329]	0.863887638938785	2.23591853666989e-23	3.2964781052575e-22
ENSG00000186603	HPDL	84842	4-hydroxyphenylpyruvate dioxygenase-like [Source:HGNC Symbol;Acc:HGNC:28242]	-3.39370387516019	2.27690158395137e-23	3.35439729250882e-22
ENSG00000163703	CRELD1	78987	cysteine-rich with EGF-like domains 1 [Source:HGNC Symbol;Acc:HGNC:14630]	1.24297047982069	2.38542921814909e-23	3.51166465229161e-22
ENSG00000187634	SAMD11	148398	sterile alpha motif domain containing 11 [Source:HGNC Symbol;Acc:HGNC:28706]	-1.33087118523634	2.4405251126875e-23	3.59009785005616e-22
ENSG00000186951	PPARA	5465	peroxisome proliferator-activated receptor alpha [Source:HGNC Symbol;Acc:HGNC:9232]	1.37422245541654	2.44267002570529e-23	3.59057954076144e-22
ENSG00000065978	YBX1	4904	Y box binding protein 1 [Source:HGNC Symbol;Acc:HGNC:8014]	-1.0476010808684	2.513894346071e-23	3.6925276357605e-22
ENSG00000113649	TCERG1	10915	transcription elongation regulator 1 [Source:HGNC Symbol;Acc:HGNC:15630]	-0.822822495787096	2.66689715898115e-23	3.91435514656995e-22
ENSG00000111348	ARHGDIB	397	Rho GDP dissociation inhibitor (GDI) beta [Source:HGNC Symbol;Acc:HGNC:679]	1.82600343662404	2.77642816135907e-23	4.07209463665996e-22
ENSG00000101132	PFDN4	5203	prefoldin subunit 4 [Source:HGNC Symbol;Acc:HGNC:8868]	-0.963484430884893	2.90823831048709e-23	4.26225193338152e-22
ENSG00000126261	UBA2	10054	ubiquitin-like modifier activating enzyme 2 [Source:HGNC Symbol;Acc:HGNC:30661]	-0.9557386651822	2.9818087193932e-23	4.36475408364652e-22
ENSG00000148835	TAF5	6877	TAF5 RNA polymerase II, TATA box binding protein (TBP)-associated factor, 100kDa [Source:HGNC Symbol;Acc:HGNC:11539]	-1.6674575812684	2.98259668603098e-23	4.36475408364652e-22
ENSG00000178202	KDELC2	143888	KDEL (Lys-Asp-Glu-Leu) containing 2 [Source:HGNC Symbol;Acc:HGNC:28496]	-1.00790207060723	3.04371398322444e-23	4.45029036968205e-22
ENSG00000108306	FBXL20	84961	F-box and leucine-rich repeat protein 20 [Source:HGNC Symbol;Acc:HGNC:24679]	0.91671059494618	3.04555202460525e-23	4.45029036968205e-22
ENSG00000092208	GEMIN2	8487	gem (nuclear organelle) associated protein 2 [Source:HGNC Symbol;Acc:HGNC:10884]	-1.22710091729512	3.08874801798916e-23	4.51007434171425e-22
ENSG00000262814	MRPL12	6182	mitochondrial ribosomal protein L12 [Source:HGNC Symbol;Acc:HGNC:10378]	-1.14260165147291	3.17555903563123e-23	4.63340799910861e-22
ENSG00000084710	EFR3B	22979	EFR3 homolog B (S. cerevisiae) [Source:HGNC Symbol;Acc:HGNC:29155]	1.44880571118841	3.28203898167902e-23	4.78523705697791e-22
ENSG00000214021	TTLL3	26140	tubulin tyrosine ligase-like family member 3 [Source:HGNC Symbol;Acc:HGNC:24483]	1.25992121099977	3.3588685265958e-23	4.89364355541494e-22
ENSG00000137171	KLC4	89953	kinesin light chain 4 [Source:HGNC Symbol;Acc:HGNC:21624]	1.21715538368088	3.36343901998033e-23	4.89669132488809e-22
ENSG00000120262	CCDC170	80129	coiled-coil domain containing 170 [Source:HGNC Symbol;Acc:HGNC:21177]	2.53236628080211	3.40375680083091e-23	4.95173927519995e-22
ENSG00000196576	PLXNB2	23654	plexin B2 [Source:HGNC Symbol;Acc:HGNC:9104]	1.0354292441745	3.57554128862225e-23	5.19782146416638e-22
ENSG00000250753		NA		2.35759027089784	3.75447234606085e-23	5.45392321093957e-22
ENSG00000165861	ZFYVE1	53349	zinc finger, FYVE domain containing 1 [Source:HGNC Symbol;Acc:HGNC:13180]	0.955270082473847	3.79771545542525e-23	5.51268674043948e-22
ENSG00000178773	CPNE7	27132	copine VII [Source:HGNC Symbol;Acc:HGNC:2320]	1.01078558667445	3.81421009266405e-23	5.53256494792004e-22
ENSG00000101361	NOP56	10528	NOP56 ribonucleoprotein [Source:HGNC Symbol;Acc:HGNC:15911]	-0.986654996826388	3.91866635816315e-23	5.67990994657895e-22
ENSG00000106305	AIMP2	7965	aminoacyl tRNA synthetase complex-interacting multifunctional protein 2 [Source:HGNC Symbol;Acc:HGNC:20609]	-0.919625724003877	4.09776707059733e-23	5.93515295063936e-22
ENSG00000130844	ZNF331	55422	zinc finger protein 331 [Source:HGNC Symbol;Acc:HGNC:15489]	-0.979590077189553	4.12577915433391e-23	5.97134747055098e-22
ENSG00000091483	FH	2271	fumarate hydratase [Source:HGNC Symbol;Acc:HGNC:3700]	-0.840760985828776	4.19726630481596e-23	6.0703655284e-22
ENSG00000095485	CWF19L1	55280	CWF19-like 1, cell cycle control (S. pombe) [Source:HGNC Symbol;Acc:HGNC:25613]	-0.984032905011068	4.24811527170675e-23	6.13941223905184e-22
ENSG00000182612	TSPAN10	83882	tetraspanin 10 [Source:HGNC Symbol;Acc:HGNC:29942]	2.18164873539805	4.48160650670123e-23	6.4721212095314e-22
ENSG00000173145	NOC3L	64318	nucleolar complex associated 3 homolog (S. cerevisiae) [Source:HGNC Symbol;Acc:HGNC:24034]	-0.849909926333494	4.50602127930907e-23	6.5026264714412e-22
ENSG00000169242	EFNA1	1942	ephrin-A1 [Source:HGNC Symbol;Acc:HGNC:3221]	1.4691948732639	4.55654986796915e-23	6.57074446654003e-22
ENSG00000004455	AK2	204	adenylate kinase 2 [Source:HGNC Symbol;Acc:HGNC:362]	-0.83988481503998	4.56814887767469e-23	6.58266588091474e-22
ENSG00000131203	IDO1	3620	indoleamine 2,3-dioxygenase 1 [Source:HGNC Symbol;Acc:HGNC:6059]	4.62659633118144	4.5722514278914e-23	6.58377545258181e-22
ENSG00000106479	ZNF862	643641	zinc finger protein 862 [Source:HGNC Symbol;Acc:HGNC:34519]	1.32619159791662	5.07082724256807e-23	7.29637749484157e-22
ENSG00000122694	GLIPR2	152007	GLI pathogenesis-related 2 [Source:HGNC Symbol;Acc:HGNC:18007]	1.80866018658481	5.08040811021143e-23	7.30484298583239e-22
ENSG00000173230	GOLGB1	2804	golgin B1 [Source:HGNC Symbol;Acc:HGNC:4429]	0.97105203660867	5.13668791840655e-23	7.38039320116653e-22
ENSG00000072954	TMEM38A	79041	transmembrane protein 38A [Source:HGNC Symbol;Acc:HGNC:28462]	2.05193955871428	5.22444572096019e-23	7.50102831855302e-22
ENSG00000141401	IMPA2	3613	inositol(myo)-1(or 4)-monophosphatase 2 [Source:HGNC Symbol;Acc:HGNC:6051]	-1.06663050926841	5.33673152201542e-23	7.65667886339409e-22
ENSG00000143493	INTS7	25896	integrator complex subunit 7 [Source:HGNC Symbol;Acc:HGNC:24484]	-0.838135261711034	5.49701767173036e-23	7.88092025563896e-22
ENSG00000171865	RNASEH1	246243	ribonuclease H1 [Source:HGNC Symbol;Acc:HGNC:18466]	-0.851594690211441	5.90025986972785e-23	8.45290311721127e-22
ENSG00000160271	RALGDS	5900	ral guanine nucleotide dissociation stimulator [Source:HGNC Symbol;Acc:HGNC:9842]	0.9312291258971	5.91584741475715e-23	8.46909286419872e-22
ENSG00000010295	IFFO1	25900	intermediate filament family orphan 1 [Source:HGNC Symbol;Acc:HGNC:24970]	2.74111261881197	6.07017595605907e-23	8.68373614684309e-22
ENSG00000112379	ARFGEF3	57221	ARFGEF family member 3 [Source:HGNC Symbol;Acc:HGNC:21213]	0.85662514851592	6.24600448578786e-23	8.92880351817836e-22
ENSG00000065923	SLC9A7	84679	solute carrier family 9, subfamily A (NHE7, cation proton antiporter 7), member 7 [Source:HGNC Symbol;Acc:HGNC:17123]	0.888237785980624	6.31448663669272e-23	9.02017339078101e-22
ENSG00000165943	MOAP1	64112	modulator of apoptosis 1 [Source:HGNC Symbol;Acc:HGNC:16658]	0.97141637589174	6.73196247904608e-23	9.60958459075392e-22
ENSG00000181722	ZBTB20	26137	zinc finger and BTB domain containing 20 [Source:HGNC Symbol;Acc:HGNC:13503]	0.935190492727599	7.23531091009189e-23	1.03206355479982e-21
ENSG00000075826	SEC31B	25956	SEC31 homolog B (S. cerevisiae) [Source:HGNC Symbol;Acc:HGNC:23197]	1.68763901046814	7.40366463033307e-23	1.05531600603795e-21
ENSG00000160818	GPATCH4	54865	G patch domain containing 4 [Source:HGNC Symbol;Acc:HGNC:25982]	-0.994458730763992	7.46275769341501e-23	1.06297217729709e-21
ENSG00000183527	PSMG1	8624	proteasome (prosome, macropain) assembly chaperone 1 [Source:HGNC Symbol;Acc:HGNC:3043]	-0.949691618353481	7.8890729784554e-23	1.1228856322937e-21
ENSG00000122565	CBX3	11335	chromobox homolog 3 [Source:HGNC Symbol;Acc:HGNC:1553]	-0.937444017322875	7.95974590773648e-23	1.13212915877064e-21
ENSG00000100216	TOMM22	56993	translocase of outer mitochondrial membrane 22 homolog (yeast) [Source:HGNC Symbol;Acc:HGNC:18002]	-1.14276880522673	8.37175200674918e-23	1.18987289672904e-21
ENSG00000142192	APP	351	amyloid beta (A4) precursor protein [Source:HGNC Symbol;Acc:HGNC:620]	1.13623969342639	8.48479585840864e-23	1.20507280358534e-21
ENSG00000196642	RABL6	55684	RAB, member RAS oncogene family-like 6 [Source:HGNC Symbol;Acc:HGNC:24703]	-0.860314309135002	8.57952960501985e-23	1.21765220457451e-21
ENSG00000060656	PTPRU	10076	protein tyrosine phosphatase, receptor type, U [Source:HGNC Symbol;Acc:HGNC:9683]	1.31367482471323	8.82762507539793e-23	1.25196382619929e-21
ENSG00000277877		NA	Uncharacterized protein [Source:UniProtKB/TrEMBL;Acc:A0A087WZF3]	-0.888600582502889	9.39069875089113e-23	1.33086545568583e-21
ENSG00000095209	TMEM38B	55151	transmembrane protein 38B [Source:HGNC Symbol;Acc:HGNC:25535]	-1.04342680484617	9.60094449082019e-23	1.3596864470297e-21
ENSG00000137210	TMEM14B	81853	transmembrane protein 14B [Source:HGNC Symbol;Acc:HGNC:21384]	-0.984668372205811	9.69571298605577e-23	1.37212396670858e-21
ENSG00000167635	ZNF146	7705	zinc finger protein 146 [Source:HGNC Symbol;Acc:HGNC:12931]	-0.968413921875268	1.0003878579875e-22	1.41472172672878e-21
ENSG00000104626	ERI1	90459	exoribonuclease 1 [Source:HGNC Symbol;Acc:HGNC:23994]	-0.910213568673972	1.01273486321123e-22	1.43115807994285e-21
ENSG00000173674	EIF1AX	1964	eukaryotic translation initiation factor 1A, X-linked [Source:HGNC Symbol;Acc:HGNC:3250]	-0.913772922173429	1.02848131494873e-22	1.45237146948729e-21
ENSG00000075856	SART3	9733	squamous cell carcinoma antigen recognized by T cells 3 [Source:HGNC Symbol;Acc:HGNC:16860]	-0.828274541571706	1.04999027196027e-22	1.48168627234622e-21
ENSG00000184162	NR2C2AP	126382	nuclear receptor 2C2-associated protein [Source:HGNC Symbol;Acc:HGNC:30763]	-1.30997529096914	1.08663743932489e-22	1.53230615640989e-21
ENSG00000163655	GMPS	8833	guanine monphosphate synthase [Source:HGNC Symbol;Acc:HGNC:4378]	-0.882679507684206	1.10174109131739e-22	1.55249621969089e-21
ENSG00000130303	BST2	684	bone marrow stromal cell antigen 2 [Source:HGNC Symbol;Acc:HGNC:1119]	3.59460281568517	1.21712632518152e-22	1.71386654884435e-21
ENSG00000103257	SLC7A5	8140	solute carrier family 7 (amino acid transporter light chain, L system), member 5 [Source:HGNC Symbol;Acc:HGNC:11063]	-1.21937075744342	1.23551611817114e-22	1.73852253779124e-21
ENSG00000005022	SLC25A5	292	solute carrier family 25 (mitochondrial carrier; adenine nucleotide translocator), member 5 [Source:HGNC Symbol;Acc:HGNC:10991]	-0.979794600532398	1.30529932517203e-22	1.83540878776503e-21
ENSG00000139625	MAP3K12	7786	mitogen-activated protein kinase kinase kinase 12 [Source:HGNC Symbol;Acc:HGNC:6851]	0.984753094875582	1.35381675727552e-22	1.90227623447619e-21
ENSG00000136114	THSD1	55901	thrombospondin, type I, domain containing 1 [Source:HGNC Symbol;Acc:HGNC:17754]	1.37176278471924	1.36803472120403e-22	1.92088798522436e-21
ENSG00000173588	CEP83	51134	centrosomal protein 83kDa [Source:HGNC Symbol;Acc:HGNC:17966]	-0.946731591728525	1.38372046586826e-22	1.9415327786714e-21
ENSG00000198948	MFAP3L	9848	microfibrillar-associated protein 3-like [Source:HGNC Symbol;Acc:HGNC:29083]	1.06482925111126	1.42104589617953e-22	1.99248990240757e-21
ENSG00000167202	TBC1D2B	23102	TBC1 domain family, member 2B [Source:HGNC Symbol;Acc:HGNC:29183]	0.933400340539119	1.43138660531985e-22	2.0055655159361e-21
ENSG00000135698	MPHOSPH6	10200	M-phase phosphoprotein 6 [Source:HGNC Symbol;Acc:HGNC:7214]	-1.14382503101584	1.50626269673495e-22	2.10898127829169e-21
ENSG00000042088	TDP1	55775	tyrosyl-DNA phosphodiesterase 1 [Source:HGNC Symbol;Acc:HGNC:18884]	-1.12653494007357	1.52157199700952e-22	2.12890767513598e-21
ENSG00000115414	FN1	2335	fibronectin 1 [Source:HGNC Symbol;Acc:HGNC:3778]	2.0902579474017	1.54145856380834e-22	2.15520561830131e-21
ENSG00000254995	STX16-NPEPL1	NA	STX16-NPEPL1 readthrough (NMD candidate) [Source:HGNC Symbol;Acc:HGNC:41993]	0.811690787372948	1.54398910886555e-22	2.15721703216038e-21
ENSG00000120438	TCP1	6950	t-complex 1 [Source:HGNC Symbol;Acc:HGNC:11655]	-0.978957343723403	1.54608837875059e-22	2.1586234636464e-21
ENSG00000136295	TTYH3	80727	tweety family member 3 [Source:HGNC Symbol;Acc:HGNC:22222]	0.844169045873876	1.59363883079518e-22	2.22344129528175e-21
ENSG00000166046	TCP11L2	255394	t-complex 11, testis-specific-like 2 [Source:HGNC Symbol;Acc:HGNC:28627]	1.37777595960292	1.65196366171801e-22	2.30318942137622e-21
ENSG00000087087	SRRT	51593	serrate, RNA effector molecule [Source:HGNC Symbol;Acc:HGNC:24101]	-0.894372200202952	1.70451079965097e-22	2.37477541311033e-21
ENSG00000137216	TMEM63B	55362	transmembrane protein 63B [Source:HGNC Symbol;Acc:HGNC:17735]	1.00575467469777	1.73100897834298e-22	2.40999389542946e-21
ENSG00000029993	HMGB3	3149	high mobility group box 3 [Source:HGNC Symbol;Acc:HGNC:5004]	-0.842692704420337	1.76552876172677e-22	2.45632297300522e-21
ENSG00000169129	AFAP1L2	84632	actin filament associated protein 1-like 2 [Source:HGNC Symbol;Acc:HGNC:25901]	1.00670246433755	1.80441338222256e-22	2.50865522724764e-21
ENSG00000276850		NA		1.01458940083589	1.80730564235975e-22	2.51090930172006e-21
ENSG00000105825	TFPI2	7980	tissue factor pathway inhibitor 2 [Source:HGNC Symbol;Acc:HGNC:11761]	1.13992558333934	1.86446347359025e-22	2.58849897289171e-21
ENSG00000100567	PSMA3	5684	proteasome (prosome, macropain) subunit, alpha type, 3 [Source:HGNC Symbol;Acc:HGNC:9532]	-0.856917379381656	1.86912143923783e-22	2.59314347988642e-21
ENSG00000135205	CCDC146	57639	coiled-coil domain containing 146 [Source:HGNC Symbol;Acc:HGNC:29296]	1.91884160884343	1.9170150650011e-22	2.65772278064293e-21
ENSG00000169435	RASSF6	166824	Ras association (RalGDS/AF-6) domain family member 6 [Source:HGNC Symbol;Acc:HGNC:20796]	1.24179889355007	1.97124709638068e-22	2.73005771668896e-21
ENSG00000234171	RNASEH1-AS1	100506054	RNASEH1 antisense RNA 1 [Source:HGNC Symbol;Acc:HGNC:49289]	-1.41322043322532	1.97195401990036e-22	2.73005771668896e-21
ENSG00000035862	TIMP2	7077	TIMP metallopeptidase inhibitor 2 [Source:HGNC Symbol;Acc:HGNC:11821]	0.957438807484946	1.97361718396024e-22	2.73044685478421e-21
ENSG00000151465	CDC123	8872	cell division cycle 123 [Source:HGNC Symbol;Acc:HGNC:16827]	-0.854373856181339	1.98945982858062e-22	2.75043865454434e-21
ENSG00000128512	DOCK4	9732	dedicator of cytokinesis 4 [Source:HGNC Symbol;Acc:HGNC:19192]	1.05648647804769	2.0513764246247e-22	2.83405542971228e-21
ENSG00000167005	NUDT21	11051	nudix (nucleoside diphosphate linked moiety X)-type motif 21 [Source:HGNC Symbol;Acc:HGNC:13870]	-0.847356215859669	2.06208839596597e-22	2.84686361640137e-21
ENSG00000144036	EXOC6B	23233	exocyst complex component 6B [Source:HGNC Symbol;Acc:HGNC:17085]	0.778051114402824	2.13830891761516e-22	2.95003009611768e-21
ENSG00000265817	FSBP	100861412	fibrinogen silencer binding protein [Source:HGNC Symbol;Acc:HGNC:43653]	-0.937162875581808	2.28214932895011e-22	3.14627649286381e-21
ENSG00000122566	HNRNPA2B1	3181	heterogeneous nuclear ribonucleoprotein A2/B1 [Source:HGNC Symbol;Acc:HGNC:5033]	-1.14769683813952	2.36555470919525e-22	3.25898876114793e-21
ENSG00000102359	SRPX2	27286	sushi-repeat containing protein, X-linked 2 [Source:HGNC Symbol;Acc:HGNC:30668]	1.4140859161867	2.45591066589764e-22	3.38111296971943e-21
ENSG00000131944	FAAP24	91442	Fanconi anemia core complex associated protein 24 [Source:HGNC Symbol;Acc:HGNC:28467]	-1.32386898552129	2.52869587227982e-22	3.47889384768525e-21
ENSG00000102054	RBBP7	5931	retinoblastoma binding protein 7 [Source:HGNC Symbol;Acc:HGNC:9890]	-0.855820057805861	2.60282408306555e-22	3.57838500939756e-21
ENSG00000124562	SNRPC	6631	small nuclear ribonucleoprotein polypeptide C [Source:HGNC Symbol;Acc:HGNC:11157]	-0.961215303782781	2.61605328379608e-22	3.59407153509564e-21
ENSG00000111981	ULBP1	80329	UL16 binding protein 1 [Source:HGNC Symbol;Acc:HGNC:14893]	-1.69163433509963	2.63937693819953e-22	3.62359491251354e-21
ENSG00000215788	TNFRSF25	8718	tumor necrosis factor receptor superfamily, member 25 [Source:HGNC Symbol;Acc:HGNC:11910]	2.21667137045391	2.6711080448263e-22	3.6646118426103e-21
ENSG00000204525	HLA-C	3107	major histocompatibility complex, class I, C [Source:HGNC Symbol;Acc:HGNC:4933]	1.11806627254605	2.71229560403755e-22	3.71853656858889e-21
ENSG00000064042	LIMCH1	22998	LIM and calponin homology domains 1 [Source:HGNC Symbol;Acc:HGNC:29191]	0.84908079412782	2.77193566391161e-22	3.79766719668778e-21
ENSG00000258315	C17orf49	124944	chromosome 17 open reading frame 49 [Source:HGNC Symbol;Acc:HGNC:28737]	-1.09199412707132	2.83774338248255e-22	3.88513224284999e-21
ENSG00000151320	AKAP6	9472	A kinase (PRKA) anchor protein 6 [Source:HGNC Symbol;Acc:HGNC:376]	1.38928349308838	3.0452378527815e-22	4.16632403182489e-21
ENSG00000259976		NA		1.24563149432644	3.17669138809376e-22	4.34316367219241e-21
ENSG00000263272		NA		-1.332155895681	3.31729708053739e-22	4.53226287158345e-21
ENSG00000100101		NA	Uncharacterized protein [Source:UniProtKB/TrEMBL;Acc:V9GYY5]	-1.31399302452367	3.3791840860187e-22	4.61362548744889e-21
ENSG00000136048	DRAM1	55332	DNA-damage regulated autophagy modulator 1 [Source:HGNC Symbol;Acc:HGNC:25645]	1.12339017059631	3.39552902279776e-22	4.63273973580059e-21
ENSG00000104611	SH2D4A	63898	SH2 domain containing 4A [Source:HGNC Symbol;Acc:HGNC:26102]	-0.825909738859544	3.47419570121814e-22	4.73679850057043e-21
ENSG00000136450	SRSF1	6426	serine/arginine-rich splicing factor 1 [Source:HGNC Symbol;Acc:HGNC:10780]	-0.973669134743518	3.56202949239686e-22	4.85320376908912e-21
ENSG00000088247	KHSRP	8570	KH-type splicing regulatory protein [Source:HGNC Symbol;Acc:HGNC:6316]	-0.919990395694258	3.6149845817463e-22	4.92195971033632e-21
ENSG00000130304	SLC27A1	376497	solute carrier family 27 (fatty acid transporter), member 1 [Source:HGNC Symbol;Acc:HGNC:10995]	1.50743360200578	3.68400386390045e-22	5.01247798451909e-21
ENSG00000266086		NA	Uncharacterized protein [Source:UniProtKB/TrEMBL;Acc:J3QKU1]	-0.795037452617936	3.7658141280445e-22	5.12026317368528e-21
ENSG00000109099	PMP22	5376	peripheral myelin protein 22 [Source:HGNC Symbol;Acc:HGNC:9118]	-0.837603647839364	3.81761815344589e-22	5.18712959006032e-21
ENSG00000255872		NA		-0.871476988678917	3.89439463455453e-22	5.28781171135803e-21
ENSG00000156469	MTERF3	51001	mitochondrial transcription termination factor 3 [Source:HGNC Symbol;Acc:HGNC:24258]	-0.968726611353337	3.91565088127703e-22	5.31302189632617e-21
ENSG00000161714	PLCD3	113026	phospholipase C, delta 3 [Source:HGNC Symbol;Acc:HGNC:9061]	0.868910828382158	3.95878795986687e-22	5.36786650206795e-21
ENSG00000175334	BANF1	8815	barrier to autointegration factor 1 [Source:HGNC Symbol;Acc:HGNC:17397]	-1.00094961368568	3.9680022099675e-22	5.37667020988464e-21
ENSG00000189431	RASSF10	644943	Ras association (RalGDS/AF-6) domain family (N-terminal) member 10 [Source:HGNC Symbol;Acc:HGNC:33984]	1.29886739849215	4.10139289632953e-22	5.55360644687362e-21
ENSG00000221890	NPTXR	23467	neuronal pentraxin receptor [Source:HGNC Symbol;Acc:HGNC:7954]	1.32189464046849	4.30143066393698e-22	5.81814025192678e-21
ENSG00000147274	RBMX	27316	RNA binding motif protein, X-linked [Source:HGNC Symbol;Acc:HGNC:9910]	-0.899085957334851	4.3026437072611e-22	5.81814025192678e-21
ENSG00000066583	ISOC1	51015	isochorismatase domain containing 1 [Source:HGNC Symbol;Acc:HGNC:24254]	-1.15178227285433	4.44608157393164e-22	6.00798820619655e-21
ENSG00000263647		NA		1.67560902234661	4.52315028608281e-22	6.10795331865018e-21
ENSG00000163297	ANTXR2	118429	anthrax toxin receptor 2 [Source:HGNC Symbol;Acc:HGNC:21732]	1.43657465882338	4.58841932265844e-22	6.19185875262569e-21
ENSG00000132003	ZSWIM4	65249	zinc finger, SWIM-type containing 4 [Source:HGNC Symbol;Acc:HGNC:25704]	1.46590048514668	4.59922299715984e-22	6.2022013332348e-21
ENSG00000124222	STX16	8675	syntaxin 16 [Source:HGNC Symbol;Acc:HGNC:11431]	0.853257546691168	4.65580271916536e-22	6.27421818007032e-21
ENSG00000138685	FGF2	2247	fibroblast growth factor 2 (basic) [Source:HGNC Symbol;Acc:HGNC:3676]	0.970764580587874	4.66267169245385e-22	6.27919168071699e-21
ENSG00000196208	GREB1	9687	growth regulation by estrogen in breast cancer 1 [Source:HGNC Symbol;Acc:HGNC:24885]	1.22373651608923	4.73068419713241e-22	6.3627518239382e-21
ENSG00000137770	CTDSPL2	51496	CTD (carboxy-terminal domain, RNA polymerase II, polypeptide A) small phosphatase like 2 [Source:HGNC Symbol;Acc:HGNC:26936]	-0.856810638246433	4.73116138356207e-22	6.3627518239382e-21
ENSG00000001617	SEMA3F	6405	sema domain, immunoglobulin domain (Ig), short basic domain, secreted, (semaphorin) 3F [Source:HGNC Symbol;Acc:HGNC:10728]	1.32990443001972	4.74621321526483e-22	6.37865226399809e-21
ENSG00000185100	ADSSL1	122622	adenylosuccinate synthase like 1 [Source:HGNC Symbol;Acc:HGNC:20093]	1.41945245493577	4.78133872385162e-22	6.42149067494307e-21
ENSG00000114491	UMPS	7372	uridine monophosphate synthetase [Source:HGNC Symbol;Acc:HGNC:12563]	-0.895579992092236	5.15608696595126e-22	6.92008519696557e-21
ENSG00000137547	MRPL15	29088	mitochondrial ribosomal protein L15 [Source:HGNC Symbol;Acc:HGNC:14054]	-0.906479106390268	5.17930024353277e-22	6.94652108698123e-21
ENSG00000037897	METTL1	4234	methyltransferase like 1 [Source:HGNC Symbol;Acc:HGNC:7030]	-0.998199106730651	5.20110908955986e-22	6.97103874988769e-21
ENSG00000106554	CHCHD3	54927	coiled-coil-helix-coiled-coil-helix domain containing 3 [Source:HGNC Symbol;Acc:HGNC:21906]	-0.916434359997581	5.2378482899571e-22	7.01552073331474e-21
ENSG00000143314	MRPL24	79590	mitochondrial ribosomal protein L24 [Source:HGNC Symbol;Acc:HGNC:14037]	-0.851254444083137	5.46416248733738e-22	7.31368523711635e-21
ENSG00000175193	PARL	55486	presenilin associated, rhomboid-like [Source:HGNC Symbol;Acc:HGNC:18253]	-1.06550566510531	5.62329028138213e-22	7.52157906560497e-21
ENSG00000116199	FAM20B	9917	family with sequence similarity 20, member B [Source:HGNC Symbol;Acc:HGNC:23017]	-0.878186636859908	6.20777154402681e-22	8.29774929795627e-21
ENSG00000142303	ADAMTS10	81794	ADAM metallopeptidase with thrombospondin type 1 motif, 10 [Source:HGNC Symbol;Acc:HGNC:13201]	1.43840561203321	6.2235082553479e-22	8.31315950592651e-21
ENSG00000125944	HNRNPR	10236	heterogeneous nuclear ribonucleoprotein R [Source:HGNC Symbol;Acc:HGNC:5047]	-0.878601131875765	6.5044393702591e-22	8.68254758100262e-21
ENSG00000183091	NEB	4703	nebulin [Source:HGNC Symbol;Acc:HGNC:7720]	2.35219544766295	6.59618070604142e-22	8.79906455290711e-21
ENSG00000033030	ZCCHC8	55596	zinc finger, CCHC domain containing 8 [Source:HGNC Symbol;Acc:HGNC:25265]	-0.814976679580712	6.79473269308538e-22	9.05780965483095e-21
ENSG00000112759	SLC29A1	2030	solute carrier family 29 (equilibrative nucleoside transporter), member 1 [Source:HGNC Symbol;Acc:HGNC:11003]	-0.890933642126446	6.98504388972275e-22	9.30522771984913e-21
ENSG00000111801	BTN3A3	10384	butyrophilin, subfamily 3, member A3 [Source:HGNC Symbol;Acc:HGNC:1140]	1.55016925786578	7.2388671954861e-22	9.63686390256222e-21
ENSG00000101846	STS	412	steroid sulfatase (microsomal), isozyme S [Source:HGNC Symbol;Acc:HGNC:11425]	1.20170218242971	7.60986448906741e-22	1.01239382387889e-20
ENSG00000175279	APITD1	378708	apoptosis-inducing, TAF9-like domain 1 [Source:HGNC Symbol;Acc:HGNC:23163]	-1.29205338479854	7.98358235033806e-22	1.06139739510955e-20
ENSG00000136531	SCN2A	6326	sodium channel, voltage gated, type II alpha subunit [Source:HGNC Symbol;Acc:HGNC:10588]	3.01749842986496	8.05711582748406e-22	1.07045312903682e-20
ENSG00000143924	EML4	27436	echinoderm microtubule associated protein like 4 [Source:HGNC Symbol;Acc:HGNC:1316]	-1.00679600626666	8.28732787703615e-22	1.10029872001832e-20
ENSG00000188529	SRSF10	10772	serine/arginine-rich splicing factor 10 [Source:HGNC Symbol;Acc:HGNC:16713]	-0.8292151554499	8.85610134863157e-22	1.1750244341408e-20
ENSG00000084764	MAPRE3	22924	microtubule-associated protein, RP/EB family, member 3 [Source:HGNC Symbol;Acc:HGNC:6892]	1.20964380632599	9.04425278544796e-22	1.19918293979403e-20
ENSG00000186481	ANKRD20A5P	NA	ankyrin repeat domain 20 family, member A5, pseudogene [Source:HGNC Symbol;Acc:HGNC:33833]	1.38949123378037	9.32067817091829e-22	1.23500548587969e-20
ENSG00000182963	GJC1	10052	gap junction protein, gamma 1, 45kDa [Source:HGNC Symbol;Acc:HGNC:4280]	-1.06871292531831	9.44563733181373e-22	1.25072393516965e-20
ENSG00000164331	ANKRA2	57763	ankyrin repeat, family A (RFXANK-like), 2 [Source:HGNC Symbol;Acc:HGNC:13208]	1.1613922336367	9.68871122591144e-22	1.28205076342335e-20
ENSG00000110063	DCPS	28960	decapping enzyme, scavenger [Source:HGNC Symbol;Acc:HGNC:29812]	-1.36123247398521	1.02598827901845e-21	1.35672185008624e-20
ENSG00000105519	CAPS	828	calcyphosine [Source:HGNC Symbol;Acc:HGNC:1487]	1.99013536835001	1.04755846020338e-21	1.38431872506877e-20
ENSG00000118523	CTGF	1490	connective tissue growth factor [Source:HGNC Symbol;Acc:HGNC:2500]	1.48335251692785	1.05724719233882e-21	1.39618820400039e-20
ENSG00000248583		NA		3.07616209647586	1.07589761954405e-21	1.41986862870489e-20
ENSG00000175322	ZNF519	162655	zinc finger protein 519 [Source:HGNC Symbol;Acc:HGNC:30574]	-1.69407299772301	1.10779055565994e-21	1.46098199049518e-20
ENSG00000264230	ANXA8L1	643650,728113	annexin A8-like 1 [Source:HGNC Symbol;Acc:HGNC:23334]	1.00895699630414	1.12943164035812e-21	1.48852911854003e-20
ENSG00000273899	NOL12	79159	nucleolar protein 12 [Source:HGNC Symbol;Acc:HGNC:28585]	-1.16595827850763	1.19492871342902e-21	1.57380077750025e-20
ENSG00000119203	CPSF3	51692	cleavage and polyadenylation specific factor 3, 73kDa [Source:HGNC Symbol;Acc:HGNC:2326]	-0.790242724041962	1.19855100374231e-21	1.5775198953986e-20
ENSG00000177675	CD163L1	283316	CD163 molecule-like 1 [Source:HGNC Symbol;Acc:HGNC:30375]	1.95480829217783	1.24053462721789e-21	1.63169121806369e-20
ENSG00000163803	PLB1	151056	phospholipase B1 [Source:HGNC Symbol;Acc:HGNC:30041]	2.11640600753625	1.25255723893132e-21	1.64640857034779e-20
ENSG00000141101	NOB1	28987	NIN1/RPN12 binding protein 1 homolog (S. cerevisiae) [Source:HGNC Symbol;Acc:HGNC:29540]	-1.01076793385198	1.26563889265016e-21	1.66249747095721e-20
ENSG00000168955	TM4SF20	79853	transmembrane 4 L six family member 20 [Source:HGNC Symbol;Acc:HGNC:26230]	1.72122336354163	1.29157668355853e-21	1.69503444531637e-20
ENSG00000081721	DUSP12	11266	dual specificity phosphatase 12 [Source:HGNC Symbol;Acc:HGNC:3067]	-0.94700304146292	1.29212486062283e-21	1.69503444531637e-20
ENSG00000255639		NA	Uncharacterized protein [Source:UniProtKB/TrEMBL;Acc:H3BRM9]	-0.870956297300403	1.38439817960075e-21	1.81487527778317e-20
ENSG00000125445	MRPS7	51081	mitochondrial ribosomal protein S7 [Source:HGNC Symbol;Acc:HGNC:14499]	-0.921512907928173	1.4117676214829e-21	1.84952792639364e-20
ENSG00000004864	SLC25A13	10165	solute carrier family 25 (aspartate/glutamate carrier), member 13 [Source:HGNC Symbol;Acc:HGNC:10983]	-0.831890261297667	1.43168701187136e-21	1.87438095470713e-20
ENSG00000139180	NDUFA9	4704	NADH dehydrogenase (ubiquinone) 1 alpha subcomplex, 9, 39kDa [Source:HGNC Symbol;Acc:HGNC:7693]	-0.802289026330143	1.46521857718855e-21	1.91701047754549e-20
ENSG00000111615	KRR1	11103	KRR1, small subunit (SSU) processome component, homolog (yeast) [Source:HGNC Symbol;Acc:HGNC:5176]	-0.774563340987834	1.54274298853589e-21	2.01710327475282e-20
ENSG00000138668	HNRNPD	3184	heterogeneous nuclear ribonucleoprotein D (AU-rich element RNA binding protein 1, 37kDa) [Source:HGNC Symbol;Acc:HGNC:5036]	-0.946271419402609	1.57696282699286e-21	2.06048132341739e-20
ENSG00000164171	ITGA2	3673	integrin, alpha 2 (CD49B, alpha 2 subunit of VLA-2 receptor) [Source:HGNC Symbol;Acc:HGNC:6137]	1.08397035621432	1.60930582957238e-21	2.10135135287719e-20
ENSG00000139946	PELI2	57161	pellino E3 ubiquitin protein ligase family member 2 [Source:HGNC Symbol;Acc:HGNC:8828]	1.03576028763371	1.64330109466788e-21	2.14432340992461e-20
ENSG00000147224	PRPS1	5631	phosphoribosyl pyrophosphate synthetase 1 [Source:HGNC Symbol;Acc:HGNC:9462]	-0.905190961216905	1.71626761626358e-21	2.23805828560418e-20
ENSG00000120253	NUP43	348995	nucleoporin 43kDa [Source:HGNC Symbol;Acc:HGNC:21182]	-0.873553327076926	1.72741658733167e-21	2.25111095641983e-20
ENSG00000214367	HAUS3	79441	HAUS augmin-like complex, subunit 3 [Source:HGNC Symbol;Acc:HGNC:28719]	-0.945460047951063	1.82111799417362e-21	2.37165504897126e-20
ENSG00000068366	ACSL4	2182	acyl-CoA synthetase long-chain family member 4 [Source:HGNC Symbol;Acc:HGNC:3571]	0.924078576386082	1.99035786777849e-21	2.590349804732e-20
ENSG00000140307	GTF2A2	2958	general transcription factor IIA, 2, 12kDa [Source:HGNC Symbol;Acc:HGNC:4647]	-0.846170018927853	2.04141940371682e-21	2.65505475574915e-20
ENSG00000074695	LMAN1	3998	lectin, mannose-binding, 1 [Source:HGNC Symbol;Acc:HGNC:6631]	-0.82226724704004	2.04441358429947e-21	2.6571996560145e-20
ENSG00000005469	CROT	54677	carnitine O-octanoyltransferase [Source:HGNC Symbol;Acc:HGNC:2366]	0.86633234459619	2.04583623555147e-21	2.65730050424424e-20
ENSG00000139496	NUPL1	9818	nucleoporin like 1 [Source:HGNC Symbol;Acc:HGNC:20261]	-0.815783605640089	2.0992631725405e-21	2.72490428624902e-20
ENSG00000163513	TGFBR2	7048	transforming growth factor, beta receptor II (70/80kDa) [Source:HGNC Symbol;Acc:HGNC:11773]	0.955517969513354	2.21273638773099e-21	2.87030991963319e-20
ENSG00000099889	ARVCF	421	armadillo repeat gene deleted in velocardiofacial syndrome [Source:HGNC Symbol;Acc:HGNC:728]	1.53759748061574	2.22276083183158e-21	2.88142145627722e-20
ENSG00000204540	PSORS1C1	170679	psoriasis susceptibility 1 candidate 1 [Source:HGNC Symbol;Acc:HGNC:17202]	1.7551477451565	2.22768665116894e-21	2.88591327740941e-20
ENSG00000129351	ILF3	3609	interleukin enhancer binding factor 3, 90kDa [Source:HGNC Symbol;Acc:HGNC:6038]	-0.86334514948276	2.23155285882512e-21	2.88902741015394e-20
ENSG00000102974	CTCF	10664	CCCTC-binding factor (zinc finger protein) [Source:HGNC Symbol;Acc:HGNC:13723]	-0.830405966731221	2.35919472760625e-21	3.05227577200977e-20
ENSG00000265787	CYP4F35P	284233	cytochrome P450, family 4, subfamily F, polypeptide 35, pseudogene [Source:HGNC Symbol;Acc:HGNC:39954]	2.24176054578521	2.46742124387884e-21	3.19020772866952e-20
ENSG00000156453	PCDH1	5097	protocadherin 1 [Source:HGNC Symbol;Acc:HGNC:8655]	2.05797686647456	2.48429143134964e-21	3.20991900050644e-20
ENSG00000183647	ZNF530	348327	zinc finger protein 530 [Source:HGNC Symbol;Acc:HGNC:29297]	-1.27572671960576	2.52797359217741e-21	3.26422524752006e-20
ENSG00000106244	PDAP1	11333	PDGFA associated protein 1 [Source:HGNC Symbol;Acc:HGNC:14634]	-0.881819496713036	2.75721228778721e-21	3.55790241394671e-20
ENSG00000136699	SMPD4	55627	sphingomyelin phosphodiesterase 4, neutral membrane (neutral sphingomyelinase-3) [Source:HGNC Symbol;Acc:HGNC:32949]	-0.881805311470048	2.90878268705371e-21	3.75103856171235e-20
ENSG00000056558	TRAF1	7185	TNF receptor-associated factor 1 [Source:HGNC Symbol;Acc:HGNC:12031]	1.55627906953302	3.04482579820087e-21	3.9239124898406e-20
ENSG00000138764	CCNG2	901	cyclin G2 [Source:HGNC Symbol;Acc:HGNC:1593]	1.31550330760182	3.0935728411414e-21	3.9841346186173e-20
ENSG00000179023	KLHDC7A	127707	kelch domain containing 7A [Source:HGNC Symbol;Acc:HGNC:26791]	1.0481949972261	3.11472950072471e-21	4.00876847011839e-20
ENSG00000234537		NA		3.77242015897138	3.1527264764846e-21	4.05503022587433e-20
ENSG00000272921		NA	Uncharacterized protein [Source:UniProtKB/TrEMBL;Acc:H0YGX0]	-0.818032658142634	3.22396541000262e-21	4.14395970331892e-20
ENSG00000256646	PSMA2	NA	proteasome (prosome, macropain) subunit, alpha type, 2 [Source:HGNC Symbol;Acc:HGNC:9531]	-0.867710770833274	3.24199380250088e-21	4.16442324851803e-20
ENSG00000172172	MRPL13	28998	mitochondrial ribosomal protein L13 [Source:HGNC Symbol;Acc:HGNC:14278]	-0.929793734963441	3.33240130187192e-21	4.27777258738022e-20
ENSG00000164338	UTP15	84135	UTP15, U3 small nucleolar ribonucleoprotein, homolog (S. cerevisiae) [Source:HGNC Symbol;Acc:HGNC:25758]	-0.839249119867103	3.33619488621725e-21	4.27986143974727e-20
ENSG00000162377	COA7	65260	cytochrome c oxidase assembly factor 7 (putative) [Source:HGNC Symbol;Acc:HGNC:25716]	-1.07333268960471	3.40960086468465e-21	4.3711923869377e-20
ENSG00000162775	RBM15	64783	RNA binding motif protein 15 [Source:HGNC Symbol;Acc:HGNC:14959]	-0.807955370526299	3.42437092279589e-21	4.3872809306586e-20
ENSG00000115053	NCL	4691	nucleolin [Source:HGNC Symbol;Acc:HGNC:7667]	-1.1271495590761	3.56571257048331e-21	4.56540619199405e-20
ENSG00000196663	TECPR2	9895	tectonin beta-propeller repeat containing 2 [Source:HGNC Symbol;Acc:HGNC:19957]	0.913193644782119	3.57499900420607e-21	4.57433162740254e-20
ENSG00000124767	GLO1	2739	glyoxalase I [Source:HGNC Symbol;Acc:HGNC:4323]	-0.877026001656601	3.62653479632173e-21	4.63726999586616e-20
ENSG00000121058	COIL	8161	coilin [Source:HGNC Symbol;Acc:HGNC:2184]	-0.869696548787502	3.80349740052352e-21	4.86010805517336e-20
ENSG00000004139	SARM1	23098	sterile alpha and TIR motif containing 1 [Source:HGNC Symbol;Acc:HGNC:17074]	1.01493067405871	3.80572340623263e-21	4.86010805517336e-20
ENSG00000125864	BFSP1	631	beaded filament structural protein 1, filensin [Source:HGNC Symbol;Acc:HGNC:1040]	1.35117536211734	3.91423365184125e-21	4.99545219804753e-20
ENSG00000076242	MLH1	4292	mutL homolog 1 [Source:HGNC Symbol;Acc:HGNC:7127]	-0.798137421263977	4.13688560441646e-21	5.27619832155272e-20
ENSG00000077348	EXOSC5	56915	exosome component 5 [Source:HGNC Symbol;Acc:HGNC:24662]	-1.02583834294952	4.16522147791077e-21	5.30891067855518e-20
ENSG00000112299	VNN1	8876	vanin 1 [Source:HGNC Symbol;Acc:HGNC:12705]	3.77694449692868	4.25370776225032e-21	5.41819797234154e-20
ENSG00000112096	SOD2	6648,100129518	superoxide dismutase 2, mitochondrial [Source:HGNC Symbol;Acc:HGNC:11180]	1.18599315459488	4.34600804323494e-21	5.53219941379829e-20
ENSG00000171861	RNMTL1	55178	RNA methyltransferase like 1 [Source:HGNC Symbol;Acc:HGNC:18485]	-0.979683697677686	4.39538132082568e-21	5.5914458064541e-20
ENSG00000151150	ANK3	288	ankyrin 3, node of Ranvier (ankyrin G) [Source:HGNC Symbol;Acc:HGNC:494]	1.26747709096574	4.73169359884306e-21	6.01540146323961e-20
ENSG00000205085	FAM71F2	346653	family with sequence similarity 71, member F2 [Source:HGNC Symbol;Acc:HGNC:27998]	2.37017479804913	4.79441258352266e-21	6.09121639871856e-20
ENSG00000277785	SNORD116-21	NA	small nucleolar RNA, C/D box 116-21 [Source:HGNC Symbol;Acc:HGNC:33087]	1.59738743782373	4.84757860497551e-21	6.15480481490335e-20
ENSG00000101182	PSMA7	5688	proteasome (prosome, macropain) subunit, alpha type, 7 [Source:HGNC Symbol;Acc:HGNC:9536]	-0.880750902397928	4.97628450703552e-21	6.31416035459176e-20
ENSG00000137876	RSL24D1	51187	ribosomal L24 domain containing 1 [Source:HGNC Symbol;Acc:HGNC:18479]	-0.874385546865537	5.435374649134e-21	6.89225042158481e-20
ENSG00000135407	AVIL	10677	advillin [Source:HGNC Symbol;Acc:HGNC:14188]	2.69242564465916	5.52097013300742e-21	6.9962980081908e-20
ENSG00000167549	CORO6	84940	coronin 6 [Source:HGNC Symbol;Acc:HGNC:21356]	1.31890602276858	5.58093049410394e-21	7.06774761804599e-20
ENSG00000170537	TMC7	79905	transmembrane channel-like 7 [Source:HGNC Symbol;Acc:HGNC:23000]	1.05491972937442	5.97429253064772e-21	7.56105850323359e-20
ENSG00000196954	CASP4	837	caspase 4, apoptosis-related cysteine peptidase [Source:HGNC Symbol;Acc:HGNC:1505]	1.28893423206491	6.16280883814914e-21	7.79465117839144e-20
ENSG00000135446	CDK4	1019	cyclin-dependent kinase 4 [Source:HGNC Symbol;Acc:HGNC:1773]	-0.860296537223702	6.33338307173998e-21	8.00526653648721e-20
ENSG00000197696	NMB	4828	neuromedin B [Source:HGNC Symbol;Acc:HGNC:7842]	-1.61811047502124	6.8443636814253e-21	8.64560414899221e-20
ENSG00000243696		NA	Uncharacterized protein [Source:UniProtKB/TrEMBL;Acc:D6R8Y8]	1.73318632748416	7.01517189998019e-21	8.8557019844095e-20
ENSG00000051825	MPHOSPH9	10198	M-phase phosphoprotein 9 [Source:HGNC Symbol;Acc:HGNC:7215]	-0.815651886036528	7.08169770129919e-21	8.93397316646659e-20
ENSG00000188766	SPRED3	399473	sprouty-related, EVH1 domain containing 3 [Source:HGNC Symbol;Acc:HGNC:31041]	1.65958877837733	7.13518857611581e-21	8.99571062602067e-20
ENSG00000154065	ANKRD29	147463	ankyrin repeat domain 29 [Source:HGNC Symbol;Acc:HGNC:27110]	1.00909226069184	7.26546053170955e-21	9.15410958319222e-20
ENSG00000001497	LAS1L	81887	LAS1-like (S. cerevisiae) [Source:HGNC Symbol;Acc:HGNC:25726]	-0.824487864236494	7.28156392640396e-21	9.16855174824963e-20
ENSG00000173638	SLC19A1	6573	solute carrier family 19 (folate transporter), member 1 [Source:HGNC Symbol;Acc:HGNC:10937]	-1.10714672197019	7.28632231632781e-21	9.16869959753964e-20
ENSG00000170006	TMEM154	201799	transmembrane protein 154 [Source:HGNC Symbol;Acc:HGNC:26489]	2.40899297929764	7.33924348801255e-21	9.22941402604557e-20
ENSG00000133773	CCDC59	29080	coiled-coil domain containing 59 [Source:HGNC Symbol;Acc:HGNC:25005]	-0.966315518831095	7.58920445599366e-21	9.53767959494979e-20
ENSG00000105185	PDCD5	9141	programmed cell death 5 [Source:HGNC Symbol;Acc:HGNC:8764]	-0.891164887560756	7.72327737101846e-21	9.70000430653787e-20
ENSG00000168386	FILIP1L	11259	filamin A interacting protein 1-like [Source:HGNC Symbol;Acc:HGNC:24589]	3.82996138266757	7.81829939830834e-21	9.81310819015118e-20
ENSG00000147687	TATDN1	83940	TatD DNase domain containing 1 [Source:HGNC Symbol;Acc:HGNC:24220]	-1.06339021976167	8.55894934227743e-21	1.07359113146688e-19
ENSG00000101146	RAE1	8480	ribonucleic acid export 1 [Source:HGNC Symbol;Acc:HGNC:9828]	-0.8104988770503	8.68807125713026e-21	1.08909603906006e-19
ENSG00000108846	ABCC3	8714	ATP-binding cassette, sub-family C (CFTR/MRP), member 3 [Source:HGNC Symbol;Acc:HGNC:54]	1.33598997735556	8.73674642768499e-21	1.09450324936807e-19
ENSG00000088035	ALG6	29929	ALG6, alpha-1,3-glucosyltransferase [Source:HGNC Symbol;Acc:HGNC:23157]	-1.01304921475078	8.7734302390797e-21	1.09840233081913e-19
ENSG00000102098	SCML2	10389	sex comb on midleg-like 2 (Drosophila) [Source:HGNC Symbol;Acc:HGNC:10581]	-1.02944512954833	8.89694390942626e-21	1.11316037919332e-19
ENSG00000231298	LINC00704	100216001	long intergenic non-protein coding RNA 704 [Source:HGNC Symbol;Acc:HGNC:44678]	2.6800333173985	8.92345724101211e-21	1.11577102059136e-19
ENSG00000183098	GPC6	10082	glypican 6 [Source:HGNC Symbol;Acc:HGNC:4454]	1.13100224243366	9.13334881653167e-21	1.14129310069197e-19
ENSG00000163528	CHCHD4	131474	coiled-coil-helix-coiled-coil-helix domain containing 4 [Source:HGNC Symbol;Acc:HGNC:26467]	-1.14170301175436	9.15496767511908e-21	1.14327143735558e-19
ENSG00000109339	MAPK10	5602	mitogen-activated protein kinase 10 [Source:HGNC Symbol;Acc:HGNC:6872]	2.53024754540936	9.16917612965577e-21	1.1443224486259e-19
ENSG00000001084	GCLC	2729	glutamate-cysteine ligase, catalytic subunit [Source:HGNC Symbol;Acc:HGNC:4311]	-0.945845471789065	9.2045270250008e-21	1.1480090650626e-19
ENSG00000115268	RPS15	6209	ribosomal protein S15 [Source:HGNC Symbol;Acc:HGNC:10388]	-0.921601628530303	9.22721599313329e-21	1.15011280227345e-19
ENSG00000115415	STAT1	6772	signal transducer and activator of transcription 1, 91kDa [Source:HGNC Symbol;Acc:HGNC:11362]	0.952935511055917	9.30421996754182e-21	1.15897963227463e-19
ENSG00000172922	RNASEH2C	84153	ribonuclease H2, subunit C [Source:HGNC Symbol;Acc:HGNC:24116]	-1.03589067754084	9.31281015246708e-21	1.1593186979971e-19
ENSG00000088881	EBF4	57593	early B-cell factor 4 [Source:HGNC Symbol;Acc:HGNC:29278]	1.93631940678124	9.32905703966337e-21	1.16060989216366e-19
ENSG00000182378	PLCXD1	55344	phosphatidylinositol-specific phospholipase C, X domain containing 1 [Source:HGNC Symbol;Acc:HGNC:23148]	-0.796542478674005	9.37973807829697e-21	1.16618065119468e-19
ENSG00000280798	LINC00294	283267	long intergenic non-protein coding RNA 294 [Source:HGNC Symbol;Acc:HGNC:27456]	0.89197921639694	9.41408681413028e-21	1.16971508867898e-19
ENSG00000108826	MRPL27	51264	mitochondrial ribosomal protein L27 [Source:HGNC Symbol;Acc:HGNC:14483]	-0.822858306449871	9.52222779103183e-21	1.18240812218495e-19
ENSG00000101955	SRPX	8406	sushi-repeat containing protein, X-linked [Source:HGNC Symbol;Acc:HGNC:11309]	1.38917945776682	9.85341329980555e-21	1.22276402733014e-19
ENSG00000156795	WDYHV1	55093	WDYHV motif containing 1 [Source:HGNC Symbol;Acc:HGNC:25490]	-1.17184276829378	1.03842875441825e-20	1.28783417905128e-19
ENSG00000103485	QPRT	23475	quinolinate phosphoribosyltransferase [Source:HGNC Symbol;Acc:HGNC:9755]	2.00912901391885	1.03966017010749e-20	1.28855246679069e-19
ENSG00000115541	HSPE1	3336	heat shock 10kDa protein 1 [Source:HGNC Symbol;Acc:HGNC:5269]	-0.889867789834639	1.06905299232689e-20	1.32415115463386e-19
ENSG00000137699	TRIM29	23650	tripartite motif containing 29 [Source:HGNC Symbol;Acc:HGNC:17274]	2.36888196703506	1.07808498490154e-20	1.3345016893305e-19
ENSG00000132383	RPA1	6117	replication protein A1, 70kDa [Source:HGNC Symbol;Acc:HGNC:10289]	-0.964966515719175	1.08682554355579e-20	1.34447873753839e-19
ENSG00000128408	RIBC2	26150	RIB43A domain with coiled-coils 2 [Source:HGNC Symbol;Acc:HGNC:13241]	-2.17469541111439	1.08896649047409e-20	1.34628422939963e-19
ENSG00000132386	SERPINF1	5176	serpin peptidase inhibitor, clade F (alpha-2 antiplasmin, pigment epithelium derived factor), member 1 [Source:HGNC Symbol;Acc:HGNC:8824]	1.90479740642986	1.11896605799491e-20	1.38250740723874e-19
ENSG00000116299	KIAA1324	57535	KIAA1324 [Source:HGNC Symbol;Acc:HGNC:29618]	1.93801425864957	1.13412794054903e-20	1.40036447459292e-19
ENSG00000256966		NA	Uncharacterized protein [Source:UniProtKB/TrEMBL;Acc:H3BUX3]	-0.922574164730984	1.14183345329033e-20	1.40899823255488e-19
ENSG00000103550	KNOP1	400506	lysine-rich nucleolar protein 1 [Source:HGNC Symbol;Acc:HGNC:34404]	-0.880751464893276	1.15539977678637e-20	1.42484881337026e-19
ENSG00000188313	PLSCR1	5359	phospholipid scramblase 1 [Source:HGNC Symbol;Acc:HGNC:9092]	0.847172518583116	1.24938211646275e-20	1.53978746680213e-19
ENSG00000126561	STAT5A	6776	signal transducer and activator of transcription 5A [Source:HGNC Symbol;Acc:HGNC:11366]	1.37392299923279	1.26163651900102e-20	1.55392088961248e-19
ENSG00000146802	TMEM168	64418	transmembrane protein 168 [Source:HGNC Symbol;Acc:HGNC:25826]	-0.888601490590376	1.2978345899482e-20	1.5975090441755e-19
ENSG00000135596	MICAL1	64780	microtubule associated monooxygenase, calponin and LIM domain containing 1 [Source:HGNC Symbol;Acc:HGNC:20619]	1.16586328287673	1.30331457431399e-20	1.60325546264927e-19
ENSG00000224807	DUX4L9	NA	double homeobox 4 like 9 [Source:HGNC Symbol;Acc:HGNC:33855]	1.89047628235996	1.31320711060524e-20	1.61441939496684e-19
ENSG00000163975	MFI2	4241	antigen p97 (melanoma associated) identified by monoclonal antibodies 133.2 and 96.5 [Source:HGNC Symbol;Acc:HGNC:7037]	1.45507624940289	1.34930481920897e-20	1.65776529902316e-19
ENSG00000171202	TMEM126A	84233	transmembrane protein 126A [Source:HGNC Symbol;Acc:HGNC:25382]	-0.992832723721433	1.36101169163643e-20	1.67110919701487e-19
ENSG00000157168	NRG1	3084	neuregulin 1 [Source:HGNC Symbol;Acc:HGNC:7997]	0.883969065554634	1.40782028752866e-20	1.72750916772771e-19
ENSG00000205937	RNPS1	10921	RNA binding protein S1, serine-rich domain [Source:HGNC Symbol;Acc:HGNC:10080]	-0.800771690476342	1.46861186226945e-20	1.80098671328338e-19
ENSG00000176658	MYO1D	4642	myosin ID [Source:HGNC Symbol;Acc:HGNC:7598]	1.2741804856551	1.4820886007045e-20	1.81638600468475e-19
ENSG00000079387	SENP1	29843	SUMO1/sentrin specific peptidase 1 [Source:HGNC Symbol;Acc:HGNC:17927]	-0.850060336824088	1.50633804432795e-20	1.84496059539634e-19
ENSG00000078237	TIGAR	57103	TP53 induced glycolysis regulatory phosphatase [Source:HGNC Symbol;Acc:HGNC:1185]	0.799744407546869	1.52886430259103e-20	1.87139053048255e-19
ENSG00000165246	NLGN4Y	22829	neuroligin 4, Y-linked [Source:HGNC Symbol;Acc:HGNC:15529]	1.1214639157354	1.63706835807076e-20	2.00259581932174e-19
ENSG00000185627	PSMD13	5719	proteasome (prosome, macropain) 26S subunit, non-ATPase, 13 [Source:HGNC Symbol;Acc:HGNC:9558]	-0.819754967011968	1.73186010427587e-20	2.11724184530162e-19
ENSG00000104783	KCNN4	3783	potassium channel, calcium activated intermediate/small conductance subfamily N alpha, member 4 [Source:HGNC Symbol;Acc:HGNC:6293]	0.892250226431976	1.74350248649535e-20	2.1301567794188e-19
ENSG00000101347	SAMHD1	25939	SAM domain and HD domain 1 [Source:HGNC Symbol;Acc:HGNC:15925]	0.8231487365097	1.82497752775626e-20	2.22832237567075e-19
ENSG00000147041	SYTL5	94122	synaptotagmin-like 5 [Source:HGNC Symbol;Acc:HGNC:15589]	1.6799408317837	1.83316430152535e-20	2.23693600623439e-19
ENSG00000241935	HOGA1	112817	4-hydroxy-2-oxoglutarate aldolase 1 [Source:HGNC Symbol;Acc:HGNC:25155]	1.49739361673447	1.89231631527841e-20	2.30769142744693e-19
ENSG00000172493	AFF1	4299	AF4/FMR2 family, member 1 [Source:HGNC Symbol;Acc:HGNC:7135]	0.846954080045662	1.90415803671678e-20	2.32069994900534e-19
ENSG00000185101	ANO9	338440	anoctamin 9 [Source:HGNC Symbol;Acc:HGNC:20679]	2.18343593398959	1.9305902646463e-20	2.35146370335094e-19
ENSG00000106261	ZKSCAN1	7586	zinc finger with KRAB and SCAN domains 1 [Source:HGNC Symbol;Acc:HGNC:13101]	0.759669049562397	1.95281493440082e-20	2.37706788934212e-19
ENSG00000189046	ALKBH2	121642	alkB, alkylation repair homolog 2 (E. coli) [Source:HGNC Symbol;Acc:HGNC:32487]	-0.965416111143147	1.99790991589758e-20	2.43046233364979e-19
ENSG00000069275	NUCKS1	64710	nuclear casein kinase and cyclin-dependent kinase substrate 1 [Source:HGNC Symbol;Acc:HGNC:29923]	-1.03224572964385	2.01403361937991e-20	2.44856911904428e-19
ENSG00000263513	FAM72C	554282	family with sequence similarity 72, member C [Source:HGNC Symbol;Acc:HGNC:30602]	-2.53314985286713	2.16512495257758e-20	2.63064013303337e-19
ENSG00000079134	THOC1	9984	THO complex 1 [Source:HGNC Symbol;Acc:HGNC:19070]	-0.851971055755649	2.24067148288004e-20	2.72075635007855e-19
ENSG00000102575	ACP5	54	acid phosphatase 5, tartrate resistant [Source:HGNC Symbol;Acc:HGNC:124]	3.36216847285263	2.40946943619764e-20	2.92392372122362e-19
ENSG00000174705	SH3PXD2B	285590	SH3 and PX domains 2B [Source:HGNC Symbol;Acc:HGNC:29242]	0.844354282582204	2.46697116094217e-20	2.99039475579993e-19
ENSG00000088205	DDX18	8886	DEAD (Asp-Glu-Ala-Asp) box polypeptide 18 [Source:HGNC Symbol;Acc:HGNC:2741]	-0.822482955663654	2.4672724498653e-20	2.99039475579993e-19
ENSG00000134697	GNL2	29889	guanine nucleotide binding protein-like 2 (nucleolar) [Source:HGNC Symbol;Acc:HGNC:29925]	-0.781096330851965	2.48539003529028e-20	3.01050677726516e-19
ENSG00000236287	ZBED5	58486	zinc finger, BED-type containing 5 [Source:HGNC Symbol;Acc:HGNC:30803]	0.903035187723665	2.49433332746143e-20	3.0194883098853e-19
ENSG00000135632	SMYD5	10322	SMYD family member 5 [Source:HGNC Symbol;Acc:HGNC:16258]	-0.824330336637782	2.54870719387819e-20	3.08342065659874e-19
ENSG00000175792	RUVBL1	8607	RuvB-like AAA ATPase 1 [Source:HGNC Symbol;Acc:HGNC:10474]	-0.823778764141688	2.59809461635067e-20	3.14124585315936e-19
ENSG00000116285	ERRFI1	54206	ERBB receptor feedback inhibitor 1 [Source:HGNC Symbol;Acc:HGNC:18185]	-0.767030471475868	2.63210663216767e-20	3.18042193425716e-19
ENSG00000010810	FYN	2534	FYN proto-oncogene, Src family tyrosine kinase [Source:HGNC Symbol;Acc:HGNC:4037]	1.77812535222185	2.6663732216477e-20	3.21985754076234e-19
ENSG00000090273	NUDC	10726	nudC nuclear distribution protein [Source:HGNC Symbol;Acc:HGNC:8045]	-0.893605339168659	2.71763268935507e-20	3.27975268240066e-19
ENSG00000131876	SNRPA1	6627	small nuclear ribonucleoprotein polypeptide A' [Source:HGNC Symbol;Acc:HGNC:11152]	-0.872091928999455	2.72439363879364e-20	3.28590480634964e-19
ENSG00000133216	EPHB2	2048	EPH receptor B2 [Source:HGNC Symbol;Acc:HGNC:3393]	1.45688222227454	2.95940524058557e-20	3.56717571281321e-19
ENSG00000057704	TMCC3	57458	transmembrane and coiled-coil domain family 3 [Source:HGNC Symbol;Acc:HGNC:29199]	2.26690531619423	3.11455296670085e-20	3.75189685427695e-19
ENSG00000130520	LSM4	25804	LSM4 homolog, U6 small nuclear RNA associated (S. cerevisiae) [Source:HGNC Symbol;Acc:HGNC:17259]	-0.898502685759921	3.24765069378121e-20	3.90984686815e-19
ENSG00000088854	C20orf194	25943	chromosome 20 open reading frame 194 [Source:HGNC Symbol;Acc:HGNC:17721]	0.911720456309103	3.32753877380015e-20	4.00358441018245e-19
ENSG00000102174	PHEX	5251	phosphate regulating endopeptidase homolog, X-linked [Source:HGNC Symbol;Acc:HGNC:8918]	1.70121536294219	3.35433488808626e-20	4.03336823183397e-19
ENSG00000160469	BRSK1	84446	BR serine/threonine kinase 1 [Source:HGNC Symbol;Acc:HGNC:18994]	1.3485137601111	3.41890855899926e-20	4.10851322941541e-19
ENSG00000058668	ATP2B4	493	ATPase, Ca++ transporting, plasma membrane 4 [Source:HGNC Symbol;Acc:HGNC:817]	1.03137274754455	3.47080425125827e-20	4.16834095974823e-19
ENSG00000117877	CD3EAP	10849	CD3e molecule, epsilon associated protein [Source:HGNC Symbol;Acc:HGNC:24219]	-1.04722023597804	3.47650045356563e-20	4.17264538035495e-19
ENSG00000254685	FPGT	8790	fucose-1-phosphate guanylyltransferase [Source:HGNC Symbol;Acc:HGNC:3825]	-0.955611221245598	3.54407795472079e-20	4.25117207489155e-19
ENSG00000164877	MICALL2	79778	MICAL-like 2 [Source:HGNC Symbol;Acc:HGNC:29672]	1.28690139294793	3.57857111459345e-20	4.2899424114022e-19
ENSG00000132603	NIP7	51388	NIP7, nucleolar pre-rRNA processing protein [Source:HGNC Symbol;Acc:HGNC:24328]	-0.891386355612773	3.68255117886242e-20	4.41191516613742e-19
ENSG00000123700	KCNJ2	3759	potassium channel, inwardly rectifying subfamily J, member 2 [Source:HGNC Symbol;Acc:HGNC:6263]	1.5133656562494	3.68838647169708e-20	4.41622806877863e-19
ENSG00000124067	SLC12A4	6560	solute carrier family 12 (potassium/chloride transporter), member 4 [Source:HGNC Symbol;Acc:HGNC:10913]	0.950778488233093	3.83612485904246e-20	4.59033814144415e-19
ENSG00000129354	AP1M2	10053	adaptor-related protein complex 1, mu 2 subunit [Source:HGNC Symbol;Acc:HGNC:558]	-1.12885260266975	3.86737878614742e-20	4.6249355507947e-19
ENSG00000178764	ZHX2	22882	zinc fingers and homeoboxes 2 [Source:HGNC Symbol;Acc:HGNC:18513]	1.29910510096459	3.89437848206389e-20	4.65440661171532e-19
ENSG00000130766	SESN2	83667	sestrin 2 [Source:HGNC Symbol;Acc:HGNC:20746]	1.16938400940257	3.9032005163831e-20	4.66212995173304e-19
ENSG00000274845		NA	TUC338 [Source:RFAM;Acc:RF02271]	2.34383849349328	4.00533290659895e-20	4.78123002433649e-19
ENSG00000231721	LINC-PINT	378805	long intergenic non-protein coding RNA, p53 induced transcript [Source:HGNC Symbol;Acc:HGNC:26885]	1.07927122691356	4.08847328282163e-20	4.87752887532754e-19
ENSG00000153558	FBXL2	25827	F-box and leucine-rich repeat protein 2 [Source:HGNC Symbol;Acc:HGNC:13598]	1.12641610348513	4.21380147056997e-20	5.02401097480871e-19
ENSG00000161980	POLR3K	51728	polymerase (RNA) III (DNA directed) polypeptide K, 12.3 kDa [Source:HGNC Symbol;Acc:HGNC:14121]	-1.21591069120984	4.26510935896906e-20	5.08211703834697e-19
ENSG00000273184		NA		-0.86889667544339	4.35306804201693e-20	5.18379820603294e-19
ENSG00000166143	PPP1R14D	54866	protein phosphatase 1, regulatory (inhibitor) subunit 14D [Source:HGNC Symbol;Acc:HGNC:14953]	4.38365430422772	4.364308017765e-20	5.19405236138345e-19
ENSG00000055955	ITIH4	3700	inter-alpha-trypsin inhibitor heavy chain family, member 4 [Source:HGNC Symbol;Acc:HGNC:6169]	1.90967339093656	4.45186577545874e-20	5.2950668428635e-19
ENSG00000159147	DONSON	29980	downstream neighbor of SON [Source:HGNC Symbol;Acc:HGNC:2993]	-0.908657384612703	4.65632626093385e-20	5.53492067454929e-19
ENSG00000112039	FANCE	2178	Fanconi anemia, complementation group E [Source:HGNC Symbol;Acc:HGNC:3586]	-1.71170752092641	4.73507872008849e-20	5.62514823776717e-19
ENSG00000130066	SAT1	6303	spermidine/spermine N1-acetyltransferase 1 [Source:HGNC Symbol;Acc:HGNC:10540]	1.25629815093562	4.95880385589273e-20	5.88738755871495e-19
ENSG00000130726	TRIM28	10155	tripartite motif containing 28 [Source:HGNC Symbol;Acc:HGNC:16384]	-0.995145471864023	5.07382122652663e-20	6.02032505412974e-19
ENSG00000151247	EIF4E	1977	eukaryotic translation initiation factor 4E [Source:HGNC Symbol;Acc:HGNC:3287]	-0.843568743432778	5.12422021005875e-20	6.07647625869871e-19
ENSG00000204529	GUCY2EP	NA	guanylate cyclase 2E, pseudogene [Source:HGNC Symbol;Acc:HGNC:4690]	4.38971020622651	5.22648910297371e-20	6.19403231663759e-19
ENSG00000100311	PDGFB	5155	platelet-derived growth factor beta polypeptide [Source:HGNC Symbol;Acc:HGNC:8800]	1.89316262338039	5.26220702221792e-20	6.23262361696267e-19
ENSG00000179041	RRS1	23212	RRS1 ribosome biogenesis regulator homolog (S. cerevisiae) [Source:HGNC Symbol;Acc:HGNC:17083]	-1.00308388987815	5.28640775292919e-20	6.25753574397058e-19
ENSG00000164466	SFXN1	94081	sideroflexin 1 [Source:HGNC Symbol;Acc:HGNC:16085]	-0.800636528297725	5.39943324199698e-20	6.38749719334684e-19
ENSG00000173548	SNX33	257364	sorting nexin 33 [Source:HGNC Symbol;Acc:HGNC:28468]	0.822735008560553	5.68305171637779e-20	6.71899280124234e-19
ENSG00000117139	KDM5B	10765	lysine (K)-specific demethylase 5B [Source:HGNC Symbol;Acc:HGNC:18039]	0.769779930539443	5.70707410309428e-20	6.74335861128772e-19
ENSG00000141258	SGSM2	9905	small G protein signaling modulator 2 [Source:HGNC Symbol;Acc:HGNC:29026]	0.796931610512917	5.73285876511928e-20	6.76977631582167e-19
ENSG00000196116	TDRD7	23424	tudor domain containing 7 [Source:HGNC Symbol;Acc:HGNC:30831]	0.790434216441577	5.8926180326846e-20	6.95427490165573e-19
ENSG00000169299	PGM2	55276	phosphoglucomutase 2 [Source:HGNC Symbol;Acc:HGNC:8906]	-0.984201082043261	5.98296135641274e-20	7.05667967506209e-19
ENSG00000169139	UBE2V2	7336	ubiquitin-conjugating enzyme E2 variant 2 [Source:HGNC Symbol;Acc:HGNC:12495]	-0.830938422258872	6.10223490744756e-20	7.19306401142804e-19
ENSG00000167608	TMC4	147798	transmembrane channel-like 4 [Source:HGNC Symbol;Acc:HGNC:22998]	2.20051689331857	6.26730536790997e-20	7.37909647024243e-19
ENSG00000084636	COL16A1	1307	collagen, type XVI, alpha 1 [Source:HGNC Symbol;Acc:HGNC:2193]	1.40712365675815	6.26752575271654e-20	7.37909647024243e-19
ENSG00000101158	NELFCD	51497	negative elongation factor complex member C/D [Source:HGNC Symbol;Acc:HGNC:15934]	-0.812656714926547	6.38495134993052e-20	7.51287068905464e-19
ENSG00000129255	MPDU1	9526	mannose-P-dolichol utilization defect 1 [Source:HGNC Symbol;Acc:HGNC:7207]	-0.832988777868351	6.45552319226951e-20	7.59138786824265e-19
ENSG00000135245	HILPDA	29923	hypoxia inducible lipid droplet-associated [Source:HGNC Symbol;Acc:HGNC:28859]	-1.43790840319555	6.76843349566762e-20	7.95462059133906e-19
ENSG00000133943	C14orf159	80017	chromosome 14 open reading frame 159 [Source:HGNC Symbol;Acc:HGNC:20498]	0.928358181902877	6.83211058173841e-20	8.02468351086944e-19
ENSG00000162174	ASRGL1	80150	asparaginase like 1 [Source:HGNC Symbol;Acc:HGNC:16448]	-1.29018262648267	7.02910718238587e-20	8.25116111082681e-19
ENSG00000137692	DCUN1D5	84259	DCN1, defective in cullin neddylation 1, domain containing 5 [Source:HGNC Symbol;Acc:HGNC:28409]	-0.892814629685926	7.16300063374041e-20	8.40333969834771e-19
ENSG00000171219	CDC42BPG	55561	CDC42 binding protein kinase gamma (DMPK-like) [Source:HGNC Symbol;Acc:HGNC:29829]	1.46555005849126	7.18988201472987e-20	8.42986997525242e-19
ENSG00000184897	H1FX	8971	H1 histone family, member X [Source:HGNC Symbol;Acc:HGNC:4722]	-0.90765514209464	7.21011239234451e-20	8.44857535131424e-19
ENSG00000149557	FEZ1	9638	fasciculation and elongation protein zeta 1 (zygin I) [Source:HGNC Symbol;Acc:HGNC:3659]	2.73654372029605	7.30830542442037e-20	8.55855850414042e-19
ENSG00000205659	LIN52	91750	lin-52 DREAM MuvB core complex component [Source:HGNC Symbol;Acc:HGNC:19856]	-1.23890902031259	7.32473947904365e-20	8.57272234289019e-19
ENSG00000047644	WWC3	55841	WWC family member 3 [Source:HGNC Symbol;Acc:HGNC:29237]	0.781254786172085	7.43126844874238e-20	8.69225218906776e-19
ENSG00000163714	U2SURP	23350	U2 snRNP-associated SURP domain containing [Source:HGNC Symbol;Acc:HGNC:30855]	-0.798950960774309	7.59565768053525e-20	8.8792788838257e-19
ENSG00000169247	SH3TC2	79628	SH3 domain and tetratricopeptide repeats 2 [Source:HGNC Symbol;Acc:HGNC:29427]	1.84249508962419	8.03593702641528e-20	9.38840756320877e-19
ENSG00000168283	BMI1	648	BMI1 proto-oncogene, polycomb ring finger [Source:HGNC Symbol;Acc:HGNC:1066]	-0.81484980637047	8.08934996284022e-20	9.44522446015788e-19
ENSG00000236609	ZNF853	54753	zinc finger protein 853 [Source:HGNC Symbol;Acc:HGNC:21767]	1.43784162685195	8.1170099482841e-20	9.47192253622568e-19
ENSG00000107371	EXOSC3	51010	exosome component 3 [Source:HGNC Symbol;Acc:HGNC:17944]	-0.903466619770206	8.5472150014825e-20	9.96805074198868e-19
ENSG00000167862	ICT1	3396	immature colon carcinoma transcript 1 [Source:HGNC Symbol;Acc:HGNC:5359]	-0.965854665412349	8.56341655611647e-20	9.98105353879864e-19
ENSG00000005189		81691	Putative RNA exonuclease NEF-sp [Source:UniProtKB/Swiss-Prot;Acc:Q96IC2]	-1.44717851363097	8.72874044106734e-20	1.01677474147244e-18
ENSG00000134748	PRPF38A	84950	pre-mRNA processing factor 38A [Source:HGNC Symbol;Acc:HGNC:25930]	-0.921353174690265	8.92498519209048e-20	1.0390218471122e-18
ENSG00000125870	SNRPB2	6629	small nuclear ribonucleoprotein polypeptide B [Source:HGNC Symbol;Acc:HGNC:11155]	-0.748582189655084	9.28394094290793e-20	1.08017395328674e-18
ENSG00000175183	CSRP2	1466	cysteine and glycine-rich protein 2 [Source:HGNC Symbol;Acc:HGNC:2470]	-1.49937777575101	9.4643675769543e-20	1.10051822160276e-18
ENSG00000107951	MTPAP	55149	mitochondrial poly(A) polymerase [Source:HGNC Symbol;Acc:HGNC:25532]	-0.83955614218989	9.59316668029135e-20	1.11483882903433e-18
ENSG00000198176	TFDP1	7027	transcription factor Dp-1 [Source:HGNC Symbol;Acc:HGNC:11749]	-0.926108803589354	9.93270932988754e-20	1.15346616677586e-18
ENSG00000255823	MTRNR2L8	100463486	MT-RNR2-like 8 [Source:HGNC Symbol;Acc:HGNC:37165]	1.77860511192353	9.93723130113642e-20	1.15346616677586e-18
ENSG00000108423	TUBD1	51174	tubulin, delta 1 [Source:HGNC Symbol;Acc:HGNC:16811]	-1.02252472339715	9.94553965995226e-20	1.15375268069299e-18
ENSG00000267397		NA		2.59158861002397	1.09072479513597e-19	1.26457506177853e-18
ENSG00000041880	PARP3	10039	poly (ADP-ribose) polymerase family, member 3 [Source:HGNC Symbol;Acc:HGNC:273]	1.09814834917339	1.09522231764381e-19	1.26904469837954e-18
ENSG00000186918	ZNF395	55893	zinc finger protein 395 [Source:HGNC Symbol;Acc:HGNC:18737]	-1.18343656471441	1.11373821869638e-19	1.28974280472249e-18
ENSG00000229425		NA		2.14435398769982	1.12757553974936e-19	1.30500189591614e-18
ENSG00000165195	PIGA	5277	phosphatidylinositol glycan anchor biosynthesis, class A [Source:HGNC Symbol;Acc:HGNC:8957]	-0.933945800732202	1.12901761215771e-19	1.30590585162692e-18
ENSG00000140564	FURIN	5045	furin (paired basic amino acid cleaving enzyme) [Source:HGNC Symbol;Acc:HGNC:8568]	0.801466815674572	1.14623006828967e-19	1.32503927613404e-18
ENSG00000106028	SSBP1	6742	single-stranded DNA binding protein 1, mitochondrial [Source:HGNC Symbol;Acc:HGNC:11317]	-0.794480973501771	1.15248627861338e-19	1.33149233451965e-18
ENSG00000019144	PHLDB1	23187	pleckstrin homology-like domain, family B, member 1 [Source:HGNC Symbol;Acc:HGNC:23697]	1.11548168489049	1.18004618530886e-19	1.36253608632156e-18
ENSG00000166710	B2M	567	beta-2-microglobulin [Source:HGNC Symbol;Acc:HGNC:914]	0.795925052679114	1.18558337467271e-19	1.36812997371694e-18
ENSG00000185261	KIAA0825	285600	KIAA0825 [Source:HGNC Symbol;Acc:HGNC:28532]	1.74766847011639	1.21586637566047e-19	1.40225663266482e-18
ENSG00000280208		NA		1.84329574123255	1.22248762835476e-19	1.4090703375599e-18
ENSG00000099139	PCSK5	5125	proprotein convertase subtilisin/kexin type 5 [Source:HGNC Symbol;Acc:HGNC:8747]	1.75827333182249	1.23401597327303e-19	1.42152883778321e-18
ENSG00000085231	AK6	6880,102157402	adenylate kinase 6 [Source:HGNC Symbol;Acc:HGNC:49151]	-0.882889395580292	1.29266571064035e-19	1.48822283096799e-18
ENSG00000171204	TMEM126B	55863	transmembrane protein 126B [Source:HGNC Symbol;Acc:HGNC:30883]	-0.796673840788541	1.29673734045506e-19	1.49204093756727e-18
ENSG00000064205	WISP2	8839	WNT1 inducible signaling pathway protein 2 [Source:HGNC Symbol;Acc:HGNC:12770]	1.36480304067734	1.30410992975566e-19	1.49965051060842e-18
ENSG00000099814	CEP170B	283638	centrosomal protein 170B [Source:HGNC Symbol;Acc:HGNC:20362]	0.843654146128942	1.33831882933715e-19	1.53809347250638e-18
ENSG00000150627	WDR17	116966	WD repeat domain 17 [Source:HGNC Symbol;Acc:HGNC:16661]	-1.11335963863563	1.3477031703294e-19	1.54797812982719e-18
ENSG00000179958	DCTPP1	79077	dCTP pyrophosphatase 1 [Source:HGNC Symbol;Acc:HGNC:28777]	-1.1475406717003	1.3518872293233e-19	1.55188170264445e-18
ENSG00000254761		NA		3.70285207280053	1.48155418024868e-19	1.69974357636428e-18
ENSG00000221968	FADS3	3995	fatty acid desaturase 3 [Source:HGNC Symbol;Acc:HGNC:3576]	1.0744407670356	1.50378256798716e-19	1.72424424916741e-18
ENSG00000155438	NIFK	84365	nucleolar protein interacting with the FHA domain of MKI67 [Source:HGNC Symbol;Acc:HGNC:17838]	-0.802683311293401	1.53228654742587e-19	1.75590794843072e-18
ENSG00000252835	SCARNA21	677763	small Cajal body-specific RNA 21 [Source:HGNC Symbol;Acc:HGNC:32579]	0.937806311538681	1.58798301071045e-19	1.81867781794757e-18
ENSG00000141858	SAMD1	NA	sterile alpha motif domain containing 1 [Source:HGNC Symbol;Acc:HGNC:17958]	-0.994482249457172	1.6116086966877e-19	1.84466636221102e-18
ENSG00000184207	PGP	283871	phosphoglycolate phosphatase [Source:HGNC Symbol;Acc:HGNC:8909]	-0.82920115072403	1.61369862209887e-19	1.84598899699973e-18
ENSG00000099957	P2RX6	9127	purinergic receptor P2X, ligand gated ion channel, 6 [Source:HGNC Symbol;Acc:HGNC:8538]	1.54823656320718	1.66027935582e-19	1.89817586536921e-18
ENSG00000101811	CSTF2	1478	cleavage stimulation factor, 3' pre-RNA, subunit 2, 64kDa [Source:HGNC Symbol;Acc:HGNC:2484]	-0.825791972224227	1.68049749351212e-19	1.92017978495231e-18
ENSG00000136999	NOV	4856	nephroblastoma overexpressed [Source:HGNC Symbol;Acc:HGNC:7885]	1.37156705279378	1.69514193840739e-19	1.93579330261135e-18
ENSG00000105928	DFNA5	1687	deafness, autosomal dominant 5 [Source:HGNC Symbol;Acc:HGNC:2810]	0.809731147157603	1.78806075732861e-19	2.04072376209035e-18
ENSG00000130810	PPAN	56342	peter pan homolog (Drosophila) [Source:HGNC Symbol;Acc:HGNC:9227]	-0.989327745846934	1.80338849054155e-19	2.05702904267546e-18
ENSG00000153391	INO80C	125476	INO80 complex subunit C [Source:HGNC Symbol;Acc:HGNC:26994]	1.19793390143043	1.81042843023952e-19	2.06386751689624e-18
ENSG00000148334	PTGES2	80142	prostaglandin E synthase 2 [Source:HGNC Symbol;Acc:HGNC:17822]	-0.955773441886468	1.85195536464829e-19	2.10999020668925e-18
ENSG00000265303		NA	Uncharacterized protein [Source:UniProtKB/TrEMBL;Acc:J3QRE1]	-1.11185064374214	1.87128215405223e-19	2.13078099339803e-18
ENSG00000185215	TNFAIP2	7127	tumor necrosis factor, alpha-induced protein 2 [Source:HGNC Symbol;Acc:HGNC:11895]	1.05518667698466	1.88373154638807e-19	2.14372122295177e-18
ENSG00000241489		NA	Iduronate 2-sulfatase (Hunter syndrome), isoform CRA_e; Uncharacterized protein; cDNA FLJ42669 fis, clone BRAMY2022168, highly similar to IDURONATE 2-SULFATASE (EC 3.1.6.13) [Source:UniProtKB/TrEMBL;Acc:B3KWA1]	0.721855180919904	1.88959837318789e-19	2.14915978472654e-18
ENSG00000279821		NA		2.60481066882029	1.94740215596617e-19	2.21362928614889e-18
ENSG00000132688	NES	10763	nestin [Source:HGNC Symbol;Acc:HGNC:7756]	-1.47289149527771	1.95180776135331e-19	2.21736136476688e-18
ENSG00000270617	URGCP-MRPS24	100534592	URGCP-MRPS24 readthrough [Source:HGNC Symbol;Acc:HGNC:49188]	-0.909501678765536	1.95497397099578e-19	2.21968194086164e-18
ENSG00000171150	SOCS5	9655	suppressor of cytokine signaling 5 [Source:HGNC Symbol;Acc:HGNC:16852]	0.739534583878214	1.9768367550129e-19	2.24321579161602e-18
ENSG00000179950	PUF60	22827	poly-U binding splicing factor 60KDa [Source:HGNC Symbol;Acc:HGNC:17042]	-0.799338206355996	2.0195416347749e-19	2.29035961748639e-18
ENSG00000119640	ACYP1	97	acylphosphatase 1, erythrocyte (common) type [Source:HGNC Symbol;Acc:HGNC:179]	-1.29499851142595	2.0511362506305e-19	2.3248564410474e-18
ENSG00000138495	COX17	10063	COX17 cytochrome c oxidase copper chaperone [Source:HGNC Symbol;Acc:HGNC:2264]	-0.981361306159645	2.08624436899186e-19	2.36329379322266e-18
ENSG00000196502	SULT1A1	6817	sulfotransferase family, cytosolic, 1A, phenol-preferring, member 1 [Source:HGNC Symbol;Acc:HGNC:11453]	1.29649127132239	2.09378148476823e-19	2.3704726081995e-18
ENSG00000102003	SYP	6855	synaptophysin [Source:HGNC Symbol;Acc:HGNC:11506]	-1.82515775878414	2.15215324283808e-19	2.43516262689055e-18
ENSG00000137309	HMGA1	3159	high mobility group AT-hook 1 [Source:HGNC Symbol;Acc:HGNC:5010]	-0.953579073028631	2.17633544213769e-19	2.46111522580837e-18
ENSG00000256325		NA		2.47295714158936	2.20098790633053e-19	2.48756962685732e-18
ENSG00000165424	ZCCHC24	219654	zinc finger, CCHC domain containing 24 [Source:HGNC Symbol;Acc:HGNC:26911]	1.0852148136237	2.21758167625187e-19	2.50489100034488e-18
ENSG00000150347	ARID5B	84159	AT rich interactive domain 5B (MRF1-like) [Source:HGNC Symbol;Acc:HGNC:17362]	1.70385934707051	2.26890280163895e-19	2.56139678566738e-18
ENSG00000115233	PSMD14	10213	proteasome (prosome, macropain) 26S subunit, non-ATPase, 14 [Source:HGNC Symbol;Acc:HGNC:16889]	-0.803401078861589	2.44067891061471e-19	2.75374372119384e-18
ENSG00000180198	RCC1	1104	regulator of chromosome condensation 1 [Source:HGNC Symbol;Acc:HGNC:1913]	-0.828224178133652	2.47040087620495e-19	2.78568719807677e-18
ENSG00000119121	TRPM6	140803	transient receptor potential cation channel, subfamily M, member 6 [Source:HGNC Symbol;Acc:HGNC:17995]	1.20898739992388	2.48880764367681e-19	2.80484220242323e-18
ENSG00000280143		NA		3.93407611422128	2.49671561607455e-19	2.81215015457063e-18
ENSG00000082898	XPO1	7514	exportin 1 [Source:HGNC Symbol;Acc:HGNC:12825]	-0.953970726779906	2.50469325531277e-19	2.81952820239083e-18
ENSG00000100804	PSMB5	5693	proteasome (prosome, macropain) subunit, beta type, 5 [Source:HGNC Symbol;Acc:HGNC:9542]	-0.791694533686629	2.52357725484518e-19	2.8391681233896e-18
ENSG00000163683	SMIM14	201895	small integral membrane protein 14 [Source:HGNC Symbol;Acc:HGNC:27321]	0.954916742584744	2.56773230356094e-19	2.88720087587649e-18
ENSG00000176101	SSNA1	8636	Sjogren syndrome nuclear autoantigen 1 [Source:HGNC Symbol;Acc:HGNC:11321]	-0.993300128319371	2.59339351381126e-19	2.91439603292692e-18
ENSG00000140836	ZFHX3	463	zinc finger homeobox 3 [Source:HGNC Symbol;Acc:HGNC:777]	0.837846749495892	2.59609348022959e-19	2.91577161997815e-18
ENSG00000213593	TMX2	51075	thioredoxin-related transmembrane protein 2 [Source:HGNC Symbol;Acc:HGNC:30739]	-0.756532621873579	2.625274900393e-19	2.94687107569114e-18
ENSG00000163637	PRICKLE2	166336	prickle homolog 2 (Drosophila) [Source:HGNC Symbol;Acc:HGNC:20340]	1.03256114638104	2.65006898278966e-19	2.97301322112394e-18
ENSG00000270882	HIST2H4A	8370	histone cluster 2, H4a [Source:HGNC Symbol;Acc:HGNC:4794]	-1.82095016817381	2.7365901509057e-19	3.06833569927883e-18
ENSG00000187778	MCRS1	10445	microspherule protein 1 [Source:HGNC Symbol;Acc:HGNC:6960]	-0.800938231144804	2.82473701594001e-19	3.16537178031259e-18
ENSG00000099817	POLR2E	5434	polymerase (RNA) II (DNA directed) polypeptide E, 25kDa [Source:HGNC Symbol;Acc:HGNC:9192]	-0.949698888354507	2.87144398860118e-19	3.21588704301616e-18
ENSG00000071626	DAZAP1	26528	DAZ associated protein 1 [Source:HGNC Symbol;Acc:HGNC:2683]	-0.789432712181158	2.88276023895869e-19	3.22673151732962e-18
ENSG00000182700	IGIP	492311	IgA-inducing protein [Source:HGNC Symbol;Acc:HGNC:33847]	1.39708219647416	2.91709176730735e-19	3.26331058634904e-18
ENSG00000213753	CENPBD1P1	65996	CENPB DNA-binding domains containing 1 pseudogene 1 [Source:HGNC Symbol;Acc:HGNC:28421]	-0.866328655581797	2.93388624620708e-19	3.28024089870215e-18
ENSG00000155368	DBI	1622	diazepam binding inhibitor (GABA receptor modulator, acyl-CoA binding protein) [Source:HGNC Symbol;Acc:HGNC:2690]	-0.796997291321884	3.04027380162514e-19	3.39726522765307e-18
ENSG00000242485	MRPL20	55052	mitochondrial ribosomal protein L20 [Source:HGNC Symbol;Acc:HGNC:14478]	-0.813188189842813	3.07437872904616e-19	3.43343279655375e-18
ENSG00000196550	FAM72A	554282,728833,729533	family with sequence similarity 72, member A [Source:HGNC Symbol;Acc:HGNC:24044]	-1.83773942202703	3.09849408392974e-19	3.4584095549218e-18
ENSG00000114638	UPK1B	7348	uroplakin 1B [Source:HGNC Symbol;Acc:HGNC:12578]	-1.0533867947969	3.1478588297553e-19	3.51152450822393e-18
ENSG00000060982	BCAT1	586	branched chain amino-acid transaminase 1, cytosolic [Source:HGNC Symbol;Acc:HGNC:976]	-0.834780776099652	3.21216339848095e-19	3.58123589731318e-18
ENSG00000078804	TP53INP2	58476	tumor protein p53 inducible nuclear protein 2 [Source:HGNC Symbol;Acc:HGNC:16104]	1.72030178795629	3.42847690939607e-19	3.82024759289502e-18
ENSG00000144891	AGTR1	185	angiotensin II receptor, type 1 [Source:HGNC Symbol;Acc:HGNC:336]	2.0753797279242	3.5101137657498e-19	3.90900831770873e-18
ENSG00000164284	GRPEL2	134266	GrpE-like 2, mitochondrial (E. coli) [Source:HGNC Symbol;Acc:HGNC:21060]	-0.789781843096412	3.56096128621453e-19	3.96340006594108e-18
ENSG00000067715	SYT1	6857	synaptotagmin I [Source:HGNC Symbol;Acc:HGNC:11509]	0.883409912623884	3.56722149120229e-19	3.96813219483066e-18
ENSG00000162734	PEA15	8682	phosphoprotein enriched in astrocytes 15 [Source:HGNC Symbol;Acc:HGNC:8822]	1.00286099496569	3.68179194536444e-19	4.09327415152616e-18
ENSG00000164663	USP49	25862	ubiquitin specific peptidase 49 [Source:HGNC Symbol;Acc:HGNC:20078]	1.20244542217882	3.69476889256761e-19	4.10539112719717e-18
ENSG00000232653	GOLGA8N	643699	golgin A8 family, member N [Source:HGNC Symbol;Acc:HGNC:44405]	1.82418710038619	3.72669107086733e-19	4.13853337808066e-18
ENSG00000198917	C9orf114	51490	chromosome 9 open reading frame 114 [Source:HGNC Symbol;Acc:HGNC:26933]	-0.891427915668431	3.86966982924909e-19	4.29489871610365e-18
ENSG00000010404	IDS	3423	iduronate 2-sulfatase [Source:HGNC Symbol;Acc:HGNC:5389]	0.773748491007247	3.96061689968566e-19	4.39183527439148e-18
ENSG00000011422	PLAUR	5329	plasminogen activator, urokinase receptor [Source:HGNC Symbol;Acc:HGNC:9053]	0.990721096666848	3.96145498024175e-19	4.39183527439148e-18
ENSG00000066032	CTNNA2	1496	catenin (cadherin-associated protein), alpha 2 [Source:HGNC Symbol;Acc:HGNC:2510]	3.04237528115653	4.08670519851202e-19	4.52815187334849e-18
ENSG00000253051		NA	Small nucleolar RNA SNORA31 [Source:RFAM;Acc:RF00322]	-1.36626053361332	4.10518028211254e-19	4.54607296263539e-18
ENSG00000102109	PCSK1N	27344	proprotein convertase subtilisin/kexin type 1 inhibitor [Source:HGNC Symbol;Acc:HGNC:17301]	1.42740955388306	4.17726109328419e-19	4.6233036503598e-18
ENSG00000142864	SERBP1	26135	SERPINE1 mRNA binding protein 1 [Source:HGNC Symbol;Acc:HGNC:17860]	-0.978172372727225	4.27916330111552e-19	4.73343506029329e-18
ENSG00000180921	FAM83H	286077	family with sequence similarity 83, member H [Source:HGNC Symbol;Acc:HGNC:24797]	0.83709748797091	4.30006073223756e-19	4.75388919004394e-18
ENSG00000116750	UCHL5	51377	ubiquitin carboxyl-terminal hydrolase L5 [Source:HGNC Symbol;Acc:HGNC:19678]	-0.872486090618288	4.37769145628896e-19	4.83700628693762e-18
ENSG00000112110	MRPL18	29074	mitochondrial ribosomal protein L18 [Source:HGNC Symbol;Acc:HGNC:14477]	-0.869532953990202	4.44622788113158e-19	4.90998759193043e-18
ENSG00000198331	HYLS1	219844	hydrolethalus syndrome 1 [Source:HGNC Symbol;Acc:HGNC:26558]	-0.987272734204843	4.47511013491431e-19	4.93912155448978e-18
ENSG00000148362	C9orf142	286257	chromosome 9 open reading frame 142 [Source:HGNC Symbol;Acc:HGNC:27849]	-1.11702490868622	4.50644768077675e-19	4.97093134457987e-18
ENSG00000240342	RPS2P5	NA	ribosomal protein S2 pseudogene 5 [Source:HGNC Symbol;Acc:HGNC:31386]	-0.836119382079875	4.69820760287932e-19	5.1795641407636e-18
ENSG00000188986	NELFB	25920	negative elongation factor complex member B [Source:HGNC Symbol;Acc:HGNC:24324]	-0.870262960785979	4.70633314181265e-19	5.1856284188316e-18
ENSG00000152154	TMEM178A	130733	transmembrane protein 178A [Source:HGNC Symbol;Acc:HGNC:28517]	3.93510778594955	4.86428151525178e-19	5.35667478346233e-18
ENSG00000166446	CDYL2	124359	chromodomain protein, Y-like 2 [Source:HGNC Symbol;Acc:HGNC:23030]	2.60244508021475	5.09044401048843e-19	5.60260790368854e-18
ENSG00000148335	NTMT1	28989	N-terminal Xaa-Pro-Lys N-methyltransferase 1 [Source:HGNC Symbol;Acc:HGNC:23373]	-0.982938011883958	5.15766727333695e-19	5.67343400067065e-18
ENSG00000129003	VPS13C	54832	vacuolar protein sorting 13 homolog C (S. cerevisiae) [Source:HGNC Symbol;Acc:HGNC:23594]	0.996033654810252	5.24980924106411e-19	5.77157659245757e-18
ENSG00000184343	SRPK3	26576	SRSF protein kinase 3 [Source:HGNC Symbol;Acc:HGNC:11402]	2.28528668279031	5.8084396523749e-19	6.38217651681416e-18
ENSG00000136842	TMOD1	7111	tropomodulin 1 [Source:HGNC Symbol;Acc:HGNC:11871]	1.7732096096499	5.87136725779971e-19	6.44773382685331e-18
ENSG00000140511	HAPLN3	145864	hyaluronan and proteoglycan link protein 3 [Source:HGNC Symbol;Acc:HGNC:21446]	1.59253360426012	6.01225772811347e-19	6.59878687092276e-18
ENSG00000154358	OBSCN	84033	obscurin, cytoskeletal calmodulin and titin-interacting RhoGEF [Source:HGNC Symbol;Acc:HGNC:15719]	0.965435866840668	6.28585719820715e-19	6.89524679665633e-18
ENSG00000238741	SCARNA7	677767	small Cajal body-specific RNA 7 [Source:HGNC Symbol;Acc:HGNC:32563]	0.948365841146601	6.36690378747775e-19	6.97653747135118e-18
ENSG00000179262	RAD23A	5886	RAD23 homolog A (S. cerevisiae) [Source:HGNC Symbol;Acc:HGNC:9812]	-0.777271992424697	6.3670262506814e-19	6.97653747135118e-18
ENSG00000173698	ADGRG2	10149	adhesion G protein-coupled receptor G2 [Source:HGNC Symbol;Acc:HGNC:4516]	-0.978129471753328	6.40830400838976e-19	7.01787438967562e-18
ENSG00000224818		NA		1.43298862440616	6.55138078321251e-19	7.17058608050673e-18
ENSG00000095059	DHPS	1725	deoxyhypusine synthase [Source:HGNC Symbol;Acc:HGNC:2869]	-0.920024623070017	6.5775040407415e-19	7.19519212784546e-18
ENSG00000170089		NA		-1.16028158801274	6.74697013309599e-19	7.37648820970916e-18
ENSG00000143799	PARP1	142	poly (ADP-ribose) polymerase 1 [Source:HGNC Symbol;Acc:HGNC:270]	-0.781805765089071	6.90351760993501e-19	7.54346758306836e-18
ENSG00000188706	ZDHHC9	51114	zinc finger, DHHC-type containing 9 [Source:HGNC Symbol;Acc:HGNC:18475]	0.750388165399876	7.20470390754041e-19	7.86822169139682e-18
ENSG00000258181		NA		2.12907202832547	7.44018074588122e-19	8.12089562517289e-18
ENSG00000134333	LDHA	3939	lactate dehydrogenase A [Source:HGNC Symbol;Acc:HGNC:6535]	-1.07950537832343	7.50145113561586e-19	8.1832506148662e-18
ENSG00000081760	AACS	65985	acetoacetyl-CoA synthetase [Source:HGNC Symbol;Acc:HGNC:21298]	0.742778247319	7.79171828701675e-19	8.49520896679376e-18
ENSG00000175538	KCNE3	10008	potassium channel, voltage gated subfamily E regulatory beta subunit 3 [Source:HGNC Symbol;Acc:HGNC:6243]	3.39771121452854	7.95828814194532e-19	8.67203202053347e-18
ENSG00000184500	PROS1	5627	protein S (alpha) [Source:HGNC Symbol;Acc:HGNC:9456]	1.00582893982074	8.31981762663483e-19	9.06098770847838e-18
ENSG00000112406	HECA	51696	headcase homolog (Drosophila) [Source:HGNC Symbol;Acc:HGNC:21041]	1.14623199039771	8.54635007339808e-19	9.30257256474118e-18
ENSG00000106366	SERPINE1	5054	serpin peptidase inhibitor, clade E (nexin, plasminogen activator inhibitor type 1), member 1 [Source:HGNC Symbol;Acc:HGNC:8583]	2.0440949830371	8.58215157516485e-19	9.3363979360659e-18
ENSG00000171533	MAP6	4135	microtubule-associated protein 6 [Source:HGNC Symbol;Acc:HGNC:6868]	1.566505107381	8.61843613836955e-19	9.37071130157561e-18
ENSG00000140284	SLC27A2	11001	solute carrier family 27 (fatty acid transporter), member 2 [Source:HGNC Symbol;Acc:HGNC:10996]	0.734755626181463	8.71858389060061e-19	9.47438632248105e-18
ENSG00000184983	NDUFA6	4700	NADH dehydrogenase (ubiquinone) 1 alpha subcomplex, 6, 14kDa [Source:HGNC Symbol;Acc:HGNC:7690]	-0.895835690891344	8.7348293049272e-19	9.48682175635744e-18
ENSG00000164134	NAA15	80155	N(alpha)-acetyltransferase 15, NatA auxiliary subunit [Source:HGNC Symbol;Acc:HGNC:30782]	-0.894740679987422	8.85897154621718e-19	9.61636493775091e-18
ENSG00000116560	SFPQ	6421	splicing factor proline/glutamine-rich [Source:HGNC Symbol;Acc:HGNC:10774]	-0.811290147649498	9.32742070465751e-19	1.01193038682709e-17
ENSG00000074964	ARHGEF10L	55160	Rho guanine nucleotide exchange factor (GEF) 10-like [Source:HGNC Symbol;Acc:HGNC:25540]	0.899784449111436	9.49594551851699e-19	1.02964818695841e-17
ENSG00000213160	KLHL23	151230,100526832	kelch-like family member 23 [Source:HGNC Symbol;Acc:HGNC:27506]	-0.850550010883999	9.7059368903579e-19	1.05184031380094e-17
ENSG00000173706	HEG1	57493	heart development protein with EGF-like domains 1 [Source:HGNC Symbol;Acc:HGNC:29227]	1.01073677610032	1.00633962405589e-18	1.08998057087984e-17
ENSG00000103811	CTSH	1512	cathepsin H [Source:HGNC Symbol;Acc:HGNC:2535]	0.898182802190968	1.0127316797117e-18	1.09630285284297e-17
ENSG00000129460	NGDN	25983	neuroguidin, EIF4E binding protein [Source:HGNC Symbol;Acc:HGNC:20271]	-0.815524123278619	1.02441668811708e-18	1.10834480232426e-17
ENSG00000182796	TMEM198B	440104	transmembrane protein 198B, pseudogene [Source:HGNC Symbol;Acc:HGNC:43629]	1.50661326242869	1.0368171053091e-18	1.1211471665291e-17
ENSG00000239775		NA		1.74119681340115	1.04539530525734e-18	1.1298046854849e-17
ENSG00000138621	PPCDC	60490	phosphopantothenoylcysteine decarboxylase [Source:HGNC Symbol;Acc:HGNC:28107]	-0.989807124383439	1.05185875675677e-18	1.13616848542848e-17
ENSG00000164933	SLC25A32	81034	solute carrier family 25 (mitochondrial folate carrier), member 32 [Source:HGNC Symbol;Acc:HGNC:29683]	-0.826010128070681	1.08522198494216e-18	1.17156532975505e-17
ENSG00000103275	UBE2I	7329	ubiquitin-conjugating enzyme E2I [Source:HGNC Symbol;Acc:HGNC:12485]	-0.767267936122947	1.10918269011542e-18	1.19677843942765e-17
ENSG00000129007	CALML4	91860	calmodulin-like 4 [Source:HGNC Symbol;Acc:HGNC:18445]	-1.1622909025513	1.11393093654323e-18	1.20117413952078e-17
ENSG00000154265	ABCA5	23461	ATP-binding cassette, sub-family A (ABC1), member 5 [Source:HGNC Symbol;Acc:HGNC:35]	0.846451643974023	1.11447266538854e-18	1.20117413952078e-17
ENSG00000182158	CREB3L2	64764	cAMP responsive element binding protein 3-like 2 [Source:HGNC Symbol;Acc:HGNC:23720]	0.77502600922125	1.11665504906057e-18	1.20287007356819e-17
ENSG00000181045	SLC26A11	284129	solute carrier family 26 (anion exchanger), member 11 [Source:HGNC Symbol;Acc:HGNC:14471]	0.826689474603175	1.1229873976307e-18	1.2090320995963e-17
ENSG00000145041	VPRBP	9730	Vpr (HIV-1) binding protein [Source:HGNC Symbol;Acc:HGNC:30911]	-0.743448236576464	1.15483230457029e-18	1.24263981530994e-17
ENSG00000163328	GPR155	151556	G protein-coupled receptor 155 [Source:HGNC Symbol;Acc:HGNC:22951]	1.75915924749846	1.17568124041542e-18	1.26438533400365e-17
ENSG00000224078	SNHG14	NA	small nucleolar RNA host gene 14 [Source:HGNC Symbol;Acc:HGNC:37462]	0.7841479140953	1.17639548526019e-18	1.2644651363874e-17
ENSG00000156675	RAB11FIP1	80223	RAB11 family interacting protein 1 (class I) [Source:HGNC Symbol;Acc:HGNC:30265]	0.815172164800293	1.21325711371195e-18	1.30337724516004e-17
ENSG00000103540	CCP110	9738	centriolar coiled coil protein 110kDa [Source:HGNC Symbol;Acc:HGNC:24342]	-0.786952680813312	1.22056242082636e-18	1.31051256444813e-17
ENSG00000158445	KCNB1	3745	potassium channel, voltage gated Shab related subfamily B, member 1 [Source:HGNC Symbol;Acc:HGNC:6231]	1.92528649549042	1.23192583085885e-18	1.32199493288688e-17
ENSG00000277534		NA		-0.976946973289636	1.24312473463686e-18	1.33328839617187e-17
ENSG00000244332		NA		-1.4880171215492	1.26413815174411e-18	1.35509025099602e-17
ENSG00000125977	EIF2S2	8894	eukaryotic translation initiation factor 2, subunit 2 beta, 38kDa [Source:HGNC Symbol;Acc:HGNC:3266]	-0.774466424091341	1.26568604149847e-18	1.35601374380931e-17
ENSG00000183048	SLC25A10	1468	solute carrier family 25 (mitochondrial carrier; dicarboxylate transporter), member 10 [Source:HGNC Symbol;Acc:HGNC:10980]	-1.10549217010251	1.29589948587598e-18	1.38730296277014e-17
ENSG00000108528	SLC25A11	8402	solute carrier family 25 (mitochondrial carrier; oxoglutarate carrier), member 11 [Source:HGNC Symbol;Acc:HGNC:10981]	-0.787736491995634	1.29629543899255e-18	1.38730296277014e-17
ENSG00000128915	ICE2	79664	interactor of little elongation complex ELL subunit 2 [Source:HGNC Symbol;Acc:HGNC:29885]	-0.706643892995825	1.32218951701499e-18	1.41424884126411e-17
ENSG00000215417	MIR17HG	407975	miR-17-92 cluster host gene [Source:HGNC Symbol;Acc:HGNC:23564]	-1.39759097575341	1.32729295626994e-18	1.41893937467905e-17
ENSG00000155755	TMEM237	65062	transmembrane protein 237 [Source:HGNC Symbol;Acc:HGNC:14432]	-0.826915926166682	1.34212420840655e-18	1.4340187053153e-17
ENSG00000186017	ZNF566	84924	zinc finger protein 566 [Source:HGNC Symbol;Acc:HGNC:25919]	-1.00475628243392	1.37355935989503e-18	1.46681290346412e-17
ENSG00000102007	PLP2	5355	proteolipid protein 2 (colonic epithelium-enriched) [Source:HGNC Symbol;Acc:HGNC:9087]	-0.770011011640568	1.38082894398029e-18	1.47377939585492e-17
ENSG00000101464	PIGU	128869	phosphatidylinositol glycan anchor biosynthesis, class U [Source:HGNC Symbol;Acc:HGNC:15791]	-0.899624035658112	1.3863579204185e-18	1.47888159156522e-17
ENSG00000140682	TGFB1I1	7041	transforming growth factor beta 1 induced transcript 1 [Source:HGNC Symbol;Acc:HGNC:11767]	1.06118178687771	1.43110604292593e-18	1.52579228192362e-17
ENSG00000141560	FN3KRP	79672	fructosamine 3 kinase related protein [Source:HGNC Symbol;Acc:HGNC:25700]	-0.937101352141607	1.44424379710146e-18	1.53896874085957e-17
ENSG00000169446	MMGT1	93380	membrane magnesium transporter 1 [Source:HGNC Symbol;Acc:HGNC:28100]	-0.813042210040901	1.49339196339993e-18	1.59048256759725e-17
ENSG00000136542	GALNT5	11227	polypeptide N-acetylgalactosaminyltransferase 5 [Source:HGNC Symbol;Acc:HGNC:4127]	1.06877769019932	1.51953777757291e-18	1.61671046440077e-17
ENSG00000110719	TCIRG1	10312	T-cell, immune regulator 1, ATPase, H+ transporting, lysosomal V0 subunit A3 [Source:HGNC Symbol;Acc:HGNC:11647]	0.860232819281392	1.5196554628428e-18	1.61671046440077e-17
ENSG00000146834	MEPCE	56257	methylphosphate capping enzyme [Source:HGNC Symbol;Acc:HGNC:20247]	-0.9521305539978	1.53145190420518e-18	1.62838341331956e-17
ENSG00000109519	GRPEL1	80273	GrpE-like 1, mitochondrial (E. coli) [Source:HGNC Symbol;Acc:HGNC:19696]	-0.890215996386736	1.55147313397066e-18	1.64878446663391e-17
ENSG00000171497	PPID	5481	peptidylprolyl isomerase D [Source:HGNC Symbol;Acc:HGNC:9257]	-0.819041069264458	1.55323936291177e-18	1.64977402439166e-17
ENSG00000120800	UTP20	27340	UTP20, small subunit (SSU) processome component, homolog (yeast) [Source:HGNC Symbol;Acc:HGNC:17897]	-0.894901278405953	1.57712337468778e-18	1.67424231006619e-17
ENSG00000130584	ZBTB46	140685	zinc finger and BTB domain containing 46 [Source:HGNC Symbol;Acc:HGNC:16094]	1.60667639757142	1.58157587503276e-18	1.67806729254281e-17
ENSG00000181744	C3orf58	205428	chromosome 3 open reading frame 58 [Source:HGNC Symbol;Acc:HGNC:28490]	-0.830800087265783	1.58639113176283e-18	1.68227285019358e-17
ENSG00000160752	FDPS	2224	farnesyl diphosphate synthase [Source:HGNC Symbol;Acc:HGNC:3631]	-0.832539052044828	1.60186703658539e-18	1.69777280980585e-17
ENSG00000138061	CYP1B1	1545	cytochrome P450, family 1, subfamily B, polypeptide 1 [Source:HGNC Symbol;Acc:HGNC:2597]	-0.892126172502193	1.67062903846935e-18	1.76970226723863e-17
ENSG00000141994	DUS3L	56931	dihydrouridine synthase 3-like (S. cerevisiae) [Source:HGNC Symbol;Acc:HGNC:26920]	-1.05516458667728	1.71957904434426e-18	1.81992470883579e-17
ENSG00000241978	AKAP2	11217	A kinase (PRKA) anchor protein 2 [Source:HGNC Symbol;Acc:HGNC:372]	1.34077920975345	1.71988227950821e-18	1.81992470883579e-17
ENSG00000115207	GTF3C2	2976	general transcription factor IIIC, polypeptide 2, beta 110kDa [Source:HGNC Symbol;Acc:HGNC:4665]	-0.766713909259432	1.74648059896684e-18	1.84708087329705e-17
ENSG00000251503	APITD1-CORT	100526739	APITD1-CORT readthrough [Source:HGNC Symbol;Acc:HGNC:38843]	-1.20994993291701	1.80027082790135e-18	1.90295080128513e-17
ENSG00000173660	UQCRH	7388	ubiquinol-cytochrome c reductase hinge protein [Source:HGNC Symbol;Acc:HGNC:12590]	-0.79301233861275	1.81845174602806e-18	1.92114078580376e-17
ENSG00000215559	ANKRD20A11P	391267	ankyrin repeat domain 20 family, member A11, pseudogene [Source:HGNC Symbol;Acc:HGNC:42024]	1.88509784626139	1.90425202827715e-18	2.0107110139307e-17
ENSG00000175548	ALG10B	144245	ALG10B, alpha-1,2-glucosyltransferase [Source:HGNC Symbol;Acc:HGNC:31088]	-0.804620965169876	1.93213499542733e-18	2.03906297914863e-17
ENSG00000008018	PSMB1	5689	proteasome (prosome, macropain) subunit, beta type, 1 [Source:HGNC Symbol;Acc:HGNC:9537]	-0.831593862649281	2.02978695827625e-18	2.14097550174616e-17
ENSG00000142507	PSMB6	5694	proteasome (prosome, macropain) subunit, beta type, 6 [Source:HGNC Symbol;Acc:HGNC:9543]	-0.880479246425808	2.04146474910281e-18	2.15214394788021e-17
ENSG00000042493	CAPG	822	capping protein (actin filament), gelsolin-like [Source:HGNC Symbol;Acc:HGNC:1474]	0.972192867485984	2.05559918810836e-18	2.16588893654767e-17
ENSG00000240720	LRRD1	401387	leucine-rich repeats and death domain containing 1 [Source:HGNC Symbol;Acc:HGNC:34300]	-0.792671843762522	2.07247668691868e-18	2.18250796517939e-17
ENSG00000183605	SFXN4	119559	sideroflexin 4 [Source:HGNC Symbol;Acc:HGNC:16088]	-0.853274348713417	2.08379980311368e-18	2.19326312788033e-17
ENSG00000124181	PLCG1	5335	phospholipase C, gamma 1 [Source:HGNC Symbol;Acc:HGNC:9065]	0.848401742913002	2.19036614059087e-18	2.30419986546929e-17
ENSG00000135624	CCT7	10574	chaperonin containing TCP1, subunit 7 (eta) [Source:HGNC Symbol;Acc:HGNC:1622]	-0.939236509842322	2.21755218561643e-18	2.33155726338681e-17
ENSG00000114626	ABTB1	80325	ankyrin repeat and BTB (POZ) domain containing 1 [Source:HGNC Symbol;Acc:HGNC:18275]	1.0141486117668	2.22704454306516e-18	2.34029212727635e-17
ENSG00000142089	IFITM3	10410	interferon induced transmembrane protein 3 [Source:HGNC Symbol;Acc:HGNC:5414]	1.62231758755264	2.29233233391636e-18	2.40761922322443e-17
ENSG00000115942	ORC2	4999	origin recognition complex, subunit 2 [Source:HGNC Symbol;Acc:HGNC:8488]	-0.741143002237855	2.33735564351579e-18	2.45360244916567e-17
ENSG00000187650	VMAC	400673	vimentin-type intermediate filament associated coiled-coil protein [Source:HGNC Symbol;Acc:HGNC:33803]	1.91789202347426	2.3559058943778e-18	2.47176191446244e-17
ENSG00000130720	FIBCD1	84929	fibrinogen C domain containing 1 [Source:HGNC Symbol;Acc:HGNC:25922]	1.50401286457452	2.36951484954417e-18	2.48472056091267e-17
ENSG00000089006	SNX5	27131	sorting nexin 5 [Source:HGNC Symbol;Acc:HGNC:14969]	-0.755251078453096	2.38165997763697e-18	2.49613127417485e-17
ENSG00000117305	HMGCL	3155	3-hydroxymethyl-3-methylglutaryl-CoA lyase [Source:HGNC Symbol;Acc:HGNC:5005]	1.06521402356071	2.39063396695791e-18	2.50420809391413e-17
ENSG00000204406	MBD5	55777	methyl-CpG binding domain protein 5 [Source:HGNC Symbol;Acc:HGNC:20444]	1.09356644182819	2.40550138604322e-18	2.51844649616692e-17
ENSG00000166037	CEP57	9702	centrosomal protein 57kDa [Source:HGNC Symbol;Acc:HGNC:30794]	-0.808855745463257	2.41049939988498e-18	2.52234248644744e-17
ENSG00000143870	PDIA6	10130	protein disulfide isomerase family A, member 6 [Source:HGNC Symbol;Acc:HGNC:30168]	-0.880772232834095	2.52465608029431e-18	2.64039732780807e-17
ENSG00000123104	ITPR2	3709	inositol 1,4,5-trisphosphate receptor, type 2 [Source:HGNC Symbol;Acc:HGNC:6181]	1.10669241732384	2.53310887283391e-18	2.64783592019612e-17
ENSG00000133639	BTG1	694	B-cell translocation gene 1, anti-proliferative [Source:HGNC Symbol;Acc:HGNC:1130]	0.696526340195944	2.66174508351893e-18	2.7808268572184e-17
ENSG00000247271	ZBED5-AS1	729013	ZBED5 antisense RNA 1 [Source:HGNC Symbol;Acc:HGNC:48646]	1.08725421520794	2.78060276524273e-18	2.90346660835811e-17
ENSG00000139514	SLC7A1	6541	solute carrier family 7 (cationic amino acid transporter, y+ system), member 1 [Source:HGNC Symbol;Acc:HGNC:11057]	-0.966085634234599	2.85225044231644e-18	2.97670680076089e-17
ENSG00000178718	RPP25	54913	ribonuclease P/MRP 25kDa subunit [Source:HGNC Symbol;Acc:HGNC:30361]	-0.902917348993234	2.86205719772128e-18	2.98536441384275e-17
ENSG00000232956	SNHG15	NA	small nucleolar RNA host gene 15 [Source:HGNC Symbol;Acc:HGNC:27797]	-1.03482423360166	2.89539976340187e-18	3.01854974806161e-17
ENSG00000136933	RABEPK	10244	Rab9 effector protein with kelch motifs [Source:HGNC Symbol;Acc:HGNC:16896]	-0.91272761552106	2.9431297409755e-18	3.06669151702067e-17
ENSG00000156787	TBC1D31	93594	TBC1 domain family, member 31 [Source:HGNC Symbol;Acc:HGNC:30888]	-0.963210572226062	2.96502693832711e-18	3.08787939871325e-17
ENSG00000204217	BMPR2	659	bone morphogenetic protein receptor, type II (serine/threonine kinase) [Source:HGNC Symbol;Acc:HGNC:1078]	0.856924461063132	3.00534650640264e-18	3.12822052584249e-17
ENSG00000157654	PALM2-AKAP2	445815	PALM2-AKAP2 readthrough [Source:HGNC Symbol;Acc:HGNC:33529]	1.33853598961675	3.08103759431429e-18	3.2053174677869e-17
ENSG00000213694	S1PR3	1903	sphingosine-1-phosphate receptor 3 [Source:HGNC Symbol;Acc:HGNC:3167]	0.804428819878712	3.14392226266633e-18	3.26901727480189e-17
ENSG00000101888	NXT2	55916	nuclear transport factor 2-like export factor 2 [Source:HGNC Symbol;Acc:HGNC:18151]	-1.01285391828141	3.17584597297625e-18	3.30047412110041e-17
ENSG00000136261	BZW2	28969	basic leucine zipper and W2 domains 2 [Source:HGNC Symbol;Acc:HGNC:18808]	-0.752512784861991	3.34138685588701e-18	3.4706855270717e-17
ENSG00000148308	GTF3C5	9328	general transcription factor IIIC, polypeptide 5, 63kDa [Source:HGNC Symbol;Acc:HGNC:4668]	-0.806241919243095	3.35490792498902e-18	3.48289863195391e-17
ENSG00000086200	IPO11	51194	importin 11 [Source:HGNC Symbol;Acc:HGNC:20628]	-0.801815831573537	3.39037196882232e-18	3.51786704916249e-17
ENSG00000099337	KCNK6	9424	potassium channel, two pore domain subfamily K, member 6 [Source:HGNC Symbol;Acc:HGNC:6281]	1.04936359297691	3.46198300652825e-18	3.59028536886992e-17
ENSG00000149809	TM7SF2	7108	transmembrane 7 superfamily member 2 [Source:HGNC Symbol;Acc:HGNC:11863]	1.06627543597888	3.51774383574872e-18	3.64619869984531e-17
ENSG00000165264	NDUFB6	4712	NADH dehydrogenase (ubiquinone) 1 beta subcomplex, 6, 17kDa [Source:HGNC Symbol;Acc:HGNC:7701]	-0.797893672415615	3.52867792830452e-18	3.65517232127532e-17
ENSG00000092199	HNRNPC	3183	heterogeneous nuclear ribonucleoprotein C (C1/C2) [Source:HGNC Symbol;Acc:HGNC:5035]	-0.917108696050865	3.53010163443679e-18	3.65517232127532e-17
ENSG00000101333	PLCB4	5332	phospholipase C, beta 4 [Source:HGNC Symbol;Acc:HGNC:9059]	0.789456061600764	3.56994307465706e-18	3.69448901953509e-17
ENSG00000058056	USP13	8975	ubiquitin specific peptidase 13 (isopeptidase T-3) [Source:HGNC Symbol;Acc:HGNC:12611]	-0.914440833901805	3.58269177274857e-18	3.70574129122622e-17
ENSG00000187735	TCEA1	6917	transcription elongation factor A (SII), 1 [Source:HGNC Symbol;Acc:HGNC:11612]	-0.8308287411445	3.64141373980383e-18	3.7645091493231e-17
ENSG00000159763	PIP	5304	prolactin-induced protein [Source:HGNC Symbol;Acc:HGNC:8993]	4.5522635584221	3.70890839548489e-18	3.83228003458156e-17
ENSG00000123636	BAZ2B	29994	bromodomain adjacent to zinc finger domain, 2B [Source:HGNC Symbol;Acc:HGNC:963]	0.820118005589369	3.78466748859709e-18	3.90851494535934e-17
ENSG00000172531	PPP1CA	5499	protein phosphatase 1, catalytic subunit, alpha isozyme [Source:HGNC Symbol;Acc:HGNC:9281]	-0.827757403058186	3.81139336906473e-18	3.93405890278176e-17
ENSG00000137492	PRKRIR	5612	protein-kinase, interferon-inducible double stranded RNA dependent inhibitor, repressor of (P58 repressor) [Source:HGNC Symbol;Acc:HGNC:9440]	-0.802889662331585	3.8672955179617e-18	3.9896757312194e-17
ENSG00000147586	MRPS28	28957	mitochondrial ribosomal protein S28 [Source:HGNC Symbol;Acc:HGNC:14513]	-0.8277540444397	4.01515618892959e-18	4.1400535317585e-17
ENSG00000174013	FBXO45	200933	F-box protein 45 [Source:HGNC Symbol;Acc:HGNC:29148]	-1.02851662189823	4.04570763436003e-18	4.16937923966702e-17
ENSG00000134987	WDR36	134430	WD repeat domain 36 [Source:HGNC Symbol;Acc:HGNC:30696]	-0.732369675901106	4.18032404991277e-18	4.30586454275686e-17
ENSG00000181513	ACBD4	79777	acyl-CoA binding domain containing 4 [Source:HGNC Symbol;Acc:HGNC:23337]	0.877772998910139	4.22313428290534e-18	4.34769363695038e-17
ENSG00000151176	PLBD2	196463	phospholipase B domain containing 2 [Source:HGNC Symbol;Acc:HGNC:27283]	1.0393538020072	4.28899126652741e-18	4.41319330528727e-17
ENSG00000126067	PSMB2	5690	proteasome (prosome, macropain) subunit, beta type, 2 [Source:HGNC Symbol;Acc:HGNC:9539]	-0.818148374096375	4.57935846400633e-18	4.70951617984951e-17
ENSG00000243207	PPAN-P2RY11	692312	PPAN-P2RY11 readthrough [Source:HGNC Symbol;Acc:HGNC:33526]	-0.92333457558654	4.61643790679279e-18	4.74517935934435e-17
ENSG00000134569	LRP4	4038	low density lipoprotein receptor-related protein 4 [Source:HGNC Symbol;Acc:HGNC:6696]	0.871606361707297	4.65198782162649e-18	4.77923408237404e-17
ENSG00000100154	TTC28	23331	tetratricopeptide repeat domain 28 [Source:HGNC Symbol;Acc:HGNC:29179]	0.780176491772453	4.7197711894034e-18	4.84635133148927e-17
ENSG00000172301	COPRS	55352	coordinator of PRMT5, differentiation stimulator [Source:HGNC Symbol;Acc:HGNC:28848]	-0.964243138365235	4.8521038819984e-18	4.97964489832522e-17
ENSG00000174080	CTSF	8722	cathepsin F [Source:HGNC Symbol;Acc:HGNC:2531]	0.842720364186235	4.88242002667226e-18	5.0081562848877e-17
ENSG00000214736	TOMM6	100188893	translocase of outer mitochondrial membrane 6 homolog (yeast) [Source:HGNC Symbol;Acc:HGNC:34528]	-0.897252497357933	4.99054513730035e-18	5.11640943085136e-17
ENSG00000245694	CRNDE	NA	colorectal neoplasia differentially expressed (non-protein coding) [Source:HGNC Symbol;Acc:HGNC:37078]	-1.20236890924256	5.035919485068e-18	5.1602502773342e-17
ENSG00000175110	MRPS22	56945	mitochondrial ribosomal protein S22 [Source:HGNC Symbol;Acc:HGNC:14508]	-0.843930490934271	5.19051699422849e-18	5.31590739958414e-17
ENSG00000134375	TIMM17A	10440	translocase of inner mitochondrial membrane 17 homolog A (yeast) [Source:HGNC Symbol;Acc:HGNC:17315]	-0.753297553232392	5.20046268105702e-18	5.32333371642292e-17
ENSG00000273542	HIST1H4K	8362	histone cluster 1, H4k [Source:HGNC Symbol;Acc:HGNC:4784]	-2.48787658249477	5.22331559474464e-18	5.34395768460773e-17
ENSG00000090861	AARS	16	alanyl-tRNA synthetase [Source:HGNC Symbol;Acc:HGNC:20]	-0.858895291403604	5.22943260043401e-18	5.34744671087858e-17
ENSG00000184347	SLIT3	6586	slit homolog 3 (Drosophila) [Source:HGNC Symbol;Acc:HGNC:11087]	1.09667316313378	5.25305579627422e-18	5.36688681440539e-17
ENSG00000155304	HSPA13	6782	heat shock protein 70kDa family, member 13 [Source:HGNC Symbol;Acc:HGNC:11375]	-0.745436973440615	5.25387684706419e-18	5.36688681440539e-17
ENSG00000197713	RPE	6120	ribulose-5-phosphate-3-epimerase [Source:HGNC Symbol;Acc:HGNC:10293]	-0.720903967766182	5.30364939236356e-18	5.41493009796043e-17
ENSG00000130227	XPO7	23039	exportin 7 [Source:HGNC Symbol;Acc:HGNC:14108]	-0.76239891828945	5.34272167310258e-18	5.45200461641604e-17
ENSG00000214223	HNRNPA1P10	NA	heterogeneous nuclear ribonucleoprotein A1 pseudogene 10 [Source:HGNC Symbol;Acc:HGNC:39128]	-0.993113702263543	5.41751492691057e-18	5.52547366525789e-17
ENSG00000182010	RTKN2	219790	rhotekin 2 [Source:HGNC Symbol;Acc:HGNC:19364]	-1.52784951355118	5.44119070492568e-18	5.54675766597068e-17
ENSG00000185238	PRMT3	10196	protein arginine methyltransferase 3 [Source:HGNC Symbol;Acc:HGNC:30163]	-0.868316584599243	5.48839385745353e-18	5.59199118348901e-17
ENSG00000001630	CYP51A1	1595	cytochrome P450, family 51, subfamily A, polypeptide 1 [Source:HGNC Symbol;Acc:HGNC:2649]	-0.793391827494659	5.6171718133857e-18	5.72024981161071e-17
ENSG00000184995	IFNE	338376	interferon, epsilon [Source:HGNC Symbol;Acc:HGNC:18163]	1.77220938846541	5.63277774311397e-18	5.73318686723131e-17
ENSG00000078081	LAMP3	27074	lysosomal-associated membrane protein 3 [Source:HGNC Symbol;Acc:HGNC:14582]	3.54844400844363	5.67221198153575e-18	5.7703511795685e-17
ENSG00000116221	MRPL37	51253	mitochondrial ribosomal protein L37 [Source:HGNC Symbol;Acc:HGNC:14034]	-0.909720093967768	5.73667558336904e-18	5.83292654786612e-17
ENSG00000165124	SVEP1	79987	sushi, von Willebrand factor type A, EGF and pentraxin domain containing 1 [Source:HGNC Symbol;Acc:HGNC:15985]	1.95543055871439	5.78766779915473e-18	5.88174717284469e-17
ENSG00000151117	TMEM86A	144110	transmembrane protein 86A [Source:HGNC Symbol;Acc:HGNC:26890]	2.54250623361436	5.79594961858954e-18	5.88713525269177e-17
ENSG00000175567	UCP2	7351	uncoupling protein 2 (mitochondrial, proton carrier) [Source:HGNC Symbol;Acc:HGNC:12518]	1.13404456602325	5.81939774921892e-18	5.90791479617518e-17
ENSG00000134758	RNF138	51444	ring finger protein 138, E3 ubiquitin protein ligase [Source:HGNC Symbol;Acc:HGNC:17765]	-0.993563701386815	5.84873399020809e-18	5.93464759684391e-17
ENSG00000135709	KIAA0513	9764	KIAA0513 [Source:HGNC Symbol;Acc:HGNC:29058]	0.91036580967952	6.06197826714434e-18	6.14786666559054e-17
ENSG00000109079	TNFAIP1	7126	tumor necrosis factor, alpha-induced protein 1 (endothelial) [Source:HGNC Symbol;Acc:HGNC:11894]	0.783988663661168	6.13666537655097e-18	6.22041873674402e-17
ENSG00000101849	TBL1X	6907	transducin (beta)-like 1X-linked [Source:HGNC Symbol;Acc:HGNC:11585]	-0.938312198638962	6.17848972327501e-18	6.25960220374467e-17
ENSG00000121644	DESI2	51029	desumoylating isopeptidase 2 [Source:HGNC Symbol;Acc:HGNC:24264]	-0.799757840928377	6.28331906069108e-18	6.36254491865776e-17
ENSG00000181218	HIST3H2A	92815	histone cluster 3, H2a [Source:HGNC Symbol;Acc:HGNC:20507]	-1.739739156418	6.32493262513502e-18	6.40140209744711e-17
ENSG00000119938	PPP1R3C	5507	protein phosphatase 1, regulatory subunit 3C [Source:HGNC Symbol;Acc:HGNC:9293]	0.877697041227849	6.40649381132587e-18	6.4806293771917e-17
ENSG00000114450	GNB4	59345	guanine nucleotide binding protein (G protein), beta polypeptide 4 [Source:HGNC Symbol;Acc:HGNC:20731]	-0.886825450556472	6.4169409957915e-18	6.48787545101622e-17
ENSG00000177192	PUS1	80324	pseudouridylate synthase 1 [Source:HGNC Symbol;Acc:HGNC:15508]	-0.788621663619219	6.50559620809137e-18	6.57414622440169e-17
ENSG00000133466	C1QTNF6	114904	C1q and tumor necrosis factor related protein 6 [Source:HGNC Symbol;Acc:HGNC:14343]	0.852038368966112	6.61251534306488e-18	6.67877572175817e-17
ENSG00000240087		NA		-0.887723860786309	6.70981640277538e-18	6.77358880190243e-17
ENSG00000184489	PTP4A3	11156	protein tyrosine phosphatase type IVA, member 3 [Source:HGNC Symbol;Acc:HGNC:9636]	1.56157921708406	6.76077652152887e-18	6.82154754644149e-17
ENSG00000115295	CLIP4	79745	CAP-GLY domain containing linker protein family, member 4 [Source:HGNC Symbol;Acc:HGNC:26108]	0.738714707566597	6.92267324213627e-18	6.98133397507117e-17
ENSG00000101255	TRIB3	57761	tribbles pseudokinase 3 [Source:HGNC Symbol;Acc:HGNC:16228]	-0.946954964794493	7.28355016737398e-18	7.34152128095104e-17
ENSG00000158486	DNAH3	55567	dynein, axonemal, heavy chain 3 [Source:HGNC Symbol;Acc:HGNC:2949]	1.97690496360097	7.30755807526278e-18	7.36196416802099e-17
ENSG00000278715	SNORD116-20	NA	small nucleolar RNA, C/D box 116-20 [Source:HGNC Symbol;Acc:HGNC:33086]	1.36932731457544	7.35254372629583e-18	7.40350937088177e-17
ENSG00000104936	DMPK	1760	dystrophia myotonica-protein kinase [Source:HGNC Symbol;Acc:HGNC:2933]	0.758636288221859	7.47987414195097e-18	7.52788556028444e-17
ENSG00000136270	TBRG4	9238	transforming growth factor beta regulator 4 [Source:HGNC Symbol;Acc:HGNC:17443]	-0.826832976179378	7.56882986472719e-18	7.61353374783861e-17
ENSG00000105722	ERF	2077	Ets2 repressor factor [Source:HGNC Symbol;Acc:HGNC:3444]	-0.780073667158588	7.57312391343737e-18	7.61397638849204e-17
ENSG00000110237	ARHGEF17	9828	Rho guanine nucleotide exchange factor (GEF) 17 [Source:HGNC Symbol;Acc:HGNC:21726]	0.919844355605616	7.60241406934782e-18	7.63953674232124e-17
ENSG00000100304	TTLL12	23170	tubulin tyrosine ligase-like family member 12 [Source:HGNC Symbol;Acc:HGNC:28974]	-1.01088379237572	7.83337245358983e-18	7.86762105709815e-17
ENSG00000167085	PHB	5245	prohibitin [Source:HGNC Symbol;Acc:HGNC:8912]	-0.858840350563679	7.90622042905539e-18	7.93675258111882e-17
ENSG00000025708	TYMP	1890	thymidine phosphorylase [Source:HGNC Symbol;Acc:HGNC:3148]	1.68805533447057	7.92512836410068e-18	7.95169304018146e-17
ENSG00000114374	USP9Y	8287	ubiquitin specific peptidase 9, Y-linked [Source:HGNC Symbol;Acc:HGNC:12633]	0.802872033875541	8.01828875921947e-18	8.04108186432182e-17
ENSG00000105246	EBI3	10148	Epstein-Barr virus induced 3 [Source:HGNC Symbol;Acc:HGNC:3129]	2.28523984105882	8.29694940060293e-18	8.31631315871697e-17
ENSG00000113504	SLC12A7	10723	solute carrier family 12 (potassium/chloride transporter), member 7 [Source:HGNC Symbol;Acc:HGNC:10915]	0.847490427529935	8.74103757669597e-18	8.75699484610576e-17
ENSG00000166396	SERPINB7	8710	serpin peptidase inhibitor, clade B (ovalbumin), member 7 [Source:HGNC Symbol;Acc:HGNC:13902]	2.15183185983121	8.78342265927715e-18	8.79499736729242e-17
ENSG00000150768	DLAT	1737	dihydrolipoamide S-acetyltransferase [Source:HGNC Symbol;Acc:HGNC:2896]	-0.777672838912055	8.79054488243832e-18	8.79766994414648e-17
ENSG00000271936		NA		-1.90050952338008	8.97454607747852e-18	8.97727252185649e-17
ENSG00000101187	SLCO4A1	28231	solute carrier organic anion transporter family, member 4A1 [Source:HGNC Symbol;Acc:HGNC:10953]	-1.44583721551882	9.17885026302173e-18	9.17699219616687e-17
ENSG00000163938	GNL3	26354	guanine nucleotide binding protein-like 3 (nucleolar) [Source:HGNC Symbol;Acc:HGNC:29931]	-0.710339900303643	9.298560854997e-18	9.29197613815482e-17
ENSG00000134825	TMEM258	746	transmembrane protein 258 [Source:HGNC Symbol;Acc:HGNC:1164]	-0.831834515911211	9.39011294532067e-18	9.37871948168631e-17
ENSG00000152484	USP12	219333	ubiquitin specific peptidase 12 [Source:HGNC Symbol;Acc:HGNC:20485]	-0.980780687504632	9.86589618653801e-18	9.84894618803663e-17
ENSG00000105287	PRKD2	25865	protein kinase D2 [Source:HGNC Symbol;Acc:HGNC:17293]	0.776641573792726	9.89500506521756e-18	9.87301616507264e-17
ENSG00000163009	C2orf48	NA	chromosome 2 open reading frame 48 [Source:HGNC Symbol;Acc:HGNC:26322]	-2.95260180026862	1.00297665743374e-17	9.99915854927101e-17
ENSG00000118363	SPCS2	9789	signal peptidase complex subunit 2 homolog (S. cerevisiae) [Source:HGNC Symbol;Acc:HGNC:28962]	-0.816017884239355	1.00315510450775e-17	9.99915854927101e-17
ENSG00000106105	GARS	2617	glycyl-tRNA synthetase [Source:HGNC Symbol;Acc:HGNC:4162]	-0.815939565319749	1.0081330836563e-17	1.00437101365174e-16
ENSG00000166965	RCCD1	91433	RCC1 domain containing 1 [Source:HGNC Symbol;Acc:HGNC:30457]	-0.803015787372987	1.02075752602123e-17	1.0164357703667e-16
ENSG00000171552	BCL2L1	598	BCL2-like 1 [Source:HGNC Symbol;Acc:HGNC:992]	0.806506283671308	1.0235196831679e-17	1.01867278895038e-16
ENSG00000257046		NA	Uncharacterized protein [Source:UniProtKB/TrEMBL;Acc:F5H094]	0.774256672495831	1.03734181114415e-17	1.03190960830633e-16
ENSG00000099953	MMP11	4320	matrix metallopeptidase 11 [Source:HGNC Symbol;Acc:HGNC:7157]	2.96324532418127	1.04016183633835e-17	1.03419412373933e-16
ENSG00000184887	BTBD6	90135	BTB (POZ) domain containing 6 [Source:HGNC Symbol;Acc:HGNC:19897]	-0.896462784860378	1.04543978954911e-17	1.03891893774307e-16
ENSG00000105341	ATP5SL	55101	ATP5S-like [Source:HGNC Symbol;Acc:HGNC:25496]	-0.820387674210996	1.06489502523976e-17	1.05772077016775e-16
ENSG00000110104	CCDC86	79080	coiled-coil domain containing 86 [Source:HGNC Symbol;Acc:HGNC:28359]	-1.08826897878131	1.08068137852036e-17	1.07286137256523e-16
ENSG00000171490	RSL1D1	26156	ribosomal L1 domain containing 1 [Source:HGNC Symbol;Acc:HGNC:24534]	-0.757301115834583	1.11607425245584e-17	1.10744163392856e-16
ENSG00000185634	SHC4	399694	SHC (Src homology 2 domain containing) family, member 4 [Source:HGNC Symbol;Acc:HGNC:16743]	2.58370998282423	1.13591229895939e-17	1.12619547882482e-16
ENSG00000203667	COX20	116228	COX20 cytochrome c oxidase assembly factor [Source:HGNC Symbol;Acc:HGNC:26970]	-0.785572485406069	1.13611439020949e-17	1.12619547882482e-16
ENSG00000119285	HEATR1	55127	HEAT repeat containing 1 [Source:HGNC Symbol;Acc:HGNC:25517]	-0.818113111747496	1.143564911955e-17	1.13301245740135e-16
ENSG00000106665	CLIP2	7461	CAP-GLY domain containing linker protein 2 [Source:HGNC Symbol;Acc:HGNC:2586]	0.738306874506843	1.14856646646032e-17	1.13739744919249e-16
ENSG00000150593	PDCD4	27250	programmed cell death 4 (neoplastic transformation inhibitor) [Source:HGNC Symbol;Acc:HGNC:8763]	0.851225167344597	1.18075824756537e-17	1.16869037770048e-16
ENSG00000130309	COLGALT1	79709	collagen beta(1-O)galactosyltransferase 1 [Source:HGNC Symbol;Acc:HGNC:26182]	-0.762519758253422	1.2303728325714e-17	1.2171880661132e-16
ENSG00000188312	CENPP	401541	centromere protein P [Source:HGNC Symbol;Acc:HGNC:32933]	-1.28357834296516	1.23425732395936e-17	1.22041980441147e-16
ENSG00000077942	FBLN1	2192	fibulin 1 [Source:HGNC Symbol;Acc:HGNC:3600]	-0.89104192445195	1.27948966563457e-17	1.26451214778772e-16
[truncated: 17,757 more rows]

## Sheet: FaDu
Ensembl gene ID	HGNC gene symbol	Entez gene ID	Description	Log2 fold-change	Raw P	FDR
ENSG00000149968	MMP3	4314	matrix metallopeptidase 3 [Source:HGNC Symbol;Acc:HGNC:7173]	5.35648354232128	3.46900936034165e-68	6.00103929245502e-64
ENSG00000115602	IL1RL1	9173	interleukin 1 receptor-like 1 [Source:HGNC Symbol;Acc:HGNC:5998]	4.29765249726468	6.19645377666003e-64	5.35962269412209e-60
ENSG00000135318	NT5E	4907	5'-nucleotidase, ecto (CD73) [Source:HGNC Symbol;Acc:HGNC:8021]	3.60338366486565	1.30902423565861e-62	7.54827008421945e-59
ENSG00000170477	KRT4	3851	keratin 4, type II [Source:HGNC Symbol;Acc:HGNC:6441]	-4.73193684997973	9.68390442961976e-62	4.18804656819981e-58
ENSG00000165799	RNASE7	84659	ribonuclease, RNase A family, 7 [Source:HGNC Symbol;Acc:HGNC:19278]	4.44156417288942	4.63398960448289e-56	1.60326772335899e-52
ENSG00000073756	PTGS2	5743	prostaglandin-endoperoxide synthase 2 (prostaglandin G/H synthase and cyclooxygenase) [Source:HGNC Symbol;Acc:HGNC:9605]	3.57504477103599	1.60850298375551e-55	4.63758218599776e-52
ENSG00000113070	HBEGF	1839	heparin-binding EGF-like growth factor [Source:HGNC Symbol;Acc:HGNC:3059]	3.71452714550241	5.62906160134998e-55	1.39110195202505e-51
ENSG00000134070	IRAK2	3656	interleukin-1 receptor-associated kinase 2 [Source:HGNC Symbol;Acc:HGNC:6113]	4.17118222375769	1.80342907614534e-54	3.89968994852978e-51
ENSG00000095752	IL11	3589	interleukin 11 [Source:HGNC Symbol;Acc:HGNC:5966]	4.71024152779103	7.05915999126534e-51	1.35684898543221e-47
ENSG00000124610	HIST1H1A	3024	histone cluster 1, H1a [Source:HGNC Symbol;Acc:HGNC:4715]	-3.0216069859613	4.09063971471673e-47	7.07639764248848e-44
ENSG00000115590	IL1R2	7850	interleukin 1 receptor, type II [Source:HGNC Symbol;Acc:HGNC:5994]	4.59393753394025	1.21894829841623e-46	1.91696241948203e-43
ENSG00000167723	TRPV3	162514	transient receptor potential cation channel, subfamily V, member 3 [Source:HGNC Symbol;Acc:HGNC:18084]	4.51461030268625	1.82666292953847e-45	2.63328683484049e-42
ENSG00000136167	LCP1	3936	lymphocyte cytosolic protein 1 (L-plastin) [Source:HGNC Symbol;Acc:HGNC:6528]	2.900715428307	1.33770173785537e-43	1.78006941255078e-40
ENSG00000130203	APOE	348	apolipoprotein E [Source:HGNC Symbol;Acc:HGNC:613]	5.68396671765236	8.98680760487763e-42	1.11044846254841e-38
ENSG00000022267	FHL1	2273	four and a half LIM domains 1 [Source:HGNC Symbol;Acc:HGNC:3702]	3.48156513852617	1.46233032272777e-41	1.68645681685784e-38
ENSG00000162892	IL24	11009	interleukin 24 [Source:HGNC Symbol;Acc:HGNC:11346]	2.9103680691732	3.6867932255819e-41	3.98611475058383e-38
ENSG00000166670	MMP10	4319	matrix metallopeptidase 10 [Source:HGNC Symbol;Acc:HGNC:7156]	3.02611635658209	7.81526769258326e-41	7.95272445964693e-38
ENSG00000163739	CXCL1	2919	chemokine (C-X-C motif) ligand 1 (melanoma growth stimulating activity, alpha) [Source:HGNC Symbol;Acc:HGNC:4602]	3.12503160947522	7.17318843079251e-38	6.89383259245998e-35
ENSG00000162511	LAPTM5	7805	lysosomal protein transmembrane 5 [Source:HGNC Symbol;Acc:HGNC:29612]	4.39523885061233	7.73425722889389e-38	7.04183767382292e-35
ENSG00000130508	PXDN	7837	peroxidasin [Source:HGNC Symbol;Acc:HGNC:14966]	3.38318348117714	2.60649859712087e-37	2.2544909615797e-34
ENSG00000196611	MMP1	4312	matrix metallopeptidase 1 [Source:HGNC Symbol;Acc:HGNC:7155]	2.72266669277536	1.71196014701211e-36	1.41024755157917e-33
ENSG00000179046	TRIML2	205860	tripartite motif family-like 2 [Source:HGNC Symbol;Acc:HGNC:26378]	3.95071049173909	2.12351562319892e-34	1.66975894389628e-31
ENSG00000124762	CDKN1A	1026	cyclin-dependent kinase inhibitor 1A (p21, Cip1) [Source:HGNC Symbol;Acc:HGNC:1784]	3.04469826938635	7.03400109577351e-34	5.29048630242547e-31
ENSG00000181634	TNFSF15	9966	tumor necrosis factor (ligand) superfamily, member 15 [Source:HGNC Symbol;Acc:HGNC:11931]	3.40832493156464	6.16434305093688e-33	4.4413828177092e-30
ENSG00000049249	TNFRSF9	3604	tumor necrosis factor receptor superfamily, member 9 [Source:HGNC Symbol;Acc:HGNC:11924]	3.68086520791478	6.41855427728366e-33	4.4413828177092e-30
ENSG00000164484	TMEM200A	114801	transmembrane protein 200A [Source:HGNC Symbol;Acc:HGNC:21075]	3.61867951507563	1.84050719321592e-32	1.22457438213239e-29
ENSG00000048052	HDAC9	9734	histone deacetylase 9 [Source:HGNC Symbol;Acc:HGNC:14065]	3.19802300351755	4.59110078485333e-32	2.94153527693251e-29
ENSG00000163131	CTSS	1520	cathepsin S [Source:HGNC Symbol;Acc:HGNC:2545]	2.86864852930264	5.13972639398766e-31	3.17543310319973e-28
ENSG00000011422	PLAUR	5329	plasminogen activator, urokinase receptor [Source:HGNC Symbol;Acc:HGNC:9053]	2.80697735360727	8.54110741178508e-31	5.09491783160242e-28
ENSG00000281162	LINC01127	NA	long intergenic non-protein coding RNA 1127 [Source:HGNC Symbol;Acc:HGNC:49292]	4.21709953456073	2.38666881444254e-30	1.37623279403472e-27
ENSG00000226145	KRT16P6	NA	keratin 16 pseudogene 6 [Source:HGNC Symbol;Acc:HGNC:50719]	3.13694931579699	9.54916930301549e-30	5.32874450880209e-27
ENSG00000019186	CYP24A1	1591	cytochrome P450, family 24, subfamily A, polypeptide 1 [Source:HGNC Symbol;Acc:HGNC:2602]	2.63552548750333	3.5327015249251e-29	1.90975636498998e-26
ENSG00000127954	STEAP4	79689	STEAP family member 4 [Source:HGNC Symbol;Acc:HGNC:21923]	3.40499231552063	4.57554182688083e-29	2.39855448676398e-26
ENSG00000151651	ADAM8	101	ADAM metallopeptidase domain 8 [Source:HGNC Symbol;Acc:HGNC:215]	2.70985132807321	8.31355482466738e-29	4.22988779152709e-26
ENSG00000164171	ITGA2	3673	integrin, alpha 2 (CD49B, alpha 2 subunit of VLA-2 receptor) [Source:HGNC Symbol;Acc:HGNC:6137]	2.22385495494205	1.79164368827422e-28	8.85532690384452e-26
ENSG00000131016	AKAP12	9590	A kinase (PRKA) anchor protein 12 [Source:HGNC Symbol;Acc:HGNC:370]	2.29346234438714	1.9652461853615e-27	9.44355382238016e-25
ENSG00000114771	AADAC	13	arylacetamide deacetylase [Source:HGNC Symbol;Acc:HGNC:17]	3.1449029450989	4.15303879295214e-27	1.94171400214268e-24
ENSG00000160712	IL6R	3570	interleukin 6 receptor [Source:HGNC Symbol;Acc:HGNC:6019]	2.63411226167607	4.4339783372611e-27	2.01851029621789e-24
ENSG00000268873		NA		5.75554930252768	5.74153972350619e-27	2.54674091479317e-24
ENSG00000165949	IFI27	3429	interferon, alpha-inducible protein 27 [Source:HGNC Symbol;Acc:HGNC:5397]	3.09397279236242	6.40014818579044e-27	2.76790408664972e-24
ENSG00000135074	ADAM19	8728	ADAM metallopeptidase domain 19 [Source:HGNC Symbol;Acc:HGNC:197]	2.82601697701172	1.76792507113061e-26	7.45935019646058e-24
ENSG00000273703	HIST1H2BM	8342	histone cluster 1, H2bm [Source:HGNC Symbol;Acc:HGNC:4750]	-2.2585415965248	1.98988449307356e-26	8.19595520135228e-24
ENSG00000116701	NCF2	4688	neutrophil cytosolic factor 2 [Source:HGNC Symbol;Acc:HGNC:7661]	3.45630268240243	3.08266146152868e-26	1.24016187495313e-23
ENSG00000278828	HIST1H3H	8357	histone cluster 1, H3h [Source:HGNC Symbol;Acc:HGNC:4775]	-2.11074171488733	3.24047889987587e-26	1.27402373838529e-23
ENSG00000065809	FAM107B	83641	family with sequence similarity 107, member B [Source:HGNC Symbol;Acc:HGNC:23726]	2.6318641466121	3.6067896881434e-26	1.38653010700428e-23
ENSG00000140450	ARRDC4	91947	arrestin domain containing 4 [Source:HGNC Symbol;Acc:HGNC:28087]	2.50605210188913	3.96522182940305e-26	1.4911820092792e-23
ENSG00000276180	HIST1H4I	8294	histone cluster 1, H4i [Source:HGNC Symbol;Acc:HGNC:4793]	-2.33391223682197	5.9638708873883e-26	2.19508515916873e-23
ENSG00000124575	HIST1H1D	3007	histone cluster 1, H1d [Source:HGNC Symbol;Acc:HGNC:4717]	-2.53361574269502	1.14732191558589e-25	4.13490037869173e-23
ENSG00000164400	CSF2	1437	colony stimulating factor 2 (granulocyte-macrophage) [Source:HGNC Symbol;Acc:HGNC:2434]	4.98874869479457	1.52206119463699e-25	5.37349726653577e-23
ENSG00000237499		100130476		3.3767811950095	1.93285545921688e-25	6.68729331779858e-23
ENSG00000076706	MCAM	4162	melanoma cell adhesion molecule [Source:HGNC Symbol;Acc:HGNC:6934]	3.63100670033332	2.05625035931722e-25	6.97472058153502e-23
ENSG00000197142	ACSL5	51703	acyl-CoA synthetase long-chain family member 5 [Source:HGNC Symbol;Acc:HGNC:16526]	3.15487650007616	2.9513801122054e-25	9.81844703096948e-23
ENSG00000274290	HIST1H2BE	8344	histone cluster 1, H2be [Source:HGNC Symbol;Acc:HGNC:4753]	-2.2193947351575	3.08855545237677e-25	1.00809284472954e-22
ENSG00000277157	HIST1H4D	8360	histone cluster 1, H4d [Source:HGNC Symbol;Acc:HGNC:4782]	-2.06164219103508	3.24003011272231e-25	1.03794964666636e-22
ENSG00000180638	SLC47A2	146802	solute carrier family 47 (multidrug and toxin extrusion), member 2 [Source:HGNC Symbol;Acc:HGNC:26439]	-2.95983737492951	5.00797073563350e-25	1.5751433773768e-22
ENSG00000169429	CXCL8	3576	chemokine (C-X-C motif) ligand 8 [Source:HGNC Symbol;Acc:HGNC:6025]	2.98694546385838	5.50504940476362e-25	1.70056874380368e-22
ENSG00000029534	ANK1	286	ankyrin 1, erythrocytic [Source:HGNC Symbol;Acc:HGNC:492]	-2.5473363523135	6.70532416685652e-25	2.03500706600791e-22
ENSG00000250271		NA		3.23653560496338	9.20663727804862e-25	2.73922254391192e-22
ENSG00000183760		390928	Iron/zinc purple acid phosphatase-like protein [Source:UniProtKB/Swiss-Prot;Acc:Q6ZNF0]	3.46219252017834	9.34239725364491e-25	2.73922254391192e-22
ENSG00000138623	SEMA7A	8482	semaphorin 7A, GPI membrane anchor (John Milton Hagen blood group) [Source:HGNC Symbol;Acc:HGNC:10741]	3.48237971530931	1.35670077471729e-24	3.91159445030573e-22
ENSG00000227507	LTB	4050	lymphotoxin beta (TNF superfamily, member 3) [Source:HGNC Symbol;Acc:HGNC:6711]	4.6533653039714	1.97175651562144e-24	5.59170753503856e-22
ENSG00000196352	CD55	1604	CD55 molecule, decay accelerating factor for complement (Cromer blood group) [Source:HGNC Symbol;Acc:HGNC:2665]	2.10379439590639	2.47225880937701e-24	6.89800082958273e-22
ENSG00000275714	HIST1H3A	8350	histone cluster 1, H3a [Source:HGNC Symbol;Acc:HGNC:4766]	-2.04234735739608	3.60422557119784e-24	9.89674573907165e-22
ENSG00000117594	HSD11B1	3290	hydroxysteroid (11-beta) dehydrogenase 1 [Source:HGNC Symbol;Acc:HGNC:5208]	7.1742393003328	4.85222585750518e-24	1.31154148607785e-21
ENSG00000166750	SLFN5	162394	schlafen family member 5 [Source:HGNC Symbol;Acc:HGNC:28286]	2.04890793005133	5.11804347131588e-24	1.36210821554297e-21
ENSG00000070190	DAPP1	27071	dual adaptor of phosphotyrosine and 3-phosphoinositides [Source:HGNC Symbol;Acc:HGNC:16500]	2.55149122208009	9.84934768110791e-24	2.58157372023463e-21
ENSG00000240602	AADACP1	201651	arylacetamide deacetylase pseudogene 1 [Source:HGNC Symbol;Acc:HGNC:50305]	2.08092736849698	2.17801829396209e-23	5.6235132040672e-21
ENSG00000180353	HCLS1	3059	hematopoietic cell-specific Lyn substrate 1 [Source:HGNC Symbol;Acc:HGNC:4844]	3.37745293445324	4.6167001594417e-23	1.17447494203209e-20
ENSG00000090339	ICAM1	3383	intercellular adhesion molecule 1 [Source:HGNC Symbol;Acc:HGNC:5344]	2.23176373197734	4.75423982091453e-23	1.19193615452175e-20
ENSG00000172183	ISG20	3669	interferon stimulated exonuclease gene 20kDa [Source:HGNC Symbol;Acc:HGNC:6130]	3.34536620890678	4.97819411812823e-23	1.23025400070715e-20
ENSG00000212901	KRTAP3-1	83896	keratin associated protein 3-1 [Source:HGNC Symbol;Acc:HGNC:16778]	9.47519655480495	6.63413339927861e-23	1.61639258695945e-20
ENSG00000168685	IL7R	3575	interleukin 7 receptor [Source:HGNC Symbol;Acc:HGNC:6024]	1.96208579823089	7.32572948797875e-23	1.76010825572978e-20
ENSG00000162711	NLRP3	114548	NLR family, pyrin domain containing 3 [Source:HGNC Symbol;Acc:HGNC:16400]	4.44345291637141	1.02523593682238e-22	2.42952828371101e-20
ENSG00000274750	HIST1H3E	8353	histone cluster 1, H3e [Source:HGNC Symbol;Acc:HGNC:4769]	-2.04557012957814	1.22166495958394e-22	2.85588947781656e-20
ENSG00000189221	MAOA	4128	monoamine oxidase A [Source:HGNC Symbol;Acc:HGNC:6833]	3.52267739865222	1.44084242025578e-22	3.32335107040064e-20
ENSG00000116741	RGS2	5997	regulator of G-protein signaling 2 [Source:HGNC Symbol;Acc:HGNC:9998]	2.8081617407341	2.05229302325309e-22	4.67139697490201e-20
ENSG00000163297	ANTXR2	118429	anthrax toxin receptor 2 [Source:HGNC Symbol;Acc:HGNC:21732]	2.60487965538637	2.54956585576601e-22	5.72791425180471e-20
ENSG00000197409	HIST1H3D	8351	histone cluster 1, H3d [Source:HGNC Symbol;Acc:HGNC:4767]	-2.47444970683617	4.33511942813173e-22	9.61451679323728e-20
ENSG00000257219		NA		4.48384247930795	5.32677130530656e-22	1.16642806089238e-19
ENSG00000105825	TFPI2	7980	tissue factor pathway inhibitor 2 [Source:HGNC Symbol;Acc:HGNC:11761]	1.88100703071266	1.1181449181104e-21	2.41784861729897e-19
ENSG00000176170	SPHK1	8877	sphingosine kinase 1 [Source:HGNC Symbol;Acc:HGNC:11240]	2.42275846057055	1.28113304711279e-21	2.73608896074125e-19
ENSG00000165029	ABCA1	19	ATP-binding cassette, sub-family A (ABC1), member 1 [Source:HGNC Symbol;Acc:HGNC:29]	2.48199202264972	1.51389994490958e-21	3.18877866313266e-19
ENSG00000122861	PLAU	5328	plasminogen activator, urokinase [Source:HGNC Symbol;Acc:HGNC:9052]	2.08052608768449	1.52996490571716e-21	3.18877866313266e-19
ENSG00000148346	LCN2	3934	lipocalin 2 [Source:HGNC Symbol;Acc:HGNC:6526]	2.9447346698426	2.03931733856799e-21	4.19977983808187e-19
ENSG00000186081	KRT5	3852	keratin 5, type II [Source:HGNC Symbol;Acc:HGNC:6442]	-2.82650896691323	2.54984317368464e-21	5.18938083077302e-19
ENSG00000274267	HIST1H3B	8358	histone cluster 1, H3b [Source:HGNC Symbol;Acc:HGNC:4776]	-1.85844645639043	2.76703145460188e-21	5.56591594571604e-19
ENSG00000184357	HIST1H1B	3009	histone cluster 1, H1b [Source:HGNC Symbol;Acc:HGNC:4719]	-2.22931757316072	2.93947639012426e-21	5.82227130604144e-19
ENSG00000130707	ASS1	445	argininosuccinate synthase 1 [Source:HGNC Symbol;Acc:HGNC:758]	2.07580835811002	2.96178897584627e-21	5.82227130604144e-19
ENSG00000278588	HIST1H2BI	8346	histone cluster 1, H2bi [Source:HGNC Symbol;Acc:HGNC:4756]	-2.14646089756918	5.0770179451703e-21	9.86823971162933e-19
ENSG00000118503	TNFAIP3	7128	tumor necrosis factor, alpha-induced protein 3 [Source:HGNC Symbol;Acc:HGNC:11896]	2.66078113128946	8.31500860350154e-21	1.59823704257748e-18
ENSG00000128591	FLNC	2318	filamin C, gamma [Source:HGNC Symbol;Acc:HGNC:3756]	2.99303156442427	1.00215250258598e-20	1.90508089475109e-18
ENSG00000230439		NA		2.49033679556061	1.27597263100423e-20	2.39924462431981e-18
ENSG00000136688	IL36G	56300	interleukin 36, gamma [Source:HGNC Symbol;Acc:HGNC:15741]	4.80057792699611	2.43501875603105e-20	4.52939671619153e-18
ENSG00000198788	MUC2	NA	mucin 2, oligomeric mucus/gel-forming [Source:HGNC Symbol;Acc:HGNC:7512]	3.73040457912646	2.53971689557673e-20	4.67388963580658e-18
ENSG00000144821	MYH15	22989	myosin, heavy chain 15 [Source:HGNC Symbol;Acc:HGNC:31073]	3.04843856187008	2.62448546264544e-20	4.77904989666353e-18
ENSG00000278463	HIST1H2AB	8335	histone cluster 1, H2ab [Source:HGNC Symbol;Acc:HGNC:4734]	-2.16205329338184	3.40615737402069e-20	6.13782462637332e-18
ENSG00000275379	HIST1H3I	8354	histone cluster 1, H3i [Source:HGNC Symbol;Acc:HGNC:4771]	-2.22933336438458	4.09707515258455e-20	7.30673227469693e-18
ENSG00000198223	CSF2RA	1438	colony stimulating factor 2 receptor, alpha, low-affinity (granulocyte-macrophage) [Source:HGNC Symbol;Acc:HGNC:2435]	2.77976999381055	8.30562294503076e-20	1.46611195230701e-17
ENSG00000108342	CSF3	1440	colony stimulating factor 3 (granulocyte) [Source:HGNC Symbol;Acc:HGNC:2438]	5.26152639176961	8.57023508168253e-20	1.49086699056836e-17
ENSG00000138347	MYPN	84665	myopalladin [Source:HGNC Symbol;Acc:HGNC:23246]	2.33319011245371	8.61822643255889e-20	1.49086699056836e-17
ENSG00000131711	MAP1B	4131	microtubule-associated protein 1B [Source:HGNC Symbol;Acc:HGNC:6836]	2.69675052028947	1.11667912527364e-19	1.91261704832759e-17
ENSG00000169306	IL1RAPL1	11141	interleukin 1 receptor accessory protein-like 1 [Source:HGNC Symbol;Acc:HGNC:5996]	4.63474960537597	1.15968010385832e-19	1.96679471731815e-17
ENSG00000139318	DUSP6	1848	dual specificity phosphatase 6 [Source:HGNC Symbol;Acc:HGNC:3072]	1.75761623477656	1.17882369048522e-19	1.97985155550523e-17
ENSG00000265972	TXNIP	10628	thioredoxin interacting protein [Source:HGNC Symbol;Acc:HGNC:16952]	2.36415764447333	1.65535116682353e-19	2.75345383027695e-17
ENSG00000244405	ETV5	2119	ets variant 5 [Source:HGNC Symbol;Acc:HGNC:3494]	2.0636703184738	2.45141634065286e-19	4.03876678828132e-17
ENSG00000277075	HIST1H2AE	3012	histone cluster 1, H2ae [Source:HGNC Symbol;Acc:HGNC:4724]	-1.81139320367347	4.86669897974603e-19	7.94236091043647e-17
ENSG00000274997	HIST1H2AH	85235	histone cluster 1, H2ah [Source:HGNC Symbol;Acc:HGNC:13671]	-1.89571882605809	7.42172870023974e-19	1.18961923388551e-16
ENSG00000056558	TRAF1	7185	TNF receptor-associated factor 1 [Source:HGNC Symbol;Acc:HGNC:12031]	2.80911069138815	7.4269540007882e-19	1.18961923388551e-16
ENSG00000278637	HIST1H4A	8359	histone cluster 1, H4a [Source:HGNC Symbol;Acc:HGNC:4781]	-2.10568011087839	8.96438267767363e-19	1.42270510037685e-16
ENSG00000110031	LPXN	9404	leupaxin [Source:HGNC Symbol;Acc:HGNC:14061]	2.7447207787258	9.35853666979021e-19	1.47175750773364e-16
ENSG00000115414	FN1	2335	fibronectin 1 [Source:HGNC Symbol;Acc:HGNC:3778]	2.18441452265424	1.12516917906449e-18	1.75354068726456e-16
ENSG00000228742		NA		2.03482904042747	1.99965454834941e-18	3.08857357427646e-16
ENSG00000259828		NA		3.14987791010869	3.09919874429682e-18	4.74451673253015e-16
ENSG00000262406	MMP12	4321	matrix metallopeptidase 12 [Source:HGNC Symbol;Acc:HGNC:7158]	2.37615507548659	3.3779433757711e-18	5.12588091732143e-16
ENSG00000136404	TM6SF1	53346	transmembrane 6 superfamily member 1 [Source:HGNC Symbol;Acc:HGNC:11860]	4.25625879124703	4.43948844062687e-18	6.6781487421221e-16
ENSG00000185130	HIST1H2BL	8340	histone cluster 1, H2bl [Source:HGNC Symbol;Acc:HGNC:4748]	-1.82010143353681	6.17335268092775e-18	9.20627827822148e-16
ENSG00000005001	PRSS22	64063	protease, serine, 22 [Source:HGNC Symbol;Acc:HGNC:14368]	2.23200827585143	1.17269754082288e-17	1.73388844091411e-15
ENSG00000164283	ESM1	11082	endothelial cell-specific molecule 1 [Source:HGNC Symbol;Acc:HGNC:3466]	5.09154278498967	1.54310272555253e-17	2.26221474994349e-15
ENSG00000074416	MGLL	11343	monoglyceride lipase [Source:HGNC Symbol;Acc:HGNC:17038]	2.46943294765943	1.72036469262942e-17	2.48265338097584e-15
ENSG00000196747	HIST1H2AI	8329	histone cluster 1, H2ai [Source:HGNC Symbol;Acc:HGNC:4725]	-1.9831715231222	1.7221712568189e-17	2.48265338097584e-15
ENSG00000175315	CST6	1474	cystatin E/M [Source:HGNC Symbol;Acc:HGNC:2478]	2.38591807752552	1.99195568174545e-17	2.84783812714997e-15
ENSG00000197646	PDCD1LG2	80380	programmed cell death 1 ligand 2 [Source:HGNC Symbol;Acc:HGNC:18731]	2.4486075473481	2.45157248383964e-17	3.47620921294606e-15
ENSG00000159167	STC1	6781	stanniocalcin 1 [Source:HGNC Symbol;Acc:HGNC:11373]	3.71952566104917	3.58326749349389e-17	5.03958897316673e-15
ENSG00000197249	SERPINA1	5265	serpin peptidase inhibitor, clade A (alpha-1 antiproteinase, antitrypsin), member 1 [Source:HGNC Symbol;Acc:HGNC:8941]	2.77073856570901	3.8985913844211e-17	5.43884938379844e-15
ENSG00000109321	AREG	374	amphiregulin [Source:HGNC Symbol;Acc:HGNC:651]	1.72100228847464	4.36524781914897e-17	6.04115376187665e-15
ENSG00000234745	HLA-B	3106	major histocompatibility complex, class I, B [Source:HGNC Symbol;Acc:HGNC:4932]	1.93312132671075	5.96867680709769e-17	8.19461429253833e-15
ENSG00000197191	CYSRT1	375791	cysteine-rich tail protein 1 [Source:HGNC Symbol;Acc:HGNC:30529]	1.88382505631096	6.82212318411275e-17	9.29259125684776e-15
ENSG00000256268		NA		3.44053317238104	7.92818082099052e-17	1.07148125017434e-14
ENSG00000197632	SERPINB2	5055	serpin peptidase inhibitor, clade B (ovalbumin), member 2 [Source:HGNC Symbol;Acc:HGNC:8584]	4.39370736689991	8.37278621043291e-17	1.122797121351e-14
ENSG00000169247	SH3TC2	79628	SH3 domain and tetratricopeptide repeats 2 [Source:HGNC Symbol;Acc:HGNC:29427]	2.15522060861643	9.72805900121772e-17	1.29450532816973e-14
ENSG00000112096	SOD2	6648,100129518	superoxide dismutase 2, mitochondrial [Source:HGNC Symbol;Acc:HGNC:11180]	1.91256380164898	1.07051632533381e-16	1.41365358106485e-14
ENSG00000139289	PHLDA1	22822	pleckstrin homology-like domain, family A, member 1 [Source:HGNC Symbol;Acc:HGNC:8933]	1.92939781558513	1.13242658445129e-16	1.48407935488053e-14
ENSG00000144824	PHLDB2	90102	pleckstrin homology-like domain, family B, member 2 [Source:HGNC Symbol;Acc:HGNC:29573]	1.63364117740224	1.176986519944e-16	1.53087893297078e-14
ENSG00000115008	IL1A	3552	interleukin 1, alpha [Source:HGNC Symbol;Acc:HGNC:5991]	1.98413342139518	1.23810656304857e-16	1.59835861449084e-14
ENSG00000233822	HIST1H2BN	8341	histone cluster 1, H2bn [Source:HGNC Symbol;Acc:HGNC:4749]	-1.64859361523895	1.40398754953248e-16	1.79908004587869e-14
ENSG00000153294	ADGRF4	221393	adhesion G protein-coupled receptor F4 [Source:HGNC Symbol;Acc:HGNC:19011]	2.0292448670397	1.44258996779512e-16	1.83495322447704e-14
ENSG00000020577	SAMD4A	23034	sterile alpha motif domain containing 4A [Source:HGNC Symbol;Acc:HGNC:23023]	2.28002957905985	1.60408458479558e-16	2.02547877608604e-14
ENSG00000113758	DBN1	1627	drebrin 1 [Source:HGNC Symbol;Acc:HGNC:2695]	1.73927924022431	1.66527887432447e-16	2.08751153963326e-14
ENSG00000164867	NOS3	4846	nitric oxide synthase 3 (endothelial cell) [Source:HGNC Symbol;Acc:HGNC:7876]	3.56801290025668	1.92701642289264e-16	2.39818309456393e-14
ENSG00000110944	IL23A	51561	interleukin 23, alpha subunit p19 [Source:HGNC Symbol;Acc:HGNC:15488]	3.61123625400315	1.94083839088358e-16	2.39818309456393e-14
ENSG00000141682	PMAIP1	5366	phorbol-12-myristate-13-acetate-induced protein 1 [Source:HGNC Symbol;Acc:HGNC:9108]	1.66797146638395	2.17352165054134e-16	2.66664900941239e-14
ENSG00000100097	LGALS1	3956	lectin, galactoside-binding, soluble, 1 [Source:HGNC Symbol;Acc:HGNC:6561]	1.80880994833541	2.6933152317664e-16	3.2811028305864e-14
ENSG00000197641	SERPINB13	5275	serpin peptidase inhibitor, clade B (ovalbumin), member 13 [Source:HGNC Symbol;Acc:HGNC:8944]	-2.24989220352044	3.22826076482016e-16	3.90529251542824e-14
ENSG00000158406	HIST1H4H	8365	histone cluster 1, H4h [Source:HGNC Symbol;Acc:HGNC:4788]	-1.92340167148607	3.60434084941324e-16	4.32996474680554e-14
ENSG00000145107	TM4SF19	116211	transmembrane 4 L six family member 19 [Source:HGNC Symbol;Acc:HGNC:25167]	2.18682150220971	3.72518472580734e-16	4.44427383253387e-14
ENSG00000211782	TRAV8-1	NA	T cell receptor alpha variable 8-1 [Source:HGNC Symbol;Acc:HGNC:12146]	4.90778320165364	4.16235227505481e-16	4.93181726069679e-14
ENSG00000164949	GEM	2669	GTP binding protein overexpressed in skeletal muscle [Source:HGNC Symbol;Acc:HGNC:4234]	3.370593183625	5.6031861542215e-16	6.5938447130529e-14
ENSG00000031081	ARHGAP31	57514	Rho GTPase activating protein 31 [Source:HGNC Symbol;Acc:HGNC:29216]	2.04315939140231	6.57893896248412e-16	7.68980169675762e-14
ENSG00000213949	ITGA1	3672	integrin, alpha 1 [Source:HGNC Symbol;Acc:HGNC:6134]	2.48814761570346	6.67388586389013e-16	7.74842627915673e-14
ENSG00000133083	DCLK1	9201	doublecortin-like kinase 1 [Source:HGNC Symbol;Acc:HGNC:2700]	3.00657266814012	7.53094171590302e-16	8.68518404956042e-14
ENSG00000234155		101928820		3.88404224460696	7.79906488935153e-16	8.93483599476107e-14
ENSG00000182866	LCK	3932	LCK proto-oncogene, Src family tyrosine kinase [Source:HGNC Symbol;Acc:HGNC:6524]	3.23286735604192	8.44471431513406e-16	9.61086269325685e-14
ENSG00000257125	KRT127P	NA	keratin 127 pseudogene [Source:HGNC Symbol;Acc:HGNC:40019]	-2.80321254203259	9.9749011125062e-16	1.12781578003428e-13
ENSG00000241280		NA		4.68913727104712	1.03190307884283e-15	1.15914878966897e-13
ENSG00000278705	HIST1H4B	8366	histone cluster 1, H4b [Source:HGNC Symbol;Acc:HGNC:4789]	-2.10462669455954	1.18958805727539e-15	1.32765701953593e-13
ENSG00000214407		152225		4.51670528196923	1.4374036687521e-15	1.59395167088094e-13
ENSG00000073910	FRY	10129	furry homolog (Drosophila) [Source:HGNC Symbol;Acc:HGNC:20367]	2.43683056741263	2.19682380271932e-15	2.42056401039754e-13
ENSG00000214944	ARHGEF28	64283	Rho guanine nucleotide exchange factor (GEF) 28 [Source:HGNC Symbol;Acc:HGNC:30322]	1.75638121859415	2.36415815872828e-15	2.58845392328105e-13
ENSG00000278272	HIST1H3C	8352	histone cluster 1, H3c [Source:HGNC Symbol;Acc:HGNC:4768]	-1.84160523283891	2.38311499308668e-15	2.59279913618908e-13
ENSG00000103647	CORO2B	10391	coronin, actin binding protein, 2B [Source:HGNC Symbol;Acc:HGNC:2256]	2.97113942026829	2.85312181901578e-15	3.08475964669712e-13
ENSG00000277775	HIST1H3F	8968	histone cluster 1, H3f [Source:HGNC Symbol;Acc:HGNC:4773]	-1.56951383639151	3.13730816251922e-15	3.37094993188945e-13
ENSG00000197061	HIST1H4C	8364	histone cluster 1, H4c [Source:HGNC Symbol;Acc:HGNC:4787]	-1.55911291533414	3.7302212597125e-15	3.98327762788683e-13
ENSG00000123240	OPTN	10133	optineurin [Source:HGNC Symbol;Acc:HGNC:17142]	1.90118294897391	4.17429478729344e-15	4.43013040033063e-13
ENSG00000227467	LINC01537	101928555	long intergenic non-protein coding RNA 1537 [Source:HGNC Symbol;Acc:HGNC:51301]	2.84065399651097	4.38921320422218e-15	4.62981702559997e-13
ENSG00000198771	RCSD1	92241	RCSD domain containing 1 [Source:HGNC Symbol;Acc:HGNC:28310]	3.32786301652056	4.52631043771056e-15	4.74549359163364e-13
ENSG00000196998	WDR45	11152	WD repeat domain 45 [Source:HGNC Symbol;Acc:HGNC:28912]	1.73929654776238	4.59458327865293e-15	4.78805398418175e-13
ENSG00000166900	STX3	6809	syntaxin 3 [Source:HGNC Symbol;Acc:HGNC:11438]	1.64996089123355	4.72713175018793e-15	4.89668575727551e-13
ENSG00000149043	SYT8	90019	synaptotagmin VIII [Source:HGNC Symbol;Acc:HGNC:19264]	-1.80055931782223	5.08708366015578e-15	5.23818215696636e-13
ENSG00000006459	KDM7A	80853	lysine (K)-specific demethylase 7A [Source:HGNC Symbol;Acc:HGNC:22224]	1.87120073135099	5.52298045098205e-15	5.65337507819754e-13
ENSG00000070540	WIPI1	55062	WD repeat domain, phosphoinositide interacting 1 [Source:HGNC Symbol;Acc:HGNC:25471]	2.51342882367378	6.0413751167598e-15	6.1476322438134e-13
ENSG00000152784	PRDM8	56978	PR domain containing 8 [Source:HGNC Symbol;Acc:HGNC:13993]	3.21940336860438	7.79866119162399e-15	7.88941754116394e-13
ENSG00000114019	AMOTL2	51421	angiomotin like 2 [Source:HGNC Symbol;Acc:HGNC:17812]	1.73492282378992	9.18051136388985e-15	9.23335267929829e-13
ENSG00000103888	CEMIP	57214	cell migration inducing protein, hyaluronan binding [Source:HGNC Symbol;Acc:HGNC:29213]	2.18968232286047	9.77508788282526e-15	9.7745228488436e-13
ENSG00000134668	SPOCD1	90853	SPOC domain containing 1 [Source:HGNC Symbol;Acc:HGNC:26338]	2.17442907248183	1.03039410101729e-14	1.02441307778725e-12
ENSG00000161638	ITGA5	3678	integrin, alpha 5 (fibronectin receptor, alpha polypeptide) [Source:HGNC Symbol;Acc:HGNC:6141]	1.84317097279323	1.10177842625461e-14	1.08912371404449e-12
ENSG00000058085	LAMC2	3918	laminin, gamma 2 [Source:HGNC Symbol;Acc:HGNC:6493]	1.70734235851939	1.27437726290469e-14	1.25258251539706e-12
ENSG00000272398	CD24	100133941	CD24 molecule [Source:HGNC Symbol;Acc:HGNC:1645]	2.95578759723235	1.3532176596679e-14	1.31939780285331e-12
ENSG00000196639	HRH1	3269	histamine receptor H1 [Source:HGNC Symbol;Acc:HGNC:5182]	1.69888917333053	1.35760916184686e-14	1.31939780285331e-12
ENSG00000275126	HIST1H4L	8368	histone cluster 1, H4l [Source:HGNC Symbol;Acc:HGNC:4791]	-1.59713595206679	1.44063638122008e-14	1.39226641110202e-12
ENSG00000148180	GSN	2934	gelsolin [Source:HGNC Symbol;Acc:HGNC:4620]	2.13864885861006	1.59967576557745e-14	1.53737728159579e-12
ENSG00000105974	CAV1	857	caveolin 1, caveolae protein, 22kDa [Source:HGNC Symbol;Acc:HGNC:1527]	-1.73779107957195	1.8014998347392e-14	1.72177600227367e-12
ENSG00000187678	SPRY4	81848	sprouty homolog 4 (Drosophila) [Source:HGNC Symbol;Acc:HGNC:15533]	2.94515170008822	1.96128112789504e-14	1.8641869357943e-12
ENSG00000035862	TIMP2	7077	TIMP metallopeptidase inhibitor 2 [Source:HGNC Symbol;Acc:HGNC:11821]	2.38785470733534	2.52924337896591e-14	2.39089514823668e-12
ENSG00000112149	CD83	9308	CD83 molecule [Source:HGNC Symbol;Acc:HGNC:1703]	1.8673428193076	2.89822011956892e-14	2.71491269371212e-12
ENSG00000206538	VGLL3	389136	vestigial-like family member 3 [Source:HGNC Symbol;Acc:HGNC:24327]	2.87708932167226	2.90339816369005e-14	2.71491269371212e-12
ENSG00000023171	GRAMD1B	57476	GRAM domain containing 1B [Source:HGNC Symbol;Acc:HGNC:29214]	2.26693207610627	2.94774783342338e-14	2.74156396615006e-12
ENSG00000140937	CDH11	1009	cadherin 11, type 2, OB-cadherin (osteoblast) [Source:HGNC Symbol;Acc:HGNC:1750]	2.10853078172825	3.04018239439992e-14	2.81241257971788e-12
ENSG00000274641	HIST1H2BO	8348	histone cluster 1, H2bo [Source:HGNC Symbol;Acc:HGNC:4758]	-1.54647184187912	3.55465069094633e-14	3.27084586716386e-12
ENSG00000089723	OTUB2	78990	OTU deubiquitinase, ubiquitin aldehyde binding 2 [Source:HGNC Symbol;Acc:HGNC:20351]	2.08523803017658	3.69907908796788e-14	3.38573381707705e-12
ENSG00000205420	KRT6A	3853	keratin 6A, type II [Source:HGNC Symbol;Acc:HGNC:6443]	-1.77529144786814	4.20815205616896e-14	3.83141170629825e-12
ENSG00000196866	HIST1H2AD	3013	histone cluster 1, H2ad [Source:HGNC Symbol;Acc:HGNC:4729]	-1.57108389429263	4.87587558506609e-14	4.41611370398211e-12
ENSG00000125968	ID1	3397	inhibitor of DNA binding 1, dominant negative helix-loop-helix protein [Source:HGNC Symbol;Acc:HGNC:5360]	-2.10722310071755	5.14127683910467e-14	4.63223687706623e-12
ENSG00000206337	HCP5	10866	HLA complex P5 (non-protein coding) [Source:HGNC Symbol;Acc:HGNC:21659]	1.73066941025323	5.6607672991521e-14	5.06569728948518e-12
ENSG00000179674	ARL14	80117	ADP-ribosylation factor-like 14 [Source:HGNC Symbol;Acc:HGNC:22974]	2.00333523462348	5.68093689901222e-14	5.06569728948518e-12
ENSG00000128342	LIF	3976	leukemia inhibitory factor [Source:HGNC Symbol;Acc:HGNC:6596]	2.68822618924825	6.03087004009904e-14	5.35015491403453e-12
ENSG00000145911	N4BP3	23138	NEDD4 binding protein 3 [Source:HGNC Symbol;Acc:HGNC:29852]	2.05177451753094	6.43640856836151e-14	5.68078733796356e-12
ENSG00000082074	FYB	2533	FYN binding protein [Source:HGNC Symbol;Acc:HGNC:4036]	2.14059406484808	6.56349435065026e-14	5.76354765339588e-12
ENSG00000175841	FAM172BP	NA	family with sequence similarity 172, member B, pseudogene [Source:HGNC Symbol;Acc:HGNC:34336]	4.37336248006028	7.49476897134483e-14	6.54808123410577e-12
ENSG00000250232		NA	Uncharacterized protein [Source:UniProtKB/TrEMBL;Acc:A6NM71]	1.74825130164796	7.83762753051817e-14	6.81322204273537e-12
ENSG00000067798	NAV3	89795	neuron navigator 3 [Source:HGNC Symbol;Acc:HGNC:15998]	1.67025341044062	9.23658932830463e-14	7.98918793951709e-12
ENSG00000136244	IL6	3569	interleukin 6 [Source:HGNC Symbol;Acc:HGNC:6018]	2.45928724719958	9.51502841215982e-14	8.18907843293297e-12
ENSG00000102755	FLT1	2321	fms-related tyrosine kinase 1 [Source:HGNC Symbol;Acc:HGNC:3763]	2.60805624682594	1.33164984030097e-13	1.14040646472111e-11
ENSG00000179178	TMEM125	128218	transmembrane protein 125 [Source:HGNC Symbol;Acc:HGNC:28275]	1.87726709103751	1.34970529315292e-13	1.1501749687809e-11
ENSG00000081181	ARG2	384	arginase 2 [Source:HGNC Symbol;Acc:HGNC:664]	2.01085648204774	1.36357780072275e-13	1.15630060660308e-11
ENSG00000170786	SDR16C5	195814	short chain dehydrogenase/reductase family 16C, member 5 [Source:HGNC Symbol;Acc:HGNC:30311]	2.7123139563193	1.43206489014724e-13	1.20845319681254e-11
ENSG00000179913	B3GNT3	10331	UDP-GlcNAc:betaGal beta-1,3-N-acetylglucosaminyltransferase 3 [Source:HGNC Symbol;Acc:HGNC:13528]	1.9870207821583	1.50472019135238e-13	1.26359973738858e-11
ENSG00000163283	ALPP	250	alkaline phosphatase, placental [Source:HGNC Symbol;Acc:HGNC:439]	-1.97808338211599	1.58184858406276e-13	1.32195162587931e-11
ENSG00000198682	PAPSS2	9060	3'-phosphoadenosine 5'-phosphosulfate synthase 2 [Source:HGNC Symbol;Acc:HGNC:8604]	1.96371209552415	1.8667946297347e-13	1.5525807836433e-11
ENSG00000160179	ABCG1	9619	ATP-binding cassette, sub-family G (WHITE), member 1 [Source:HGNC Symbol;Acc:HGNC:73]	2.56944507059313	1.88034686327877e-13	1.5563693965483e-11
ENSG00000124635	HIST1H2BJ	8970	histone cluster 1, H2bj [Source:HGNC Symbol;Acc:HGNC:4761]	-1.48277605563905	1.96565344432425e-13	1.61923042539834e-11
ENSG00000006118	TMEM132A	54972	transmembrane protein 132A [Source:HGNC Symbol;Acc:HGNC:31092]	1.6967044792178	2.10366244195598e-13	1.7247041034785e-11
ENSG00000197837	HIST4H4	121504	histone cluster 4, H4 [Source:HGNC Symbol;Acc:HGNC:20510]	-1.61629895504851	2.2870206691662e-13	1.86618729037293e-11
ENSG00000139278	GLIPR1	11010	GLI pathogenesis-related 1 [Source:HGNC Symbol;Acc:HGNC:17001]	2.02299318016995	2.88413984566875e-13	2.34238193381332e-11
ENSG00000204386	NEU1	4758	sialidase 1 (lysosomal sialidase) [Source:HGNC Symbol;Acc:HGNC:7758]	1.47029654492773	3.07405747477032e-13	2.48495889046971e-11
ENSG00000183742	MACC1	346389	metastasis associated in colon cancer 1 [Source:HGNC Symbol;Acc:HGNC:30215]	1.77577958680875	3.13722150976304e-13	2.5242230184833e-11
ENSG00000107201	DDX58	23586	DEAD (Asp-Glu-Ala-Asp) box polypeptide 58 [Source:HGNC Symbol;Acc:HGNC:19102]	1.73438614268351	3.44702001561665e-13	2.76064811343299e-11
ENSG00000140931	CMTM3	123920	CKLF-like MARVEL transmembrane domain containing 3 [Source:HGNC Symbol;Acc:HGNC:19174]	2.10679880664943	3.56628504258751e-13	2.84300299316688e-11
ENSG00000086570	FAT2	2196	FAT atypical cadherin 2 [Source:HGNC Symbol;Acc:HGNC:3596]	-1.53916879175565	3.90739043371809e-13	3.10063977582061e-11
ENSG00000273802	HIST1H2BG	8339	histone cluster 1, H2bg [Source:HGNC Symbol;Acc:HGNC:4746]	-1.49104167212492	4.40779621716813e-13	3.4817564730955e-11
ENSG00000012822	CALCOCO1	57658	calcium binding and coiled-coil domain 1 [Source:HGNC Symbol;Acc:HGNC:29306]	2.01335106105586	4.91635591507516e-13	3.86582004431297e-11
ENSG00000137331	IER3	8870	immediate early response 3 [Source:HGNC Symbol;Acc:HGNC:5392]	1.44700604615239	5.44307128305455e-13	4.26061946269505e-11
ENSG00000101986	ABCD1	215	ATP-binding cassette, sub-family D (ALD), member 1 [Source:HGNC Symbol;Acc:HGNC:61]	2.00050365459361	5.57951436354807e-13	4.34774860247829e-11
ENSG00000108984	MAP2K6	5608	mitogen-activated protein kinase kinase 6 [Source:HGNC Symbol;Acc:HGNC:6846]	-3.08741877856475	5.80455533035234e-13	4.5028252313796e-11
ENSG00000124143	ARHGAP40	343578	Rho GTPase activating protein 40 [Source:HGNC Symbol;Acc:HGNC:16226]	2.5395686882354	5.9459630647303e-13	4.59192924360578e-11
ENSG00000113742	CPEB4	80315	cytoplasmic polyadenylation element binding protein 4 [Source:HGNC Symbol;Acc:HGNC:21747]	1.56720661412687	6.46996540873004e-13	4.97439696024982e-11
ENSG00000108309	RUNDC3A	10900	RUN domain containing 3A [Source:HGNC Symbol;Acc:HGNC:16984]	2.58291710104177	7.07560836785924e-13	5.41597120157509e-11
ENSG00000260953		NA		3.76485159326101	7.19495169103887e-13	5.48306032173046e-11
ENSG00000143507	DUSP10	11221	dual specificity phosphatase 10 [Source:HGNC Symbol;Acc:HGNC:3065]	1.76605972693026	7.75764548493617e-13	5.8606238790771e-11
ENSG00000196787	HIST1H2AG	8969	histone cluster 1, H2ag [Source:HGNC Symbol;Acc:HGNC:4737]	-1.60417189584901	7.75815288923438e-13	5.8606238790771e-11
ENSG00000175197	DDIT3	1649	DNA-damage-inducible transcript 3 [Source:HGNC Symbol;Acc:HGNC:2726]	1.76622495641237	7.90240137935083e-13	5.94363658527783e-11
ENSG00000130513	GDF15	9518	growth differentiation factor 15 [Source:HGNC Symbol;Acc:HGNC:30142]	1.5664622885864	9.46127669631432e-13	7.08530846621391e-11
ENSG00000227300	KRT16P2	NA	keratin 16 pseudogene 2 [Source:HGNC Symbol;Acc:HGNC:37807]	2.72970967673504	9.67445914819197e-13	7.21372710364538e-11
ENSG00000170396	ZNF804A	91752	zinc finger protein 804A [Source:HGNC Symbol;Acc:HGNC:21711]	2.83112259210853	1.16029857227497e-12	8.61459442136681e-11
ENSG00000168298	HIST1H1E	3008	histone cluster 1, H1e [Source:HGNC Symbol;Acc:HGNC:4718]	-1.86561188729679	1.22914304464013e-12	9.08672885864513e-11
ENSG00000275221	HIST1H2AK	8330	histone cluster 1, H2ak [Source:HGNC Symbol;Acc:HGNC:4726]	-1.61830014919483	1.25828225365856e-12	9.26256370469761e-11
ENSG00000125571	IL37	27178	interleukin 37 [Source:HGNC Symbol;Acc:HGNC:15563]	3.55207239806174	1.2703696429527e-12	9.31191714128763e-11
ENSG00000119698	PPP4R4	57718	protein phosphatase 4, regulatory subunit 4 [Source:HGNC Symbol;Acc:HGNC:23788]	2.00412868907345	1.4142325446589e-12	1.03227041308246e-10
ENSG00000163536	SERPINI1	5274	serpin peptidase inhibitor, clade I (neuroserpin), member 1 [Source:HGNC Symbol;Acc:HGNC:8943]	1.90918265473936	1.43158334095092e-12	1.0396860804595e-10
ENSG00000111863	ADTRP	84830	androgen-dependent TFPI-regulating protein [Source:HGNC Symbol;Acc:HGNC:21214]	1.95887344574137	1.43641235464374e-12	1.0396860804595e-10
ENSG00000101096	NFATC2	4773	nuclear factor of activated T-cells, cytoplasmic, calcineurin-dependent 2 [Source:HGNC Symbol;Acc:HGNC:7776]	2.39596764361354	1.46396902602545e-12	1.05521667421726e-10
ENSG00000010818	HIVEP2	3097	human immunodeficiency virus type I enhancer binding protein 2 [Source:HGNC Symbol;Acc:HGNC:4921]	1.42237259603017	1.54698746845602e-12	1.11042888866476e-10
ENSG00000121895	TMEM156	80008	transmembrane protein 156 [Source:HGNC Symbol;Acc:HGNC:26260]	1.93211806425428	1.77069664754469e-12	1.26575542586262e-10
ENSG00000128512	DOCK4	9732	dedicator of cytokinesis 4 [Source:HGNC Symbol;Acc:HGNC:19192]	1.93556779032582	1.77917939873307e-12	1.266585367024e-10
ENSG00000198626	RYR2	6262	ryanodine receptor 2 (cardiac) [Source:HGNC Symbol;Acc:HGNC:10484]	1.98896506663378	1.88465268577741e-12	1.33617241029768e-10
ENSG00000132932	ATP8A2	51761	ATPase, aminophospholipid transporter, class I, type 8A, member 2 [Source:HGNC Symbol;Acc:HGNC:13533]	2.88996951636713	1.9074893115353e-12	1.3468431673571e-10
ENSG00000231106	LINC01436	NA	long intergenic non-protein coding RNA 1436 [Source:HGNC Symbol;Acc:HGNC:50754]	4.07127414018276	1.93991896653266e-12	1.36417309764425e-10
ENSG00000005238	FAM214B	80256	family with sequence similarity 214, member B [Source:HGNC Symbol;Acc:HGNC:25666]	2.12687007531878	2.24410549518202e-12	1.57169153688881e-10
ENSG00000205755	CRLF2	64109	cytokine receptor-like factor 2 [Source:HGNC Symbol;Acc:HGNC:14281]	4.27449804598993	2.30614695434785e-12	1.60863049045417e-10
ENSG00000173482	PTPRM	5797	protein tyrosine phosphatase, receptor type, M [Source:HGNC Symbol;Acc:HGNC:9675]	2.32078245288465	2.42460135142467e-12	1.68214732459941e-10
ENSG00000275713	HIST1H2BH	8345	histone cluster 1, H2bh [Source:HGNC Symbol;Acc:HGNC:4755]	-1.44125191731745	2.43098925458033e-12	1.68214732459941e-10
ENSG00000165474	GJB2	2706	gap junction protein, beta 2, 26kDa [Source:HGNC Symbol;Acc:HGNC:4284]	1.87084868026228	2.47507765309865e-12	1.7058314072093e-10
ENSG00000140678	ITGAX	3687	integrin, alpha X (complement component 3 receptor 4 subunit) [Source:HGNC Symbol;Acc:HGNC:6152]	2.04081339592715	2.64671620076899e-12	1.81688664909138e-10
ENSG00000149260	CAPN5	726	calpain 5 [Source:HGNC Symbol;Acc:HGNC:1482]	2.6823662100265	2.67506526167513e-12	1.82908908939597e-10
ENSG00000196890	HIST3H2BB	128312	histone cluster 3, H2bb [Source:HGNC Symbol;Acc:HGNC:20514]	-1.51218790346867	2.70226117933239e-12	1.84041008430201e-10
ENSG00000213654	GPSM3	63940	G-protein signaling modulator 3 [Source:HGNC Symbol;Acc:HGNC:13945]	2.53254836975185	2.9508929687898e-12	2.00186264576842e-10
ENSG00000100558	PLEK2	26499	pleckstrin 2 [Source:HGNC Symbol;Acc:HGNC:19238]	1.52241520669801	3.05627482761811e-12	2.06525383761585e-10
ENSG00000172548	NIPAL4	348938	NIPA-like domain containing 4 [Source:HGNC Symbol;Acc:HGNC:28018]	1.85511725556031	3.37222688742017e-12	2.26988921889033e-10
ENSG00000198873	GRK5	2869	G protein-coupled receptor kinase 5 [Source:HGNC Symbol;Acc:HGNC:4544]	1.96195204438186	3.43120326290345e-12	2.30063508701422e-10
ENSG00000125538	IL1B	3553	interleukin 1, beta [Source:HGNC Symbol;Acc:HGNC:5992]	1.33736724437433	3.54147509358479e-12	2.36540454223642e-10
ENSG00000183598	HIST2H3D	653604	histone cluster 2, H3d [Source:HGNC Symbol;Acc:HGNC:25311]	-1.85606272177813	3.90877900007199e-12	2.60069107393252e-10
ENSG00000174640	SLCO2A1	6578	solute carrier organic anion transporter family, member 2A1 [Source:HGNC Symbol;Acc:HGNC:10955]	3.67462087042659	3.95773915043838e-12	2.62317737790933e-10
ENSG00000154589	LY96	23643	lymphocyte antigen 96 [Source:HGNC Symbol;Acc:HGNC:17156]	3.73724200840511	4.06414673011382e-12	2.68342268260454e-10
ENSG00000139266	MARCH9	92979	membrane-associated ring finger (C3HC4) 9 [Source:HGNC Symbol;Acc:HGNC:25139]	2.35092374616782	4.1262303227978e-12	2.71405545072544e-10
ENSG00000160469	BRSK1	84446	BR serine/threonine kinase 1 [Source:HGNC Symbol;Acc:HGNC:18994]	3.32045884555174	4.41234389228059e-12	2.89125518911219e-10
ENSG00000119801	YPEL5	51646	yippee-like 5 (Drosophila) [Source:HGNC Symbol;Acc:HGNC:18329]	1.8695216992262	4.69261396549033e-12	3.06330298071763e-10
ENSG00000273983	HIST1H3G	8355	histone cluster 1, H3g [Source:HGNC Symbol;Acc:HGNC:4772]	-1.34553009439855	4.86768321578610e-12	3.16564105074751e-10
ENSG00000243742	RPLP0P2	113157	ribosomal protein, large, P0 pseudogene 2 [Source:HGNC Symbol;Acc:HGNC:17960]	2.57572372925597	5.37455108040533e-12	3.48218573557797e-10
ENSG00000080031	PTPRH	5794	protein tyrosine phosphatase, receptor type, H [Source:HGNC Symbol;Acc:HGNC:9672]	1.80763224314128	5.79559059593923e-12	3.74096722832659e-10
ENSG00000167914	GSDMA	284110	gasdermin A [Source:HGNC Symbol;Acc:HGNC:13311]	4.7068877917423	7.04775871459621e-12	4.53231144995538e-10
ENSG00000144452	ABCA12	26154	ATP-binding cassette, sub-family A (ABC1), member 12 [Source:HGNC Symbol;Acc:HGNC:14637]	1.70790807479441	7.59046659515581e-12	4.84562961825683e-10
ENSG00000006468	ETV1	2115	ets variant 1 [Source:HGNC Symbol;Acc:HGNC:3490]	2.14269440362664	7.59099154024857e-12	4.84562961825683e-10
ENSG00000187498	COL4A1	1282	collagen, type IV, alpha 1 [Source:HGNC Symbol;Acc:HGNC:2202]	1.43836306221684	7.78988343924275e-12	4.95430858880369e-10
ENSG00000108602	ALDH3A1	218	aldehyde dehydrogenase 3 family, member A1 [Source:HGNC Symbol;Acc:HGNC:405]	-1.53022762892325	8.56736844374078e-12	5.42882442154841e-10
ENSG00000187837	HIST1H1C	3006	histone cluster 1, H1c [Source:HGNC Symbol;Acc:HGNC:4716]	-1.72542115355929	9.3051138368936e-12	5.87478701694972e-10
ENSG00000262001	DLGAP1-AS2	NA	DLGAP1 antisense RNA 2 [Source:HGNC Symbol;Acc:HGNC:28146]	1.77102403921251	9.46804205079748e-12	5.95591488860893e-10
ENSG00000221926	TRIM16	10626,147166	tripartite motif containing 16 [Source:HGNC Symbol;Acc:HGNC:17241]	-1.37764485885297	1.02858529821885e-11	6.44691922966951e-10
ENSG00000251537		NA	Uncharacterized protein [Source:UniProtKB/TrEMBL;Acc:H0Y626]	-1.41301402754268	1.07920666744475e-11	6.73978200004577e-10
ENSG00000119681	LTBP2	4053	latent transforming growth factor beta binding protein 2 [Source:HGNC Symbol;Acc:HGNC:6715]	1.67712756357977	1.10908383449394e-11	6.90145368809738e-10
ENSG00000072210	ALDH3A2	224	aldehyde dehydrogenase 3 family, member A2 [Source:HGNC Symbol;Acc:HGNC:403]	-1.32268455226726	1.14418041055157e-11	7.09432864592529e-10
ENSG00000087128	TMPRSS11E	28983	transmembrane protease, serine 11E [Source:HGNC Symbol;Acc:HGNC:24465]	2.64550684935517	1.17632246109362e-11	7.26757223373516e-10
ENSG00000132535	DLG4	1742	discs, large homolog 4 (Drosophila) [Source:HGNC Symbol;Acc:HGNC:2903]	2.13248154108155	1.1951962567998e-11	7.35790037237712e-10
ENSG00000248508	SRP14-AS1	100131089	SRP14 antisense RNA1 (head to head) [Source:HGNC Symbol;Acc:HGNC:48619]	2.51985835754134	1.24155748073801e-11	7.61620668769039e-10
ENSG00000185022	MAFF	23764	v-maf avian musculoaponeurotic fibrosarcoma oncogene homolog F [Source:HGNC Symbol;Acc:HGNC:6780]	1.54209390308275	1.25520392764692e-11	7.67271121708975e-10
ENSG00000072954	TMEM38A	79041	transmembrane protein 38A [Source:HGNC Symbol;Acc:HGNC:28462]	2.00095335972541	1.28243286870452e-11	7.81155147736605e-10
ENSG00000141505	ASGR1	432	asialoglycoprotein receptor 1 [Source:HGNC Symbol;Acc:HGNC:742]	2.78031454017672	1.29205443544263e-11	7.84254374691999e-10
ENSG00000197153	HIST1H3J	8356	histone cluster 1, H3j [Source:HGNC Symbol;Acc:HGNC:4774]	-1.4793181208977	1.32629333018548e-11	8.02221969191558e-10
ENSG00000198807	PAX9	5083	paired box 9 [Source:HGNC Symbol;Acc:HGNC:8623]	-1.39509302688968	1.47763481060829e-11	8.90317236654225e-10
ENSG00000102879	CORO1A	11151	coronin, actin binding protein, 1A [Source:HGNC Symbol;Acc:HGNC:2252]	1.9479202481115	1.48223229178806e-11	8.90317236654225e-10
ENSG00000142173	COL6A2	1292	collagen, type VI, alpha 2 [Source:HGNC Symbol;Acc:HGNC:2212]	1.90422470951023	1.53696406978508e-11	9.19997973813569e-10
ENSG00000225339		NA		2.19651666205981	1.67775311145522e-11	1.00080865776082e-09
ENSG00000131015	ULBP2	80328	UL16 binding protein 2 [Source:HGNC Symbol;Acc:HGNC:14894]	1.38604913735153	1.8166347334259e-11	1.07993004307679e-09
ENSG00000185862	EVI2B	2124	ecotropic viral integration site 2B [Source:HGNC Symbol;Acc:HGNC:3500]	2.77274760327544	1.86754969598792e-11	1.10453669193699e-09
ENSG00000177675	CD163L1	283316	CD163 molecule-like 1 [Source:HGNC Symbol;Acc:HGNC:30375]	2.25815387981472	1.87079744920248e-11	1.10453669193699e-09
ENSG00000246228	CASC8	727677	cancer susceptibility candidate 8 (non-protein coding) [Source:HGNC Symbol;Acc:HGNC:45129]	1.93320290295124	1.90888480055752e-11	1.12319041377022e-09
ENSG00000280587	LINC01348	NA	long intergenic non-protein coding RNA 1348 [Source:HGNC Symbol;Acc:HGNC:50567]	2.24518721141792	2.07519954985212e-11	1.21691108518277e-09
ENSG00000241978	AKAP2	11217	A kinase (PRKA) anchor protein 2 [Source:HGNC Symbol;Acc:HGNC:372]	1.42694617546717	2.096615211593e-11	1.22531576166714e-09
ENSG00000128917	DLL4	54567	delta-like 4 (Drosophila) [Source:HGNC Symbol;Acc:HGNC:2910]	2.90801842002802	2.20608269375433e-11	1.28495032051368e-09
ENSG00000230533		NA		2.87182550775979	2.266028793643e-11	1.31543731883323e-09
ENSG00000276966	HIST1H4E	8367	histone cluster 1, H4e [Source:HGNC Symbol;Acc:HGNC:4790]	-1.37854459997326	2.37861821293785e-11	1.37617780821444e-09
ENSG00000130598	TNNI2	7136	troponin I type 2 (skeletal, fast) [Source:HGNC Symbol;Acc:HGNC:11946]	-1.87238633371136	2.56334158090193e-11	1.47810820026742e-09
ENSG00000119922	IFIT2	3433	interferon-induced protein with tetratricopeptide repeats 2 [Source:HGNC Symbol;Acc:HGNC:5409]	1.43094645802593	2.58855859368092e-11	1.48769020305934e-09
ENSG00000115009	CCL20	6364	chemokine (C-C motif) ligand 20 [Source:HGNC Symbol;Acc:HGNC:10619]	3.63136970316849	2.69319173635683e-11	1.54269946514029e-09
ENSG00000109458	GAB1	2549	GRB2-associated binding protein 1 [Source:HGNC Symbol;Acc:HGNC:4066]	1.44261595780446	2.70433961818473e-11	1.54397264207847e-09
ENSG00000026036	RTEL1-TNFRSF6B	NA	RTEL1-TNFRSF6B readthrough (NMD candidate) [Source:HGNC Symbol;Acc:HGNC:44095]	-1.81269096696229	2.96015470164432e-11	1.68446434814951e-09
ENSG00000233452	STXBP5-AS1	NA	STXBP5 antisense RNA 1 [Source:HGNC Symbol;Acc:HGNC:44183]	2.59798642760143	2.98758150577016e-11	1.69449745797764e-09
ENSG00000157654	PALM2-AKAP2	445815	PALM2-AKAP2 readthrough [Source:HGNC Symbol;Acc:HGNC:33529]	1.40386609748716	3.0650911280387e-11	1.7327781511092e-09
ENSG00000171388	APLN	8862	apelin [Source:HGNC Symbol;Acc:HGNC:16665]	2.3144414021061	3.12879037490125e-11	1.76198892891317e-09
ENSG00000258366	RTEL1	51750	regulator of telomere elongation helicase 1 [Source:HGNC Symbol;Acc:HGNC:15888]	-1.68520585693991	3.1371327250434e-11	1.76198892891317e-09
ENSG00000101577	LPIN2	9663	lipin 2 [Source:HGNC Symbol;Acc:HGNC:14450]	1.83453398781239	3.16807860012103e-11	1.77361138199009e-09
ENSG00000002726	AOC1	26	amine oxidase, copper containing 1 [Source:HGNC Symbol;Acc:HGNC:80]	4.05509718022666	3.21422069582818e-11	1.7936388328107e-09
ENSG00000198933	TBKBP1	9755	TBK1 binding protein 1 [Source:HGNC Symbol;Acc:HGNC:30140]	2.47367756352448	3.53530405065882e-11	1.96647024991469e-09
ENSG00000204642	HLA-F	3134	major histocompatibility complex, class I, F [Source:HGNC Symbol;Acc:HGNC:4963]	1.68056656979337	4.06783807563734e-11	2.2554336817452e-09
ENSG00000139714	MORN3	283385	MORN repeat containing 3 [Source:HGNC Symbol;Acc:HGNC:29807]	3.16746260678488	4.74747649128468e-11	2.62215709405683e-09
ENSG00000135048	TMEM2	23670	transmembrane protein 2 [Source:HGNC Symbol;Acc:HGNC:11869]	2.00427653800703	4.75956603002396e-11	2.62215709405683e-09
ENSG00000222009	BTBD19	149478	BTB (POZ) domain containing 19 [Source:HGNC Symbol;Acc:HGNC:27145]	1.86767837094506	5.3067312530013e-11	2.91432203002125e-09
ENSG00000259153		NA		1.78429580993305	5.45181113680005e-11	2.98452154606026e-09
ENSG00000117407	ARTN	9048	artemin [Source:HGNC Symbol;Acc:HGNC:727]	-1.54039875177677	5.5954276416388e-11	3.05347958273532e-09
ENSG00000235884	LINC00941	NA	long intergenic non-protein coding RNA 941 [Source:HGNC Symbol;Acc:HGNC:48635]	1.70535744879295	5.74227628731261e-11	3.12376218535286e-09
ENSG00000136205	TNS3	64759	tensin 3 [Source:HGNC Symbol;Acc:HGNC:21616]	-1.43600443634298	5.96017600761952e-11	3.23213431836395e-09
ENSG00000185069	KRT76	51350	keratin 76, type II [Source:HGNC Symbol;Acc:HGNC:24430]	-2.34563204946782	6.0651290495923e-11	3.27877085715304e-09
ENSG00000119632	IFI27L2	83982	interferon, alpha-inducible protein 27-like 2 [Source:HGNC Symbol;Acc:HGNC:19753]	1.4859314187647	6.46106417950725e-11	3.48192988290642e-09
ENSG00000108448	TRIM16L	147166	tripartite motif containing 16-like [Source:HGNC Symbol;Acc:HGNC:32670]	-1.38320692477445	6.55388183934441e-11	3.52098142667139e-09
ENSG00000266401		NA		2.16893833356676	6.71107028269353e-11	3.59426640310574e-09
ENSG00000273331	TM4SF19-TCTEX1D2	NA	TM4SF19-TCTEX1D2 readthrough (NMD candidate) [Source:HGNC Symbol;Acc:HGNC:49190]	1.76870118550734	6.75409744572367e-11	3.6061460405424e-09
ENSG00000187720	THSD4	79875	thrombospondin, type I, domain containing 4 [Source:HGNC Symbol;Acc:HGNC:25835]	1.6669593513383	7.54735166462742e-11	4.01728112142738e-09
ENSG00000272405		NA		2.82108488587525	7.85462511628913e-11	4.16801103946889e-09
ENSG00000255857	PXN-AS1	NA	PXN antisense RNA 1 [Source:HGNC Symbol;Acc:HGNC:44123]	-1.89192634980356	8.40204239933223e-11	4.4448602894816e-09
ENSG00000253276	CCDC71L	168455	coiled-coil domain containing 71-like [Source:HGNC Symbol;Acc:HGNC:26685]	1.43588141842669	8.59110705312797e-11	4.53102319853844e-09
ENSG00000184489	PTP4A3	11156	protein tyrosine phosphatase type IVA, member 3 [Source:HGNC Symbol;Acc:HGNC:9636]	2.46543518580661	8.69519819885617e-11	4.57198278547152e-09
ENSG00000151014	CCRN4L	25819	CCR4 carbon catabolite repression 4-like (S. cerevisiae) [Source:HGNC Symbol;Acc:HGNC:14254]	1.42304149585838	8.93566145659116e-11	4.68418204659304e-09
ENSG00000078081	LAMP3	27074	lysosomal-associated membrane protein 3 [Source:HGNC Symbol;Acc:HGNC:14582]	1.88093529673578	9.14502452320412e-11	4.77140344127782e-09
ENSG00000271270	TMCC1-AS1	100507032	TMCC1 antisense RNA 1 (head to head) [Source:HGNC Symbol;Acc:HGNC:49060]	2.49484401605986	9.1572110671382e-11	4.77140344127782e-09
ENSG00000164741	DLC1	10395	DLC1 Rho GTPase activating protein [Source:HGNC Symbol;Acc:HGNC:2897]	1.73001573491747	1.00142083806486e-10	5.20227599930452e-09
ENSG00000233077	LINC01271	101927586	long intergenic non-protein coding RNA 1271 [Source:HGNC Symbol;Acc:HGNC:50327]	3.78385498929211	1.04456509653545e-10	5.41015916316371e-09
ENSG00000134871	COL4A2	1284	collagen, type IV, alpha 2 [Source:HGNC Symbol;Acc:HGNC:2203]	1.277360327819	1.09247692264678e-10	5.64142038354228e-09
ENSG00000180263	FGD6	55785	FYVE, RhoGEF and PH domain containing 6 [Source:HGNC Symbol;Acc:HGNC:21740]	1.27145061199344	1.11643347134558e-10	5.74797101809738e-09
ENSG00000108176	DNAJC12	56521	DnaJ (Hsp40) homolog, subfamily C, member 12 [Source:HGNC Symbol;Acc:HGNC:28908]	2.72558947335135	1.12236491384927e-10	5.7613622091034e-09
ENSG00000143515	ATP8B2	57198	ATPase, aminophospholipid transporter, class I, type 8B, member 2 [Source:HGNC Symbol;Acc:HGNC:13534]	1.64205467944457	1.15452684477597e-10	5.90892304372172e-09
ENSG00000021355	SERPINB1	1992	serpin peptidase inhibitor, clade B (ovalbumin), member 1 [Source:HGNC Symbol;Acc:HGNC:3311]	1.29810636200525	1.24306318530636e-10	6.34328909811644e-09
ENSG00000126709	IFI6	2537	interferon, alpha-inducible protein 6 [Source:HGNC Symbol;Acc:HGNC:4054]	1.62190277331814	1.30710920514217e-10	6.65049474698659e-09
ENSG00000179776	CDH5	1003	cadherin 5, type 2 (vascular endothelium) [Source:HGNC Symbol;Acc:HGNC:1764]	1.55469729103431	1.31286212532746e-10	6.6561411722139e-09
ENSG00000169403	PTAFR	5724	platelet-activating factor receptor [Source:HGNC Symbol;Acc:HGNC:9582]	1.58207999200255	1.31591437707217e-10	6.6561411722139e-09
ENSG00000169116	PARM1	25849	prostate androgen-regulated mucin-like protein 1 [Source:HGNC Symbol;Acc:HGNC:24536]	1.87787221036576	1.46453744538413e-10	7.38630707513124e-09
ENSG00000171401	KRT13	3860	keratin 13, type I [Source:HGNC Symbol;Acc:HGNC:6415]	-2.02055826717738	1.55293251263704e-10	7.80935451631053e-09
ENSG00000242147		105376382		2.90432372875565	1.56278874768319e-10	7.8361398684555e-09
ENSG00000258791	LINC00520	NA	long intergenic non-protein coding RNA 520 [Source:HGNC Symbol;Acc:HGNC:19843]	3.16352093613729	1.58104335372358e-10	7.90475981967176e-09
ENSG00000163286	ALPPL2	251	alkaline phosphatase, placental-like 2 [Source:HGNC Symbol;Acc:HGNC:441]	-2.81284390907552	1.62311106528861e-10	8.09169980358145e-09
ENSG00000064270	ATP2C2	9914	ATPase, Ca++ transporting, type 2C, member 2 [Source:HGNC Symbol;Acc:HGNC:29103]	1.50267866729093	1.68370546849282e-10	8.36966117800499e-09
ENSG00000163132	MSX1	4487	msh homeobox 1 [Source:HGNC Symbol;Acc:HGNC:7391]	1.81107496261099	1.7114828009224e-10	8.48336417568958e-09
ENSG00000246898	LINC00920	NA	long intergenic non-protein coding RNA 920 [Source:HGNC Symbol;Acc:HGNC:48611]	2.17541338059626	1.85302428467512e-10	9.15870488588424e-09
ENSG00000276903	HIST1H2AL	8332	histone cluster 1, H2al [Source:HGNC Symbol;Acc:HGNC:4730]	-1.53044245093508	1.86025550139895e-10	9.16825068908843e-09
ENSG00000175294	CATSPER1	117144	cation channel, sperm associated 1 [Source:HGNC Symbol;Acc:HGNC:17116]	2.05486289332023	1.87276118154847e-10	9.20366354534288e-09
ENSG00000143416	SELENBP1	8991	selenium binding protein 1 [Source:HGNC Symbol;Acc:HGNC:10719]	2.73069105002283	1.98666306474616e-10	9.73577460539486e-09
ENSG00000250722	SEPP1	6414	selenoprotein P, plasma, 1 [Source:HGNC Symbol;Acc:HGNC:10751]	2.26881318127545	2.05355463927536e-10	1.00351530239617e-08
ENSG00000079263	SP140	11262	SP140 nuclear body protein [Source:HGNC Symbol;Acc:HGNC:17133]	2.59669411624328	2.12819709580904e-10	1.03706145240565e-08
ENSG00000070729	CNGB1	1258	cyclic nucleotide gated channel beta 1 [Source:HGNC Symbol;Acc:HGNC:2151]	2.91682123282921	2.17404591769492e-10	1.05642753736529e-08
ENSG00000113083	LOX	4015	lysyl oxidase [Source:HGNC Symbol;Acc:HGNC:6664]	2.27126692941065	2.28633547498236e-10	1.10788003870364e-08
ENSG00000121753	ADGRB2	576	adhesion G protein-coupled receptor B2 [Source:HGNC Symbol;Acc:HGNC:944]	2.18118303178807	2.34776840994592e-10	1.13447055094007e-08
ENSG00000135480	KRT7	3855	keratin 7, type II [Source:HGNC Symbol;Acc:HGNC:6445]	1.59414423078751	2.57174051513198e-10	1.23923507440858e-08
ENSG00000263731		NA		-1.58452580297383	2.64595573335966e-10	1.27145522864969e-08
ENSG00000161999	JMJD8	339123	jumonji domain containing 8 [Source:HGNC Symbol;Acc:HGNC:14148]	-1.45559663466487	2.71264572278762e-10	1.29902872331098e-08
ENSG00000144130	NT5DC4	284958	5'-nucleotidase domain containing 4 [Source:HGNC Symbol;Acc:HGNC:27678]	3.70410638542868	2.71835596183928e-10	1.29902872331098e-08
ENSG00000171522	PTGER4	5734	prostaglandin E receptor 4 (subtype EP4) [Source:HGNC Symbol;Acc:HGNC:9596]	1.88473518321706	2.75780782805545e-10	1.31203829496204e-08
ENSG00000184270	HIST2H2AB	317772	histone cluster 2, H2ab [Source:HGNC Symbol;Acc:HGNC:20508]	-1.61758637046098	2.7607488257482e-10	1.31203829496204e-08
ENSG00000175471	MCTP1	79772	multiple C2 domains, transmembrane 1 [Source:HGNC Symbol;Acc:HGNC:26183]	1.65665347511517	2.85795737430873e-10	1.35451519501827e-08
ENSG00000023445	BIRC3	330	baculoviral IAP repeat containing 3 [Source:HGNC Symbol;Acc:HGNC:591]	1.73613523224638	2.86910072677714e-10	1.35561534462183e-08
ENSG00000101210	EEF1A2	1917	eukaryotic translation elongation factor 1 alpha 2 [Source:HGNC Symbol;Acc:HGNC:3192]	1.40167861349915	2.87595139300659e-10	1.35561534462183e-08
ENSG00000203852	HIST2H3A	333932	histone cluster 2, H3a [Source:HGNC Symbol;Acc:HGNC:20505]	-1.38257091812537	2.92894306105853e-10	1.37684201122966e-08
ENSG00000164684	ZNF704	619279	zinc finger protein 704 [Source:HGNC Symbol;Acc:HGNC:32291]	-1.5351603683186	3.02244423821813e-10	1.41694479341288e-08
ENSG00000142619	PADI3	51702	peptidyl arginine deiminase, type III [Source:HGNC Symbol;Acc:HGNC:18337]	1.91903458245121	3.0766005663714e-10	1.43843549182862e-08
ENSG00000157193	LRP8	7804	low density lipoprotein receptor-related protein 8, apolipoprotein e receptor [Source:HGNC Symbol;Acc:HGNC:6700]	-1.26724822453105	3.23487261955716e-10	1.5083574513671e-08
ENSG00000171202	TMEM126A	84233	transmembrane protein 126A [Source:HGNC Symbol;Acc:HGNC:25382]	-1.60761694772957	3.37470524960011e-10	1.5693286589471e-08
ENSG00000256980	KHDC1L	100129128	KH homology domain containing 1-like [Source:HGNC Symbol;Acc:HGNC:37274]	2.31976376319603	3.49471721603009e-10	1.62078051260334e-08
ENSG00000134278	SPIRE1	56907	spire-type actin nucleation factor 1 [Source:HGNC Symbol;Acc:HGNC:30622]	1.33985953818845	3.57212236471919e-10	1.65224986062239e-08
ENSG00000170465	KRT6C	286887	keratin 6C, type II [Source:HGNC Symbol;Acc:HGNC:20406]	-2.80226841138102	3.63247789550741e-10	1.67568626971687e-08
ENSG00000149289	ZC3H12C	85463	zinc finger CCCH-type containing 12C [Source:HGNC Symbol;Acc:HGNC:29362]	1.30625564143371	3.9024797643366e-10	1.79545205966114e-08
ENSG00000169752	NRG4	145957	neuregulin 4 [Source:HGNC Symbol;Acc:HGNC:29862]	-1.87674650484002	4.60368043442125e-10	2.11192496460875e-08
ENSG00000101017	CD40	958	CD40 molecule, TNF receptor superfamily member 5 [Source:HGNC Symbol;Acc:HGNC:11919]	3.47377428935961	4.61476175861095e-10	2.11192496460875e-08
ENSG00000125730	C3	718	complement component 3 [Source:HGNC Symbol;Acc:HGNC:1318]	1.7828976628125	5.54078533495208e-10	2.52902494747588e-08
ENSG00000271605	MILR1	284021	mast cell immunoglobulin-like receptor 1 [Source:HGNC Symbol;Acc:HGNC:27570]	3.31150657311519	5.88232841699017e-10	2.67785261277666e-08
ENSG00000101333	PLCB4	5332	phospholipase C, beta 4 [Source:HGNC Symbol;Acc:HGNC:9059]	1.44304843202881	5.92775630326437e-10	2.69145029632993e-08
ENSG00000062282	DGAT2	84649	diacylglycerol O-acyltransferase 2 [Source:HGNC Symbol;Acc:HGNC:16940]	2.00711460064165	6.09897203020466e-10	2.76194023954216e-08
ENSG00000255248		NA		1.98783507796535	6.2830713295822e-10	2.83788122533792e-08
ENSG00000188766	SPRED3	399473	sprouty-related, EVH1 domain containing 3 [Source:HGNC Symbol;Acc:HGNC:31041]	2.05160080323069	6.96255486752053e-10	3.1365947045114e-08
ENSG00000118515	SGK1	6446	serum/glucocorticoid regulated kinase 1 [Source:HGNC Symbol;Acc:HGNC:10810]	1.60385260161545	7.31345499355205e-10	3.2861157904794e-08
ENSG00000041982	TNC	3371	tenascin C [Source:HGNC Symbol;Acc:HGNC:5318]	1.85470853125762	7.46687559474341e-10	3.34635960915716e-08
ENSG00000260430		NA		2.90366756384152	7.90735974789694e-10	3.53461023976406e-08
ENSG00000101928	MOSPD1	56180	motile sperm domain containing 1 [Source:HGNC Symbol;Acc:HGNC:25235]	1.38858648506663	8.42780154608327e-10	3.75753966354883e-08
ENSG00000143067	ZNF697	90874	zinc finger protein 697 [Source:HGNC Symbol;Acc:HGNC:32034]	1.42674754664108	8.55818679872567e-10	3.80586307020965e-08
ENSG00000130600	H19	283120	H19, imprinted maternally expressed transcript (non-protein coding) [Source:HGNC Symbol;Acc:HGNC:4713]	-2.73449799434097	9.00909564494356e-10	3.99611142466356e-08
ENSG00000274180	NATD1	256302	N-acetyltransferase domain containing 1 [Source:HGNC Symbol;Acc:HGNC:30770]	2.80411181682947	9.10805942026113e-10	4.02967570105108e-08
ENSG00000115919	KYNU	8942	kynureninase [Source:HGNC Symbol;Acc:HGNC:6469]	1.98139948688399	9.17828008728013e-10	4.05038436810865e-08
ENSG00000180730	SHISA2	387914	shisa family member 2 [Source:HGNC Symbol;Acc:HGNC:20366]	2.05514268006816	1.00553659024287e-09	4.4261520291632e-08
ENSG00000117598		163404	Lipid phosphate phosphatase-related protein type 5 [Source:UniProtKB/Swiss-Prot;Acc:Q32ZL2]	3.31298686188429	1.03659979666648e-09	4.55130453871407e-08
ENSG00000224511	LINC00365	100874146	long intergenic non-protein coding RNA 365 [Source:HGNC Symbol;Acc:HGNC:42687]	3.29119849472875	1.05500715461413e-09	4.62039715637212e-08
ENSG00000141255	SPATA22	84690	spermatogenesis associated 22 [Source:HGNC Symbol;Acc:HGNC:30705]	3.28140056224769	1.09547177805903e-09	4.78549653753616e-08
ENSG00000140379	BCL2A1	597	BCL2-related protein A1 [Source:HGNC Symbol;Acc:HGNC:991]	5.30396480140281	1.19602132153956e-09	5.21158006078409e-08
ENSG00000153029	MR1	3140	major histocompatibility complex, class I-related [Source:HGNC Symbol;Acc:HGNC:4975]	1.30699933788019	1.23989172637996e-09	5.3891675815696e-08
ENSG00000237172	B3GNT9	84752	UDP-GlcNAc:betaGal beta-1,3-N-acetylglucosaminyltransferase 9 [Source:HGNC Symbol;Acc:HGNC:28714]	1.9148086072173	1.26134119323336e-09	5.4686569678556e-08
ENSG00000121797	CCRL2	9034	chemokine (C-C motif) receptor-like 2 [Source:HGNC Symbol;Acc:HGNC:1612]	4.08854123100564	1.26819219833708e-09	5.48461420975828e-08
ENSG00000137193	PIM1	5292	Pim-1 proto-oncogene, serine/threonine kinase [Source:HGNC Symbol;Acc:HGNC:8986]	1.3551608709423	1.38113976421538e-09	5.95818872348178e-08
ENSG00000175305	CCNE2	9134	cyclin E2 [Source:HGNC Symbol;Acc:HGNC:1590]	1.48284671053271	1.42005723600188e-09	6.11083833970064e-08
ENSG00000099622	CIRBP	1153	cold inducible RNA binding protein [Source:HGNC Symbol;Acc:HGNC:1982]	-1.34960413993264	1.46177686971887e-09	6.27475882612079e-08
ENSG00000167549	CORO6	84940	coronin 6 [Source:HGNC Symbol;Acc:HGNC:21356]	1.43055032887847	1.48027284586418e-09	6.3384257328229e-08
ENSG00000063660	GPC1	2817	glypican 1 [Source:HGNC Symbol;Acc:HGNC:4449]	-1.63570728232016	1.49624416745386e-09	6.3909945315517e-08
ENSG00000134548	SPX	80763	spexin hormone [Source:HGNC Symbol;Acc:HGNC:28139]	2.80441731285573	1.51120386308983e-09	6.43899399694361e-08
ENSG00000103316	CRYM	1428	crystallin, mu [Source:HGNC Symbol;Acc:HGNC:2418]	3.51919457450983	1.77993806287169e-09	7.56539276403377e-08
ENSG00000273102		NA		4.06961361635341	1.80166193933957e-09	7.63895830603803e-08
ENSG00000119408	NEK6	10783	NIMA-related kinase 6 [Source:HGNC Symbol;Acc:HGNC:7749]	-1.79546162967289	1.86374792254007e-09	7.88287904939379e-08
ENSG00000214289	RPL39P5	NA	ribosomal protein L39 pseudogene 5 [Source:HGNC Symbol;Acc:HGNC:26015]	1.67540493886376	2.12207873211752e-09	8.95361950900022e-08
ENSG00000183018	SPNS2	124976	spinster homolog 2 (Drosophila) [Source:HGNC Symbol;Acc:HGNC:26992]	3.46163059759506	2.21813880308411e-09	9.3361516191124e-08
ENSG00000235448	LURAP1L-AS1	NA	LURAP1L antisense RNA 1 [Source:HGNC Symbol;Acc:HGNC:49761]	3.37125503137332	2.23747196359733e-09	9.39466686851218e-08
ENSG00000217801		NA		2.36831056822861	2.24547483620089e-09	9.40544048218866e-08
ENSG00000243135	UGT1A3	54659	UDP glucuronosyltransferase 1 family, polypeptide A3 [Source:HGNC Symbol;Acc:HGNC:12535]	-1.80765660056537	2.28689300751148e-09	9.55578795578289e-08
ENSG00000172379	ARNT2	9915	aryl-hydrocarbon receptor nuclear translocator 2 [Source:HGNC Symbol;Acc:HGNC:16876]	1.79075772270105	2.33675066396971e-09	9.74059029783423e-08
ENSG00000184635	ZNF93	81931	zinc finger protein 93 [Source:HGNC Symbol;Acc:HGNC:13169]	1.82033580812649	2.34486121777597e-09	9.75090245343908e-08
ENSG00000152926	ZNF117	51351	zinc finger protein 117 [Source:HGNC Symbol;Acc:HGNC:12897]	1.52617696102236	2.40227276598547e-09	9.96568742896465e-08
ENSG00000143320	CRABP2	1382	cellular retinoic acid binding protein 2 [Source:HGNC Symbol;Acc:HGNC:2339]	2.34778714085336	2.43294939954955e-09	1.00688018332076e-07
ENSG00000241635	UGT1A1	54658	UDP glucuronosyltransferase 1 family, polypeptide A1 [Source:HGNC Symbol;Acc:HGNC:12530]	-1.8039855420734	2.44868674651041e-09	1.01097451140534e-07
ENSG00000100055	CYTH4	27128	cytohesin 4 [Source:HGNC Symbol;Acc:HGNC:9505]	3.19924575456714	2.54965040725686e-09	1.05015243797944e-07
ENSG00000188549	C15orf52	388115	chromosome 15 open reading frame 52 [Source:HGNC Symbol;Acc:HGNC:33488]	2.04932192241091	2.61367329577021e-09	1.0739651863071e-07
ENSG00000127863	TNFRSF19	55504	tumor necrosis factor receptor superfamily, member 19 [Source:HGNC Symbol;Acc:HGNC:11915]	2.72958962227567	2.6467526399855e-09	1.08471943540866e-07
ENSG00000010704	HFE	3077	hemochromatosis [Source:HGNC Symbol;Acc:HGNC:4886]	-1.39686019973695	2.65508330402833e-09	1.08471943540866e-07
ENSG00000163993	S100P	6286	S100 calcium binding protein P [Source:HGNC Symbol;Acc:HGNC:10504]	2.27227274771177	2.65865680451629e-09	1.08471943540866e-07
ENSG00000172738	TMEM217	221468	transmembrane protein 217 [Source:HGNC Symbol;Acc:HGNC:21238]	2.2844633594603	2.68177716370299e-09	1.09157795658583e-07
ENSG00000196542	SPTSSB	165679	serine palmitoyltransferase, small subunit B [Source:HGNC Symbol;Acc:HGNC:24045]	2.45447673893785	3.04249767986949e-09	1.23549688648034e-07
ENSG00000163435	ELF3	1999	E74-like factor 3 (ets domain transcription factor, epithelial-specific ) [Source:HGNC Symbol;Acc:HGNC:3318]	-1.24323972216227	3.05618914500424e-09	1.23815025806624e-07
ENSG00000163898	LIPH	200879	lipase, member H [Source:HGNC Symbol;Acc:HGNC:18483]	2.24447606809352	3.41882080565289e-09	1.3818266616119e-07
ENSG00000167165	UGT1A6	54578	UDP glucuronosyltransferase 1 family, polypeptide A6 [Source:HGNC Symbol;Acc:HGNC:12538]	-1.72711535211757	3.5316126513869e-09	1.42408781483315e-07
ENSG00000158373	HIST1H2BD	3017	histone cluster 1, H2bd [Source:HGNC Symbol;Acc:HGNC:4747]	-1.20674785768346	3.67942222472238e-09	1.48024011780168e-07
ENSG00000128965	CHAC1	79094	ChaC glutathione-specific gamma-glutamylcyclotransferase 1 [Source:HGNC Symbol;Acc:HGNC:28680]	1.59501902834743	3.82216380292155e-09	1.5316803686731e-07
ENSG00000129226	CD68	968	CD68 molecule [Source:HGNC Symbol;Acc:HGNC:1693]	1.4234223658166	3.82499519779628e-09	1.5316803686731e-07
ENSG00000186814	ZSCAN30	100101467	zinc finger and SCAN domain containing 30 [Source:HGNC Symbol;Acc:HGNC:33517]	1.31693921248676	3.91125499724057e-09	1.56260508538718e-07
ENSG00000211772	TRBC2	NA	T cell receptor beta constant 2 [Source:HGNC Symbol;Acc:HGNC:12157]	3.53218303710936	4.21387504769553e-09	1.67962729147661e-07
ENSG00000021300	PLEKHB1	58473	pleckstrin homology domain containing, family B (evectins) member 1 [Source:HGNC Symbol;Acc:HGNC:19079]	1.73607055196504	4.44875119300935e-09	1.76917119282457e-07
ENSG00000166401	SERPINB8	5271	serpin peptidase inhibitor, clade B (ovalbumin), member 8 [Source:HGNC Symbol;Acc:HGNC:8952]	1.71778991191898	4.49628865164272e-09	1.7839747106598e-07
ENSG00000271503	CCL5	6352	chemokine (C-C motif) ligand 5 [Source:HGNC Symbol;Acc:HGNC:10632]	2.75347258177328	4.51017295347508e-09	1.78538860233788e-07
ENSG00000111275	ALDH2	217	aldehyde dehydrogenase 2 family (mitochondrial) [Source:HGNC Symbol;Acc:HGNC:404]	2.34079958525895	4.53612051494067e-09	1.79156047461093e-07
ENSG00000169504	CLIC4	25932	chloride intracellular channel 4 [Source:HGNC Symbol;Acc:HGNC:13518]	1.18229454125273	4.79088044545162e-09	1.88786881152318e-07
ENSG00000102359	SRPX2	27286	sushi-repeat containing protein, X-linked 2 [Source:HGNC Symbol;Acc:HGNC:30668]	1.64681718517032	4.83958799630824e-09	1.9027280170031e-07
ENSG00000244474	UGT1A4	54657	UDP glucuronosyltransferase 1 family, polypeptide A4 [Source:HGNC Symbol;Acc:HGNC:12536]	-1.78115977844423	4.90654029118067e-09	1.92467665526382e-07
ENSG00000242515	UGT1A10	54575	UDP glucuronosyltransferase 1 family, polypeptide A10 [Source:HGNC Symbol;Acc:HGNC:12531]	-1.78999283499873	4.96064034184875e-09	1.94149586591949e-07
ENSG00000113504	SLC12A7	10723	solute carrier family 12 (potassium/chloride transporter), member 7 [Source:HGNC Symbol;Acc:HGNC:10915]	2.24507205994625	5.4785625625168e-09	2.13936013022524e-07
ENSG00000074966	TXK	7294	TXK tyrosine kinase [Source:HGNC Symbol;Acc:HGNC:12434]	2.59431092393515	5.77224169383639e-09	2.24896416805576e-07
ENSG00000144476	ACKR3	57007	atypical chemokine receptor 3 [Source:HGNC Symbol;Acc:HGNC:23692]	-1.97732724326496	5.94959365992064e-09	2.31285439826892e-07
ENSG00000134363	FST	10468	follistatin [Source:HGNC Symbol;Acc:HGNC:3971]	1.31137617195069	5.97558643648125e-09	2.31775044315447e-07
ENSG00000135390	ATP5G2	517	ATP synthase, H+ transporting, mitochondrial Fo complex, subunit C2 (subunit 9) [Source:HGNC Symbol;Acc:HGNC:842]	-1.30046178259976	6.09720289630818e-09	2.3596311611462e-07
ENSG00000145040	UCN2	90226	urocortin 2 [Source:HGNC Symbol;Acc:HGNC:18414]	1.53839165499369	6.12444442594162e-09	2.36488312777598e-07
ENSG00000124772	CPNE5	57699	copine V [Source:HGNC Symbol;Acc:HGNC:2318]	2.36320553118601	6.33253793493379e-09	2.43979006094476e-07
ENSG00000058866	DGKG	1608	diacylglycerol kinase, gamma 90kDa [Source:HGNC Symbol;Acc:HGNC:2853]	1.92038744784871	6.54094623595079e-09	2.51448508746028e-07
ENSG00000242366	UGT1A8	54576	UDP glucuronosyltransferase 1 family, polypeptide A8 [Source:HGNC Symbol;Acc:HGNC:12540]	-1.79215386807011	6.64881081994133e-09	2.54380599818761e-07
ENSG00000241119	UGT1A9	54600	UDP glucuronosyltransferase 1 family, polypeptide A9 [Source:HGNC Symbol;Acc:HGNC:12541]	-1.79487974853768	6.65020027688497e-09	2.54380599818761e-07
ENSG00000006756	ARSD	414	arylsulfatase D [Source:HGNC Symbol;Acc:HGNC:717]	1.46924021840898	6.66133370240468e-09	2.54380599818761e-07
ENSG00000240224	UGT1A5	54579	UDP glucuronosyltransferase 1 family, polypeptide A5 [Source:HGNC Symbol;Acc:HGNC:12537]	-1.796977804761	6.71398226096977e-09	2.55826385754441e-07
ENSG00000105246	EBI3	10148	Epstein-Barr virus induced 3 [Source:HGNC Symbol;Acc:HGNC:3129]	4.86673287686614	6.90372158324053e-09	2.62477977293358e-07
ENSG00000234883	MIR155HG	114614	MIR155 host gene [Source:HGNC Symbol;Acc:HGNC:35460]	2.18054917531882	7.03930677106716e-09	2.67045982089234e-07
ENSG00000244122	UGT1A7	54577	UDP glucuronosyltransferase 1 family, polypeptide A7 [Source:HGNC Symbol;Acc:HGNC:12539]	-1.71780402519919	7.1444073326004e-09	2.70440049117406e-07
ENSG00000224081	LINC01057	101928079	long intergenic non-protein coding RNA 1057 [Source:HGNC Symbol;Acc:HGNC:49057]	1.76991822051921	7.25384945700285e-09	2.73983278944743e-07
ENSG00000213344	PCNPP3	NA	PEST containing nuclear protein pseudogene 3 [Source:HGNC Symbol;Acc:HGNC:41975]	4.84691281490595	7.31481035481933e-09	2.75683887424879e-07
ENSG00000135439	AGAP2	116986	ArfGAP with GTPase domain, ankyrin repeat and PH domain 2 [Source:HGNC Symbol;Acc:HGNC:16921]	1.86182801508716	7.57574712997634e-09	2.8489749913361e-07
ENSG00000163235	TGFA	7039	transforming growth factor, alpha [Source:HGNC Symbol;Acc:HGNC:11765]	1.13304629194865	7.69471386582503e-09	2.88743720531252e-07
ENSG00000135919	SERPINE2	5270	serpin peptidase inhibitor, clade E (nexin, plasminogen activator inhibitor type 1), member 2 [Source:HGNC Symbol;Acc:HGNC:8951]	1.32250358305648	7.92221347841553e-09	2.96637166586819e-07
ENSG00000163346	PBXIP1	57326	pre-B-cell leukemia homeobox interacting protein 1 [Source:HGNC Symbol;Acc:HGNC:21199]	1.46318877678273	7.97840041239111e-09	2.97786147727047e-07
ENSG00000128602	SMO	6608	smoothened, frizzled class receptor [Source:HGNC Symbol;Acc:HGNC:11119]	-1.84252343886478	7.98732716026069e-09	2.97786147727047e-07
ENSG00000157064	NMNAT2	23057	nicotinamide nucleotide adenylyltransferase 2 [Source:HGNC Symbol;Acc:HGNC:16789]	1.69654411602646	8.47014095212371e-09	3.15107458775888e-07
ENSG00000138166	DUSP5	1847	dual specificity phosphatase 5 [Source:HGNC Symbol;Acc:HGNC:3071]	1.42100575783398	8.73153870550126e-09	3.24134952932331e-07
ENSG00000121552	CSTA	1475	cystatin A (stefin A) [Source:HGNC Symbol;Acc:HGNC:2481]	1.66151708342362	9.40831338740747e-09	3.48510520960946e-07
ENSG00000261092		NA		3.81222482147464	9.67449936666135e-09	3.57605052444177e-07
ENSG00000136490	LIMD2	80774	LIM domain containing 2 [Source:HGNC Symbol;Acc:HGNC:28142]	2.30342972132402	1.0035743210158e-08	3.70166997425422e-07
ENSG00000265763	ZNF488	118738	zinc finger protein 488 [Source:HGNC Symbol;Acc:HGNC:23535]	-2.10770664761952	1.00874157724057e-08	3.7128128818478e-07
ENSG00000112144	ICK	22858	intestinal cell (MAK-like) kinase [Source:HGNC Symbol;Acc:HGNC:21219]	-1.3974862781827	1.02763387704917e-08	3.77431813993069e-07
ENSG00000075213	SEMA3A	10371	sema domain, immunoglobulin domain (Ig), short basic domain, secreted, (semaphorin) 3A [Source:HGNC Symbol;Acc:HGNC:10723]	1.18970439725796	1.03017139336321e-08	3.77562180800639e-07
ENSG00000118985	ELL2	22936	elongation factor, RNA polymerase II, 2 [Source:HGNC Symbol;Acc:HGNC:17064]	1.12116939602796	1.06713027043454e-08	3.90280899540108e-07
ENSG00000137941	TTLL7	79739	tubulin tyrosine ligase-like family member 7 [Source:HGNC Symbol;Acc:HGNC:26242]	1.7680619996391	1.09942444177291e-08	4.00974531580936e-07
ENSG00000173227	SYT12	91683	synaptotagmin XII [Source:HGNC Symbol;Acc:HGNC:18381]	-1.85426264218047	1.10100527487684e-08	4.00974531580936e-07
ENSG00000057657	PRDM1	639	PR domain containing 1, with ZNF domain [Source:HGNC Symbol;Acc:HGNC:9346]	2.2545707275235	1.14445341401319e-08	4.15922260693573e-07
ENSG00000100311	PDGFB	5155	platelet-derived growth factor beta polypeptide [Source:HGNC Symbol;Acc:HGNC:8800]	1.48178669830121	1.1802428255856e-08	4.28029782805144e-07
ENSG00000247844	CCAT1	NA	colon cancer associated transcript 1 (non-protein coding) [Source:HGNC Symbol;Acc:HGNC:45128]	1.55234881048877	1.31205686474305e-08	4.7483832015042e-07
ENSG00000276410	HIST1H2BB	3018	histone cluster 1, H2bb [Source:HGNC Symbol;Acc:HGNC:4751]	-1.34723444874638	1.40577348362707e-08	5.07692599024314e-07
ENSG00000153208	MERTK	10461	MER proto-oncogene, tyrosine kinase [Source:HGNC Symbol;Acc:HGNC:7027]	2.13544391555883	1.41900951538322e-08	5.11405116804465e-07
ENSG00000102760	RGCC	28984	regulator of cell cycle [Source:HGNC Symbol;Acc:HGNC:20369]	2.84529919508083	1.42318332772998e-08	5.11843001796277e-07
ENSG00000173805	HAP1	9001	huntingtin-associated protein 1 [Source:HGNC Symbol;Acc:HGNC:4812]	1.80047532891904	1.42870473299516e-08	5.12762721495503e-07
ENSG00000155846	PPARGC1B	133522	peroxisome proliferator-activated receptor gamma, coactivator 1 beta [Source:HGNC Symbol;Acc:HGNC:30022]	-1.50369732973406	1.47429340263218e-08	5.28029018056607e-07
ENSG00000261618		NA		2.88137944189214	1.49573235551233e-08	5.34600702851401e-07
ENSG00000120800	UTP20	27340	UTP20, small subunit (SSU) processome component, homolog (yeast) [Source:HGNC Symbol;Acc:HGNC:17897]	-1.12649622388521	1.51640031787525e-08	5.40870290699463e-07
ENSG00000169908	TM4SF1	4071	transmembrane 4 L six family member 1 [Source:HGNC Symbol;Acc:HGNC:11853]	1.13607111331688	1.61403106017052e-08	5.74508710080039e-07
ENSG00000111012	CYP27B1	1594	cytochrome P450, family 27, subfamily B, polypeptide 1 [Source:HGNC Symbol;Acc:HGNC:2606]	1.52472945101333	1.62686951189686e-08	5.77889439143815e-07
ENSG00000154639	CXADR	1525	coxsackie virus and adenovirus receptor [Source:HGNC Symbol;Acc:HGNC:2559]	1.47441177349502	1.71462800213915e-08	6.078145452665e-07
ENSG00000273542	HIST1H4K	8362	histone cluster 1, H4k [Source:HGNC Symbol;Acc:HGNC:4784]	-1.4211660759131	1.72583146846915e-08	6.10534940144126e-07
ENSG00000158125	XDH	7498	xanthine dehydrogenase [Source:HGNC Symbol;Acc:HGNC:12805]	1.29566456644353	1.73178736145733e-08	6.11391623792863e-07
ENSG00000168032	ENTPD3	956	ectonucleoside triphosphate diphosphohydrolase 3 [Source:HGNC Symbol;Acc:HGNC:3365]	2.49831140789793	1.76260665067836e-08	6.21004734217614e-07
ENSG00000033122	LRRC7	57554	leucine rich repeat containing 7 [Source:HGNC Symbol;Acc:HGNC:18531]	-1.89864604115466	1.81554016667652e-08	6.38354254945878e-07
ENSG00000258077		NA		3.59120971919158	1.94573131449219e-08	6.82742515403659e-07
ENSG00000086730	LAT2	7462	linker for activation of T cells family, member 2 [Source:HGNC Symbol;Acc:HGNC:12749]	1.80088610391134	2.08418199452111e-08	7.29843407352645e-07
ENSG00000188385	JAKMIP3	282973	Janus kinase and microtubule interacting protein 3 [Source:HGNC Symbol;Acc:HGNC:23523]	-2.28806839280977	2.12386287052188e-08	7.42236440346626e-07
ENSG00000163453	IGFBP7	3490	insulin-like growth factor binding protein 7 [Source:HGNC Symbol;Acc:HGNC:5476]	1.75727791081695	2.20040795166946e-08	7.67436636208265e-07
ENSG00000226328	NUP50-AS1	NA	NUP50 antisense RNA 1 (head to head) [Source:HGNC Symbol;Acc:HGNC:50502]	1.29013820708377	2.21596955554514e-08	7.71309000832502e-07
ENSG00000153714	LURAP1L	286343	leucine rich adaptor protein 1-like [Source:HGNC Symbol;Acc:HGNC:31452]	2.07477366559805	2.23504651592748e-08	7.76386941345972e-07
ENSG00000197238	HIST1H4J	8363	histone cluster 1, H4j [Source:HGNC Symbol;Acc:HGNC:4785]	-1.38011716616542	2.37095805784784e-08	8.21947964783764e-07
ENSG00000145819	ARHGAP26	23092	Rho GTPase activating protein 26 [Source:HGNC Symbol;Acc:HGNC:17073]	1.39760541121633	2.4123355990964e-08	8.34619870575373e-07
ENSG00000081041	CXCL2	2920	chemokine (C-X-C motif) ligand 2 [Source:HGNC Symbol;Acc:HGNC:4603]	1.82893218302567	2.43127702796004e-08	8.39494237658299e-07
ENSG00000144583	MARCH4	57574	membrane-associated ring finger (C3HC4) 4, E3 ubiquitin protein ligase [Source:HGNC Symbol;Acc:HGNC:29269]	2.79507344710797	2.45671765870418e-08	8.46588820277364e-07
ENSG00000173559	NABP1	64859	nucleic acid binding protein 1 [Source:HGNC Symbol;Acc:HGNC:26232]	1.15067865808977	2.5404531414576e-08	8.73703755349405e-07
ENSG00000078401	EDN1	1906	endothelin 1 [Source:HGNC Symbol;Acc:HGNC:3176]	2.39251780446347	2.56945882478086e-08	8.81925956545321e-07
ENSG00000148803	FUOM	282969	fucose mutarotase [Source:HGNC Symbol;Acc:HGNC:24733]	2.28720513870184	2.58190165373662e-08	8.84441915009698e-07
ENSG00000166592	RRAD	6236	Ras-related associated with diabetes [Source:HGNC Symbol;Acc:HGNC:10446]	2.81576591286789	2.76838481107318e-08	9.46448396180928e-07
ENSG00000238120	LINC01589	100506737	long intergenic non-protein coding RNA 1589 [Source:HGNC Symbol;Acc:HGNC:51520]	1.98414036161078	2.79178817263934e-08	9.51990383478251e-07
ENSG00000087095	NLK	51701	nemo-like kinase [Source:HGNC Symbol;Acc:HGNC:29858]	1.08836337077643	2.79776483883069e-08	9.51990383478251e-07
ENSG00000185716	C16orf52	730094,102725138	chromosome 16 open reading frame 52 [Source:HGNC Symbol;Acc:HGNC:27087]	1.19496120903061	2.80110471813648e-08	9.51990383478251e-07
ENSG00000272068		NA		2.08044465481604	2.86802006999004e-08	9.72821160603093e-07
ENSG00000120217	CD274	29126	CD274 molecule [Source:HGNC Symbol;Acc:HGNC:17635]	1.28657106320292	2.91232777024723e-08	9.85916988209528e-07
ENSG00000165801	ARHGEF40	55701	Rho guanine nucleotide exchange factor (GEF) 40 [Source:HGNC Symbol;Acc:HGNC:25516]	1.59103538235285	3.03256757689397e-08	1.0238968173143e-06
ENSG00000130768	SMPDL3B	27293	sphingomyelin phosphodiesterase, acid-like 3B [Source:HGNC Symbol;Acc:HGNC:21416]	2.08085858452825	3.0363550915211e-08	1.0238968173143e-06
ENSG00000231851		101927492		3.73550453181432	3.16774839014983e-08	1.06612605838914e-06
ENSG00000169851	PCDH7	5099	protocadherin 7 [Source:HGNC Symbol;Acc:HGNC:8659]	1.40352210316716	3.2394272441145e-08	1.08813304652304e-06
ENSG00000106823	ECM2	1842	extracellular matrix protein 2, female organ and adipocyte specific [Source:HGNC Symbol;Acc:HGNC:3154]	1.99526603446512	3.24704293848961e-08	1.08857743784751e-06
ENSG00000163053	SLC16A14	151473	solute carrier family 16, member 14 [Source:HGNC Symbol;Acc:HGNC:26417]	-1.35766587126227	3.41766225718146e-08	1.14356169027045e-06
ENSG00000164463	CREBRF	153222	CREB3 regulatory factor [Source:HGNC Symbol;Acc:HGNC:24050]	1.38198116141884	3.44178263619955e-08	1.14940922439413e-06
ENSG00000159842	ABR	29	active BCR-related [Source:HGNC Symbol;Acc:HGNC:81]	1.47325001434257	3.48525325555065e-08	1.16168393194163e-06
ENSG00000171587	DSCAM	1826	Down syndrome cell adhesion molecule [Source:HGNC Symbol;Acc:HGNC:3039]	2.71153435499697	3.59788872431058e-08	1.19692071234324e-06
ENSG00000111981	ULBP1	80329	UL16 binding protein 1 [Source:HGNC Symbol;Acc:HGNC:14893]	1.46936620856038	3.67309912653152e-08	1.21959581170573e-06
ENSG00000174938	SEZ6L2	26470	seizure related 6 homolog (mouse)-like 2 [Source:HGNC Symbol;Acc:HGNC:30844]	1.36765072420157	3.79501026452176e-08	1.25766058555483e-06
[truncated: 16,777 more rows]

## Sheet: H460
Ensembl gene ID	HGNC gene symbol	Entez gene ID	Description	Log2 fold-change	Raw P	FDR
[truncated: 19,976 more rows]

[truncated: 4 more sheets: H522, H1299, HSC2, SCC4]
